# Supplementary material for: Clinical manifestations, risk factors, and maternal and perinatal outcomes of coronavirus disease 2019 in pregnancy: living systematic review and meta-analysis
Source: PubMed Central journal article supplement — BMJ. 2020 Sep 1;370:m3320. doi: 10.1136/bmj.m3320 (PMC7459193; doi:10.1136/bmj.m3320), 2020-09-01

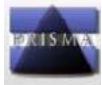

# PRISMA 2009 Checklist

| Section/topic                      | #  | Checklist item                                                                                                                                                                                                                                                                                              | Reported on page # |
|------------------------------------|----|-------------------------------------------------------------------------------------------------------------------------------------------------------------------------------------------------------------------------------------------------------------------------------------------------------------|--------------------|
| <b>TITLE</b>                       |    |                                                                                                                                                                                                                                                                                                             |                    |
| Title                              | 1  | Identify the report as a systematic review, meta-analysis, or both.                                                                                                                                                                                                                                         | 1                  |
| <b>ABSTRACT</b>                    |    |                                                                                                                                                                                                                                                                                                             |                    |
| Structured summary                 | 2  | Provide a structured summary including, as applicable: background; objectives; data sources; study eligibility criteria, participants, and interventions; study appraisal and synthesis methods; results; limitations; conclusions and implications of key findings; systematic review registration number. | 3-4                |
| <b>INTRODUCTION</b>                |    |                                                                                                                                                                                                                                                                                                             |                    |
| Rationale                          | 3  | Describe the rationale for the review in the context of what is already known.                                                                                                                                                                                                                              | 6                  |
| Objectives                         | 4  | Provide an explicit statement of questions being addressed with reference to participants, interventions, comparisons, outcomes, and study design (PICOS).                                                                                                                                                  | 7                  |
| <b>METHODS</b>                     |    |                                                                                                                                                                                                                                                                                                             |                    |
| Protocol and registration          | 5  | Indicate if a review protocol exists, if and where it can be accessed (e.g., Web address), and, if available, provide registration information including registration number.                                                                                                                               | 7                  |
| Eligibility criteria               | 6  | Specify study characteristics (e.g., PICOS, length of follow-up) and report characteristics (e.g., years considered, language, publication status) used as criteria for eligibility, giving rationale.                                                                                                      | 8-9                |
| Information sources                | 7  | Describe all information sources (e.g., databases with dates of coverage, contact with study authors to identify additional studies) in the search and date last searched.                                                                                                                                  | 7-8                |
| Search                             | 8  | Present full electronic search strategy for at least one database, including any limits used, such that it could be repeated.                                                                                                                                                                               | 8                  |
| Study selection                    | 9  | State the process for selecting studies (i.e., screening, eligibility, included in systematic review, and, if applicable, included in the meta-analysis).                                                                                                                                                   | 8-9                |
| Data collection process            | 10 | Describe method of data extraction from reports (e.g., piloted forms, independently, in duplicate) and any processes for obtaining and confirming data from investigators.                                                                                                                                  | 10                 |
| Data items                         | 11 | List and define all variables for which data were sought (e.g., PICOS, funding sources) and any assumptions and simplifications made.                                                                                                                                                                       | 9                  |
| Risk of bias in individual studies | 12 | Describe methods used for assessing risk of bias of individual studies (including specification of whether this was done at the study or outcome level), and how this information is to be used in any data synthesis.                                                                                      | 10                 |
| Summary measures                   | 13 | State the principal summary measures (e.g., risk ratio, difference in means).                                                                                                                                                                                                                               | 10-11              |
| Synthesis of results               | 14 | Describe the methods of handling data and combining results of studies, if done, including measures of consistency (e.g., $I^2$ ) for each meta-analysis.                                                                                                                                                   | 10-11              |



# PRISMA 2009 Checklist

| Section/topic                 | #  | Checklist item                                                                                                                                                                                           | Reported on page # |
|-------------------------------|----|----------------------------------------------------------------------------------------------------------------------------------------------------------------------------------------------------------|--------------------|
| Risk of bias across studies   | 15 | Specify any assessment of risk of bias that may affect the cumulative evidence (e.g., publication bias, selective reporting within studies).                                                             | 10                 |
| Additional analyses           | 16 | Describe methods of additional analyses (e.g., sensitivity or subgroup analyses, meta-regression), if done, indicating which were pre-specified.                                                         | 10-11              |
| <b>RESULTS</b>                |    |                                                                                                                                                                                                          |                    |
| Study selection               | 17 | Give numbers of studies screened, assessed for eligibility, and included in the review, with reasons for exclusions at each stage, ideally with a flow diagram.                                          | 11                 |
| Study characteristics         | 18 | For each study, present characteristics for which data were extracted (e.g., study size, PICOS, follow-up period) and provide the citations.                                                             | 11                 |
| Risk of bias within studies   | 19 | Present data on risk of bias of each study and, if available, any outcome level assessment (see item 12).                                                                                                | 12                 |
| Results of individual studies | 20 | For all outcomes considered (benefits or harms), present, for each study: (a) simple summary data for each intervention group (b) effect estimates and confidence intervals, ideally with a forest plot. | 11-15              |
| Synthesis of results          | 21 | Present results of each meta-analysis done, including confidence intervals and measures of consistency.                                                                                                  | 11-15              |
| Risk of bias across studies   | 22 | Present results of any assessment of risk of bias across studies (see Item 15).                                                                                                                          | 12                 |
| Additional analysis           | 23 | Give results of additional analyses, if done (e.g., sensitivity or subgroup analyses, meta-regression [see Item 16]).                                                                                    | 11-15              |
| <b>DISCUSSION</b>             |    |                                                                                                                                                                                                          |                    |
| Summary of evidence           | 24 | Summarize the main findings including the strength of evidence for each main outcome; consider their relevance to key groups (e.g., healthcare providers, users, and policy makers).                     | 15-16              |
| Limitations                   | 25 | Discuss limitations at study and outcome level (e.g., risk of bias), and at review-level (e.g., incomplete retrieval of identified research, reporting bias).                                            | 16-21              |
| Conclusions                   | 26 | Provide a general interpretation of the results in the context of other evidence, and implications for future research.                                                                                  | 21                 |
| <b>FUNDING</b>                |    |                                                                                                                                                                                                          |                    |
| Funding                       | 27 | Describe sources of funding for the systematic review and other support (e.g., supply of data); role of funders for the systematic review.                                                               | 22                 |

From: Moher D, Liberati A, Tetzlaff J, Altman DG, The PRISMA Group (2009). Preferred Reporting Items for Systematic Reviews and Meta-Analyses: The PRISMA Statement. PLoS Med 6(7): e1000097. doi:10.1371/journal.pmed1000097

For more information, visit: [www.prisma-statement.org](http://www.prisma-statement.org).

## Appendix 2. Details of search strategies used to include studies in the living systematic review on COVID-19 in pregnant and recently pregnant women

### 1. Cochrane Gynaecology and Fertility

#### Pubmed

| Item | Term                                                |
|------|-----------------------------------------------------|
| 1    | pregnancy/                                          |
| 2    | pregnan*.tw.                                        |
| 3    | neonatal.tw.                                        |
| 4    | perinatal.tw.                                       |
| 5    | mothers/.                                           |
| 6    | mother.tw.                                          |
| 7    | maternal.tw.                                        |
| 8    | obstetric.tw.                                       |
| 9    | infant, newborn/                                    |
| 10   | infant.tw.                                          |
| 11   | newborn.tw.                                         |
| 12   | child*.tw.                                          |
| 13   | or/1-12                                             |
| 14   | COVID-19.tw.                                        |
| 15   | COVID-2019.tw.                                      |
| 16   | severe acute respiratory syndrome coronavirus 2.tw. |
| 17   | 2019-nCoV.tw.                                       |
| 18   | SARS-CoV-2.tw.                                      |
| 19   | 2019nCoV.tw                                         |
| 20   | or/14-19                                            |
| 21   | coronavirus.tw.                                     |
| 22   | 2019/12.pd                                          |
| 23   | 2020.pd.                                            |
| 24   | or/22-23                                            |
| 25   | 21 and 24                                           |
| 24   | or/20-25                                            |
| 25   | 13 and 24                                           |

#### Google Scholar and Google

Using the following text words (pregnancy OR neonatal OR perinatal OR maternal OR obstetric OR newborn) AND (COVID-19 or SARS-Cov-2)

## 2. EPPI Centre

The MEDLINE search strategy is the OVID Expert Search as developed by Wolters Kluwer and available at <http://tools.ovid.com/coronavirus/>

### MEDLINE search strategy

- 1 exp Coronavirus/
- 2 exp Coronavirus Infections/
- 3 (coronavirus\* or corona virus\* or OC43 or NL63 or 229E or HKU1 or HCoV\* or ncov\* or covid\* or sars-cov\* or sarscov\* or Sars-coronavirus\* or Severe Acute Respiratory Syndrome Coronavirus\*).mp.
- 4 (or/1-3) and ((20191\* or 202\*).dp. or 20190101:20301231.(ep).)
- 5 4 not (SARS or SARS-CoV or MERS or MERS-CoV or Middle East respiratory syndrome or camel\* or dromedar\* or equine or coronary or coronal or covidence\* or covidien or influenza virus or HIV or bovine or calves or TGEV or feline or porcine or BCoV or PED or PEDV or PDCoV or FIPV or FCoV or SADS-CoV or canine or CCoV or zoonotic or avian influenza or H1N1 or H5N1 or H5N6 or IBV or murine corona\*).mp.
- 6 ((pneumonia or covid\* or coronavirus\* or corona virus\* or ncov\* or 2019-ncov or sars\*).mp. or exp pneumonia/) and Wuhan.mp.
- 7 (2019-ncov or ncov19 or ncov-19 or 2019-novel CoV or sars-cov2 or sars-cov-2 or sarscov2 or sarscov-2 or Sars-coronavirus2 or Sars-coronavirus-2 or SARS-like coronavirus\* or coronavirus-19 or covid19 or covid-19 or covid 2019 or ((novel or new or nouveau) adj2 (CoV on nCoV or covid or coronavirus\* or corona virus or Pandemi\*2)) or ((covid or covid19 or covid-19) and pandemic\*2) or (coronavirus\* and pneumonia)).mp.
- 8 COVID-19.rx,px,ox. or severe acute respiratory syndrome coronavirus 2.os.
- 9 ("32240632" or "32236488" or "32268021" or "32267941" or "32169616" or "32267649" or "32267499" or "32267344" or "32248853" or "32246156" or "32243118" or "32240583" or "32237674" or "32234725" or "32173381" or "32227595" or "32185863" or "32221979" or "32213260" or "32205350" or "32202721" or "32197097" or "32196032" or "32188729" or "32176889" or "32088947" or "32277065" or "32273472" or "32273444" or "32145185" or "31917786" or "32267384" or "32265186" or "32253187" or "32265567" or "32231286" or "32105468" or "32179788" or "32152361" or "32152148" or "32140676" or "32053580" or "32029604" or "32127714" or "32047315" or "32020111" or "32267950" or "32249952" or "32172715").ui.
- 10 or/6-9
- 11 5 or 10

The Embase search strategy as at 21st April 2020

- 1 exp Coronavirus Infections/
- 2 exp coronavirinae/
- 3 (coronavirus\* or corona virus\* or OC43 or NL63 or 229E or HKU1 or HCoV\* or ncov\* or covid\* or sars-cov\* or sarscov\* or Sars-coronavirus\* or Severe Acute Respiratory Syndrome Coronavirus\*).mp.
- 4 or/1-3
- 5 4 not (SARS or SARS-CoV or MERS or MERS-CoV or Middle East respiratory syndrome or camel\* or dromedar\* or equine or coronary or coronal or covidence\* or covidien or

influenza virus or HIV or bovine or calves or TGEV or feline or porcine or BCoV or PED or PEDV or PDCoV or FIPV or FCoV or SADS-CoV or canine or CCov or zoonotic or avian influenza or H1N1 or H5N1 or H5N6 or IBV or murine corona\*).mp.

6 ((pneumonia or covid\* or coronavirus\* or corona virus\* or ncov\* or 2019-ncov or sars\*).mp. or exp pneumonia/) and Wuhan.mp.

7 (2019-ncov or ncov19 or ncov-19 or 2019-novel CoV or sars-cov2 or sars-cov-2 or sarscov2 or sarscov-2 or Sars-coronavirus2 or Sars-coronavirus-2 or SARS-like coronavirus\* or coronavirus-19 or covid19 or covid-19 or covid 2019 or ((novel or new or nouveau) adj2 (CoV on nCoV or covid or coronavirus\* or corona virus or Pandemi\*2)) or ((covid or covid19 or covid-19) and pandemic\*2) or (coronavirus\* and pneumonia)).mp.

8 6 or 7

9 5 or 8

### 3. WHO COVID-19 database

The WHO COVID-19 database contained articles on the novel coronavirus from the following sources:

- Web of Science
- Oxford Academic Journals
- Pubmed NIH
- Ishiyaku
- J Stage
- Cinii articles
- Ichushi Web – JAMAS
- Science Direct
- Wiley Online Journals
- JAMA Network
- British Medical Journal
- Mary Ann Liebert
- New England Journal of Medicine
- Sage Publications
- Taylor and Francis Online
- Springer Link
- Biomed Central
- MDPI
- ASM
- PLOS
- The Lancet
- Cell Press
- Cell Press Search Interface
- EMBASE
- KoreaMed

- Global Index Medics
- MMWR
- Epidemiology and Health
- American Chemical Society
- Eurosurveillance
- Cambridge Press
- LWW
- Airiti
- JIMR
- Emerging Infectious Diseases
- Osong Public Health & Research Perspectives
- BASE Bielefeld
- LitCOVID

An additional step using the following search terms was added to the WHO search from 12<sup>th</sup> May 2020

tw:(newborn\* OR mother\* OR bab\* OR wom\* OR pregnan\* OR postpart\* OR neonat\* OR fetus OR fetal OR newborn OR mother OR bab\*)

### Appendix 3. Characteristics of cohort studies included in the systematic review of COVID-19 in pregnancy and postpartum

| Author, Year                | Study Design         | Population                         |               | Exposure                                                                                                                                                                                                         | Risk factors                                                                                      | Outcomes                         |                                                                                                                                                                                                                                                                                                      |                                                                                                                    |
|-----------------------------|----------------------|------------------------------------|---------------|------------------------------------------------------------------------------------------------------------------------------------------------------------------------------------------------------------------|---------------------------------------------------------------------------------------------------|----------------------------------|------------------------------------------------------------------------------------------------------------------------------------------------------------------------------------------------------------------------------------------------------------------------------------------------------|--------------------------------------------------------------------------------------------------------------------|
|                             |                      | No. of mothers                     | No. of babies |                                                                                                                                                                                                                  |                                                                                                   | Inclusion and exclusion criteria | Diagnosis of COVID-19                                                                                                                                                                                                                                                                                | Maternal                                                                                                           |
| ROUNDS 1-2                  |                      |                                    |               |                                                                                                                                                                                                                  |                                                                                                   |                                  |                                                                                                                                                                                                                                                                                                      |                                                                                                                    |
| Blitz M, 2020<br>USA        | Prospective cohort   | 3385 women                         |               | All women of reproductive age (defined as between 15-49 years) admitted and tested at 7 hospitals.                                                                                                               | Mothers diagnosed with nasopharyngeal swabs on admission, during hospital stay or after delivery. | Age, pregnant                    | COVID-related: admission to ICU                                                                                                                                                                                                                                                                      |                                                                                                                    |
|                             |                      | 82 mothers with confirmed COVID-19 |               | Testing carried out on symptomatic patients.<br><br>Two groups<br>1) Pregnant women with confirmed COVID-19<br>2) Non-pregnant women with confirmed COVID-19<br><br>Patients with incomplete data were excluded. |                                                                                                   |                                  |                                                                                                                                                                                                                                                                                                      |                                                                                                                    |
| Breslin N (2), 2020<br>USA* | Retrospective cohort | 43 women                           | 18            | All women attending the Labour and Delivery Triage Unit and tested.                                                                                                                                              | Mothers and newborns were diagnosed by nasopharyngeal swabs.                                      | Any symptom                      | COVID-related: pneumonia, oxygenation, admission to hospital and ICU, acute renal injury<br><br>Pregnancy-related: preterm and term birth, spontaneous and induced labour, mode of delivery - caesarean section and vaginal, pregnancy-induced hypertension, pre-labour rupture of membranes at term | Admission to NICU, neonatal sepsis, Apgar scores at 1 and 5 minutes, respiratory distress, congenital malformation |

|                             |                      |                                                                                                             |    |                                                                                                                 |                                                                                                                                                                                                                                                                  |                                                                                                            |                                                                                                                                                                                                        |                                                                                                                                      |
|-----------------------------|----------------------|-------------------------------------------------------------------------------------------------------------|----|-----------------------------------------------------------------------------------------------------------------|------------------------------------------------------------------------------------------------------------------------------------------------------------------------------------------------------------------------------------------------------------------|------------------------------------------------------------------------------------------------------------|--------------------------------------------------------------------------------------------------------------------------------------------------------------------------------------------------------|--------------------------------------------------------------------------------------------------------------------------------------|
| Cao D, 2020<br>China*       | Retrospective cohort | 10 women<br><br>10 mothers with confirmed COVID-19                                                          | 11 | All pregnant women admitted and tested.                                                                         | Mothers were diagnosed by throat swabs. Some newborns were diagnosed by throat swabs within 24 hours of birth.<br><br>Followed diagnostic criteria according to National Health Commission of China.                                                             | Age, preeclampsia, gestational diabetes, multiple pregnancy, trimester<br><br>Fever, cough, breathlessness | COVID-related: all-cause mortality, invasive ventilation<br><br>Pregnancy-related: preterm birth, mode of delivery – caesarean-section and vaginal, preterm rupture of membranes, gestational diabetes | Neonatal death, neonatal asphyxia, foetal distress, birthweight, gestational age at delivery, Apgar scores at 1 minute and 5 minutes |
| Chen L, 2020<br>China       | Retrospective cohort | 118 women<br><br>118 mothers with suspected or confirmed COVID-19<br><br>84 mothers with confirmed COVID-19 | 70 | All laboratory-confirmed and clinically diagnosed pregnant women admitted at all hospitals in Wuhan.            | Followed diagnostic criteria according to National Health Commission of China.<br><br>Laboratory-confirmed women were diagnosed by RT-PCR.<br><br>Clinically diagnosed women diagnosed by chest CT imaging.<br><br>Some newborns were diagnosed by throat swabs. | Age, parity, fever, cough, breathlessness, any symptom                                                     | COVID-related: all-cause mortality, non-invasive ventilation<br><br>Pregnancy-related: miscarriage, induced abortion, induced labour, preterm birth, mode of delivery – caesarean section and vaginal  | Neonatal death, neonatal asphyxia, Apgar score at 1 minute                                                                           |
| Ferrazzi E, 2020<br>Italy * | Prospective cohort   | 42 women<br><br>42 mothers with confirmed                                                                   | 42 | All women who were admitted for delivery and tested.<br><br>Women with positive tests before delivery, 36 hours | Mother and newborns were diagnosed by throat swabs.<br><br>Followed diagnostic criteria                                                                                                                                                                          | Parity, gestational diabetes, fever, cough, breathlessness, myalgia, lymphopenia,                          | COVID-related: pneumonia, oxygenation, admission to ICU<br><br>Pregnancy-related: preterm and term                                                                                                     | Admission to NICU, Apgar scores at 5 minutes, birthweight                                                                            |



|                        |                      |                                                                                                           |    |                                                                        |                                                                                                                                                                                                                                                                                                                         |                        |                                                                                                                                                                                                                                                      |
|------------------------|----------------------|-----------------------------------------------------------------------------------------------------------|----|------------------------------------------------------------------------|-------------------------------------------------------------------------------------------------------------------------------------------------------------------------------------------------------------------------------------------------------------------------------------------------------------------------|------------------------|------------------------------------------------------------------------------------------------------------------------------------------------------------------------------------------------------------------------------------------------------|
|                        |                      | COVID-19                                                                                                  |    | after delivery and those who delivered during the study were included. | according to Italian National Procedures.                                                                                                                                                                                                                                                                               | raised CRP, raised WCC | birth, gestational diabetes, mode of delivery – caesarean section and vaginal, spontaneous and induced labour, postpartum haemorrhage                                                                                                                |
| Khalil A, 2020 UK      | Prospective cohort   | 129 women<br><br>9 mothers with confirmed COVID-19                                                        | 9  | All pregnant women admitted were universally screened.                 | Mothers were diagnosed by nasopharyngeal swabs.                                                                                                                                                                                                                                                                         | Asthma, ethnicity      | COVID-related: admission to hospital, length of stay                                                                                                                                                                                                 |
| Khan S (1), 2020 China | Retrospective cohort | 17 women<br><br>17 mothers with suspected or confirmed COVID-19<br><br>12 mothers with confirmed COVID-19 | 17 | All pregnant women admitted and diagnosed with COVID-19 pneumonia.     | Followed diagnostic criteria according to New Coronavirus Pneumonia Prevention and Control Program.<br><br>Laboratory-confirmed women were diagnosed by throat swabs.<br><br>Clinically diagnosed women were diagnosed by CT imaging.<br><br>Newborns were diagnosed by throat swabs collected straight after delivery. |                        | COVID-related: admission to hospital<br><br>Pregnancy-related: preterm birth, mode of delivery – caesarean section, preterm rupture of membranes<br><br>Neonatal death, stillbirth, neonatal pneumonia, birthweight, Apgar scores at 1 and 5 minutes |

|                         |                      |                                                                                                            |    |                                                                                                                                                                                                                                                                                                                                                             |                                                                                                                                                                                                                                                                                                 |                                     |                                                                                                                                                                                                                                                                     |                                                                                                                                                                                   |
|-------------------------|----------------------|------------------------------------------------------------------------------------------------------------|----|-------------------------------------------------------------------------------------------------------------------------------------------------------------------------------------------------------------------------------------------------------------------------------------------------------------------------------------------------------------|-------------------------------------------------------------------------------------------------------------------------------------------------------------------------------------------------------------------------------------------------------------------------------------------------|-------------------------------------|---------------------------------------------------------------------------------------------------------------------------------------------------------------------------------------------------------------------------------------------------------------------|-----------------------------------------------------------------------------------------------------------------------------------------------------------------------------------|
| Li N, 2020<br>China*    | Retrospective cohort | 276 women<br><br>34 mothers with suspected or confirmed COVID-19<br><br>16 mothers with confirmed COVID-19 | 36 | All women admitted to labour and tested during study period.<br><br>Two case groups<br>1) Women with confirmed COVID-19<br>2) Women with suspected COVID-19<br><br>Women aged between 25-35 years randomly selected from records.<br><br>Two control groups<br>3) Women admitted during study period<br>4) Women admitted at a similar time of year in 2019 | Followed diagnostic criteria according to National Health Commission of China.<br><br>Laboratory-confirmed women were diagnosed by throat swabs.<br><br>Clinically diagnosed women were diagnosed by chest CT imaging with negative swabs.<br><br>Some newborns were diagnosed by throat swabs. | Any comorbidity, multiple pregnancy | COVID-related: admission to hospital and ICU, length of hospital stay, oxygenation<br><br>Pregnancy-related: preterm delivery, mode of delivery – caesarean section and vaginal, gestational diabetes, preterm rupture of membranes, pregnancy-induced hypertension | Neonatal death, neonatal asphyxia, foetal distress, gestational age at delivery, birthweight – low birth weight defined as less than 2 500 grams, Apgar scores at 1 and 5 minutes |
| Liao J, 2020<br>China * | Retrospective cohort | 63 women<br><br>10 mothers with suspected or confirmed COVID-19                                            | 10 | Any women admitted and delivered vaginally.<br><br>Two groups<br>1) Women with clinical diagnosis of COVID-19 on obstetric isolation ward.<br>2) Women without COVID-19 on general ward.                                                                                                                                                                    | Mothers were diagnosed clinically with laboratory results and CT imaging – no throat swab tested.<br><br>Followed diagnostic criteria according to National Health Commission of China.<br><br>Isolated newborns tested with throat swabs.                                                      | Age, parity, trimester              | Pregnancy-related: preterm birth, premature rupture of membranes, mode of delivery – vaginal, postpartum haemorrhage                                                                                                                                                | Neonatal death, neonatal asphyxia, gestational age at delivery, birthweight, admission to NICU                                                                                    |

|                           |                      |                                                                                                       |    |                                                                                                                                                                                                                                                                                                              |                                                                                                                                                                                                                                                                     |                                                                                  |                                                                                                                                                                                                                                                        |                                                                                                         |
|---------------------------|----------------------|-------------------------------------------------------------------------------------------------------|----|--------------------------------------------------------------------------------------------------------------------------------------------------------------------------------------------------------------------------------------------------------------------------------------------------------------|---------------------------------------------------------------------------------------------------------------------------------------------------------------------------------------------------------------------------------------------------------------------|----------------------------------------------------------------------------------|--------------------------------------------------------------------------------------------------------------------------------------------------------------------------------------------------------------------------------------------------------|---------------------------------------------------------------------------------------------------------|
| Liu F, 2020<br>China      | Prospective cohort   | 40 women<br>21 mothers with confirmed COVID-19                                                        | 17 | Any women admitted who was tested and with complete clinical and CT data.<br><br>Two groups:<br>1) Pregnant women with confirmed COVID-19<br>2) Age-matched non-pregnant women with confirmed COVID-19<br><br>Cases with poor image quality for assessment or infection with another pathogen were excluded. | Mothers were diagnosed with throat swabs. RT-PCR tests carried out according to WHO guideline.<br><br>Newborns were tested by RT-PCRs.                                                                                                                              | Age, fever, cough, breathlessness, lymphopenia, raised CRP, raised WCC, pregnant | COVID-related:<br>ventilation, admission to hospital and ICU<br><br>Pregnancy-related:<br>preterm and term birth, gestational diabetes, mode of delivery – caesarean section and vaginal, preterm rupture of membranes, pregnancy-induced hypertension | Neonatal death, neonatal asphyxia, neonatal pneumonia, foetal distress, Apgar scores at 1 and 5 minutes |
| Liu F (1), 2020<br>China  | Retrospective cohort | 44 women<br>44 mothers with suspected or confirmed COVID-19<br><br>16 mothers with confirmed COVID-19 | 8  | All pregnant women admitted with COVID-19.                                                                                                                                                                                                                                                                   | Followed diagnostic criteria according to National Health Commission of China<br><br>Confirmed women were diagnosed by RT-PCRs.<br><br>Suspected women were diagnosed by typical chest CT imaging of COVID-19 pneumonia.<br><br>Newborns were diagnosed by RT-PCRs. |                                                                                  | COVID-related:<br>pneumonia<br><br>Pregnancy-related:<br>preterm rupture of membranes                                                                                                                                                                  |                                                                                                         |
| Liu W (2), 2020<br>China* | Retrospective cohort | 19 women<br>19 mothers with suspected or confirmed                                                    | 19 | All women clinically diagnosed or laboratory-confirmed during late pregnancy and delivered.                                                                                                                                                                                                                  | Followed diagnostic criteria according to Coronavirus Pneumonia Prevention and Control Chinese Program.                                                                                                                                                             | Age, trimester, any symptom, cough, fever                                        | Pregnancy-related:<br>mode of delivery – caesarean section and vaginal, preterm rupture of membranes                                                                                                                                                   | Admission to NICU, gestational age at delivery, birthweight, Apgar scores at 1 and 5 minutes            |

|                      |                      |                                                |    |                                                                                             |                                                                                                                                                            |                                                                                                                                                                                                                                                                                                                                                                                                                             |                                                                                                                                                                                                                             |  |
|----------------------|----------------------|------------------------------------------------|----|---------------------------------------------------------------------------------------------|------------------------------------------------------------------------------------------------------------------------------------------------------------|-----------------------------------------------------------------------------------------------------------------------------------------------------------------------------------------------------------------------------------------------------------------------------------------------------------------------------------------------------------------------------------------------------------------------------|-----------------------------------------------------------------------------------------------------------------------------------------------------------------------------------------------------------------------------|--|
|                      |                      | COVID-19                                       |    |                                                                                             | 10 mothers with confirmed COVID-19                                                                                                                         | <p>Clinically diagnosed women had a fever and/or respiratory symptom, radiological signs of viral pneumonia, low/normal white cell count or low lymphocyte count and no improvement after treatment for 3 days.</p> <p>Laboratory-confirmed women had a positive RT-PCR or matched genetic sequence for SARS-CoV-2.</p> <p>Newborns were tested by RT-PCR on throat swabs, gastric fluid after birth, urine and faeces.</p> |                                                                                                                                                                                                                             |  |
| Nie R, 2020<br>China | Retrospective cohort | 33 women<br>33 mothers with confirmed COVID-19 | 28 | All consecutive pregnant women diagnosed with COVID-19 at five hospitals in Hubei province. | <p>Followed the diagnostic criteria according to National Health Commission of China.</p> <p>Some mothers and newborns were diagnosed by throat swabs.</p> | <p>COVID-related: all-cause mortality, pneumonia, non-invasive and invasive ventilation, oxygenation, acute respiratory distress syndrome, admission to ICU</p> <p>Pregnancy-related: induced abortion, preterm birth, mode of delivery – caesarean section and vaginal, preterm-</p>                                                                                                                                       | Neonatal death, foetal distress, neonatal pneumonia, admission to NICU, birthweight – low birth weight defined as less than 2 500 grams and very low birth weight defined as less than 1 500 grams, Apgar scores at 1 and 5 |  |

|                             |                    |                                                                                                   |    |                                                                                                                                                                                                                                  |                                                                           |                                                                                                                                                                                                                                                                                                                                                                                                                                                                                                                                                                                    |                                                                                                                                              |
|-----------------------------|--------------------|---------------------------------------------------------------------------------------------------|----|----------------------------------------------------------------------------------------------------------------------------------------------------------------------------------------------------------------------------------|---------------------------------------------------------------------------|------------------------------------------------------------------------------------------------------------------------------------------------------------------------------------------------------------------------------------------------------------------------------------------------------------------------------------------------------------------------------------------------------------------------------------------------------------------------------------------------------------------------------------------------------------------------------------|----------------------------------------------------------------------------------------------------------------------------------------------|
|                             |                    |                                                                                                   |    |                                                                                                                                                                                                                                  |                                                                           | premature rupture of membranes, gestational diabetes, pregnancy-induced hypertension                                                                                                                                                                                                                                                                                                                                                                                                                                                                                               | minute, gestational age at delivery – defined either as less than 37 weeks or more than/equal to 37 weeks, respiratory distress syndrome     |
| Pierce-Williams R, 2020 USA | Prospective cohort | 64 women<br>64 mothers with suspected or confirmed COVID-19<br>63 mothers with confirmed COVID-19 | 33 | All laboratory-confirmed pregnant and postpartum women admitted to 12 US hospitals with severe or critical COVID-19.<br><br>Cases with unclear or negative tests, and women diagnosed more than 7 days postpartum were excluded. | Mothers were diagnosed by nasopharyngeal swabs or bronchoalveolar lavage. | COVID-related: all-cause mortality, respiratory failure, acute respiratory distress syndrome, acute cardiac injury, oxygenation, non-invasive and invasive ventilation, length of hospital stay<br><br>Pregnancy-related: preterm birth (less than 34 weeks and 37 weeks), mode of delivery – caesarean section and vaginal, pregnancy-induced hypertension, postpartum haemorrhage – defined as blood loss more than 1 000 cc at time of delivery or symptomatic hypovolemia within 24 hours associated with blood loss, chorioamnionitis, preterm-premature rupture of membranes | Stillbirth, neonatal death, admission to NICU, foetal growth restriction, birthweight, gestational age at delivery, Apgar score at 5 minutes |

|                             |                      |                                                                                                  |                                                                                                                                                                                                                |                                                                                                                                                                                                                                                         |               |                                                                                                                                                                                                                                     |                                                                                                                                                                                       |
|-----------------------------|----------------------|--------------------------------------------------------------------------------------------------|----------------------------------------------------------------------------------------------------------------------------------------------------------------------------------------------------------------|---------------------------------------------------------------------------------------------------------------------------------------------------------------------------------------------------------------------------------------------------------|---------------|-------------------------------------------------------------------------------------------------------------------------------------------------------------------------------------------------------------------------------------|---------------------------------------------------------------------------------------------------------------------------------------------------------------------------------------|
| Qiancheng X, 2020<br>China* | Retrospective cohort | 82 women<br>23<br>28 mothers with confirmed COVID-19                                             | All patients consecutively admitted with COVID-19 diagnosis.<br><br>The study included pregnant women and non-pregnant women of reproductive age (defined as 18-41 years).<br><br>Male patients were excluded. | Mothers were diagnosed by RT-PCR on respiratory samples or IgM serological test for SARS-CoV-2. Followed diagnostic criteria according to National Health Commission of China.<br><br>Newborns tested twice by RT-PCR for SARS-CoV-2 24-48 hours apart. | Age, pregnant | COVID-related: mortality, pneumonia, severe admission to hospital<br><br>Pregnancy-related: induced abortion, preterm birth, gestational diabetes, mode of delivery – caesarean section and vaginal, pregnancy-induced hypertension | Stillbirth, neonatal death, neonatal asphyxia, neonatal pneumonia, admission to NICU, birthweight – low birthweight defined as less than 2 500 grams, Apgar scores at 1 and 5 minutes |
| Sutton D, 2020<br>USA       | Prospective cohort   | 215 women<br>33 mothers with confirmed COVID-19                                                  | All women admitted for delivery and tested.                                                                                                                                                                    | Mothers were diagnosed by nasopharyngeal swabs.                                                                                                                                                                                                         | Any symptom   |                                                                                                                                                                                                                                     |                                                                                                                                                                                       |
| Tassis B, 2020 Italy        | Prospective cohort   | 139 women<br>6 mothers with suspected or confirmed COVID-19<br>3 mothers with confirmed COVID-19 | All women admitted and tested.                                                                                                                                                                                 | Mothers were diagnosed by nasopharyngeal swabs.                                                                                                                                                                                                         |               |                                                                                                                                                                                                                                     |                                                                                                                                                                                       |

|                           |                      |                                                       |     |                                                                                                                                                                                                        |                                                                                                                                                                                                                    |                                                                                                                                 |                                                                                                                                                                                                           |                                                                                                                                                                                                                                                                                                                                                 |
|---------------------------|----------------------|-------------------------------------------------------|-----|--------------------------------------------------------------------------------------------------------------------------------------------------------------------------------------------------------|--------------------------------------------------------------------------------------------------------------------------------------------------------------------------------------------------------------------|---------------------------------------------------------------------------------------------------------------------------------|-----------------------------------------------------------------------------------------------------------------------------------------------------------------------------------------------------------|-------------------------------------------------------------------------------------------------------------------------------------------------------------------------------------------------------------------------------------------------------------------------------------------------------------------------------------------------|
| UKOSS, 2020<br>UK#§       | Prospective cohort   | 1121 women<br><br>427 mothers with confirmed COVID-19 | 247 | All pregnant women admitted and tested in all hospitals and obstetrics units in UK.<br><br>Testing carried out on symptomatic women.<br><br>Comparison cohort of pregnant women from 2017-18 was used. | Mothers were all laboratory-confirmed.<br><br>Some newborns were diagnosed by SARS-CoV-2 RNA (at less than 12 hours of age or more than/equal to 12 hours).                                                        | Age, BMI, ethnicity, smoking, asthma, hypertension, diabetes, parity, multiple pregnancy, gestational diabetes, any comorbidity | COVID-related: COVID-specific mortality, admission to hospital and ICU<br><br>Pregnancy-related: preterm birth, mode of delivery – caesarean section, vaginal and operative vaginal, gestational diabetes | Stillbirth, miscarriage, neonatal death, admission to NICU                                                                                                                                                                                                                                                                                      |
| Vintzileos W, 2020<br>USA | Retrospective cohort | 161 women<br><br>32 mothers with confirmed COVID-19   | 29  | All women admitted to labour and delivery and tested.<br><br>Testing for all admitted patients.                                                                                                        | Mothers and newborns were diagnosed by nasopharyngeal swabs.                                                                                                                                                       | Any symptom                                                                                                                     |                                                                                                                                                                                                           |                                                                                                                                                                                                                                                                                                                                                 |
| Wu Y, 2020<br>China*      | Prospective cohort   | 13 women<br><br>13 mothers with confirmed COVID-19    | 5   | All pregnant women admitted and tested.                                                                                                                                                                | Followed diagnostic criteria according to National Health Commission of China.<br><br>Mothers were diagnosed by throat swabs. Newborns were diagnosed by throat and anal swabs on first and third day after birth. | Trimester, age, parity, BMI, breathlessness, any symptom, cough, fever, raised CRP, abnormal LFT, lymphopenia                   | COVID-related: pneumonia, oxygenation, admission to ICU<br><br>Pregnancy-related: miscarriage, preterm birth, mode of delivery – caesarean section and vaginal, preterm rupture of membranes              | Stillbirth, neonatal death, neonatal asphyxia, neonatal pneumonia, foetal distress, birthweight – low birth weight defined as less than 2 500 grams, small-for-gestational age – defined as less than 10 <sup>th</sup> percentile, large-for-gestational age – defined as more than 90 <sup>th</sup> percentile, Apgar scores at 1 and 5 minute |

|                        |                      |                                                                                                             |    |                                                                                                                                                                                                                                                                                                                                         |                                                                                                                                                                                                                                                                                                                                           |                                                                                                                                                                             |                                                                                                                                                                                                                                                                                                                                                                    |                                                                                                                                                             |
|------------------------|----------------------|-------------------------------------------------------------------------------------------------------------|----|-----------------------------------------------------------------------------------------------------------------------------------------------------------------------------------------------------------------------------------------------------------------------------------------------------------------------------------------|-------------------------------------------------------------------------------------------------------------------------------------------------------------------------------------------------------------------------------------------------------------------------------------------------------------------------------------------|-----------------------------------------------------------------------------------------------------------------------------------------------------------------------------|--------------------------------------------------------------------------------------------------------------------------------------------------------------------------------------------------------------------------------------------------------------------------------------------------------------------------------------------------------------------|-------------------------------------------------------------------------------------------------------------------------------------------------------------|
| Yan J, 2020<br>China*  | Retrospective cohort | 116 women<br><br>116 mothers with suspected or confirmed COVID-19<br><br>65 mothers with confirmed COVID-19 | 99 | All consecutive pregnant women laboratory-confirmed or with clinically diagnosed COVID-19 pneumonia from 25 hospitals inside and outside Hubei province.                                                                                                                                                                                | Followed diagnostic criteria according to National Health Commission of China.<br><br>Laboratory-confirmed women were tested by throat swabs. Clinically diagnosed women were those with symptoms, significant history and CT imaging.<br><br>Newborns tested by throat swabs straight after delivery in operating room or delivery room. | Age, trimester, parity, gestational diabetes, preeclampsia, pregnancy hypertension, fever, cough, breathlessness, myalgia, any symptom, lymphopenia, raised CRP, raised WCC | COVID-related: all-cause mortality, severe, pneumonia, non-invasive and invasive ventilation, oxygenation, admission to ICU, length of ICU stay, hypo-proteinemia<br><br>Pregnancy-related: miscarriage, preterm birth (< 34 weeks and < 37 weeks), preterm-premature rupture of membranes, gestational diabetes, mode of delivery – caesarean section and vaginal | Stillbirth, neonatal death, neonatal asphyxia, admission to NICU, foetal distress, gestational age at delivery, birthweight, Apgar score at 1 and 5 minutes |
| Yang H, 2020<br>China* | Retrospective cohort | 55 women with suspected or confirmed COVID-19<br><br>13 mothers with confirmed COVID-19                     | 57 | All suspected Chinese pregnant women admitted to an isolated suite and delivered.<br><br>Cases were screened based on pulmonary CT scan, routine bloods laboratory tests and signs/symptoms.<br><br>Two groups<br>1) Women with confirmed COVID-19<br>2) Women without COVID-19<br><br>Non-Chinese or non-pregnant women were excluded. | Laboratory-confirmed women were diagnosed by throat swabs.<br><br>Newborns were diagnosed by throat swabs 24 hours after birth.                                                                                                                                                                                                           | Age, BMI, lymphopenia, gestational age, raised CRP                                                                                                                          | Pregnancy-related: preterm-premature rupture of membranes, mode of delivery – caesarean section and vaginal                                                                                                                                                                                                                                                        | Gestational age at delivery, admission to NICU, congenital malformation, respiratory distress syndrome, birthweight                                         |



|                       |                      |                                                                                                                 |                                                                                                                                                                                                                                                                                       |                                                                                                                                                                                                                                                                                                                                             |                                                                                                              |                                                                                                                                                                                                                                                                                                                                                                               |                                                                                                                                                                                                      |
|-----------------------|----------------------|-----------------------------------------------------------------------------------------------------------------|---------------------------------------------------------------------------------------------------------------------------------------------------------------------------------------------------------------------------------------------------------------------------------------|---------------------------------------------------------------------------------------------------------------------------------------------------------------------------------------------------------------------------------------------------------------------------------------------------------------------------------------------|--------------------------------------------------------------------------------------------------------------|-------------------------------------------------------------------------------------------------------------------------------------------------------------------------------------------------------------------------------------------------------------------------------------------------------------------------------------------------------------------------------|------------------------------------------------------------------------------------------------------------------------------------------------------------------------------------------------------|
| Yin M, 2020<br>China  | Retrospective cohort | 66 women<br>17<br><br>31 mothers with confirmed COVID-19                                                        | All women of childbearing age (defined as between 20-40 years) admitted and tested.<br><br>Two groups<br>1) Pregnant women with confirmed COVID-19<br>2) Non-pregnant women with confirmed COVID-19<br><br>Two cases were excluded due to cancer (one cervical cancer, one lymphoma). | Mothers were diagnosed by throat swabs upon admission. Newborns were diagnosed by throat and anal swabs straight after delivery.<br><br>Followed diagnostic criteria according to National Health Commission of China.                                                                                                                      | Fever, cough, breathlessness, myalgia, lymphopenia, d-dimers, abnormal LFT, raised CRP, raised WCC, pregnant | COVID-related: pneumonia, severe pneumonia – defined as the disease when the respiratory rate is equal or greater than 30 per minute, oxygen saturation is less than or equal 93% at rest or when PaO2 is less than or equal to 300 mmHg, length of hospital stay<br><br>Pregnancy-related: induced abortion, preterm birth, mode of delivery – caesarean section and vaginal | Stillbirth, neonatal death, neonatal asphyxia, congenital malformation, gestational age at delivery, birthweight – low birthweight defined as less than 2 500 grams, Apgar scores at 1 and 5 minutes |
| Yue L, 2020<br>China* | Retrospective cohort | 30 women<br>32<br><br>30 mothers with suspected or confirmed COVID-19<br><br>14 mothers with confirmed COVID-19 | All women admitted for scheduled or emergency caesarean section and were tested.                                                                                                                                                                                                      | Followed diagnostic criteria according to National Health Commission of China.<br><br>Laboratory-confirmed women were diagnosed by RT-PCR tests.<br><br>Clinically diagnosed women were diagnosed by fulfilling at least two points of the criteria (exposure history, fever, lymphopenia or low white cell count, typical chest CT imaging | Gestational age                                                                                              | COVID-related: pneumonia, respiratory failure, acute respiratory distress syndrome, length of hospital stay<br><br>Pregnancy-related: preterm birth, mode of delivery – caesarean section, wound infection, postpartum haemorrhage                                                                                                                                            | Foetal distress, birthweight – low birth weight defined as less than 2 500 grams, respiratory distress syndrome, Apgar scores at 1 and 5 minutes                                                     |

|                         |                      |                                                     |    |                                                                                                                                                                                                                                               |                                                                                                                                                                                                                      |                          |                                                                                                                                                                |                                                                                                                                                                                         |
|-------------------------|----------------------|-----------------------------------------------------|----|-----------------------------------------------------------------------------------------------------------------------------------------------------------------------------------------------------------------------------------------------|----------------------------------------------------------------------------------------------------------------------------------------------------------------------------------------------------------------------|--------------------------|----------------------------------------------------------------------------------------------------------------------------------------------------------------|-----------------------------------------------------------------------------------------------------------------------------------------------------------------------------------------|
|                         |                      |                                                     |    |                                                                                                                                                                                                                                               |                                                                                                                                                                                                                      |                          |                                                                                                                                                                | of COVID-19 infection).                                                                                                                                                                 |
| Zeng L, 2020<br>China   | Retrospective cohort | 33 women<br><br>33 mothers with confirmed COVID-19  | 33 | All neonates born to mothers with COVID-19 at the hospital.                                                                                                                                                                                   | Newborns were diagnosed by nasopharyngeal and anal swabs.<br><br>Followed diagnostic criteria according to National Health Commission and Chinese Perinatal-Neonatal SARS-CoV-2 Committee.                           | Fever, cough             | COVID-related: pneumonia, admission to ICU<br>Pregnancy-related: preterm birth, mode of delivery – caesarean section and vaginal, preterm rupture of membranes | Stillbirth, neonatal death, neonatal asphyxia, small-for-gestational age, neonatal pneumonia, admission to NICU, length of stay in NICU, neonatal sepsis, respiratory distress syndrome |
| ROUND 3                 |                      |                                                     |    |                                                                                                                                                                                                                                               |                                                                                                                                                                                                                      |                          |                                                                                                                                                                |                                                                                                                                                                                         |
| Bianco A, 2020<br>USA*  | Prospective cohort   | 301 women<br><br>24 mothers with confirmed COVID-19 | 24 | All pregnant women scheduled for a planned delivery.<br><br>Women and designated support persons were screened by a telephone screening tool for COVID-19. All women and screen-negative support persons were tested one day before delivery. | Mothers and support persons were diagnosed by nasopharyngeal swabs.<br><br>Newborns were diagnosed by nasopharyngeal swabs at 24 hours of life. If the test was negative, the swab was repeated at 48 hours of life. | Age, ethnicity, parity   |                                                                                                                                                                |                                                                                                                                                                                         |
| Campbell K, 2020<br>USA | Prospective cohort   | 770 women<br><br>30 mothers with confirmed          | 30 | All women admitted for childbirth were screened for COVID-19 consisting of questions related to travel, contacts and symptoms.                                                                                                                | Mothers were diagnosed by nasopharyngeal swabs.<br><br>Newborns were diagnosed by                                                                                                                                    | Age, parity, any symptom | Pregnancy-related: mode of delivery – caesarean section                                                                                                        | Birthweight, Apgar scores at 1 and 5 minutes                                                                                                                                            |

|                           |                      |                                                                   |    |                                                                                                                                                                                                                              |                                                                                                                                                                                                 |                                                                                                                                     |                                                                                                                                                                                                                    |                                                                                                                                                                |
|---------------------------|----------------------|-------------------------------------------------------------------|----|------------------------------------------------------------------------------------------------------------------------------------------------------------------------------------------------------------------------------|-------------------------------------------------------------------------------------------------------------------------------------------------------------------------------------------------|-------------------------------------------------------------------------------------------------------------------------------------|--------------------------------------------------------------------------------------------------------------------------------------------------------------------------------------------------------------------|----------------------------------------------------------------------------------------------------------------------------------------------------------------|
|                           |                      | COVID-19                                                          |    | Testing was carried out on women without a previous diagnosis of COVID-19.                                                                                                                                                   | nasopharyngeal swabs at 24 hours of age.                                                                                                                                                        |                                                                                                                                     |                                                                                                                                                                                                                    |                                                                                                                                                                |
|                           |                      |                                                                   |    | Women diagnosed with COVID-19 before admission and those considered recovered (defined as more than or equal to 14 days from onset of symptoms and more than or equal to 72 hours afebrile) were not tested.                 |                                                                                                                                                                                                 |                                                                                                                                     |                                                                                                                                                                                                                    |                                                                                                                                                                |
| Ceulemans D, 2020 Belgium | Retrospective cohort | 470 women<br><br>13 mothers with confirmed COVID-19               |    | All consecutive pregnant women admitted for delivery at four obstetrical units. Universal screening was carried out with almost all women tested.                                                                            | Mothers were diagnosed by RT-PCRs.                                                                                                                                                              |                                                                                                                                     |                                                                                                                                                                                                                    | COVID-related: all-cause mortality, severe pneumonia, admission to ICU                                                                                         |
| Cheng B, 2020 China       | Retrospective cohort | 111 women<br><br>31 mothers with confirmed COVID-19               | 17 | All women of childbearing age (defined as between 22-41 years) with confirmed COVID-19 admitted to hospital.<br><br>Two groups<br>1) Pregnant women with confirmed COVID-19<br>2) Non-pregnant women with confirmed COVID-19 | Mothers and newborns were diagnosed by nasal and throat swabs or serology IgM/IgG testing for SARS-CoV-2.<br><br>Followed diagnostic criteria according to National Health Commission of China. | Age, diabetes, any comorbidity, fever, cough, breathlessness, myalgia, any symptom, lymphopenia, abnormal LFT, raised CRP, d-dimers | COVID-related: all-cause mortality, pneumonia, severe pneumonia, acute respiratory distress syndrome, oxygenation, invasive and non-invasive ventilation, admission to ICU<br><br>Pregnancy-related: preterm birth | Neonatal death, neonatal asphyxia, birthweight, Apgar scores at 1 minute and 5 minute, congenital malformation, gestational age at delivery, admission to NICU |
| Dong Y, 2020 China        | Retrospective cohort | 103 women<br><br>103 mothers with suspected or confirmed COVID-19 |    | All laboratory-confirmed and clinically diagnosed pregnant women in China reported to the Chinese CDC.                                                                                                                       | Followed diagnostic criteria according to National Health Commission of China.<br><br>Laboratory-confirmed women were diagnosed by                                                              | Age                                                                                                                                 |                                                                                                                                                                                                                    | COVID-related: all-cause mortality, pneumonia, severe pneumonia                                                                                                |

|                        |                      |                                                                                                           |    |                                                                                                                                                                                                                                                                      |                                                                                                                                       |                                                                             |                                                                                                                                                                   |                                                                         |
|------------------------|----------------------|-----------------------------------------------------------------------------------------------------------|----|----------------------------------------------------------------------------------------------------------------------------------------------------------------------------------------------------------------------------------------------------------------------|---------------------------------------------------------------------------------------------------------------------------------------|-----------------------------------------------------------------------------|-------------------------------------------------------------------------------------------------------------------------------------------------------------------|-------------------------------------------------------------------------|
|                        |                      | 81 mothers with confirmed COVID-19                                                                        |    |                                                                                                                                                                                                                                                                      | throat swabs.<br><br>Clinically-diagnosed women were diagnosed by clinical symptoms and exposures.                                    |                                                                             |                                                                                                                                                                   |                                                                         |
| Doria M, 2020 Portugal | Prospective cohort   | 103 women<br><br>12 mothers with confirmed COVID-19                                                       | 11 | All pregnant women admitted were universally screened.                                                                                                                                                                                                               | Mothers were laboratory-confirmed (method of diagnosis is unclear).<br><br>Newborns were diagnosed by RT-PCRs.                        | Age, trimester, asthma, any comorbidity, pregnant hypertension, any symptom | Pregnancy-related: mode of delivery – caesarean section and vaginal, preterm-premature rupture of membranes, gestational diabetes, pregnancy-induced hypertension | Apgar scores at 1 and 5 minutes, birthweight, foetal growth restriction |
| Duffy C, 2020 USA      | Retrospective cohort | 37 women<br><br>37 mothers with suspected or confirmed COVID-19<br><br>15 mothers with confirmed COVID-19 |    | All pregnant women admitted and screened by white blood cell count differential testing.<br><br>COVID-19 testing carried out only for women with lymphopenia (defined as absolute lymphocyte count less than $0.8 \times 10^3$ / microlitre) or those with symptoms. | Mothers were diagnosed by nasopharyngeal swabs.                                                                                       | Lymphopenia                                                                 | COVID-related: admission to ICU                                                                                                                                   |                                                                         |
| Fox N, 2020 USA*       | Prospective cohort   | 757 women<br><br>92 mothers with suspected or confirmed                                                   |    | All pregnant women at one obstetrical practice were questioned for symptoms suggestive of COVID-19 or any sick contacts.<br><br>All women were included who were suspected or a positive RT-PCR test.                                                                | Women with suspected COVID-19 were defined as having at least 2 of the following symptoms (fever, cough, dyspnoea, malaise, anosmia). | Fever, breathlessness, cough, any symptom                                   | COVID-related: all-cause mortality, admission to hospital, oxygenation, invasive or non-invasive ventilation<br><br>Pregnancy-related: miscarriage                |                                                                         |

|                         |                      |                                                 |    |                                                                                                                                                                     |                                                                                   |                                                                                                      |                                                                                                      |
|-------------------------|----------------------|-------------------------------------------------|----|---------------------------------------------------------------------------------------------------------------------------------------------------------------------|-----------------------------------------------------------------------------------|------------------------------------------------------------------------------------------------------|------------------------------------------------------------------------------------------------------|
|                         |                      | COVID-19                                        |    | Testing was not carried out in all suspected women due to lack of availability in the community.                                                                    | Women with confirmed COVID-19 were diagnosed by nasopharyngeal swabs.             |                                                                                                      |                                                                                                      |
|                         |                      | 33 mothers with confirmed COVID-19              |    | Women with only sick contacts were excluded.                                                                                                                        | Newborns were not tested due to lack of availability.                             |                                                                                                      |                                                                                                      |
| Gagliardi L, 2020 Italy | Prospective cohort   | 533 women                                       |    | All pregnant women admitted for delivery at 6 hospitals were universally screened.                                                                                  | Mothers were diagnosed by nasopharyngeal swabs.                                   |                                                                                                      |                                                                                                      |
|                         |                      | 3 mothers with confirmed COVID-19               |    |                                                                                                                                                                     |                                                                                   |                                                                                                      |                                                                                                      |
| Liu P, 2020 China       | Retrospective cohort | 51 women                                        | 51 | All neonates born to mothers with COVID-19 were admitted to NICU isolation ward.                                                                                    | Mothers were clinically diagnosed or laboratory-confirmed (diagnosed by RT-PCRs). | COVID-related: all-cause mortality, pneumonia                                                        | Gestational age at delivery, birthweight, Apgar scores at 1 and 5 minutes, necrotising enterocolitis |
|                         |                      | 51 mothers with suspected or confirmed COVID-19 |    | Premature newborns (defined as gestational age less than 35 weeks), newborns with congenital malformations and those with incomplete laboratory data were excluded. | Newborns were diagnosed by throat swabs on days 0, 1 and 5 after birth.           | Pregnancy-related: mode of delivery – caesarean section and vaginal, preterm and term birth          |                                                                                                      |
|                         |                      | 7 mothers with confirmed COVID-19               |    |                                                                                                                                                                     | Followed diagnostic criteria according to National Health Commission of China.    |                                                                                                      |                                                                                                      |
| Lokken E, 2020 USA      | Retrospective cohort | 46 women                                        | 8  | All women aged 18 years or older with laboratory-confirmed COVID-19 identified from six hospital systems in Washington state.                                       | Mothers were diagnosed by RT-PCRs.                                                | COVID-related: pneumonia, respiratory failure, oxygenation, admission to hospital and ICU, length of | Stillbirth, foetal distress, gestational age at delivery                                             |
|                         |                      | 46 mothers with confirmed                       |    |                                                                                                                                                                     | Stillbirth was diagnosed by                                                       |                                                                                                      |                                                                                                      |

|                       |                      |                                                                                                             |    |                                                                                                                                                                                                                                                                                                                                                                                                  |                                                                                                                                      |                                                             |                                                                                                                                                                                                                                                                                    |            |
|-----------------------|----------------------|-------------------------------------------------------------------------------------------------------------|----|--------------------------------------------------------------------------------------------------------------------------------------------------------------------------------------------------------------------------------------------------------------------------------------------------------------------------------------------------------------------------------------------------|--------------------------------------------------------------------------------------------------------------------------------------|-------------------------------------------------------------|------------------------------------------------------------------------------------------------------------------------------------------------------------------------------------------------------------------------------------------------------------------------------------|------------|
|                       |                      | COVID-19                                                                                                    |    | <p>Women with confirmed COVID-19 during any trimester of pregnancy were included regardless of symptoms.</p> <p>Most women were tested due COVID-related symptoms. The rest were tested due to known exposure. (n = 3)</p>                                                                                                                                                                       | PCR post-mortem.                                                                                                                     |                                                             | <p>hospital and ICU stay</p> <p>Pregnancy-related: preterm and term birth, gestational diabetes, mode of delivery – caesarean section and vaginal, spontaneous and induced labour, pregnancy-induced hypertension</p>                                                              |            |
| London V, 2020<br>USA | Retrospective cohort | 156 women<br><br>156 mothers with suspected or confirmed COVID-19<br><br>68 mothers with confirmed COVID-19 | 48 | <p>All pregnant women admitted to antepartum and labour and delivery units.</p> <p>Testing was carried out for women screened for symptoms and exposure to patients with COVID-19 from 15 March to 10 April. All patients were tested after 10 April.</p> <p>Two groups<br/>1) Symptomatic women with confirmed COVID-19 (n = 46)<br/>2) Asymptomatic women with confirmed COVID-19 (n = 22)</p> | <p>Mothers were diagnosed by nasopharyngeal swabs.</p> <p>Most newborns were diagnosed by nasopharyngeal swabs on day 0 of life.</p> | Age, BMI, parity, any comorbidity, lymphopenia, any symptom | <p>COVID-related: all-cause mortality, oxygenation, invasive and non-invasive ventilation, length of hospital stay</p> <p>Pregnancy-related: preterm birth, mode of delivery – caesarean section, postpartum haemorrhage, pregnancy-induced hypertension, gestational diabetes</p> | Stillbirth |
| Miller E, 2020<br>USA | Prospective cohort   | 635 women<br><br>31 mothers with suspected or confirmed COVID-19<br><br>23 mothers with                     |    | All pregnant women admitted for delivery were universally screened.                                                                                                                                                                                                                                                                                                                              | Mothers were diagnosed by RT-PCRs.                                                                                                   | Any symptom                                                 |                                                                                                                                                                                                                                                                                    |            |

|                       |                      |                                                |    |                                                                                                                                                                                                                      |                                                              |                                                                                                                                                                                                                                                                                                                     |                                                                                                                                                                                                                                                                                 |
|-----------------------|----------------------|------------------------------------------------|----|----------------------------------------------------------------------------------------------------------------------------------------------------------------------------------------------------------------------|--------------------------------------------------------------|---------------------------------------------------------------------------------------------------------------------------------------------------------------------------------------------------------------------------------------------------------------------------------------------------------------------|---------------------------------------------------------------------------------------------------------------------------------------------------------------------------------------------------------------------------------------------------------------------------------|
|                       |                      |                                                |    |                                                                                                                                                                                                                      | confirmed COVID-19                                           |                                                                                                                                                                                                                                                                                                                     |                                                                                                                                                                                                                                                                                 |
| Naqvi M, 2020 USA     | Prospective cohort   | 82 women                                       |    | All pregnant women admitted to labour and antepartum units and tested.                                                                                                                                               | Mothers were diagnosed by nasopharyngeal swabs.              | Any symptom                                                                                                                                                                                                                                                                                                         |                                                                                                                                                                                                                                                                                 |
|                       |                      | 2 mothers with suspected or confirmed COVID-19 |    |                                                                                                                                                                                                                      |                                                              |                                                                                                                                                                                                                                                                                                                     |                                                                                                                                                                                                                                                                                 |
|                       |                      | 1 mother with confirmed COVID-19               |    |                                                                                                                                                                                                                      |                                                              |                                                                                                                                                                                                                                                                                                                     |                                                                                                                                                                                                                                                                                 |
| Perlman J, 2020 USA   | Prospective cohort   | 31 women                                       | 31 | All laboratory-confirmed women admitted to labour and delivery, whose newborns were triaged to the well-baby nursery or admitted to NICU.                                                                            | Mothers and newborns were diagnosed by nasopharyngeal swabs. | Pregnancy-related: preterm birth, mode of delivery – caesarean section and vaginal, pregnancy-induced hypertension                                                                                                                                                                                                  | Gestational age at delivery, birthweight, admission to NICU, Apgar scores at 1 and 5 minutes                                                                                                                                                                                    |
|                       |                      | 31 mothers with confirmed COVID-19             |    |                                                                                                                                                                                                                      |                                                              |                                                                                                                                                                                                                                                                                                                     |                                                                                                                                                                                                                                                                                 |
| Pereira A, 2020 Spain | Retrospective cohort | 60 women                                       | 23 | First 60 pregnant women with laboratory-confirmed COVID-19.<br><br>Women were admitted to the hospital after presenting in the Obstetrics Emergency Room due to clinical symptoms or due to labour. All were tested. | Mothers and newborns were diagnosed by nasopharyngeal swabs. | COVID-related: all-cause mortality, pneumonia, severe pneumonia, admission to hospital and ICU, length of hospital stay, oxygenation, acute cardiac and renal injury, respiratory failure<br><br>Pregnancy-related: mode of delivery – caesarean section and vaginal, preterm birth, pregnancy-induced hypertension | Foetal growth restriction – defined as foetal weight less than 3 <sup>rd</sup> percentile for gestational age, small-for-gestational age – defined as foetal weight less than 10 <sup>th</sup> percentile for gestational age, admission to NICU, respiratory distress syndrome |
|                       |                      | 60 mothers with confirmed COVID-19             |    |                                                                                                                                                                                                                      |                                                              |                                                                                                                                                                                                                                                                                                                     |                                                                                                                                                                                                                                                                                 |

|                        |                      |                                                     |    |                                                                                                                                                                                                                                                                                                                                                                                                                                                                                                                      |                                                                                                                                                                 |                                                                                                                       |                                                                                                                                                                                                                                               |                                                                                                      |
|------------------------|----------------------|-----------------------------------------------------|----|----------------------------------------------------------------------------------------------------------------------------------------------------------------------------------------------------------------------------------------------------------------------------------------------------------------------------------------------------------------------------------------------------------------------------------------------------------------------------------------------------------------------|-----------------------------------------------------------------------------------------------------------------------------------------------------------------|-----------------------------------------------------------------------------------------------------------------------|-----------------------------------------------------------------------------------------------------------------------------------------------------------------------------------------------------------------------------------------------|------------------------------------------------------------------------------------------------------|
| Qadri F, 2020 USA      | Prospective cohort   | 192 women<br><br>16 mothers with confirmed COVID-19 | 12 | All pregnant women admitted to hospital.<br><br>Testing for SARS-CoV-2 was not universal on admission during this study.                                                                                                                                                                                                                                                                                                                                                                                             | Mothers were diagnosed by nasopharyngeal swabs.<br><br>Newborns were diagnosed by RT-PCRs at 48 hours of age.                                                   |                                                                                                                       | COVID-related: pneumonia, oxygenation, coagulopathy, length of hospital stay<br><br>Pregnancy-related: mode of delivery – caesarean section and vaginal, preterm birth, preterm rupture of membranes, chorioamnionitis                        | Birthweight, Apgar scores at 1 and 5 minutes, small-for-gestational age                              |
| Savasi V, 2020 Italy * | Prospective cohort   | 77 women<br><br>77 mothers with confirmed COVID-19  | 57 | All laboratory-confirmed women admitted at any gestational age of pregnancy or the immediate postpartum period (defined as within 3 days after birth) in 12 maternal hospitals in Northern Italy.<br><br>Testing was carried out only for women with symptoms or known contacts with suspected or confirmed cases.<br><br>One subgroup of patients were those with severe disease (defined by need of urgent delivery for the deterioration of respiratory status or by ICU or subintensive care admission or both). | Mothers were diagnosed by nasopharyngeal swabs.<br><br>Newborns were diagnosed by RT-PCRs.<br><br>Followed diagnostic criteria according to Italian guidelines. | BMI, smoking, ethnicity, any comorbidity, parity, fever, cough, breathlessness, lymphopenia, abnormal LFT, raised CRP | COVID-related: all-cause mortality, pneumonia, admission to ICU, oxygenation, invasive or non-invasive ventilation<br><br>Pregnancy-related: preterm birth, mode of delivery – caesarean section and vaginal, caesarean section before labour | Birthweight, gestational age at delivery, admission to NICU, cord blood pH, Apgar score at 5 minutes |
| Wei L, 2020 China *    | Retrospective cohort | 43 women<br><br>17 mothers with                     |    | All pregnant and non-pregnant women with laboratory-confirmed COVID-19 admitted to hospital.                                                                                                                                                                                                                                                                                                                                                                                                                         | Women were diagnosed by throat swabs.                                                                                                                           | Age, support person positive, any symptom, lymphopenia,                                                               | COVID-related: all-cause mortality, pneumonia, oxygenation, invasive and non-                                                                                                                                                                 |                                                                                                      |



|                         |                      |                                               |    |                                                                                                                                                                                     |                                                                                                                                                                                                                                                                                                                                                                                                                                                                                             |                              |                                                                                                                                                                                                                                                                                                                                                                                |                                                                                                                                                                   |
|-------------------------|----------------------|-----------------------------------------------|----|-------------------------------------------------------------------------------------------------------------------------------------------------------------------------------------|---------------------------------------------------------------------------------------------------------------------------------------------------------------------------------------------------------------------------------------------------------------------------------------------------------------------------------------------------------------------------------------------------------------------------------------------------------------------------------------------|------------------------------|--------------------------------------------------------------------------------------------------------------------------------------------------------------------------------------------------------------------------------------------------------------------------------------------------------------------------------------------------------------------------------|-------------------------------------------------------------------------------------------------------------------------------------------------------------------|
|                         |                      | confirmed COVID-19                            |    | Women with any underlying complication due to a chronic disease (hypertension, diabetes, heart disease, kidney transplantation, lymphoma, connective tissue disease) were excluded. | Followed diagnostic criteria according to National Health Commission of China.                                                                                                                                                                                                                                                                                                                                                                                                              | raised CRP, thrombocytopenia | invasive ventilation, admission to ICU, acute respiratory distress syndrome, coagulopathy, acute cardiac and renal injury, secondary infection, sepsis, length of hospital stay, duration of viral shedding after COVID-19 onset                                                                                                                                               |                                                                                                                                                                   |
| Yang H (2), 2020 China* | Retrospective cohort | 27 women with suspected or confirmed COVID-19 | 24 | All hospitalised pregnant women with laboratory-confirmed or clinically diagnosed COVID-19.                                                                                         | Followed diagnostic criteria according to National Health Commission of China.<br><br>Laboratory-confirmed women were tested by nasal and throat swabs and/or serology IgM/IgG testing of SARS-CoV-2.<br><br>Clinically diagnosed women were those presenting with fever, respiratory symptoms, typical COVID-19 findings on laboratory and radiological findings and a negative result for the presence of SARS-CoV-2.<br><br>Newborns were tested by throat swabs and/or serology IgM/IgG | D-dimers, abnormal LFT       | COVID-related: pneumonia, severe pneumonia, oxygenation, admission to hospital, coagulopathy<br><br>Pregnancy-related: induced abortion, preterm and term birth, preterm-premature rupture of membranes, gestational diabetes, mode of delivery – caesarean section and vaginal, preterm rupture of membranes, caesarean section before labour, pregnancy-induced hypertension | Foetal distress, neonatal asphyxia, birthweight – low birthweight defined as less than 2 500 grams), gestational age at delivery, Apgar scores at 1 and 5 minutes |

|                                   |                      |                                                                                                             |    |                                                                                                                                                                                     |                                                   |                                                                                                                                                                                                                                                              |                                                                                                                      |
|-----------------------------------|----------------------|-------------------------------------------------------------------------------------------------------------|----|-------------------------------------------------------------------------------------------------------------------------------------------------------------------------------------|---------------------------------------------------|--------------------------------------------------------------------------------------------------------------------------------------------------------------------------------------------------------------------------------------------------------------|----------------------------------------------------------------------------------------------------------------------|
|                                   |                      |                                                                                                             |    |                                                                                                                                                                                     | testing of SARS-CoV-2.                            |                                                                                                                                                                                                                                                              |                                                                                                                      |
| Zeng Y, 2020 China                | Retrospective cohort | 16 women<br><br>16 mothers with confirmed COVID-19                                                          | 16 | All pregnant women with laboratory-confirmed COVID-19 and ground-glass opacity on chest CT scan admitted to one obstetric unit.                                                     | Mothers and newborns were diagnosed by RT-PCRs.   | COVID-related: all-cause mortality, length of hospital stay, oxygenation, invasive and non-invasive ventilation, acute cardiac injury<br><br>Pregnancy-related: mode of delivery – caesarean section and vaginal preterm rupture of membranes, preterm birth | Neonatal death, gestational age at delivery, foetal growth restriction, birthweight, Apgar scores at 1 and 5 minutes |
| ROUND 4                           |                      |                                                                                                             |    |                                                                                                                                                                                     |                                                   |                                                                                                                                                                                                                                                              |                                                                                                                      |
| Buckley A, 2020 USA               | Prospective cohort   | 307 women<br><br>307 mothers with suspected or confirmed COVID-19<br><br>50 mothers with confirmed COVID-19 |    | All pregnant women presenting in labour to two institutions within Mount Sinai Health System (all underwent testing).<br><br>All pregnant women admitted were universally screened. | Test used not specified.                          | Support person positive                                                                                                                                                                                                                                      |                                                                                                                      |
| SIVEP-Gripe (23 May), 2020 Brazil | Prospective cohort   | 484 women<br><br>484 mothers                                                                                |    | All pregnant women hospitalised in Brazilian hospitals who tested positive for COVID-19.                                                                                            | Method of diagnosis and testing strategy unclear. | Age, ethnicity, trimester, diabetes, asthma, hypertension, obesity                                                                                                                                                                                           | COVID-related: all-cause mortality, admission to ICU, non-invasive and invasive ventilation                          |

|                            |                      |                                                                                                             |   |                                                                                                                                                                                                                                                                                       |                                                 |                                                                                |                                                                                                                                                                                    |
|----------------------------|----------------------|-------------------------------------------------------------------------------------------------------------|---|---------------------------------------------------------------------------------------------------------------------------------------------------------------------------------------------------------------------------------------------------------------------------------------|-------------------------------------------------|--------------------------------------------------------------------------------|------------------------------------------------------------------------------------------------------------------------------------------------------------------------------------|
|                            |                      | with confirmed COVID-19                                                                                     |   | Exclusion criteria: over 50 years old, age of patient missing.                                                                                                                                                                                                                        |                                                 |                                                                                |                                                                                                                                                                                    |
| Andrikopoulou M, 2020 USA* | Prospective cohort   | 158 women<br><br>158 mothers with confirmed COVID-19                                                        | 8 | 2 groups:<br>1) Pregnant women presenting to inpatient or outpatient setting with symptoms<br>2) Universal testing for all women admitted to the labour unit for delivery or admitted for antepartum indication and postpartum complications<br>2 hospitals in New York City          | Mothers were diagnosed by nasopharyngeal swabs. | Trimester, asthma, gestational diabetes, cough, fever, myalgia, breathlessness | COVID-related: acute kidney injury, sepsis, acidosis, admission to hospital, admission to ICU, oxygenation, invasive ventilation                                                   |
| Giannini A, 2020 Italy     | Retrospective cohort | 21 women<br><br>21 mothers with confirmed COVID-19                                                          |   | All pregnant women admitted to the ICU who tested positive for COVID-19 in a tertiary hospital in Lombardy, Italy.                                                                                                                                                                    | Method of diagnosis unclear.                    |                                                                                | COVID-related: pneumonia, respiratory failure, admission to ICU, invasive and non-invasive ventilation, oxygenation<br><br>Pregnancy-related: mode of delivery – caesarean section |
| Goldfarb IT (1), 2020 USA  | Prospective cohort   | 192 women<br><br>192 mothers with suspected or confirmed COVID-19<br><br>61 mothers with confirmed COVID-19 |   | All women with COVID-19 symptoms while pregnant or within 2 weeks post-partum at a single centre.<br><br>Women tested based on symptoms and epidemiological factors (insufficient testing capacity to test all symptomatic women).<br><br>Two groups: Hispanic and non-Hispanic women | Mothers were diagnosed by nasopharyngeal swabs. |                                                                                | COVID-related: admission to hospital, admission to ICU, all-cause mortality                                                                                                        |

|                       |                    |                                                                                                              |     |                                                                                                                                                                                                                                                                                                                                 |                                                                                                                                                 |                                                                                                                                    |                                                                                                                                                                                                                                                |                                                                                          |
|-----------------------|--------------------|--------------------------------------------------------------------------------------------------------------|-----|---------------------------------------------------------------------------------------------------------------------------------------------------------------------------------------------------------------------------------------------------------------------------------------------------------------------------------|-------------------------------------------------------------------------------------------------------------------------------------------------|------------------------------------------------------------------------------------------------------------------------------------|------------------------------------------------------------------------------------------------------------------------------------------------------------------------------------------------------------------------------------------------|------------------------------------------------------------------------------------------|
| Goldfarb IT, 2020 USA | Prospective cohort | 757 women<br><br>139 mothers with suspected or confirmed COVID-19<br><br>20 mothers with confirmed COVID-19  |     | All women admitted to labour and delivery in four hospitals affiliated with Mass General Brigham Health tested for SARS-CoV-2. They all received universal testing on admission.<br><br>2 groups<br>1. Symptomatic pregnant women<br>2. Asymptomatic pregnant women<br><br>Both groups subdivided according to PCR test result. | Mothers were diagnosed by nasopharyngeal swabs.<br><br>Test used on newborns is unclear.                                                        | Any symptom                                                                                                                        |                                                                                                                                                                                                                                                |                                                                                          |
| Kayem G, 2020 France  | Prospective cohort | 617 women<br><br>617 mothers with suspected or confirmed COVID-19<br><br>597 mothers with confirmed COVID-19 | 197 | All pregnant women in 33 French maternity units with an PCR diagnosis of COVID-19 or with suspected COVID-19 based on chest CT scan findings. Women tested based on symptoms or diagnosed contacts (following French health authorities' recommendations).                                                                      | Mothers were diagnosed by nasal samples.<br><br>Clinically diagnosed women were diagnosed by CT imaging.<br><br>Newborns were diagnosed by PCR. | Age, BMI, diabetes, hypertension, pregnancy hypertension, asthma, chronic respiratory disease, gestational diabetes, smoking, COPD | COVID-related: admission to hospital, oxygenation, non-invasive and invasive ventilation, COVID-specific mortality<br><br>Pregnancy-related: preterm delivery (22-31 weeks and 32-36 weeks), mode of delivery – caesarean section, miscarriage | Stillbirth, neonatal death, admission to NICU                                            |
| Knight M, 2020 UK     | Prospective cohort | 427 women<br><br>427 mothers with confirmed COVID-19                                                         | 268 | All pregnant women admitted to hospital with confirmed COVID-19 in all 194 consultant-led maternity units in the UK.<br><br>Women tested only if they had COVID-19 symptoms.<br><br>All women were included who had a positive RT-PCR                                                                                           | Mothers were clinically diagnosed (radiological findings) or laboratory-confirmed (diagnosed by PCR testing of blood or                         |                                                                                                                                    | COVID-related: hospital admission, admission to ICU, invasive ventilation, all-cause mortality<br><br>Pregnancy-related: mode of delivery – caesarean section and vaginal, preterm delivery, miscarriage                                       | Stillbirth, foetal distress, neonatal death, encephalopathy, gestational age at delivery |

|                                   |                      |                                                                                                            |    |                                                                                                                                                                                                                                                                                                                        |                                                                                                                                                                                                            |                                                                    |                                                                                                                                                       |
|-----------------------------------|----------------------|------------------------------------------------------------------------------------------------------------|----|------------------------------------------------------------------------------------------------------------------------------------------------------------------------------------------------------------------------------------------------------------------------------------------------------------------------|------------------------------------------------------------------------------------------------------------------------------------------------------------------------------------------------------------|--------------------------------------------------------------------|-------------------------------------------------------------------------------------------------------------------------------------------------------|
|                                   |                      |                                                                                                            |    | test or respiratory compromise in the presence of characteristic radiological changes of COVID-19.                                                                                                                                                                                                                     | nasopharyngeal swabs).<br><br>Newborns were diagnosed by PCR testing of blood or nasopharyngeal swab or aspirate (results presented according to timing of positive test. Either <12hr or >12hr of birth). |                                                                    |                                                                                                                                                       |
| LaCourse S, 2020 USA              | Retrospective cohort | 230 women<br><br>60 mothers with suspected or confirmed COVID-19<br><br>13 mothers with confirmed COVID-19 |    | All pregnant and post-partum women who underwent SARS-CoV-2 testing at UW Northwest Birth Center.<br><br>Both outpatients (mostly within 48-72hrs of planned admission) and upon admission.<br><br>2 groups:<br>1) Women tested under targeted symptomatic testing<br>2) Women tested under universal testing approach | Women were diagnosed by RT-PCR.<br><br>42 under targeted symptomatic testing<br>188 under universal testing (approach was started half-way through study).                                                 | Any symptom                                                        | Pregnancy-related: miscarriage, induced abortion                                                                                                      |
| Lumbreras-Marquez MI, 2020 Mexico | Prospective cohort   | 308 women<br><br>308 mothers with confirmed COVID-19                                                       |    | All COVID-positive pregnant women in open database from the Mexican Ministry of Health.                                                                                                                                                                                                                                | Test used not specified.                                                                                                                                                                                   | Age, ethnicity, diabetes, BMI, asthma, hypertension, smoking, COPD | COVID-related: admission to hospital, admission to ICU, pneumonia, invasive ventilation, all-cause mortality                                          |
| Martinez Peres O, 2020 Spain      | Retrospective cohort | 82 women<br><br>82 mothers with                                                                            | 82 | All women with singleton pregnancies and positive PCR test and who delivered within the next 14 days at 96                                                                                                                                                                                                             | Mothers were diagnosed by RT-PCR.                                                                                                                                                                          | Age, parity, any comorbidity, gestational diabetes, preeclampsia,  | COVID-related: oxygenation, invasive ventilation, admission to ICU, sepsis, severe<br><br>Admission to NICU, Apgar score at 5 minutes, cord blood pH, |

|                        |                      |                                                                                                         |   |                                                                                                                                                                                                                                            |                                                                                        |                                                                                             |                                                                                                                                                                                                                                                        |                                                                                      |
|------------------------|----------------------|---------------------------------------------------------------------------------------------------------|---|--------------------------------------------------------------------------------------------------------------------------------------------------------------------------------------------------------------------------------------------|----------------------------------------------------------------------------------------|---------------------------------------------------------------------------------------------|--------------------------------------------------------------------------------------------------------------------------------------------------------------------------------------------------------------------------------------------------------|--------------------------------------------------------------------------------------|
|                        |                      | confirmed COVID-19                                                                                      |   | level 2 or level 3 maternity hospitals in Spain.<br><br>Women tested if they were symptomatic or had a history of potential exposure. Some hospitals used universal screening.                                                             | Neonates: nasopharyngeal swab for RT-PCR within 6hrs of life.                          | asthma, smoking, any symptom, abnormal LFT, lymphopenia                                     | pneumonia, ICU length of stay<br><br>Pregnancy-related: mode of delivery – caesarean section, preterm delivery (<34 weeks and <37 weeks), preterm rupture of membranes, preterm-premature rupture of membranes, labour onset – spontaneous and induced | birthweight, gestational age at delivery                                             |
| Mendoza M, 2020 Spain* | Prospective cohort   | 42 women<br><br>42 mothers with confirmed COVID-19                                                      |   | All singleton pregnancies with COVID-19 at >20+0 weeks presenting to the emergency department at a tertiary referral hospital with suspected COVID-19 (dry cough and fever) and had laboratory-confirmed COVID-19.                         | Mothers were diagnosed by RT PCR assay of nasal and pharyngeal swabs.                  | Age, BMI, ethnicity, gestational age, smoking, parity, hypertension, diabetes, preeclampsia | COVID-related: admission to ICU, severe pneumonia<br><br>Pregnancy-related: mode of delivery – caesarean section                                                                                                                                       |                                                                                      |
| Ochiai D, 2020 Japan   | Retrospective cohort | 52 women<br><br>3 mothers with suspected or confirmed COVID-19<br><br>2 mothers with confirmed COVID-19 | 3 | All pregnant women admitted to Keio University Hospital with confirmed or suspected COVID-19.<br><br>Universal screening was carried out. Testing performed prior to admission in all cases, except 2 which were in labour before testing. | Mothers were diagnosed by PCR.<br><br>Newborns were diagnosed by PCR.                  | Any symptom                                                                                 | Pregnancy-related: mode of delivery – caesarean section                                                                                                                                                                                                | Admission to NICU, Apgar score at 1 and 5 minutes, birth weight                      |
| Romagano MP, 2020 USA  | Retrospective cohort | 73 women<br><br>73 mothers with confirmed                                                               | 8 | All pregnant women and their neonates requiring critical care for severe COVID-19 in 2 hospitals in New Jersey.                                                                                                                            | Mothers: study does not specify test used.<br><br>Newborns were diagnosed by RT-PCR on |                                                                                             | COVID-related: oxygenation, invasive ventilation, respiratory failure<br><br>Pregnancy-related: mode of delivery -                                                                                                                                     | Admission to NICU, respiratory distress syndrome, gestational age at delivery, birth |

|                                 |                      | COVID-19                                                                                                  |     |                                                                                                                                                                                                                                                                                                                                                                                                                                                                                                                                                           | nasopharyngeal samples. Timing and number of tests varied between neonates (at 24hrs – 10 days)                                                                                                                                                 |                                                                                                        | caesarean section, preterm delivery                                                                                                                                        | weight, Apgar score at 1 and 5 minutes, length of stay in NICU, NEC |
|---------------------------------|----------------------|-----------------------------------------------------------------------------------------------------------|-----|-----------------------------------------------------------------------------------------------------------------------------------------------------------------------------------------------------------------------------------------------------------------------------------------------------------------------------------------------------------------------------------------------------------------------------------------------------------------------------------------------------------------------------------------------------------|-------------------------------------------------------------------------------------------------------------------------------------------------------------------------------------------------------------------------------------------------|--------------------------------------------------------------------------------------------------------|----------------------------------------------------------------------------------------------------------------------------------------------------------------------------|---------------------------------------------------------------------|
| Servei Català 29/05, 2020 Spain | Prospective cohort   | 260 women<br><br>260 mothers with confirmed COVID-19                                                      | 129 | All pregnant women with COVID-19 reported from all centres in Catalonia.                                                                                                                                                                                                                                                                                                                                                                                                                                                                                  | Method of diagnosis unclear.                                                                                                                                                                                                                    | Age, any comorbidity, fever, cough, breathlessness                                                     | COVID-related: admission to hospital, admission to ICU, invasive ventilation<br><br>Pregnancy-related: mode of delivery - caesarean section, vaginal and operative vaginal | Neonatal death                                                      |
| Wang Z, 2020 China              | Retrospective cohort | 72 women<br><br>30 mothers with suspected or confirmed COVID-19<br><br>13 mothers with confirmed COVID-19 | 31  | All pregnant and nonpregnant women admitted to the Central Hospital of Wuhan.<br><br>Exclusion criteria: negative result by nasopharyngeal swabs and RT PCR (repeated twice every 2 days in 2 different labs), male, female patients younger than 20 years or older than 40 years, patients referred from one department to another or from other hospitals (excluded because of difficulty in obtaining their medical data)<br>+ exclusion of 2 nonpregnant women who died during the study period because they had severe underlying health conditions. | Women were diagnosed by RT-PCR<br><br>Clinically diagnosed women were diagnosed based on chest CT findings (bilateral ground-glass opacities, consolidation, rounded morphology, peripheral lung distribution – Fleischner Society guidelines). | Diabetes, hypertension, multiple pregnancy, obesity, asthma, fever, cough, breathlessness, any symptom | COVID-related: admission to hospital, pneumonia<br><br>Pregnancy-related: mode of delivery – caesarean section and vaginal, preterm rupture of membranes                   |                                                                     |

|                       |                      |                                                                                                             |                                                                                                                                                                                                                                                                                  |                                                                                                                                 |                                                                                                                                                                                                                             |                                 |
|-----------------------|----------------------|-------------------------------------------------------------------------------------------------------------|----------------------------------------------------------------------------------------------------------------------------------------------------------------------------------------------------------------------------------------------------------------------------------|---------------------------------------------------------------------------------------------------------------------------------|-----------------------------------------------------------------------------------------------------------------------------------------------------------------------------------------------------------------------------|---------------------------------|
| Yuan L, 2020 China    | Retrospective cohort | 28 women<br>17<br><br>28 mothers with confirmed COVID-19                                                    | All pregnant women admitted to the Department of Obstetrics, East Hospital of People's Hospital of Wuhan University.                                                                                                                                                             | Mothers were diagnosed following Chinese diagnostic criteria. Test used was PCR.<br><br>Newborns were diagnosed by throat swab. | COVID-related: pneumonia<br><br>Pregnancy-related: preterm delivery                                                                                                                                                         | Apgar scores at 1 and 5 minutes |
| ROUND 5               |                      |                                                                                                             |                                                                                                                                                                                                                                                                                  |                                                                                                                                 |                                                                                                                                                                                                                             |                                 |
| Blitz M (1), 2020 USA | Retrospective cohort | 462 women<br><br>462 mothers with confirmed COVID-19                                                        | All symptomatic pregnant and postpartum women admitted to the ICU with confirmed COVID-19 in 11 hospitals in New York..<br><br>Women who tested positive but were admitted to the ICU for indications other than acute or impending hypoxemic respiratory failure were excluded. | Mothers were diagnosed by nasopharyngeal swab.<br><br>Newborns were diagnosed by PCR on the first day of life.                  | COVID-related: all-cause maternal death, ICU length of stay, invasive ventilation, acute kidney injury<br><br>Pregnancy-related: preterm delivery, mode of delivery – caesarean section and vaginal, labour onset - induced |                                 |
| Cosma S, 2020 Italy   | Prospective cohort   | 225 women<br><br>225 mothers with suspected or confirmed COVID-19<br><br>23 mothers with confirmed COVID-19 | 2 groups:<br>1) Women referred for first trimester spontaneous abortion care (case group)<br>2) women 12 weeks pregnant admitted to hospital for nuchal translucency (control group)                                                                                             | Women were diagnosed by RT-PCR on nasopharyngeal swabs or serology (IgG/IgM Ab against SARS-CoV-2).                             | COVID-related: pneumonia, hospital admission                                                                                                                                                                                |                                 |



|                             |                    |                                                                                                              |                                                                                                                                                                                                                                                                                                |                                                                                                            |                        |                                   |
|-----------------------------|--------------------|--------------------------------------------------------------------------------------------------------------|------------------------------------------------------------------------------------------------------------------------------------------------------------------------------------------------------------------------------------------------------------------------------------------------|------------------------------------------------------------------------------------------------------------|------------------------|-----------------------------------|
| Crovetto F, 2020, Spain     | Prospective cohort | 874 women<br><br>874 mothers with suspected or confirmed COVID-19<br><br>125 mothers with confirmed COVID-19 | All pregnant women attending hospital for first trimester screening (10-16wk gestation) or delivery.                                                                                                                                                                                           | Mothers were diagnosed by serology (IgG and IgM/IgA antibodies).                                           | Trimester              | COVID-related: hospital admission |
| Emeruwa U, 2020 USA*        | Prospective cohort | 396 women<br><br>396 mothers with suspected or confirmed COVID-19<br><br>71 mothers with confirmed COVID-19  | All pregnant women admitted to the labour and delivery unit.<br><br>Universal testing was carried out.<br><br>Exclusion criteria: patient not linked to buildings and neighbourhoods in New York city (according to the US Census Bureau's American Community Survey and real state tax data). | Mothers were diagnosed by nasopharyngeal PCR test.                                                         | Hypertension, diabetes |                                   |
| Freiesleben N, 2020 Denmark | Prospective cohort | 1055 women<br><br>30 mothers with confirmed COVID-19                                                         | 2 groups:<br>1) pregnant women with double test ( $\beta$ -hCG and PAPP-A) taken in first trimester risk assessment<br>2) women with a first trimester pregnancy loss before double test<br><br>Copenhagen University Hospital Hvidovre                                                        | Women were diagnosed by serology (IgM and IgG antibodies).<br>Cohort 1: serology on serum from double test |                        | Pregnancy-related: miscarriage    |

|                     |                    |                                                                                                           |     |                                                                                                                                                                                                                                                                                                                                                                                                                                                                             |                                                                                                                                                                                       |                                                          |                                                                                                                                                                                                                                                                 |                                                                                                                                                                   |
|---------------------|--------------------|-----------------------------------------------------------------------------------------------------------|-----|-----------------------------------------------------------------------------------------------------------------------------------------------------------------------------------------------------------------------------------------------------------------------------------------------------------------------------------------------------------------------------------------------------------------------------------------------------------------------------|---------------------------------------------------------------------------------------------------------------------------------------------------------------------------------------|----------------------------------------------------------|-----------------------------------------------------------------------------------------------------------------------------------------------------------------------------------------------------------------------------------------------------------------|-------------------------------------------------------------------------------------------------------------------------------------------------------------------|
|                     |                    |                                                                                                           |     | Exclusion criteria: did not provide informed consent.                                                                                                                                                                                                                                                                                                                                                                                                                       | Cohort 2:<br>serology on blood sample                                                                                                                                                 |                                                          |                                                                                                                                                                                                                                                                 |                                                                                                                                                                   |
| Griffin I, 2020 USA | Prospective cohort | 78 women<br><br>78 mothers with suspected or confirmed COVID-19<br><br>26 mothers with confirmed COVID-19 |     | All maternal-infant dyads whose mothers had confirmed/suspected COVID-19 before their admission to labour and delivery (L&D) or at any time before their discharge at 2 hospitals in New Jersey.<br><br>Exclusion criteria: women presenting to L&D but did not deliver, pregnant women presenting to gynaecology services, pregnant women with viable fetuses being cared for outside labour and delivery (unless they delivered), neonates who were readmitted from home. | Mothers were diagnosed by RT-PCR on nasopharyngeal swabs.<br><br>Newborns were diagnosed by RT-PCR on nasopharyngeal swabs. 15 newborns were tested. Swabs taken after 24hrs of life. |                                                          | Pregnancy-related: mode of delivery – vaginal and caesarean section                                                                                                                                                                                             |                                                                                                                                                                   |
| Khoury R, 2020 USA  | Prospective cohort | 241 women<br><br>241 mothers with confirmed COVID-19                                                      | 247 | All pregnant women with confirmed COVID-19 in the third trimester who were admitted and delivered at 5 hospitals in New York.<br><br>Testing strategy used varied according to hospital. Some used universal screening, others symptom/epidemiological risk factor-based testing.                                                                                                                                                                                           | Mothers were diagnosed by RT-PCR on nasopharyngeal swabs.<br><br>Test used to diagnose newborns unclear.                                                                              | Age, ethnicity, BMI, hypertension, diabetes, any symptom | COVID-related: admission to ICU, invasive ventilation, all-cause mortality, pneumonia<br><br>Pregnancy-related: premature rupture of membranes, mode of delivery – caesarean section, vaginal and operative vaginal, preterm delivery (<34 weeks and <37 weeks) | Admission to NICU, stillbirth, birthweight, gestational age at delivery, Apgar score at 5 minutes, sepsis, respiratory distress syndrome, congenital malformation |

|                            |                      |                                                                                                              |     |                                                                                                                                                                                                                                                                                                                                |                                                                                                                                                                                                                                                                          |                                                                                                                                                                         |                                                                                                                                                                                                                                                                                                                                                            |                                                                                                                                                                         |
|----------------------------|----------------------|--------------------------------------------------------------------------------------------------------------|-----|--------------------------------------------------------------------------------------------------------------------------------------------------------------------------------------------------------------------------------------------------------------------------------------------------------------------------------|--------------------------------------------------------------------------------------------------------------------------------------------------------------------------------------------------------------------------------------------------------------------------|-------------------------------------------------------------------------------------------------------------------------------------------------------------------------|------------------------------------------------------------------------------------------------------------------------------------------------------------------------------------------------------------------------------------------------------------------------------------------------------------------------------------------------------------|-------------------------------------------------------------------------------------------------------------------------------------------------------------------------|
| Maraschini A, 2020 Italy   | Prospective cohort   | 146 women<br><br>146 mothers with suspected or confirmed COVID-19<br><br>142 mothers with confirmed COVID-19 | 149 | All women with confirmed COVID-19 who have birth in any Italian hospital.                                                                                                                                                                                                                                                      | Mothers were diagnosed by RT-PCR on nasopharyngeal swabs.<br><br>Clinically diagnosed mothers were diagnosed based on chest x-ray findings.<br><br>Test used on newborns unclear. 5 newborns were tested on the day of delivery, 1 the day after, 3 6-9 days from birth. | Age, any comorbidity, obesity, diabetes, hypertension, smoking, parity, multiple pregnancy, fever, cough, breathlessness, myalgia, any symptom, lymphopenia, raised CRP | COVID-related: pneumonia, invasive and non-invasive ventilation, admission to ICU, respiratory failure, all-cause mortality<br><br>Pregnancy-related: preterm delivery (<32 weeks and <37 weeks), mode of delivery – vaginal and caesarean section, labour onset – spontaneous and induced, postpartum haemorrhage, preterm-premature rupture of membranes | Gestational age at delivery, stillbirth, respiratory distress syndrome, admission to NICU, neonatal death, birthweight, Apgar scores at 1 and 5 minutes, neonatal death |
| Mohr-Sasson A, 2020 Israel | Retrospective cohort | 36 women<br><br>11 mothers with confirmed COVID-19                                                           |     | 2 groups:<br>1) All pregnant women examined at the obstetric emergency room with confirmed COVID-19<br>Exclusion criteria: patients with substantial comorbidity<br>2) Non-pregnant women with confirmed COVID-19 matched (to group 1) by age                                                                                  | Women were diagnosed by RT-PCR on oropharyngeal and/or nasopharyngeal swab samples.                                                                                                                                                                                      |                                                                                                                                                                         | COVID-related: admission to hospital                                                                                                                                                                                                                                                                                                                       |                                                                                                                                                                         |
| San-Juan R, 2020 Spain     | Retrospective cohort | 32 women<br><br>32 mothers with confirmed COVID-19                                                           |     | All adult (18 and over) pregnant women with COVID-19 who attended the department of obstetrics at Hospital 12 de Octubre, Madrid.<br><br>Exclusion: COVID-19 diagnosis at the time of or after delivery<br><br>2 groups:<br>1) COVID-19 pneumonia (diagnosis required positive PCR and presence of infiltrates in chest x-ray) | Mothers were diagnosed by RT-PCR on nasopharyngeal swab or sputum samples.<br><br>Newborns were diagnosed by PCR on nasopharyngeal swabs.                                                                                                                                | Age, gestational age, asthma, BMI, gestational diabetes, hypertension, any comorbidity, cough, breathlessness, fever, myalgia                                           | COVID-related: hospital admission, pneumonia, severe pneumonia, oxygenation, invasive ventilation, ARDS, admission to ICU<br><br>Pregnancy-related: mode of delivery – caesarean section and vaginal, preterm delivery                                                                                                                                     |                                                                                                                                                                         |

2) COVID-19 URTI  
(positive PCR but no  
radiological findings and/or  
absence of cough, dyspnoea,  
and chest pain)

|                          |                      |                |                                                                                       |                                                                                                                                                                                                                                                                                     |                                                                                                                                                                                                                                                                                                                                                                                                                                                              |                                                                                                                                                                                                                                                    |                                                                                                                                                                                                                                                                                                                                                                                                                                                                                   |                                                                                                                                                                          |
|--------------------------|----------------------|----------------|---------------------------------------------------------------------------------------|-------------------------------------------------------------------------------------------------------------------------------------------------------------------------------------------------------------------------------------------------------------------------------------|--------------------------------------------------------------------------------------------------------------------------------------------------------------------------------------------------------------------------------------------------------------------------------------------------------------------------------------------------------------------------------------------------------------------------------------------------------------|----------------------------------------------------------------------------------------------------------------------------------------------------------------------------------------------------------------------------------------------------|-----------------------------------------------------------------------------------------------------------------------------------------------------------------------------------------------------------------------------------------------------------------------------------------------------------------------------------------------------------------------------------------------------------------------------------------------------------------------------------|--------------------------------------------------------------------------------------------------------------------------------------------------------------------------|
| Sentilhes L, 2020 France | Retrospective cohort | 54 women<br>21 | 54 mothers with suspected or confirmed COVID-19<br>38 mothers with confirmed COVID-19 | All pregnant women with confirmed or suspected COVID-19 infection admitted to Strasbourg university Hospital.<br><br>Exclusion criteria: women with ongoing pregnancy and a time from illness onset to April 3 shorter than 14 days.<br><br>Testing performed on symptomatic women. | Mothers were diagnosed RT-PCR on nasopharyngeal swabs.<br><br>Clinically diagnosed mothers had to have at least 2 clinical manifestations (symptoms, imaging features, decreased/normal total number of leukocytes and lymphocyte counts in early stage disease) for diagnosis.<br><br>Newborns were diagnosed by RT-PCR on neonatal throat and rectal swabs at birth or on day 1, again on day 3 in term neonates and on days 7 and 14 in preterm neonates. | Age, BMI, asthma, hypertension, diabetes, asthma, multiple pregnancy, parity, smoking, gestational diabetes, pregnancy hypertension, gestational age, support person positive, fever, cough, breathlessness, lymphopenia, raised CRP, abnormal LFT | COVID-related: oxygenation, non-invasive and invasive ventilation, respiratory failure, admission to ICU, ICU length of stay, secondary infection, pneumonia, acute kidney failure, ARDS<br><br>Pregnancy-related: miscarriage, induced abortion, preterm delivery, mode of delivery – caesarean section, vaginal and operative vaginal, labour onset – spontaneous and induced, postpartum haemorrhage (blood loss $\geq 500\text{mL}$ ), preterm-premature rupture of membranes | Gestational age at delivery, neonatal death, admission to NICU, birth weight, small for gestational age, Apgar score at 5 minutes, foetal growth restriction, stillbirth |
|--------------------------|----------------------|----------------|---------------------------------------------------------------------------------------|-------------------------------------------------------------------------------------------------------------------------------------------------------------------------------------------------------------------------------------------------------------------------------------|--------------------------------------------------------------------------------------------------------------------------------------------------------------------------------------------------------------------------------------------------------------------------------------------------------------------------------------------------------------------------------------------------------------------------------------------------------------|----------------------------------------------------------------------------------------------------------------------------------------------------------------------------------------------------------------------------------------------------|-----------------------------------------------------------------------------------------------------------------------------------------------------------------------------------------------------------------------------------------------------------------------------------------------------------------------------------------------------------------------------------------------------------------------------------------------------------------------------------|--------------------------------------------------------------------------------------------------------------------------------------------------------------------------|

ROUND 6a

|                                            |                      |                                                                                                             |    |                                                                                                                                                                                                                                                                                                                                                       |                                                                                                                                                                    |                                                                                                                                                                                                                                                              |                                                        |
|--------------------------------------------|----------------------|-------------------------------------------------------------------------------------------------------------|----|-------------------------------------------------------------------------------------------------------------------------------------------------------------------------------------------------------------------------------------------------------------------------------------------------------------------------------------------------------|--------------------------------------------------------------------------------------------------------------------------------------------------------------------|--------------------------------------------------------------------------------------------------------------------------------------------------------------------------------------------------------------------------------------------------------------|--------------------------------------------------------|
| NethOSS, 2020 (June 19 update) Netherlands | Prospective cohort   | 241 women<br><br>241 pregnant women with confirmed COVID-19                                                 | 75 | All COVID-19 positive women registered in the Netherlands.                                                                                                                                                                                                                                                                                            | COVID-19 was laboratory-confirmed in women and newborns. Test used not specified.                                                                                  | COVID-related: all-cause mortality, admission to ICU, hospital admission, pneumonia, oxygenation, non-invasive and invasive ventilation<br><br>Pregnancy-related: miscarriage, mode of delivery – caesarean section, preterm birth (<36 weeks and >36 weeks) | Neonatal mortality, foetal distress, admission to NICU |
| ROUND 6b                                   |                      |                                                                                                             |    |                                                                                                                                                                                                                                                                                                                                                       |                                                                                                                                                                    |                                                                                                                                                                                                                                                              |                                                        |
| Blitz M (2), 2020 USA                      | Retrospective cohort | 382 women<br><br>382 mothers with suspected or confirmed COVID-19<br><br>71 mothers with confirmed COVID-19 |    | All women admitted for delivery at four hospitals.<br><br>Universal screening was carried out with almost all women tested. Seven women were tested more than 48 hours before admission due to symptoms.<br><br>Antepartum and postpartum admissions, triage evaluations and hospitalisations that occurred before universal screening were excluded. | Mothers were diagnosed by nasopharyngeal swabs within an hour of admission or within 48 hours before admission for scheduled induced labour and caesarean section. |                                                                                                                                                                                                                                                              |                                                        |
| Fassett MJ, 2020 USA                       | Retrospective cohort | 3923 women<br><br>17 mothers with confirmed COVID-19                                                        |    | All women admitted to labour and delivery units for delivery in 15 hospitals.<br><br>Universally screening was carried out.                                                                                                                                                                                                                           | Mothers were diagnosed by swabs from posterior oropharynx and nasopharynx.<br><br>Newborns born to laboratory-confirmed                                            | Age, ethnicity, BMI, smoking, parity, any comorbidity                                                                                                                                                                                                        |                                                        |

|                                       |                      |                                                                                                                 |    |                                                                                                                                                                                                                           |                                                                                                                                      |                                                      |                                                                                                                                                                          |                                                                                                                                          |
|---------------------------------------|----------------------|-----------------------------------------------------------------------------------------------------------------|----|---------------------------------------------------------------------------------------------------------------------------------------------------------------------------------------------------------------------------|--------------------------------------------------------------------------------------------------------------------------------------|------------------------------------------------------|--------------------------------------------------------------------------------------------------------------------------------------------------------------------------|------------------------------------------------------------------------------------------------------------------------------------------|
|                                       |                      |                                                                                                                 |    |                                                                                                                                                                                                                           | mothers were diagnosed by oropharyngeal/nasopharyngeal combination swab at 24 hours of life.                                         |                                                      |                                                                                                                                                                          |                                                                                                                                          |
| Gobierno de Mexico 06/06, 2020 Mexico | Prospective cohort   | 5238 women<br><br>2493 mothers with suspected or confirmed COVID-19<br><br>1935 mothers with confirmed COVID-19 |    | All pregnant and postpartum women diagnosed with COVID-19 (including confirmed cases) who were followed-up and reported by the Mexican government.                                                                        | Method of diagnosis is unclear.                                                                                                      |                                                      | COVID-related: all-cause mortality, COVID-specific mortality, invasive ventilation, admission to ICU and hospital, severe pneumonia                                      |                                                                                                                                          |
| Gracia-Perez-Bonfils A, 2020 Spain    | Retrospective cohort | 12 women<br><br>12 mothers with confirmed COVID-19                                                              | 12 | All symptomatic pregnant women with COVID-19 identified from two hospitals.                                                                                                                                               | Method of diagnosis is unclear.                                                                                                      |                                                      | Apgar score at 5 minutes, cord blood pH (neonatal metabolic acidosis defined as pH less than 7.0)                                                                        |                                                                                                                                          |
| Vivanti A (1), 2020 France            | Retrospective cohort | 240 women<br><br>100 mothers with suspected or confirmed COVID-19                                               | 36 | All women with COVID-19 in the second or third trimester presented in four obstetric units.<br><br>Testing was carried out on symptomatic patients.<br><br>Groups<br>1) Women hospitalised in ICUs after first assessment | Laboratory-confirmed mothers were diagnosed by RT-PCRs of respiratory tract samples.<br><br>Clinically diagnosed mother had chest CT | Diabetes, hypertension, smoking, asthma, lymphopenia | COVID-related: all-cause mortality, acute respiratory distress syndrome, invasive and non-invasive ventilation, oxygenation, coagulopathy, admission to ICU and hospital | Stillbirth, neonatal death, admission to NICU, neonatal sepsis, cord blood pH, Apgar scores at 1 minute and 5 minutes, birthweight (less |

|                      |                      |                                                    |    |                                                                                                                                                                                                                   |                                                                                                                                                                                                                                        |                                                                                                             |                                                                                                                                                                                                                                                                                                                                        |                                                                                         |
|----------------------|----------------------|----------------------------------------------------|----|-------------------------------------------------------------------------------------------------------------------------------------------------------------------------------------------------------------------|----------------------------------------------------------------------------------------------------------------------------------------------------------------------------------------------------------------------------------------|-------------------------------------------------------------------------------------------------------------|----------------------------------------------------------------------------------------------------------------------------------------------------------------------------------------------------------------------------------------------------------------------------------------------------------------------------------------|-----------------------------------------------------------------------------------------|
|                      |                      | 99 mothers with confirmed COVID-19                 |    | 2) Women who were not hospitalised in ICUs after first assessment (outpatient follow-up or hospitalisation without intensive care)                                                                                | findings suspicious of SARS-CoV-2 infection in spite of negative RT-PCR.<br><br>Newborns were diagnosed by RT-PCRs.                                                                                                                    |                                                                                                             | Pregnancy-related: miscarriage, preterm delivery, mode of delivery – caesarean section and vaginal, wound infection, pregnancy-induced hypertension, premature rupture of membranes                                                                                                                                                    | than 10 <sup>th</sup> percentile)                                                       |
| Xu S, 2020 China     | Retrospective cohort | 64 women<br><br>34 mothers with confirmed COVID-19 | 23 | All laboratory-confirmed women aged between 20 and 40 years with COVID-19 admitted to a hospital.<br><br>2 groups<br>1) Pregnant women with COVID-19<br>2) Non-pregnant women of reproductive age with COVID-19   | Followed diagnostic criteria according to National Health Commission of China.<br><br>Mothers were diagnosed by RT-PCRs of respiratory samples (e.g. sputum, nasopharyngeal swab).<br><br>Newborns were diagnosed by pharyngeal swabs. | Age, diabetes, fever, cough, breathlessness, myalgia, lymphopenia, raised WCC, raised D-dimer, Abnormal LFT | COVID-related: all-cause mortality, invasive and non-invasive ventilation, oxygenation, admission to ICU, length of hospital stay<br><br>Pregnancy-related: induced abortion, preterm delivery, gestational diabetes, mode of delivery – caesarean section and vaginal, pregnancy-induced hypertension, premature rupture of membranes | Stillbirth, neonatal death, foetal distress, neonatal asphyxia, Apgar score in 1 minute |
| ROUND 7              |                      |                                                    |    |                                                                                                                                                                                                                   |                                                                                                                                                                                                                                        |                                                                                                             |                                                                                                                                                                                                                                                                                                                                        |                                                                                         |
| Abeyuriya S, 2020 UK | Prospective cohort   | 178 women<br><br>7 mothers with confirmed COVID-19 |    | All women admitted to the maternity unit of a hospital.<br><br>Universal screening was carried out.<br><br>2 women were excluded – one has a past suspicion of COVID-19 infection and the other declined testing. | Mothers were diagnosed by nasopharyngeal swabs.                                                                                                                                                                                        |                                                                                                             |                                                                                                                                                                                                                                                                                                                                        |                                                                                         |

|                       |                      |                                                                                                   |    |                                                                                                                                                                                                                    |                                                                                                                                                                                                                                                                                          |             |                                                                                                                                                                                                                                                                                                                                                                                                                                                     |                                                                                                                                                                     |
|-----------------------|----------------------|---------------------------------------------------------------------------------------------------|----|--------------------------------------------------------------------------------------------------------------------------------------------------------------------------------------------------------------------|------------------------------------------------------------------------------------------------------------------------------------------------------------------------------------------------------------------------------------------------------------------------------------------|-------------|-----------------------------------------------------------------------------------------------------------------------------------------------------------------------------------------------------------------------------------------------------------------------------------------------------------------------------------------------------------------------------------------------------------------------------------------------------|---------------------------------------------------------------------------------------------------------------------------------------------------------------------|
| Antoun L, 2020 UK     | Prospective cohort   | 79 women<br>79 mothers with suspected or confirmed COVID-19<br>23 mothers with confirmed COVID-19 | 20 | All laboratory-confirmed women with singleton and multiple pregnancies admitted to a maternity unit of a hospital.<br><br>Testing was only carried out on symptomatic patients.                                    | Mothers were diagnosed by nasopharyngeal swabs along with symptoms, chest x-ray and chest CT findings.<br><br>Newborns were diagnosed by nasopharyngeal swabs taken on the day of delivery and three days after. An additional pharyngeal swab was taken for some newborns on suspicion. |             | COVID-related: all-cause mortality, COVID-specific mortality, pneumonia, acute respiratory distress syndrome, invasive ventilation, oxygenation, coagulopathy, admission to ICU, severe pneumonia, acute renal and hepatic injury, sepsis<br><br>Pregnancy-related: miscarriage, preterm delivery, preterm-premature rupture of membranes, mode of delivery – caesarean section and vaginal, postpartum haemorrhage, pregnancy-induced hypertension | Foetal distress, Apgar scores at 1 minute and 5 minutes, neonatal asphyxia, foetal growth restriction, gestational age at delivery, neonatal pneumonia, birthweight |
| Aslan MM, 2020 Turkey | Prospective cohort   | 12 women<br>12 mothers with confirmed COVID-19                                                    |    | All laboratory-confirmed women admitted to a hospital.<br><br>It is unclear how testing was carried out.                                                                                                           | Mothers were diagnosed by RT-PCRs of respiratory samples.                                                                                                                                                                                                                                |             | COVID-related: admission to ICU, severe pneumonia                                                                                                                                                                                                                                                                                                                                                                                                   |                                                                                                                                                                     |
| Ayed A, 2020 Kuwait   | Retrospective cohort | 185 women<br>185 mothers with confirmed COVID-19                                                  | 41 | All laboratory-confirmed women and their newborns admitted to the maternity department of a hospital.<br><br>Testing was carried out on symptomatic patients or those who had been in contact with infected cases. | Mothers were diagnosed by nasopharyngeal swabs.<br><br>Newborns were diagnosed by nasopharyngeal swabs on day 5 and day 14 after delivery.                                                                                                                                               | Any symptom | COVID-related: all-cause mortality, COVID-specific mortality, pneumonia, invasive ventilation, oxygenation, admission to ICU, length of hospital stay, severe pneumonia                                                                                                                                                                                                                                                                             | Stillbirth, neonatal death, foetal distress, gestational age at delivery, birthweight, Apgar scores at 1 minute and 5 minutes                                       |



|                       |                      |                                                                                                   |    |                                                                                                                                                                                                                                                                                                                                                                                                                                                                                                                                                                                              |                                                                                                                                                                                                                                                                                                                                                                                   |                                                                                                                                                                           |                                                                                                                                                                                                                                                                                                                                                       |                                                                     |
|-----------------------|----------------------|---------------------------------------------------------------------------------------------------|----|----------------------------------------------------------------------------------------------------------------------------------------------------------------------------------------------------------------------------------------------------------------------------------------------------------------------------------------------------------------------------------------------------------------------------------------------------------------------------------------------------------------------------------------------------------------------------------------------|-----------------------------------------------------------------------------------------------------------------------------------------------------------------------------------------------------------------------------------------------------------------------------------------------------------------------------------------------------------------------------------|---------------------------------------------------------------------------------------------------------------------------------------------------------------------------|-------------------------------------------------------------------------------------------------------------------------------------------------------------------------------------------------------------------------------------------------------------------------------------------------------------------------------------------------------|---------------------------------------------------------------------|
|                       |                      |                                                                                                   |    | Patients who had an ambiguous or negative test result were excluded.                                                                                                                                                                                                                                                                                                                                                                                                                                                                                                                         |                                                                                                                                                                                                                                                                                                                                                                                   |                                                                                                                                                                           | Pregnancy-related: miscarriage, preterm delivery, spontaneous preterm delivery, term delivery, preterm-premature rupture of membranes, gestational diabetes, mode of delivery – caesarean section and vaginal, pregnancy-induced hypertension, premature rupture of membranes                                                                         |                                                                     |
| Barbero P, 2020 Spain | Retrospective cohort | 91 women<br>91 mothers with suspected or confirmed COVID-19<br>83 mothers with confirmed COVID-19 | 24 | All pregnant and postpartum (less than or equal to 40 days from birth) women diagnosed with COVID-19. Cases presented at the labour and delivery unit, obstetric emergency department and pregnancy consultations.<br><br>Testing was initially carried out on symptomatic patients (presenting with fever, dry cough, dyspnoea, chills, myalgia, headache, coryza and recent loss of taste or smell). Universal screening of all admitted patients started on 8 <sup>th</sup> April.<br><br>2 groups:<br>1) Women hospitalised due to COVID-19<br>2) Women not hospitalised due to COVID-19 | Laboratory-confirmed mothers were diagnosed by nasopharyngeal swabs.<br><br>Clinically-diagnosed mothers were diagnosed by chest x-ray findings despite two consecutive negative tests that were done 24 hours apart.<br><br>Newborns were diagnosed by nasopharyngeal swabs 2 hours after delivery. Those from postpartum mothers were tested straight after mother's diagnosis. | Age, ethnicity, asthma, diabetes, hypertension, BMI, multiple pregnancy, gestational age, trimester, gestational diabetes, cough, fever, myalgia, raised CRP, lymphopenia | COVID-related: all-cause mortality, COVID-specific mortality, pneumonia, invasive and non-invasive ventilation, admission to ICU and hospital, oxygenation<br><br>Pregnancy-related: preterm delivery, preterm-premature rupture of membranes, gestational diabetes, mode of delivery – caesarean section and vaginal, pregnancy-induced hypertension | Neonatal death, birthweight, Apgar score at 5 minute, cord blood pH |

|                                |                      |                                                     |                                                                                                                                                                                                            |                                                                                  |                                |                                                                                                                                                                                                                        |                |
|--------------------------------|----------------------|-----------------------------------------------------|------------------------------------------------------------------------------------------------------------------------------------------------------------------------------------------------------------|----------------------------------------------------------------------------------|--------------------------------|------------------------------------------------------------------------------------------------------------------------------------------------------------------------------------------------------------------------|----------------|
| Berkowitz KM, 2020 USA         | Prospective cohort   | 492 women<br><br>10 mothers with confirmed COVID-19 | All women admitted for planned delivery at a hospital.<br><br>Universal screening was carried out.                                                                                                         | Mothers were diagnosed by RT-PCRs 3-5 days before admission.                     |                                |                                                                                                                                                                                                                        |                |
| Cerbuló-Vázquez A, 2020 Mexico | Prospective cohort   | 11 women<br><br>6 mothers with confirmed COVID-19   | All women admitted.<br><br>It is unclear how testing was carried out.<br><br>3 groups:<br>1) Non-pregnant women without COVID-19<br>2) Non-pregnant women with COVID-19<br>3) Pregnant women with COVID-19 | Mothers were diagnosed by RT-PCRs and clinical characteristics.                  | Age, cough, myalgia            | COVID-related: all-cause mortality, COVID-specific mortality, invasive and non-invasive ventilation, severe pneumonia<br><br>Pregnancy-related: gestational diabetes, mode of delivery – caesarean section and vaginal | Neonatal death |
| Cosma S (1), 2020 Italy        | Prospective cohort   | 134 women<br><br>14 mothers with confirmed COVID-19 | All consecutive pregnant women in the first trimester presenting at a hospital for foetal nuchal translucency measurement.<br><br>Universal screening was carried out.                                     | Mothers were diagnosed by nasopharyngeal swabs.                                  | Age, BMI, smoking, any symptom |                                                                                                                                                                                                                        |                |
| Dodesini AR, 2020 Italy        | Retrospective cohort | 14 women<br><br>2 mothers with confirmed COVID-19   | All women with pre-existing diabetes (type 1 or type 2) seen at the diabetic and pregnancy clinic of a hospital.<br><br>Universal screening was carried out.                                               | Mothers were diagnosed by COVID-19 swabs.<br><br>Method of diagnosis is unclear. |                                |                                                                                                                                                                                                                        |                |

|                            |                    |                                                                                                   |    |                                                                                                                                                                                                                                 |                                                                                                                                                                                                                                                                                                                                                             |                                                                                                                                                                    |                |
|----------------------------|--------------------|---------------------------------------------------------------------------------------------------|----|---------------------------------------------------------------------------------------------------------------------------------------------------------------------------------------------------------------------------------|-------------------------------------------------------------------------------------------------------------------------------------------------------------------------------------------------------------------------------------------------------------------------------------------------------------------------------------------------------------|--------------------------------------------------------------------------------------------------------------------------------------------------------------------|----------------|
| Farhat AS, 2020 Iran       | Prospective cohort | 25 women<br>25 mothers with suspected or confirmed COVID-19<br>20 mothers with confirmed COVID-19 | 25 | All symptomatic women admitted to maternity centres for labour and delivered.<br><br>Testing was carried out on symptomatic patients presenting with fever, cough and respiratory problems or past exposure to a COVID-19 case. | Laboratory-confirmed mothers were diagnosed by pharyngeal swabs.<br><br>Clinically-diagnosed mothers were diagnosed on suspicion despite negative tests. Method of diagnosis for suspected cases is not clear.<br><br>Newborns were diagnosed by RT-PCRs on pharyngeal swabs or tracheal tube sample if suspected of infection due to respiratory symptoms. | COVID-related: all-cause mortality, COVID-specific mortality<br><br>Pregnancy-related: preterm and term delivery, mode of delivery – caesarean section and vaginal | Neonatal death |
| Ferrazzi E (2), 2020 Italy | Prospective cohort | 1566 women<br>49 mothers with confirmed COVID-19                                                  |    | All consecutive women admitted for delivery at Maternity hospitals.<br><br>Universal screening was carried out.                                                                                                                 | Followed diagnostic criteria according to Italian National Procedures.<br><br>Mothers were diagnosed by nasopharyngeal swabs.                                                                                                                                                                                                                               |                                                                                                                                                                    |                |

|                       |                      |                                                      |      |                                                                                                                                                                                                                                                          |                                                                                                                                                                           |             |                                                                                                          |            |
|-----------------------|----------------------|------------------------------------------------------|------|----------------------------------------------------------------------------------------------------------------------------------------------------------------------------------------------------------------------------------------------------------|---------------------------------------------------------------------------------------------------------------------------------------------------------------------------|-------------|----------------------------------------------------------------------------------------------------------|------------|
| Flannery DD, 2020 USA | Prospective cohort   | 1293 women<br><br>80 mothers with confirmed COVID-19 | 1282 | All women admitted for delivery at two hospitals.<br><br>Testing was initially carried out on symptomatic patients or those with known risk factors from 4 <sup>th</sup> -12 <sup>th</sup> April. Universal screening started on 13 <sup>th</sup> April. | Mothers were diagnosed by serology IgM/IgG testing for SARS-CoV-2 during admission. Most were also tested with nasopharyngeal swabs on admission or earlier in pregnancy. |             | Pregnancy-related: preterm delivery, mode of delivery – caesarean section and vaginal                    | Stillbirth |
| Herraiz I, 2020 Spain | Retrospective cohort | 203 women<br><br>2 mothers with confirmed COVID-19   |      | All women admitted to labour and delivery and delivered in a hospital.<br><br>Universal screening was carried out.<br><br>Patients diagnosed with COVID-19 before admission were excluded.                                                               | Mothers were diagnosed by combined nasopharyngeal and oropharyngeal swabs on admission.<br><br>Newborns were also tested. Method of diagnosis is not clear.               | Any symptom | Pregnancy-related: preterm and term delivery, pregnancy-related hypertension, mode of delivery - vaginal |            |
| Khalil A (2), 2020 UK | Prospective cohort   | 1718 women<br><br>19 mothers with confirmed COVID-19 |      | All women admitted and delivered at a hospital.<br><br>Universal screening was carried out.<br><br>Patients with late terminations for foetal abnormalities were excluded.                                                                               | Method of diagnosis is not clear.                                                                                                                                         |             |                                                                                                          | Stillbirth |

|                                 |                      |                                                                      |     |                                                                                                                                                                                                     |                                                                                                                                                                                                                                                        |                                                                                                                               |                                                                                                                                                                                                                                                                            |                                                                                                          |
|---------------------------------|----------------------|----------------------------------------------------------------------|-----|-----------------------------------------------------------------------------------------------------------------------------------------------------------------------------------------------------|--------------------------------------------------------------------------------------------------------------------------------------------------------------------------------------------------------------------------------------------------------|-------------------------------------------------------------------------------------------------------------------------------|----------------------------------------------------------------------------------------------------------------------------------------------------------------------------------------------------------------------------------------------------------------------------|----------------------------------------------------------------------------------------------------------|
| Masmejan S, 2020<br>Switzerland | Retrospective cohort | 13 women<br><br>13<br>mothers<br>with<br>confirmed<br>COVID-<br>19   | 13  | All laboratory-confirmed women admitted and delivered after 24 weeks of gestation at a hospital. Patients had contact with confirmed cases of COVID-19.<br><br>Universal screening was carried out. | Mothers were diagnosed by nasopharyngeal swabs or serology IgG testing for SARS-CoV-2 on admission.<br><br>Newborns were diagnosed by nasopharyngeal swabs.                                                                                            | Age, parity                                                                                                                   | COVID-related: all-cause mortality, COVID-specific mortality, acute respiratory distress syndrome, invasive ventilation, coagulopathy, admission to ICU, severe pneumonia<br><br>Pregnancy-related: gestational diabetes, mode of delivery – caesarean section and vaginal | Neonatal asphyxia, admission to NICU, birthweight, Apgar scores at 1 minute and 5 minutes, cord blood pH |
| Nayak AH, 2020 India            | Retrospective cohort | 977 women<br><br>141<br>mothers<br>with<br>confirmed<br>COVID-<br>19 | 134 | All women who were in labour or who had an abortion or an ectopic pregnancy in the department of obstetrics and gynaecology at a hospital.<br><br>Universal screening was carried out.              | Followed the diagnostic criteria according to Indian Council of Medical Research.<br><br>Mothers were diagnosed by nasopharyngeal swabs on presentation to the labour room.<br><br>Newborns were diagnosed by swabs taken within 24 hours of delivery. | Age, parity                                                                                                                   | COVID-related: all-cause mortality, sepsis, acute renal injury<br><br>Pregnancy-related: induced abortion, mode of delivery – caesarean section and vaginal, gestational diabetes, pregnancy-induced hypertension, antepartum haemorrhage, postpartum haemorrhage          | Stillbirth, admission to NICU, birthweight                                                               |
| Prabhu M, 2020 USA              | Prospective cohort   | 675 women<br><br>70<br>mothers<br>with<br>confirmed<br>COVID-<br>19  | 687 | All consecutive women greater than 20 weeks of gestation admitted to labour and delivery at three hospitals.<br><br>Universal screening was carried out.                                            | Mothers were diagnosed by nasopharyngeal swabs on admission to labour and delivery.<br><br>Newborns from COVID-19 positive mothers                                                                                                                     | Any symptom, ethnicity, hypertension, pre-eclampsia, diabetes, gestational diabetes, asthma, BMI, smoking, multiple pregnancy | COVID-related: all-cause mortality, invasive and non-invasive ventilation, oxygenation, admission to ICU, delirium<br><br>Pregnancy-related: preterm delivery, induced abortion,                                                                                           | Stillbirth, admission to NICU, birthweight, Apgar score at 5 minutes                                     |

|                      |                    |                                                                                                    |    |                                                                                                                                                                                                                   |                                                                                                                                                                                                                                                                                                                                                                                                                                                                           |                                                                                                                                                                                                                                                                                                                                                   |                                                                                                                                                                                      |
|----------------------|--------------------|----------------------------------------------------------------------------------------------------|----|-------------------------------------------------------------------------------------------------------------------------------------------------------------------------------------------------------------------|---------------------------------------------------------------------------------------------------------------------------------------------------------------------------------------------------------------------------------------------------------------------------------------------------------------------------------------------------------------------------------------------------------------------------------------------------------------------------|---------------------------------------------------------------------------------------------------------------------------------------------------------------------------------------------------------------------------------------------------------------------------------------------------------------------------------------------------|--------------------------------------------------------------------------------------------------------------------------------------------------------------------------------------|
|                      |                    |                                                                                                    |    |                                                                                                                                                                                                                   | were diagnosed by nasopharyngeal swabs on delivery at the start of the study. Time of collection was changed later at 24 hours of life.                                                                                                                                                                                                                                                                                                                                   | preterm-premature rupture of membranes, gestational diabetes, mode of delivery – caesarean section and vaginal, postpartum haemorrhage, pregnancy-induced hypertension                                                                                                                                                                            |                                                                                                                                                                                      |
| Sahin D, 2020 Turkey | Prospective cohort | 100 women<br>37 mothers with suspected or confirmed COVID-19<br>29 mothers with confirmed COVID-19 | 18 | All laboratory-confirmed or clinically-diagnosed women admitted to a hospital.<br><br>It is unclear how testing was carried out.<br><br>Patients diagnosed with other respiratory tract infections were excluded. | Laboratory-confirmed mothers were diagnosed by nasopharyngeal and oropharyngeal swabs.<br><br>Clinically-diagnosed mothers were diagnosed by significant clinical features (fever, oxygen saturation less than or equal to 93%, etc.) and/or radiological findings (e.g. ground-glass appearance, mixed consolidation, etc.) but with negative test results.<br><br>Newborns were diagnosed by nasopharyngeal and oropharyngeal swabs at several time points after birth. | COVID-related: all-cause mortality, COVID-specific mortality, invasive and non-invasive ventilation, oxygenation, admission to ICU, severe pneumonia, length of hospital stay<br><br>Pregnancy-related: preterm delivery, preterm-premature rupture of membranes, mode of delivery- caesarean section and vaginal, pregnancy-induced hypertension | Stillbirth, foetal distress, foetal growth restriction, admission to NICU, congenital malformation, gestational age at delivery, birthweight, Apgar scores at 1 minute and 5 minutes |

|                           |                      |                                                      |   |                                                                                                                                                                                                       |                                                                                                                                                                                                                                                               |                                           |                                                                                                                       |
|---------------------------|----------------------|------------------------------------------------------|---|-------------------------------------------------------------------------------------------------------------------------------------------------------------------------------------------------------|---------------------------------------------------------------------------------------------------------------------------------------------------------------------------------------------------------------------------------------------------------------|-------------------------------------------|-----------------------------------------------------------------------------------------------------------------------|
| Santos RR, 2020 Portugal  | Prospective cohort   | 428 women<br><br>2 mothers with confirmed COVID-19   | 2 | All women admitted to a hospital.<br><br>Universal screening was carried out.                                                                                                                         | Mothers were diagnosed by nasopharyngeal and oropharyngeal swabs on admission. Those with a scheduled caesarean section and labour induction were tested a day before admission.<br><br>Newborns were diagnosed by RT-PCRs within the first 24 hours of life. |                                           | Pregnancy-related: mode of delivery – caesarean section and vaginal, induction of labour                              |
| Takemoto MLS, 2020 Brazil | Retrospective cohort | 978 women<br><br>978 mothers with confirmed COVID-19 |   | All pregnant and postpartum women with COVID-19 identified in the Brazilian Acute Respiratory Distress Syndrome Surveillance System.<br><br>Testing was carried out on patients with severe symptoms. | Method of diagnosis is unclear.                                                                                                                                                                                                                               | Age, pregnant, ethnicity, obesity, asthma | COVID-related: all-cause mortality, COVID-specific mortality, invasive and non-invasive ventilation, admission to ICU |
| Yassa M (2), 2020 Turkey  | Prospective cohort   | 296 women<br><br>23 mothers with confirmed           |   | All consecutive women with confirmed pregnancy at any gestational week admitted to the obstetric unit for any indication at a hospital.                                                               | Mothers were diagnosed by nasopharyngeal swabs.                                                                                                                                                                                                               |                                           |                                                                                                                       |

|                                  |                      |                                                            |                                                                                                                                                                                                                                                                                                                                                                                                        |                                                 |                                                                                              |                                                                                                                                |
|----------------------------------|----------------------|------------------------------------------------------------|--------------------------------------------------------------------------------------------------------------------------------------------------------------------------------------------------------------------------------------------------------------------------------------------------------------------------------------------------------------------------------------------------------|-------------------------------------------------|----------------------------------------------------------------------------------------------|--------------------------------------------------------------------------------------------------------------------------------|
|                                  |                      | COVID-19                                                   | <p>Universal screening was carried out.</p> <p>Women with previously confirmed COVID-19 infection were excluded. Women who refused a lung ultrasound, were referred from external hospitals or transferred through the emergency ambulance services were also excluded.</p>                                                                                                                            |                                                 |                                                                                              |                                                                                                                                |
| ROUND 8                          |                      |                                                            |                                                                                                                                                                                                                                                                                                                                                                                                        |                                                 |                                                                                              |                                                                                                                                |
| Badr DA, 2020 France and Belgium | Retrospective cohort | <p>190 women</p> <p>83 mothers with confirmed COVID-19</p> | <p>All laboratory-confirmed women of reproductive age admitted for COVID-related complications at four hospitals.</p> <p>It is unclear how testing was carried out.</p> <p>2 groups<br/>1) Pregnant women (more than or equal to 20 gestational weeks) with COVID-19<br/>2) Non-pregnant women with COVID-19</p> <p>Women admitted for other reasons besides clinical deterioration were excluded.</p> | Mothers were diagnosed by nasopharyngeal swabs. | Fever, cough, breathlessness, myalgia, lymphopenia, age, diabetes, hypertension, asthma, BMI | COVID-related: all-cause mortality, COVID-specific mortality, invasive ventilation, admission to ICU and hospital, oxygenation |
| Cronin S, 2020 USA               | Retrospective cohort | <p>114 women</p> <p>11 mothers with confirmed COVID-19</p> | <p>All women admitted to the labour and delivery unit at a hospital.</p> <p>Universal screening was carried out.</p>                                                                                                                                                                                                                                                                                   | Method of diagnosis is unclear.                 |                                                                                              |                                                                                                                                |



|                                   |                      |                                                                         |    |                                                                                                                                                                                                                                                                                                                                |                                                          |                             |                                                                                                                                                                                                                                                                                                                                       |                                                                                         |
|-----------------------------------|----------------------|-------------------------------------------------------------------------|----|--------------------------------------------------------------------------------------------------------------------------------------------------------------------------------------------------------------------------------------------------------------------------------------------------------------------------------|----------------------------------------------------------|-----------------------------|---------------------------------------------------------------------------------------------------------------------------------------------------------------------------------------------------------------------------------------------------------------------------------------------------------------------------------------|-----------------------------------------------------------------------------------------|
| de Souza Santos D, 2020<br>Brazil | Retrospective cohort | 669<br>women<br><br>669<br>mothers<br>with<br>confirmed<br>COVID-<br>19 |    | All pregnant and postpartum<br>women with COVID-19 and<br>complete data on ethnicity<br>reported in the Brazilian<br>Acute Respiratory Distress<br>Syndrome Surveillance<br>System.<br><br>It is unclear how testing was<br>carried out.<br><br>2 groups<br>1) Black women with<br>COVID-19<br>2) White women with<br>COVID-19 | Method of<br>diagnosis is<br>unclear.                    | Ethnicity                   | COVID-related: all-<br>cause mortality,<br>invasive ventilation,<br>admission to ICU                                                                                                                                                                                                                                                  |                                                                                         |
| Emeruwa U (1), 2020 USA           | Retrospective cohort | 673<br>women<br><br>100<br>mothers<br>with<br>confirmed<br>COVID-<br>19 | 99 | All women delivered at two<br>hospitals.<br><br>Testing was initially carried<br>out on symptomatic patients.<br>Universal screening started<br>on 22 <sup>nd</sup> March.<br><br>4 racial-ethnic groups<br>1) non-Hispanic black<br>women<br>2) non-Hispanic white<br>women<br>3) Hispanic women<br>4) Other                  | Mothers were<br>diagnosed by<br>nasopharyngeal<br>swabs. | Ethnicity                   | COVID-related:<br>pneumonia,<br>admission to<br>hospital, severe<br>pneumonia,<br>oxygenation<br><br>Pregnancy-related:<br>miscarriage, preterm<br>delivery, gestational<br>diabetes, mode of<br>delivery – caesarean<br>section and vaginal,<br>chorioamnionitis,<br>postpartum<br>haemorrhage,<br>pregnancy-induced<br>hypertension | Apgar score at<br>5minute,<br>birthweight,<br>gestational age at<br>delivery            |
| Hecht J, 2020 USA                 | Retrospective cohort | 19 women<br><br>19<br>mothers<br>with<br>confirmed<br>COVID-<br>19      | 21 | All laboratory-confirmed<br>women with delivered<br>placentas reported from three<br>hospitals.<br><br>It is unclear how testing was<br>carried out.                                                                                                                                                                           | Mothers were<br>diagnosed by<br>nasopharyngeal<br>swabs. | Age, parity, any<br>symptom | COVID-related: all-<br>cause mortality,<br>pneumonia, invasive<br>ventilation,<br>oxygenation, severe<br>pneumonia<br><br>Pregnancy-related:<br>preterm delivery,<br>preterm-premature<br>rupture of<br>membranes, mode of                                                                                                            | Stillbirth,<br>neonatal death,<br>admission to<br>NICU, foetal<br>growth<br>restriction |

|                            |                      |                                                                                                   |    |                                                                                                                                                                                                           |                                                                                                                                                                                                                              |                                                                          |                                                                                                                                                                                                                                                                                                                                              |                                                                                                                                                                                            |
|----------------------------|----------------------|---------------------------------------------------------------------------------------------------|----|-----------------------------------------------------------------------------------------------------------------------------------------------------------------------------------------------------------|------------------------------------------------------------------------------------------------------------------------------------------------------------------------------------------------------------------------------|--------------------------------------------------------------------------|----------------------------------------------------------------------------------------------------------------------------------------------------------------------------------------------------------------------------------------------------------------------------------------------------------------------------------------------|--------------------------------------------------------------------------------------------------------------------------------------------------------------------------------------------|
|                            |                      |                                                                                                   |    |                                                                                                                                                                                                           |                                                                                                                                                                                                                              |                                                                          | delivery – caesarean section and vaginal, pregnancy-induced hypertension, gestational diabetes                                                                                                                                                                                                                                               |                                                                                                                                                                                            |
| Huerta Saenz IH, 2020 Peru | Retrospective cohort | 316 women<br>41 mothers with confirmed COVID-19                                                   | 41 | All women admitted to obstetrics and gynaecology emergency department at a hospital.<br><br>Universal screening was carried out.                                                                          | Mothers were diagnosed by serology IgG/IgM testing for SARS-CoV-2 or nasopharyngeal swabs.<br><br>Newborns were diagnosed by RT-PCRs.                                                                                        |                                                                          | COVID-related: all-cause mortality, COVID-specific mortality, pneumonia, invasive and non-invasive ventilation, admission to ICU, length of ICU stay, severe pneumonia<br><br>Pregnancy-related: preterm and term delivery, mode of delivery – caesarean section and vaginal, premature rupture of membranes, pregnancy-induced hypertension | Apgar scores at 1 minute and 5 minutes, birthweight                                                                                                                                        |
| Peng S, 2020 China         | Prospective cohort   | 64 women<br>43 mothers with suspected or confirmed COVID-19<br>24 mothers with confirmed COVID-19 | 47 | All women with or without COVID-19 admitted for delivery or pregnancy complications.<br><br>3 groups<br>1) Women with confirmed COVID-19<br>2) Women with suspected COVID-19<br>3) Women without COVID-19 | Followed diagnostic criteria according to National Health Commission of China.<br><br>Laboratory-confirmed mothers were diagnosed by throat swabs or serology IgG/IgM testing for SARS-CoV-2 with at least one symptom (e.g. | Age, pre-eclampsia, pregnancy induced hypertension, gestational diabetes | COVID-related: severe pneumonia, length of hospital stay, time of illness onset to outcome<br><br>Pregnancy-related: preterm delivery, gestational diabetes, mode of delivery – caesarean section and vaginal, pregnancy-induced hypertension, premature rupture of membranes                                                                | Neonatal death, neonatal asphyxia, foetal growth restriction, foetal distress, small-for-gestational age, gestational age at delivery, birthweight, Apgar scores at 1 minute and 5 minutes |

|                           |                    |                                                 |    |                                                                                                                                                                                                            |                                                                                                                                                                                                                                                                      |                                                                                                   |                                                                                                                                |                                                                                                     |
|---------------------------|--------------------|-------------------------------------------------|----|------------------------------------------------------------------------------------------------------------------------------------------------------------------------------------------------------------|----------------------------------------------------------------------------------------------------------------------------------------------------------------------------------------------------------------------------------------------------------------------|---------------------------------------------------------------------------------------------------|--------------------------------------------------------------------------------------------------------------------------------|-----------------------------------------------------------------------------------------------------|
|                           |                    |                                                 |    |                                                                                                                                                                                                            | <p>fever, respiratory symptoms, chest CT, etc.).</p> <p>Clinically-diagnosed mothers were those under suspicion but had negative RT-PCR and serological tests.</p> <p>Mothers without COVID-19 were those without symptoms, normal chest CT and negative RT-PCR.</p> |                                                                                                   |                                                                                                                                |                                                                                                     |
| Pissarra S, 2020 Portugal | Prospective cohort | 10 women<br>10 mothers with confirmed COVID-19  | 10 | <p>All laboratory-confirmed women admitted to the maternity unit and delivered at a hospital.</p> <p>Universal screening was carried out.</p>                                                              | <p>Mothers were diagnosed by nasopharyngeal and oropharyngeal swabs.</p> <p>Newborns were diagnosed by nasopharyngeal swabs and bronchial secretion samples at birth and 48 hours of life.</p>                                                                       | <p>Age, parity, trimester, support person positive, any symptom, fever, cough, breathlessness</p> | <p>COVID-related: oxygenation, admission to ICU</p> <p>Pregnancy-related: mode of delivery – caesarean section and vaginal</p> | <p>Admission to NICU, birthweight, gestational age at delivery, length of stay in neonatal unit</p> |
| Reforma LG, 2020 USA      | Prospective cohort | 135 women<br>22 mothers with confirmed COVID-19 |    | <p>All pregnant and recently-postpartum (defined as less than or equal to 6 weeks) women received prenatal care at a hospital and affiliated practices with symptoms, exposures or confirmed COVID-19.</p> | <p>Most mothers were diagnosed by RT-PCRs.</p>                                                                                                                                                                                                                       |                                                                                                   | <p>COVID-related: admission to hospital, secondary infection</p> <p>Pregnancy-related: pregnancy-induced hypertension</p>      |                                                                                                     |

|                           |                      |                                                       |     |                                                                                                                                                                                                                                                                                                                                    |                                                                                                                                                                                                       |                                                                                                |                                                             |
|---------------------------|----------------------|-------------------------------------------------------|-----|------------------------------------------------------------------------------------------------------------------------------------------------------------------------------------------------------------------------------------------------------------------------------------------------------------------------------------|-------------------------------------------------------------------------------------------------------------------------------------------------------------------------------------------------------|------------------------------------------------------------------------------------------------|-------------------------------------------------------------|
|                           |                      |                                                       |     | Testing was carried out on symptomatic patients and/or those with past exposure.                                                                                                                                                                                                                                                   |                                                                                                                                                                                                       |                                                                                                |                                                             |
| Salvatore CM, 2020 USA    | Prospective cohort   | 1481 women<br><br>106 mothers with confirmed COVID-19 | 106 | All laboratory-confirmed women admitted for delivery and have their newborns at three hospitals.<br><br>Universal screening was carried out.                                                                                                                                                                                       | Mothers were diagnosed by nasopharyngeal swabs at delivery.<br><br>Newborns were diagnosed by nasopharyngeal swabs at multiple time points (12-24 hours, 5-7 days, 14 days and at subsequent visits). | Pregnancy-related: preterm and term delivery, mode of delivery – caesarean section and vaginal | Admission to NICU, gestational age at delivery, birthweight |
| Semeshkin AA, 2020 Russia | Retrospective cohort | 20 women<br><br>20 mothers with confirmed COVID-19    | 21  | All laboratory-confirmed women between 19 and 39 years admitted to the maternity unit with mild or moderate clinical symptoms and delivered newborn(s) at a hospital.<br><br>Universal screening was carried out.<br><br>Women with acute respiratory infections not caused by SARS-CoV-2 and had a negative result were excluded. | Mothers were diagnosed by RT-PCRs on admission.<br><br>Newborns were diagnosed by RT-PCRs on first or second day of life.                                                                             | Pregnancy-related: mode of delivery – caesarean section and vaginal                            | Apgar scores at 1 minute and 5 minutes                      |

|                        |                      |                                                  |     |                                                                                                                                                                                                                                                                                                                                                          |                                                                                                                                                                                                                                |                                                                                               |                                                                                                                                                                                                                                                                                                |                                                                                                                                                                                                                       |
|------------------------|----------------------|--------------------------------------------------|-----|----------------------------------------------------------------------------------------------------------------------------------------------------------------------------------------------------------------------------------------------------------------------------------------------------------------------------------------------------------|--------------------------------------------------------------------------------------------------------------------------------------------------------------------------------------------------------------------------------|-----------------------------------------------------------------------------------------------|------------------------------------------------------------------------------------------------------------------------------------------------------------------------------------------------------------------------------------------------------------------------------------------------|-----------------------------------------------------------------------------------------------------------------------------------------------------------------------------------------------------------------------|
| Smithgall MC, 2020 USA | Retrospective cohort | 76 women<br>51 mothers with confirmed COVID-19   | 76  | All women with singleton pregnancies in their third trimesters presented to the labour and delivery unit and delivered.<br><br>It is unclear how testing was carried out.<br><br>2 groups<br>1) Women with positive RT-PCR results<br>2) Women with negative RT-PCR results                                                                              | Mothers were diagnosed by nasopharyngeal swabs in the labour and delivery unit.<br><br>Newborns born to laboratory-confirmed mothers were diagnosed by nasopharyngeal swabs straight after birth.                              | Any symptom, any comorbidity                                                                  | COVID-related: all-cause mortality, COVID-specific mortality, invasive ventilation, oxygenation, severe pneumonia<br><br>Pregnancy-related: preterm and term delivery, mode of delivery – caesarean section and vaginal                                                                        | Neonatal death, Apgar score at 5 minutes                                                                                                                                                                              |
| Tanacan A, 2020 Turkey | Prospective cohort   | 206 women<br>3 mothers with confirmed COVID-19   |     | All asymptomatic women admitted for delivery at a hospital.<br><br>Universal screening was carried out.<br><br>2 groups<br>1) Low-risk pregnancy group with no defined risk factors<br>2) High-risk pregnancy group                                                                                                                                      | Mothers were diagnosed by nasopharyngeal and oropharyngeal swabs on admission.                                                                                                                                                 |                                                                                               |                                                                                                                                                                                                                                                                                                |                                                                                                                                                                                                                       |
| Verma S (1), 2020 USA  | Retrospective cohort | 149 women<br>149 mothers with confirmed COVID-19 | 152 | All laboratory-confirmed women who delivered at four hospitals and have their newborn(s).<br><br>Testing was initially carried on symptomatic patients or those with past exposure. Universal screening was started at different time points for each site.<br><br>2 groups<br>1) Asymptomatic women with COVID-19<br>2) Symptomatic women with COVID-19 | Mothers were diagnosed by nasopharyngeal swabs on presentation to the labour and delivery unit.<br><br>Newborns were diagnosed by nasopharyngeal swabs. Majority had one test after birth with some having an additional test. | Age, any symptom, BMI, asthma, diabetes, gestational diabetes, pregnancy-induced hypertension | COVID-related: all-cause mortality, invasive and non-invasive ventilation, oxygenation, coagulopathy, admission to ICU<br><br>Pregnancy-related: preterm delivery, mode of delivery – caesarean section and vaginal, gestational diabetes, pregnancy-induced hypertension, induction of labour | Stillbirth, neonatal death, admission to NICU, foetal distress, gestational age at delivery, Apgar scores at 1 minute and 5 minutes, birthweight, small-for-gestational-age, large-for-gestational-age, cord blood pH |

|                     |                      |                                                                                                   |    |                                                                                                                                                                                                                                                                                                                     |                                                                                                                                                                                                                                                                                                                                                   |                                                                                                                           |                                                                                                                                                                                                             |                                    |
|---------------------|----------------------|---------------------------------------------------------------------------------------------------|----|---------------------------------------------------------------------------------------------------------------------------------------------------------------------------------------------------------------------------------------------------------------------------------------------------------------------|---------------------------------------------------------------------------------------------------------------------------------------------------------------------------------------------------------------------------------------------------------------------------------------------------------------------------------------------------|---------------------------------------------------------------------------------------------------------------------------|-------------------------------------------------------------------------------------------------------------------------------------------------------------------------------------------------------------|------------------------------------|
| Wu YT, 2020 China   | Retrospective cohort | 29 women<br>29 mothers with suspected or confirmed COVID-19<br>13 mothers with confirmed COVID-19 | 30 | All women diagnosed with COVID-19 who delivered at three hospitals and have their newborn(s).<br><br>It is unclear how testing was carried out.                                                                                                                                                                     | Followed diagnostic criteria according to National Health Commission of China.<br><br>Laboratory-confirmed mothers were diagnosed by throat swabs.<br><br>Clinically-diagnosed mothers were diagnosed by chest CT findings.<br><br>Hospitalised newborns were diagnosed by throat swabs along with SARS-CoV-2 serology and radiological findings. | Parity, fever, cough, breathlessness, diarrhoea, pregnancy-induced hypertension, gestational diabetes, multiple pregnancy | COVID-related: pneumonia, invasive ventilation, admission to ICU<br><br>Pregnancy-related: preterm-premature rupture of membranes, mode of delivery – caesarean section and vaginal, postpartum haemorrhage | Admission to NICU, foetal distress |
| ROUND 9             |                      |                                                                                                   |    |                                                                                                                                                                                                                                                                                                                     |                                                                                                                                                                                                                                                                                                                                                   |                                                                                                                           |                                                                                                                                                                                                             |                                    |
| Bender WR, 2020 USA | Retrospective cohort | 318 women<br>8 mothers with confirmed COVID-19                                                    |    | All asymptomatic women presenting for delivery or for other obstetric indications but considered likely to deliver at two hospitals.<br><br>Universal screening was carried out.<br><br>Women who declined testing were excluded. Women with viral symptoms, known SARS-CoV-2 exposure or had a past positive SARS- | Mothers were diagnosed by nasopharyngeal and oropharyngeal swabs on admission.<br><br>Newborns were tested at 24 hours of life and at discharge.                                                                                                                                                                                                  |                                                                                                                           |                                                                                                                                                                                                             | Stillbirth                         |

CoV-2 test were also excluded.

|                         |                    |                                                |    |                                                                                                                                                                                                                                                                                                                                                                                                                     |                                                                                            |                                   |                                                                                                                                                                                           |                                                                                                                                                                                                             |
|-------------------------|--------------------|------------------------------------------------|----|---------------------------------------------------------------------------------------------------------------------------------------------------------------------------------------------------------------------------------------------------------------------------------------------------------------------------------------------------------------------------------------------------------------------|--------------------------------------------------------------------------------------------|-----------------------------------|-------------------------------------------------------------------------------------------------------------------------------------------------------------------------------------------|-------------------------------------------------------------------------------------------------------------------------------------------------------------------------------------------------------------|
| Bertino E, 2020 Italy   | Prospective cohort | 12 women<br>12 mothers with confirmed COVID-19 | 12 | All breastfeeding women with laboratory-confirmed COVID-19 from study centres in North-West Italy.<br><br>It is unclear how testing was carried out.                                                                                                                                                                                                                                                                | Mothers and newborns were diagnosed by nasal and pharyngeal swabs at multiple time points. | Age                               | Pregnancy-related: mode of delivery – caesarean section and vaginal                                                                                                                       |                                                                                                                                                                                                             |
| Facchetti F, 2020 Italy | Prospective cohort | 15 women<br>15 mothers with confirmed COVID-19 | 15 | All laboratory-confirmed women with delivered placentas and newborn(s) admitted at a hospital.<br><br>Testing was initially carried out on patients with positive symptoms, SARS-CoV-2 exposure, positive laboratory or radiological findings. Universal screening was started on 5 <sup>th</sup> May.<br><br>2 groups<br>1) Women with COVID-19 and their newborns<br>2) Women without COVID-19 and their newborns | Mothers and newborns were diagnosed by nasopharyngeal swabs.                               | Any symptom, any comorbidity, age | COVID-related: pneumonia, acute respiratory distress syndrome<br><br>Pregnancy-related: gestational diabetes, postpartum haemorrhage, induction of labour, pregnancy-induced hypertension | Stillbirth, neonatal death, foetal growth restriction, admission to NICU, Apgar scores at 1 minute and 5 minutes, birthweight, respiratory distress syndrome, neonatal infection, necrotising enterocolitis |

|                          |                      |                                                                                                      |    |                                                                                                                                                                                                                                                                                                                                                   |                                                                                                                                                             |                                                                                                                                   |                                                                                                                                                                                    |                                                                     |
|--------------------------|----------------------|------------------------------------------------------------------------------------------------------|----|---------------------------------------------------------------------------------------------------------------------------------------------------------------------------------------------------------------------------------------------------------------------------------------------------------------------------------------------------|-------------------------------------------------------------------------------------------------------------------------------------------------------------|-----------------------------------------------------------------------------------------------------------------------------------|------------------------------------------------------------------------------------------------------------------------------------------------------------------------------------|---------------------------------------------------------------------|
| Gulersen M (1), 2020 USA | Retrospective cohort | 100 women<br>50 mothers with confirmed COVID-19                                                      | 50 | All laboratory-confirmed women with singleton pregnancies who delivered at one centre and had placentas reviewed by pathology.<br><br>Universal screening was carried out.<br><br>2 groups<br>1) All included women<br>2) Historical controls (cohort with placentas reviewed in November 2019)<br><br>Women with placenta accreta were excluded. | Mothers were diagnosed by nasopharyngeal swabs on admission to the labour and delivery unit.<br><br>Newborns were diagnosed by RT-PCRs at 24 hours of life. | Ethnicity, parity, age, gestational diabetes, hypertension, pregnancy-induced hypertension, pre-eclampsia, diabetes, any symptoms | COVID-related: severe pneumonia<br><br>Pregnancy-related: preterm delivery, gestational diabetes, mode of delivery - caesarean section and vaginal, pregnancy-induced hypertension | Foetal growth restriction, gestational age at delivery, birthweight |
| Li M (1), 2020 China     | Retrospective cohort | 13 women<br>13 mothers with suspected or confirmed COVID-19<br><br>2 mothers with confirmed COVID-19 |    | All women delivered at a birth centre.<br><br>Testing was carried out on symptomatic patients.<br><br>Women with a gestational age less than 28 weeks or had an intrauterine foetal death were excluded.                                                                                                                                          | Laboratory-confirmed mothers were diagnosed by throat swabs.<br><br>Clinically-diagnosed mothers were diagnosed by chest CT scans.                          |                                                                                                                                   | Pregnancy-related: mode of delivery – caesarean section and vaginal                                                                                                                |                                                                     |
| Maru S, 2020 USA         | Retrospective cohort | 124 women<br>46 mothers with confirmed COVID-19                                                      | 38 | All women admitted to the labour and delivery unit at a hospital.<br><br>Universal screening was carried out.<br><br>2 groups<br>1) Women with positive SARS-CoV-2 results<br>2) Women with negative SARS-CoV-2 results                                                                                                                           | Mothers were diagnosed by nasopharyngeal swabs on admission.                                                                                                | Age, any comorbidity, smoking                                                                                                     | COVID-related: all-cause mortality, length of hospital stay<br><br>Pregnancy-related: preterm and term delivery, mode of delivery – caesarean section and vaginal                  |                                                                     |



|                        |                      |                                                     |     |                                                                                                                                                                                                                                                                                                                              |                                                                                                                                                                                |                                                                                                     |                                                                                                                                                                                                                               |                                                                                                                                                                                |
|------------------------|----------------------|-----------------------------------------------------|-----|------------------------------------------------------------------------------------------------------------------------------------------------------------------------------------------------------------------------------------------------------------------------------------------------------------------------------|--------------------------------------------------------------------------------------------------------------------------------------------------------------------------------|-----------------------------------------------------------------------------------------------------|-------------------------------------------------------------------------------------------------------------------------------------------------------------------------------------------------------------------------------|--------------------------------------------------------------------------------------------------------------------------------------------------------------------------------|
|                        |                      |                                                     |     | Women with invalid test results were excluded.                                                                                                                                                                                                                                                                               |                                                                                                                                                                                |                                                                                                     |                                                                                                                                                                                                                               |                                                                                                                                                                                |
| Nambiar SS, 2020 India | Retrospective cohort | 12 women<br>6<br>12 mothers with confirmed COVID-19 |     | All laboratory-confirmed women admitted to a hospital.<br><br>It is unclear how testing was carried out.                                                                                                                                                                                                                     | Mothers were diagnosed by nasopharyngeal swabs.<br><br>Newborns were diagnosed by oropharyngeal swabs.                                                                         | Any symptom, fever, parity                                                                          | COVID-related: severe pneumonia<br><br>Pregnancy-related: miscarriage, mode of delivery – caesarean section and vaginal                                                                                                       | Foetal distress                                                                                                                                                                |
| Oncel MY, 2020 Turkey  | Prospective cohort   | 125 women<br>125 mothers with confirmed COVID-19    | 125 | All laboratory-confirmed women admitted and delivered at multiple centres with newborns in NICUs.<br><br>Testing was carried out on symptomatic patients and/or those with past contact with COVID-19 case.<br><br>2 groups<br>1) Newborns with COVID-19 and their mothers<br>2) Newborns without COVID-19 and their mothers | Mothers were diagnosed by RT-PCRs.<br><br>Newborns were diagnosed by nasopharyngeal/pharyngeal swabs after birth and then every 2 days until two negative consecutive results. | Gestational diabetes, any comorbidity, pre-eclampsia, chronic hypertension, smoking                 | COVID-related: all-cause mortality, invasive ventilation, admission to ICU<br><br>Pregnancy-related: preterm delivery, mode of delivery – caesarean section and vaginal, gestational diabetes, pregnancy-induced hypertension | Neonatal death, gestational age at delivery, birthweight – low birthweight defined as less than 2500g, Apgar scores at 1 minute and 5 minutes, length of stay in neonatal unit |
| Sakowicz A, 2020 USA   | Retrospective cohort | 1418 women<br>101 mothers with confirmed COVID-19   |     | All women admitted for delivery to labour and delivery or antepartum units at a hospital and its affiliated outpatient clinics.<br><br>Testing was initially carried out on patients with clinical suspicion of COVID-19. Universal screening was started after 8 <sup>th</sup> April.                                       | Mothers were diagnosed by nasopharyngeal swabs upon presentation to the hospital. Those with scheduled admissions were tested 12-36 hours before.                              | Age, ethnicity, BMI, smoking, any comorbidity, diabetes, hypertension, gestational diabetes, parity | Pregnancy-related: gestational diabetes                                                                                                                                                                                       |                                                                                                                                                                                |

|                               |                      |                                                                                                              |    | 2 groups<br>1) Women with positive SARS-CoV-2 test results<br>2) Women with negative SARS-CoV-2 test results                                                                                                                                                                    |                                                                                                                                                                                             |                                      |                                                                                                                                                                                                    |                                 |
|-------------------------------|----------------------|--------------------------------------------------------------------------------------------------------------|----|---------------------------------------------------------------------------------------------------------------------------------------------------------------------------------------------------------------------------------------------------------------------------------|---------------------------------------------------------------------------------------------------------------------------------------------------------------------------------------------|--------------------------------------|----------------------------------------------------------------------------------------------------------------------------------------------------------------------------------------------------|---------------------------------|
| Sola A, 2020 Latin America    | Prospective cohort   | 86 women<br><br>86 mothers with confirmed COVID-19                                                           | 86 | All laboratory-confirmed women who delivered with newborns reported to SIBEN network.<br><br>It is unclear how testing was carried out.                                                                                                                                         | Mothers were diagnosed by RT-PCRs.<br><br>Newborns were diagnosed by RT-PCRs between 16 and 36 hours of life.                                                                               |                                      | COVID-related: all-cause mortality, invasive ventilation, admission to ICU, severe pneumonia<br><br>Pregnancy-related: preterm and term delivery, mode of delivery – caesarean section and vaginal | Neonatal death, neonatal sepsis |
| Takemoto MLS (2), 2020 Brazil | Retrospective cohort | 978 women<br><br>978 mothers with suspected or confirmed COVID-19<br><br>772 mothers with confirmed COVID-19 |    | All pregnant and postpartum women diagnosed with COVID-19 and final outcome recorded in the Brazilian Acute Respiratory Distress Syndrome Surveillance System.<br><br>It is unclear how testing was carried out.<br><br>2 groups<br>1) Women who died<br>2) Women who recovered | Laboratory-confirmed mothers were diagnosed by nasopharyngeal swabs or serology for SARS-CoV-2.<br><br>Clinically-diagnosed mothers were diagnosed by epidemiological or clinical findings. | Trimester, diabetes, any comorbidity | COVID-related: all-cause mortality, admission to ICU, invasive and non-invasive ventilation                                                                                                        |                                 |

|                        |                      |                                                                                                  |    |                                                                                                                                                                                                                    |                                                                                                                                                                                                                                                                                     |                                                  |                                                                                                                                             |                                                     |
|------------------------|----------------------|--------------------------------------------------------------------------------------------------|----|--------------------------------------------------------------------------------------------------------------------------------------------------------------------------------------------------------------------|-------------------------------------------------------------------------------------------------------------------------------------------------------------------------------------------------------------------------------------------------------------------------------------|--------------------------------------------------|---------------------------------------------------------------------------------------------------------------------------------------------|-----------------------------------------------------|
| Wang X (1), 2020 China | Retrospective cohort | 26 women<br>26 mothers with suspected or confirmed COVID-19<br>9 mothers with confirmed COVID-19 | 27 | All women diagnosed with COVID-19 and their delivered newborns.<br>It is unclear how testing was carried out.                                                                                                      | Laboratory-confirmed mothers were diagnosed by throat swabs before delivery. Some women also underwent serology testing before delivery.<br><br>Clinically-diagnosed mothers were diagnosed by chest CT.<br><br>Newborns were diagnosed by serology IgM/IgG testing for SARS-CoV-2. |                                                  | Pregnancy-related: preterm and term delivery, mode of delivery – caesarean section and vaginal                                              | Apgar scores at 1 minute and 5 minutes, birthweight |
| Zhang P, 2020 USA      | Retrospective cohort | 364 women<br>74 mothers with confirmed COVID-19                                                  | 74 | All women with delivered placentas submitted to pathology.<br>Universal screening was carried out.<br>2 groups<br>1) Women with positive SARS-CoV-2 test results<br>2) Women with negative SARS-CoV-2 test results | Mothers and newborns were diagnosed by nasopharyngeal swabs.                                                                                                                                                                                                                        | Pre-eclampsia, gestational diabetes, lymphopenia | Pregnancy-related: mode of delivery – caesarean section and vaginal, chorioamnionitis, pregnancy-induced hypertension, gestational diabetes | Neonatal death, foetal growth restriction           |

ROUND 10

|                         |                      |                                                                                                           |    |                                                                                                                                                                                                                                                   |                                                                                                                                                                                                             |                                                                          |                                                                                                                                                                                                                                                                               |                                                                                                                        |
|-------------------------|----------------------|-----------------------------------------------------------------------------------------------------------|----|---------------------------------------------------------------------------------------------------------------------------------------------------------------------------------------------------------------------------------------------------|-------------------------------------------------------------------------------------------------------------------------------------------------------------------------------------------------------------|--------------------------------------------------------------------------|-------------------------------------------------------------------------------------------------------------------------------------------------------------------------------------------------------------------------------------------------------------------------------|------------------------------------------------------------------------------------------------------------------------|
| Blitz MJ (3), 2020 USA  | Retrospective cohort | 4674 women<br><br>500 mothers with confirmed COVID-19                                                     |    | All asymptomatic and symptomatic women presenting to obstetric units at 7 hospitals.<br><br>Universal screening was carried out.<br><br>Women whose results were not available or whose tests were done before universal screening were excluded. | Mothers were diagnosed by nasopharyngeal swabs.                                                                                                                                                             |                                                                          |                                                                                                                                                                                                                                                                               |                                                                                                                        |
| Donadieu D, 2020 France | Prospective cohort   | 34 women<br><br>34 mothers with suspected or confirmed COVID-19<br><br>26 mothers with confirmed COVID-19 | 11 | All women with a term greater than 25 weeks of amenorrhoea admitted to the obstetrics department with COVID-19.<br><br>It is unclear how testing was carried out.                                                                                 | Laboratory-confirmed women were diagnosed by RT-PCRs.<br><br>Clinically-diagnosed women were diagnosed by CT scans.<br><br>Newborns were diagnosed by RT-PCRs.                                              |                                                                          | COVID-related: all-cause mortality, acute respiratory distress syndrome, invasive and non-invasive ventilation, oxygenation, coagulopathy, admission to ICU, length of hospital stay<br><br>Pregnancy-related: preterm delivery, postpartum haemorrhage, gestational diabetes | Neonatal death, gestational age at delivery                                                                            |
| Farghaly MAA, 2020 USA  | Retrospective cohort | 79 women<br><br>15 mothers with confirmed COVID-19                                                        | 79 | All women who were admitted and delivered their newborns at a hospital.<br><br>Universal screening was carried out.<br><br>2 groups<br>1) Women with positive SARS-CoV-2 test results<br>2) Women with negative SARS-CoV-2 test results           | Mothers were diagnosed by nasopharyngeal swabs on admission.<br><br>Newborns born to SARS-CoV-2 positive mothers were diagnosed by nasopharyngeal swabs within 24 hours of life, at 48 hours and at 1 week. | Age, smoking, any comorbidity, fever, cough, breathlessness, any symptom | Pregnancy-related: preterm and term delivery, mode of delivery – caesarean section and vaginal, chorioamnionitis                                                                                                                                                              | Admission to NICU, Apgar scores at 1 minute and 5 minutes, gestational age at delivery, birthweight, neonatal seizures |

|                          |                      |                                                |    |                                                                                                                                                                                                                                                                                                                          |                                                                                                                                                                                                                                                                          |                                                                                                                                                                                                                                                  |                                                                                                                   |
|--------------------------|----------------------|------------------------------------------------|----|--------------------------------------------------------------------------------------------------------------------------------------------------------------------------------------------------------------------------------------------------------------------------------------------------------------------------|--------------------------------------------------------------------------------------------------------------------------------------------------------------------------------------------------------------------------------------------------------------------------|--------------------------------------------------------------------------------------------------------------------------------------------------------------------------------------------------------------------------------------------------|-------------------------------------------------------------------------------------------------------------------|
| Hassan N, 2020 India     | Retrospective cohort | 38 women<br>38 mothers with confirmed COVID-19 | 38 | All laboratory-confirmed women in third trimester admitted to a hospital.<br><br>It is unclear how testing was carried out.<br><br>Non-pregnant women with COVID-19 were excluded. Women with conditions that result in poor maternal and foetal outcomes (e.g. poorly controlled diabetes, hypertension) were excluded. | Mothers and newborns were diagnosed by RT-PCRs.                                                                                                                                                                                                                          | COVID-related: all-cause mortality, admission to ICU<br><br>Pregnancy-related: preterm and term delivery, spontaneous preterm delivery, mode of delivery – caesarean section and vaginal, pregnancy-induced hypertension, antepartum haemorrhage | Stillbirth, neonatal death, admission to NICU, Apgar score at 5 minutes, foetal distress, congenital malformation |
| Llorca J, 2020 Spain     | Prospective cohort   | 477 women<br>8 mothers with confirmed COVID-19 |    | All women admitted for delivery at a hospital and their neonates.<br><br>Universal screening was carried out.<br><br>3 groups<br>1) Women who delivered before 26 <sup>th</sup> May<br>2) Women who delivered from 26 <sup>th</sup> May<br>3) Women at 12 weeks of gestation from 26 <sup>th</sup> May                   | Mothers were diagnosed by nasopharyngeal swabs at delivery (for first two groups) or at 12 weeks of pregnancy (for last group).<br><br>Newborns from SARS-CoV-2 positive mothers were diagnosed by nasopharyngeal swabs on the day of delivery and on the following day. | Pregnancy-related: preterm and term delivery – caesarean section and vaginal, gestational diabetes, pregnancy-induced hypertension, premature rupture of membranes, chorioamnionitis                                                             | Birthweight, Apgar scores at 1 minute and 5 minutes, admission to NICU                                            |
| Massarotti C, 2020 Italy | Prospective cohort   | 333 women<br>7 mothers with confirmed COVID-19 |    | All women admitted for delivery in the maternal wards of four hospitals in Genoa, Italy.<br><br>Universal screening was carried out.                                                                                                                                                                                     | Mothers were diagnosed by nasopharyngeal swabs.                                                                                                                                                                                                                          | Pregnancy-related: preterm and term delivery                                                                                                                                                                                                     |                                                                                                                   |

|                                   |                      |                                                                                                                                                         |    |                                                                                                                                                                                                                                                                                                                                                                                                                                          |                                                                                                                                                                                          |                                             |                                                                                                                                                                                                                                                                                                                                                  |
|-----------------------------------|----------------------|---------------------------------------------------------------------------------------------------------------------------------------------------------|----|------------------------------------------------------------------------------------------------------------------------------------------------------------------------------------------------------------------------------------------------------------------------------------------------------------------------------------------------------------------------------------------------------------------------------------------|------------------------------------------------------------------------------------------------------------------------------------------------------------------------------------------|---------------------------------------------|--------------------------------------------------------------------------------------------------------------------------------------------------------------------------------------------------------------------------------------------------------------------------------------------------------------------------------------------------|
| Molteni E, 2020 UK/Sweden/<br>USA | Prospective cohort   | 4433<br>women<br><br>1918<br>mothers<br>with<br>suspected<br>or<br>confirmed<br>COVID-<br>19<br><br>213<br>mothers<br>with<br>confirmed<br>COVID-<br>19 |    | All women aged between 18<br>and 44 years were recruited<br>from the community via<br>smart phone application and<br>a web-based survey.<br><br>It is unclear how testing was<br>carried out.<br><br>2 groups of women,<br>depending on the method of<br>recruitment. Each was<br>divided into two subgroups.<br><br>1) Non-pregnant women<br>2) Pregnant women<br><br>Women who reported a<br>pending SARS-CoV-2 test<br>were excluded. | Method of<br>diagnosis is<br>unclear.                                                                                                                                                    | Diabetes, COPD,<br>hypertension,<br>smoking | COVID-related:<br>admission to<br>hospital, delirium                                                                                                                                                                                                                                                                                             |
| Shah PT, 2020 India               | Prospective cohort   | 125<br>women<br><br>125<br>mothers<br>with<br>confirmed<br>COVID-<br>19                                                                                 | 99 | All laboratory-confirmed<br>women reported at a<br>hospital.<br><br>It is unclear how testing was<br>carried out.<br><br>Symptomatic women with<br>negative SARS-CoV-2 test<br>were excluded.                                                                                                                                                                                                                                            | Mothers were<br>diagnosed by<br>nasopharyngeal<br>and pharyngeal<br>swabs.<br><br>Newborns were<br>diagnosed by<br>nasopharyngeal<br>and pharyngeal<br>swabs straight<br>after delivery. |                                             | COVID-related: all-<br>cause mortality,<br>pneumonia,<br>admission to ICU,<br>acute hepatic injury<br><br>Pregnancy-related:<br>miscarriage, induced<br>abortion, preterm<br>delivery,<br>spontaneous preterm<br>delivery, mode of<br>delivery – caesarean<br>section and vaginal,<br>gestational diabetes,<br>pregnancy-induced<br>hypertension |
| Syed S, 2020 Pakistan             | Retrospective cohort | 17 women<br><br>17<br>mothers<br>with<br>suspected<br>or<br>confirmed<br>COVID-<br>19                                                                   | 17 | All symptomatic and<br>asymptomatic diagnosed<br>with COVID-19 who<br>delivered at a hospital.<br><br>It is unclear how testing was<br>carried out.<br><br>No exclusion criteria<br>implemented.                                                                                                                                                                                                                                         | Laboratory-<br>confirmed<br>mothers were<br>diagnosed by RT-<br>PCRs.<br><br>Clinically-<br>diagnosed<br>mothers were<br>those with a                                                    |                                             | COVID-related: all-<br>cause mortality,<br>admission to ICU,<br>oxygenation, acute<br>hepatic injury, sepsis<br><br>Pregnancy-related:<br>preterm delivery,<br>mode of delivery –<br>caesarean section and                                                                                                                                       |

|                       |                      |                                                    |                                                                                                                                                  |                                                                                                                                                                                                                                                                                      |                                                                                                                                                                                                                                                                            |                                                                                                                                                                                                              |
|-----------------------|----------------------|----------------------------------------------------|--------------------------------------------------------------------------------------------------------------------------------------------------|--------------------------------------------------------------------------------------------------------------------------------------------------------------------------------------------------------------------------------------------------------------------------------------|----------------------------------------------------------------------------------------------------------------------------------------------------------------------------------------------------------------------------------------------------------------------------|--------------------------------------------------------------------------------------------------------------------------------------------------------------------------------------------------------------|
|                       |                      | 14 mothers with confirmed COVID-19                 |                                                                                                                                                  | clinical suspicion of COVID-19 but a negative RT-PCR result.<br><br>Most newborns were diagnosed by RT-PCRs 24 hours after delivery.                                                                                                                                                 | vaginal, premature rupture of membranes, chorioamnionitis, pregnancy-induced hypertension                                                                                                                                                                                  |                                                                                                                                                                                                              |
| Youssef A, 2020 Italy | Prospective cohort   | 75 women<br><br>3 mothers with confirmed COVID-19  | All asymptomatic women reported at a hospital.<br><br>Universal screening was carried out.                                                       | Mothers were diagnosed by oropharyngeal swabs.                                                                                                                                                                                                                                       |                                                                                                                                                                                                                                                                            |                                                                                                                                                                                                              |
| ROUND 11              |                      |                                                    |                                                                                                                                                  |                                                                                                                                                                                                                                                                                      |                                                                                                                                                                                                                                                                            |                                                                                                                                                                                                              |
| Anand P, 2020 India   | Retrospective cohort | 69 women<br><br>69 mothers with confirmed COVID-19 | 69<br><br>All laboratory-confirmed women who delivered at a hospital and their neonates.<br><br>Testing was carried out on symptomatic patients. | Mothers were diagnosed by RT-PCRs.<br><br>Newborns were diagnosed by nasopharyngeal/oropharyngeal swabs. If mother was diagnosed before delivery, they were tested within 24 hours of birth. If mother was diagnosed after delivery, they were tested soon after mother's diagnosis. | COVID-related: all-cause mortality, admission to ICU, severe pneumonia, acute renal injury, coagulopathy, acidosis<br><br>Pregnancy-related: induced abortion, preterm and term delivery, mode of delivery – caesarean section and vaginal, premature rupture of membranes | Stillbirth, neonatal death, admission to NICU, neonatal sepsis, birthweight – low birthweight defined as less than 2500 grams, gestational age at delivery, Apgar score at 1 minute, congenital malformation |

|                      |                      |                                                      |     |                                                                                                                                                                                                                                                              |                                                                                              |                                                                                                                                                                                                  |                                                                                                                                                                                                                                                                                                                                                                                                    |                                           |
|----------------------|----------------------|------------------------------------------------------|-----|--------------------------------------------------------------------------------------------------------------------------------------------------------------------------------------------------------------------------------------------------------------|----------------------------------------------------------------------------------------------|--------------------------------------------------------------------------------------------------------------------------------------------------------------------------------------------------|----------------------------------------------------------------------------------------------------------------------------------------------------------------------------------------------------------------------------------------------------------------------------------------------------------------------------------------------------------------------------------------------------|-------------------------------------------|
| Cubo AM, 2020 Spain  | Retrospective cohort | 366 women<br><br>25 mothers with confirmed COVID-19  |     | All women admitted for delivery in the obstetrics ward and emergency department at a hospital, as well as those from an outpatient contact tracing program.<br><br>Universal screening was carried out.                                                      | Most mothers were diagnosed by nasopharyngeal swabs.                                         |                                                                                                                                                                                                  | COVID-related: all-cause mortality, pneumonia, admission to ICU, severe pneumonia, coagulopathy, ICU length of stay<br><br>Pregnancy-related: preterm and term delivery, mode of delivery – caesarean section, premature rupture of membranes, preterm-premature rupture of membranes, pregnancy-induced hypertension                                                                              | Stillbirth                                |
| Delahoy MJ, 2020 USA | Prospective cohort   | 598 women<br><br>598 mothers with confirmed COVID-19 | 454 | All hospitalised pregnant women (aged 15-49 years) with laboratory-confirmed COVID-19 reported in 13 US states.<br><br>It is unclear how testing was carried out.<br><br>2 groups<br>1) Women symptomatic at admission<br>2) Women asymptomatic at admission | Mothers were diagnosed by RT-PCRs during hospital stay or within 14 days prior to admission. | Age, ethnicity, trimester, any comorbidity, asthma, COPD, diabetes, chronic hypertension, smoking, multiple pregnancy, gestational diabetes, pregnancy induced hypertension, any symptom, parity | COVID-related: all-cause mortality, pneumonia, acute respiratory distress syndrome, respiratory failure, invasive ventilation, oxygenation, admission to ICU and hospital, acute renal injury, sepsis, ICU length of stay<br><br>Pregnancy-related: miscarriage, preterm and term delivery, mode of delivery - caesarean section and vaginal, gestational diabetes, pregnancy-induced hypertension | Foetal growth restriction, neonatal death |



|                                                                       |                      |                                                                         |     |                                                                                                                                                                                                                                                                       |                                                                                                                                                                                                                        |             |                                                                                                                                                                                                                                                                                                                                                                                                                                    |                                                                                                                                                                                                                            |
|-----------------------------------------------------------------------|----------------------|-------------------------------------------------------------------------|-----|-----------------------------------------------------------------------------------------------------------------------------------------------------------------------------------------------------------------------------------------------------------------------|------------------------------------------------------------------------------------------------------------------------------------------------------------------------------------------------------------------------|-------------|------------------------------------------------------------------------------------------------------------------------------------------------------------------------------------------------------------------------------------------------------------------------------------------------------------------------------------------------------------------------------------------------------------------------------------|----------------------------------------------------------------------------------------------------------------------------------------------------------------------------------------------------------------------------|
| Di Mascio D (1), 2020<br>Europe/USA/ South America/<br>Asia/Australia | Retrospective cohort | 388<br>women<br><br>388<br>mothers<br>with<br>confirmed<br>COVID-<br>19 | 257 | All women with laboratory-<br>confirmed COVID-19<br>diagnosed during pregnancy.<br><br>Testing was carried out on<br>symptomatic patients or due<br>to exposure history.<br><br>Those women who tested<br>positive before conception or<br>post-partum were excluded. | Mothers were<br>diagnosed by<br>nasal and<br>pharyngeal swabs<br>at triage.<br><br>Newborns from<br>COVID-positive<br>mothers were<br>diagnosed by<br>nasal and<br>pharyngeal swabs<br>within 24 hours<br>of delivery. | Any symptom | COVID-related: all-<br>cause mortality,<br>acute respiratory<br>distress syndrome,<br>respiratory failure,<br>invasive ventilation,<br>oxygenation,<br>admission to ICU,<br>acute cardiac and<br>renal injury<br><br>Pregnancy-related:<br>miscarriage, induced<br>abortion, preterm<br>delivery,<br>spontaneous preterm<br>delivery, mode of<br>delivery – caesarean<br>section and vaginal,<br>pregnancy-induced<br>hypertension | Stillbirth,<br>neonatal death,<br>admission to<br>NICU, neonatal<br>sepsis, foetal<br>growth<br>restriction,<br>birthweight,<br>gestational age at<br>delivery                                                             |
| Egerup P, 2020 Denmark                                                | Prospective cohort   | 1313<br>women<br><br>29<br>mothers<br>with<br>confirmed<br>COVID-<br>19 | 29  | All women who gave birth at<br>a hospital along with their<br>newborns and partners.<br><br>Universal screening was<br>carried out.<br><br>2 groups<br>1) Women with positive<br>antibodies for SARS-CoV-2<br>2) Women with negative<br>antibodies for SARS-CoV-2     | Mothers were<br>diagnosed by<br>pharyngeal swabs<br>and serology<br>IgG/IgM testing<br>for SARS-CoV-2<br>at admission.<br><br>Newborns were<br>diagnosed by<br>serology IgG/IgM<br>testing straight<br>after delivery. |             | Pregnancy-related:<br>preterm delivery,<br>induced labour,<br>preterm-premature<br>rupture of<br>membranes, mode of<br>delivery – caesarean<br>section and vaginal,<br>postpartum<br>haemorrhage,<br>gestational diabetes,<br>pregnancy-induced<br>hypertension                                                                                                                                                                    | Stillbirth,<br>gestational age at<br>delivery,<br>birthweight – low<br>birthweight<br>defined as less<br>than 2500 grams,<br>Apgar scores at 1<br>minute and 5<br>minutes,<br>congenital<br>malformation,<br>cord blood pH |
| Franchi M (2), 2020 Italy                                             | Prospective cohort   | 473<br>women<br><br>2 mothers<br>with<br>confirmed<br>COVID-<br>19      |     | All women admitted to the<br>obstetrics and gynaecology<br>department of a hospital.<br><br>Universal screening was<br>carried out.                                                                                                                                   | Mothers were<br>diagnosed by<br>nasopharyngeal<br>swabs on<br>admission.                                                                                                                                               |             | Pregnancy-related:<br>miscarriage, induced<br>abortion                                                                                                                                                                                                                                                                                                                                                                             |                                                                                                                                                                                                                            |

|                            |                      |                                                 |    |                                                                                                                                                                                                                                                                                                                                                         |                                                 |                                          |                                                                                                                                                                           |                                                                        |
|----------------------------|----------------------|-------------------------------------------------|----|---------------------------------------------------------------------------------------------------------------------------------------------------------------------------------------------------------------------------------------------------------------------------------------------------------------------------------------------------------|-------------------------------------------------|------------------------------------------|---------------------------------------------------------------------------------------------------------------------------------------------------------------------------|------------------------------------------------------------------------|
| He M, 2020 USA             | Retrospective cohort | 21 women<br>21 mothers with confirmed COVID-19  | 21 | All women with laboratory-confirmed COVID-19 who delivered at a hospital and had their placentas histologically examined. They were all singleton pregnancies and delivered in the third trimester.<br><br>It is unclear how testing was carried out.<br><br>Women who were not tested, had a multiple pregnancy or foetal abnormalities were excluded. | Mothers were diagnosed by nasopharyngeal swabs. |                                          | COVID-related: pneumonia, respiratory failure<br><br>Pregnancy-related: preterm and term delivery, gestational diabetes, pregnancy-induced hypertension, chorioamnionitis | Neonatal death, foetal growth restriction, gestational age at delivery |
| Hossain I, 2020 Bangladesh | Retrospective cohort | 30 women<br>30 mothers with confirmed COVID-19  |    | All consecutive women with laboratory-confirmed COVID-19 admitted to a hospital.<br><br>It is unclear how testing was carried out.                                                                                                                                                                                                                      | Method of diagnosis is unclear.                 |                                          | COVID-related: all-cause mortality, pneumonia, invasive and non-invasive ventilation, admission to ICU                                                                    |                                                                        |
| Kalafat E (1), 2020 Turkey | Retrospective cohort | 601 women<br>82 mothers with confirmed COVID-19 |    | All asymptomatic women admitted for delivery and symptomatic women evaluated for suspected COVID-19 at two hospitals.<br><br>Universal screening was carried out.<br><br>2 groups<br>1) Women with positive RT-PCR result<br>2) Women with negative RT-PCR result                                                                                       | Mothers were diagnosed by RT-PCRs.              | Age, BMI, smoking, diabetes, any symptom |                                                                                                                                                                           |                                                                        |

|                                  |                      |                                                                                                           |     |                                                                                                                                                                                                                                                                                                         |                                                                                                                                                                                                                                                          |                                                                                                                                                        |                                                                                                                                                                                                                                                                                                                                              |
|----------------------------------|----------------------|-----------------------------------------------------------------------------------------------------------|-----|---------------------------------------------------------------------------------------------------------------------------------------------------------------------------------------------------------------------------------------------------------------------------------------------------------|----------------------------------------------------------------------------------------------------------------------------------------------------------------------------------------------------------------------------------------------------------|--------------------------------------------------------------------------------------------------------------------------------------------------------|----------------------------------------------------------------------------------------------------------------------------------------------------------------------------------------------------------------------------------------------------------------------------------------------------------------------------------------------|
| Kerala multicenter study         | Prospective cohort   | 350 women<br><br>350 mothers with confirmed COVID-19                                                      | 229 | All laboratory-confirmed women admitted to government medical colleges in Kerala.<br><br>Testing was carried out on symptomatic patients.<br><br>Women with suspected COVID-19 who had a negative swab result were excluded.                                                                            | Mothers were diagnosed by pharyngeal swabs.<br><br>Newborns were diagnosed by RT-PCRs.                                                                                                                                                                   | Age, BMI, gestational diabetes, any comorbidity, chronic hypertension, parity, multiple pregnancy, diabetes                                            | COVID-related: admission to ICU, invasive ventilation, severe pneumonia<br><br>Pregnancy-related: preterm delivery, gestational diabetes, mode of delivery – caesarean section and vaginal                                                                                                                                                   |
| Liu W (1), 2020 China            | Retrospective cohort | 48 women<br><br>32 mothers with suspected or confirmed COVID-19<br><br>15 mothers with confirmed COVID-19 | 32  | All women suspected with COVID-19 admitted and delivered newborns at two hospitals.<br><br>Universal screening was carried out.<br><br>3 groups<br>1) Newborns born to laboratory-confirmed mothers<br>2) Newborns born to clinically-diagnosed mothers<br>3) Newborns born to mothers without COVID-19 | Laboratory-confirmed mothers were diagnosed by nasopharyngeal swabs before delivery.<br><br>Clinically-diagnosed mothers were diagnosed by chest CT findings and symptoms, despite negative swab result.<br><br>Newborns were diagnosed by throat swabs. | Age, gestational age, parity, chronic hypertension, gestational diabetes, fever, cough                                                                 | Pregnancy-related: preterm delivery, gestational diabetes, pregnancy-induced hypertension, mode of delivery - caesarean section and vaginal, postpartum haemorrhage, chorioamnionitis<br><br>Admission to NICU, Apgar score at 5 minutes, small-for-gestational-age, birthweight, gestational age at delivery, respiratory distress syndrome |
| Martinez-Perez O (1), 2020 Spain | Prospective cohort   | 1009 women<br><br>246 mothers with confirmed COVID-19                                                     | 252 | All women admitted and gave birth at 76 hospitals.<br><br>Universal screening was carried out.<br><br>2 groups<br>1) Women with positive RT-PCR test result<br>2) Women with negative RT-PCR test result                                                                                                | Mothers were diagnosed by nasopharyngeal and/or oropharyngeal swabs.<br><br>Most newborns born to COVID-positive mothers were diagnosed by nasopharyngeal and/or                                                                                         | Age, ethnicity, parity, smoking, BMI, chronic hypertension, asthma, multiple pregnancy, pregnancy-induced hypertension, gestational diabetes, diabetes | COVID-related: all-cause mortality, pneumonia, admission to ICU, severe pneumonia, septic shock<br><br>Pregnancy-related: preterm delivery, spontaneous preterm delivery, preterm-premature rupture of membranes, premature rupture of                                                                                                       |

|                                   |                      |                                                      |    |                                                                                                                                                                                                                                               |                                                                                                              |                                                                   |                                                                                                                                           |
|-----------------------------------|----------------------|------------------------------------------------------|----|-----------------------------------------------------------------------------------------------------------------------------------------------------------------------------------------------------------------------------------------------|--------------------------------------------------------------------------------------------------------------|-------------------------------------------------------------------|-------------------------------------------------------------------------------------------------------------------------------------------|
|                                   |                      |                                                      |    |                                                                                                                                                                                                                                               | oropharyngeal swabs within first. 48 hours of life.                                                          |                                                                   | membranes, mode of delivery – caesarean section and vaginal, postpartum haemorrhage, pregnancy-induced hypertension, gestational diabetes |
| Martinez-Portilla RJ, 2020 Mexico | Prospective cohort   | 224 women<br><br>224 mothers with confirmed COVID-19 |    | All women with laboratory-confirmed COVID-19 reported in an epidemiological surveillance system.<br><br>It is unclear how testing was carried out.<br><br>2 groups<br>1) Women with COVID-19 who are alive<br>2) Women with COVID-19 who died | Mothers were diagnosed by nasopharyngeal swabs.                                                              | Asthma, any comorbidity                                           | COVID-related: all-cause mortality, severe pneumonia                                                                                      |
| Mattem J, 2020 France             | Prospective cohort   | 249 women<br><br>20 mothers with confirmed COVID-19  | 20 | All women admitted to the delivery room at a hospital.<br><br>Universal screening was carried out.<br><br>2 groups<br>1) Women with IgG positive result<br>2) Women with IgG negative result                                                  | Mothers were diagnosed by serology IgG testing for SARS-CoV-2 and nasopharyngeal swabs on admission.         | Age, parity, BMI, diabetes, chronic hypertension, smoking, asthma | Pregnancy-related: preterm delivery<br><br>Gestational age at delivery, birthweight                                                       |
| Omrani AS, 2020 Qatar             | Retrospective cohort | 26 women<br><br>26 mothers with confirmed COVID-19   | 10 | First consecutive 5000 patients (aged more than 14 years) with laboratory-confirmed COVID-19 and 60-day follow-up status reported in Hamad Medical Corporation database.<br><br>It is unclear how testing was carried out.                    | Mothers were diagnosed by RT-PCRs on respiratory tract specimens.<br><br>Newborns were diagnosed by RT-PCRs. |                                                                   | COVID-related: all-cause mortality, admission to ICU and hospital, severe pneumonia<br><br>Pregnancy-related: miscarriage                 |

|                      |                      |                                                     |    |                                                                                                                                                                                                                                                                                                                                                                                                                                                                                                                                                                            |                                                                                                                                                                                                                                                                                                    |                                                                                               |                                                                                                                                                                                                                                                                            |                                                            |
|----------------------|----------------------|-----------------------------------------------------|----|----------------------------------------------------------------------------------------------------------------------------------------------------------------------------------------------------------------------------------------------------------------------------------------------------------------------------------------------------------------------------------------------------------------------------------------------------------------------------------------------------------------------------------------------------------------------------|----------------------------------------------------------------------------------------------------------------------------------------------------------------------------------------------------------------------------------------------------------------------------------------------------|-----------------------------------------------------------------------------------------------|----------------------------------------------------------------------------------------------------------------------------------------------------------------------------------------------------------------------------------------------------------------------------|------------------------------------------------------------|
| Pineles BL, 2020 USA | Retrospective cohort | 935 women<br><br>77 mothers with confirmed COVID-19 | 77 | All women at 20 weeks of gestation or more who delivered at a hospital.<br><br>Universal screening was carried out.<br><br>2 groups<br>1) Women with positive RT-PCR result<br>2) Women with negative RT-PCR result                                                                                                                                                                                                                                                                                                                                                        | Mothers were diagnosed by nasopharyngeal swabs on admission for delivery.<br><br>Newborns born to COVID-positive mothers were diagnosed by nasopharyngeal swabs at 24 hours and at 48-72 hours of life.                                                                                            | Age, parity, any comorbidity, BMI, chronic hypertension, diabetes, asthma, fever, any symptom | COVID-related: all-cause mortality, invasive ventilation, oxygenation, admission to ICU, severe pneumonia, coagulopathy<br><br>Pregnancy-related: preterm delivery, mode of delivery – caesarean section and vaginal, pregnancy-induced hypertension, gestational diabetes | Neonatal death, stillbirth, admission to NICU, birthweight |
| Pirjani R, 2020 Iran | Prospective cohort   | 199 women<br><br>66 mothers with confirmed COVID-19 |    | All asymptomatic and symptomatic women admitted at a hospital.<br><br>Testing was carried out on symptomatic patients.<br><br>2 groups<br>1) Infected women (symptomatic women with laboratory-confirmed or clinically diagnosed COVID-19)<br>2) Non-infected women (asymptomatic women)<br><br>Symptomatic women with negative RT-PCR and CT scan were excluded.<br><br>Asymptomatic women who had a history of viral symptoms, family members with suspected symptoms, visited crowded areas, recently travelled or visited a hospital in the recent past were excluded. | Laboratory-confirmed mothers who had symptoms were diagnosed by nasopharyngeal swabs.<br><br>Clinically-diagnosed mothers who had symptoms were diagnosed by CT scan findings.<br><br>Newborns born to infected mothers were diagnosed by nasopharyngeal and throat swabs within one hour of life. | Age, BMI, gestational age, any comorbidity                                                    | COVID-related: acute respiratory distress syndrome, invasive ventilation, oxygenation, admission to ICU, acute renal injury, septic shock<br><br>Pregnancy-related: induced abortion                                                                                       |                                                            |

|                                 |                      |                                                                                                           |    |                                                                                                                                                                                                                     |                                                                                                                                                                                              |                                                                                                                                                                  |                                                                                                                                                                                                                                  |                                                                                                   |
|---------------------------------|----------------------|-----------------------------------------------------------------------------------------------------------|----|---------------------------------------------------------------------------------------------------------------------------------------------------------------------------------------------------------------------|----------------------------------------------------------------------------------------------------------------------------------------------------------------------------------------------|------------------------------------------------------------------------------------------------------------------------------------------------------------------|----------------------------------------------------------------------------------------------------------------------------------------------------------------------------------------------------------------------------------|---------------------------------------------------------------------------------------------------|
| Ruggiero M, 2020 Italy          | Prospective cohort   | 315 women<br><br>28 mothers with confirmed COVID-19                                                       | 28 | All consecutive women who delivered at a hospital.<br><br>Universal screening was carried out.<br><br>Women who had a miscarriage or were referred from another hospital due to a COVID-19 diagnosis were excluded. | Mothers were diagnosed by nasopharyngeal swabs and serology IgG testing for SARS-CoV-2.                                                                                                      | Any symptom, fever, cough, breathlessness, age, BMI, ethnicity, smoking, multiple pregnancy, support person positive, gestational diabetes, chronic hypertension | COVID-related: all-cause mortality, pneumonia, admission to ICU, coagulopathy<br><br>Pregnancy-related: preterm delivery, gestational diabetes, mode of delivery – caesarean section and vaginal, pregnancy-induced hypertension | Stillbirth, neonatal death, small-for-gestational-age, large-for-gestational-age                  |
| Van Keulen BJ, 2020 Netherlands | Prospective cohort   | 51 women<br><br>38 mothers with suspected or confirmed COVID-19<br><br>29 mothers with confirmed COVID-19 |    | All lactating women with laboratory-confirmed and suspected COVID-19.<br><br>It is unclear how testing was carried out.<br><br>2 groups<br>1) Women with confirmed COVID-19<br>2) Women with suspected COVID-19     | Laboratory-confirmed mothers were diagnosed by nasopharyngeal swabs.<br><br>Clinically-diagnosed mothers were diagnosed by symptoms and the presence of a confirmed case in their household. | Age, fever, cough, breathlessness                                                                                                                                | COVID-related: oxygenation, admission to hospital<br><br>Pregnancy-related: mode of delivery – caesarean section and vaginal                                                                                                     |                                                                                                   |
| Zaharie G, 2020 Romania         | Retrospective cohort | 229 women<br><br>5 mothers with confirmed COVID-19                                                        | 5  | All women admitted for delivery in the obstetrics clinic of a hospital.<br><br>Universal screening was carried out.                                                                                                 | Mothers were diagnosed by throat swabs.<br><br>Newborns were diagnosed by nasopharyngeal and oropharyngeal swabs on the first day and fifth day of life.                                     |                                                                                                                                                                  | COVID-related: all-cause mortality<br><br>Pregnancy-related: preterm and term delivery, gestational diabetes, mode of delivery – caesarean section and vaginal                                                                   | Apgar scores at 1 minute and 5 minutes, gestational age at delivery, birthweight, neonatal sepsis |

|                         |                      |                                                 |     |                                                                                                     |                                                                                              |                                                                                                     |                                                                                                                                                                                          |                                                                                                                                     |
|-------------------------|----------------------|-------------------------------------------------|-----|-----------------------------------------------------------------------------------------------------|----------------------------------------------------------------------------------------------|-----------------------------------------------------------------------------------------------------|------------------------------------------------------------------------------------------------------------------------------------------------------------------------------------------|-------------------------------------------------------------------------------------------------------------------------------------|
| Zöllkau J, 2020 Germany | Retrospective cohort | 180 women                                       |     | All women admitted to the obstetrics clinic at a hospital.                                          | Mothers were diagnosed by throat swabs and serology IgG testing for SARS-CoV-2 on admission. |                                                                                                     |                                                                                                                                                                                          |                                                                                                                                     |
|                         |                      | 1 mother with confirmed COVID-19                |     | Universal screening was carried out.                                                                |                                                                                              |                                                                                                     |                                                                                                                                                                                          |                                                                                                                                     |
| ROUND 12                |                      |                                                 |     |                                                                                                     |                                                                                              |                                                                                                     |                                                                                                                                                                                          |                                                                                                                                     |
| Ahlberg M, 2020 Sweden  | Retrospective cohort | 2682 women                                      | 155 | All women who presented in labour at a hospital.                                                    | Mothers were diagnosed by nasopharyngeal swabs on presentation.                              | Age, parity, multiple pregnancy, any comorbidity, BMI, smoking, pre-eclampsia, gestational diabetes | Pregnancy-related: preterm delivery, gestational diabetes, mode of delivery – caesarean section and vaginal, postpartum haemorrhage, pregnancy-induced hypertension, induction of labour | Stillbirth, congenital malformation, Apgar score at 5 minutes, small-for-gestational-age, large-for-gestational-age                 |
|                         |                      | 156 mothers with confirmed COVID-19             |     | Universal screening was carried out.                                                                |                                                                                              |                                                                                                     |                                                                                                                                                                                          |                                                                                                                                     |
| Alay I, 2020 Turkey     | Retrospective cohort | 52 women                                        | 14  | All women with laboratory-confirmed and suspected COVID-19 who were admitted at a hospital.         | Laboratory-confirmed mothers were diagnosed by nasal and pharyngeal swabs.                   |                                                                                                     | COVID-related: admission to ICU, ICU length of stay, oxygenation                                                                                                                         | Admission to NICU, Apgar scores at 1 minute and 5 minutes, foetal distress, gestational age at delivery, birthweight, cord blood pH |
|                         |                      | 52 mothers with suspected or confirmed COVID-19 |     | It is unclear how testing was carried out.                                                          | Clinically-diagnosed mothers were diagnosed by symptoms and CT scan findings.                |                                                                                                     | Pregnancy-related: preterm delivery, spontaneous preterm delivery, mode of delivery – caesarean section and vaginal, pregnancy-induced hypertension                                      |                                                                                                                                     |
|                         |                      | 27 mothers with confirmed COVID-19              |     | Women who were asymptomatic, had a negative RT-PCR result or refused hospitalisation were excluded. | Newborns were diagnosed by nasal and oropharyngeal swabs within first 24 hours of life.      |                                                                                                     |                                                                                                                                                                                          |                                                                                                                                     |

|                          |                      |                                                     |     |                                                                                                                                                                                                                                                                                                                                                                                                                                                                                                                                                                                                                                                                                                                            |                                                                                                                                                        |                                                                                                                                                                                                  |                                                                                                                                                                                                                                                                                          |                                                                                                                                                                                                                          |
|--------------------------|----------------------|-----------------------------------------------------|-----|----------------------------------------------------------------------------------------------------------------------------------------------------------------------------------------------------------------------------------------------------------------------------------------------------------------------------------------------------------------------------------------------------------------------------------------------------------------------------------------------------------------------------------------------------------------------------------------------------------------------------------------------------------------------------------------------------------------------------|--------------------------------------------------------------------------------------------------------------------------------------------------------|--------------------------------------------------------------------------------------------------------------------------------------------------------------------------------------------------|------------------------------------------------------------------------------------------------------------------------------------------------------------------------------------------------------------------------------------------------------------------------------------------|--------------------------------------------------------------------------------------------------------------------------------------------------------------------------------------------------------------------------|
| Brandt JS, 2020 USA      | Retrospective cohort | 183 women<br><br>61 mothers with confirmed COVID-19 | 184 | <p>All consecutive women with laboratory-confirmed COVID-19 admitted to a hospital and delivered between 16.0 and 41.6 weeks of gestation.</p> <p>Testing was initially carried out on patients with symptoms, who recently travelled to high-risk countries or had a high-risk exposure. Universal screening was started after 10<sup>th</sup> April.</p> <p>2 groups<br/>1) COVID cases<br/>2) Matched controls (women who delivered without symptoms or had a negative test before universal screening and those who delivered with a negative test from universal screening)</p> <p>Women who were suspected but were not tested, had a negative test result or who were discharged before delivery were excluded.</p> | <p>Mothers were diagnosed by nasopharyngeal swabs on admission.</p> <p>Newborns born to COVID-positive mothers were diagnosed at 36 hours of life.</p> | <p>Age, BMI, ethnicity, any comorbidity, diabetes, chronic hypertension, asthma, multiple pregnancy, fever, cough, breathlessness, lymphopenia, abnormal LFT, pre-eclampsia, gestational age</p> | <p>COVID-related: pneumonia, invasive ventilation, oxygenation, coagulopathy, admission to ICU, severe pneumonia, secondary infection</p> <p>Pregnancy-related: preterm delivery, mode of delivery – caesarean section and vaginal, chorioamnionitis, pregnancy-induced hypertension</p> | <p>Stillbirth, neonatal death, admission to NICU, gestational age at delivery, birthweight, Apgar scores at 1 minute and 5 minutes, length of stay in NICU, respiratory distress syndrome, necrotising enterocolitis</p> |
| Cavaliere AF, 2020 Italy | Retrospective cohort | 226 women<br><br>6 mothers with confirmed COVID-19  |     | <p>All women admitted for delivery at a hospital.</p> <p>Universal screening was carried out.</p>                                                                                                                                                                                                                                                                                                                                                                                                                                                                                                                                                                                                                          | <p>Mothers were diagnosed by nasopharyngeal swabs. Most also had a serology IgG/IgM testing for SARS-CoV-2.</p>                                        |                                                                                                                                                                                                  |                                                                                                                                                                                                                                                                                          |                                                                                                                                                                                                                          |



|                                    |                      |                                                        |     |                                                                                                                                                                                                                                                                                          |                                                                                                                                              |                                         |                                                                                                                                                                |                                                                                                                                    |
|------------------------------------|----------------------|--------------------------------------------------------|-----|------------------------------------------------------------------------------------------------------------------------------------------------------------------------------------------------------------------------------------------------------------------------------------------|----------------------------------------------------------------------------------------------------------------------------------------------|-----------------------------------------|----------------------------------------------------------------------------------------------------------------------------------------------------------------|------------------------------------------------------------------------------------------------------------------------------------|
| Ceulemans M (2), 2020<br>Belgium   | Prospective cohort   | 71 women<br><br>9 mothers with confirmed COVID-19      |     | All pregnant and breastfeeding women and women who breastfed recently (aged above 18 years) reported in an online survey.<br><br>It is unclear how testing was carried out.                                                                                                              | Method of diagnosis is unclear.                                                                                                              |                                         | COVID-related: admission to hospital                                                                                                                           |                                                                                                                                    |
| Coronado-Arroyo JC, 2020<br>Peru   | Retrospective cohort | 20 women<br><br>20 mothers with confirmed COVID-19     | 20  | All women with laboratory-confirmed COVID-19 admitted at the obstetrics department of a hospital who developed pre-eclampsia.<br><br>It is unclear how testing was carried out.                                                                                                          | Mothers were diagnosed by serology for SARS-CoV-2.<br><br>Newborns were diagnosed by nasopharyngeal swabs within the first 24 hours of life. | Age, parity, any symptom                | Pregnancy-related: preterm and term delivery – caesarean section and vaginal                                                                                   | Stillbirth, small-for-gestational-age                                                                                              |
| Encinas Pardilla MB, 2020<br>Spain | Prospective cohort   | 16308 women<br><br>338 mothers with confirmed COVID-19 |     | All asymptomatic pregnant women reported in a registry who delivered or were admitted for any reason at the hospital.<br><br>Universal screening was carried out.                                                                                                                        | Mothers were diagnosed by RT-PCRs and/or serology IgG/IgM testing for SARS-CoV-2.                                                            |                                         |                                                                                                                                                                |                                                                                                                                    |
| Flaherman VJ, 2020 USA             | Prospective cohort   | 263 women<br><br>179 mothers with confirmed COVID-19   | 179 | All laboratory-confirmed and suspected women (aged 13 years or above) during pregnancy or within the first six weeks after pregnancy who delivered a live birth.<br><br>It is unclear how testing was carried out.<br><br>2 groups<br>1) COVID-positive women<br>2) COVID-negative women | Method of diagnosis is unclear.                                                                                                              | Age, ethnicity, gestational age, parity | COVID-related: all-cause mortality, admission to ICU and hospital<br><br>Pregnancy-related: preterm delivery, mode of delivery – caesarean section and vaginal | Admission to NICU, congenital malformation, Apgar score at 5 minutes, gestational age at delivery, birthweight, neonatal infection |

|                             |                      |                                                          |                                                                                                                                                                                                                                                                                                                                                                               |                                                                                                               |                                                                                                    |
|-----------------------------|----------------------|----------------------------------------------------------|-------------------------------------------------------------------------------------------------------------------------------------------------------------------------------------------------------------------------------------------------------------------------------------------------------------------------------------------------------------------------------|---------------------------------------------------------------------------------------------------------------|----------------------------------------------------------------------------------------------------|
|                             |                      |                                                          | Mothers with suspected COVID-19 who were not tested were excluded.                                                                                                                                                                                                                                                                                                            |                                                                                                               |                                                                                                    |
| Haizler-Cohen L, 2020 USA   | Retrospective cohort | 1671 women<br><br>284 mothers with confirmed COVID-19    | All women admitted to the labour and delivery unit at seven hospitals who were tested for SARS-CoV-2 IgG antibodies.<br><br>Universal screening was carried out.                                                                                                                                                                                                              | Mothers were diagnosed by serology IgG testing for SARS-CoV-2. Most were also tested by nasopharyngeal swabs. |                                                                                                    |
| Kelly JC (1), 2020 USA      | Retrospective cohort | 532 women<br><br>25 mothers with confirmed COVID-19      | All women admitted for delivery at a hospital.<br><br>Universal screening was carried out on patients before the delivery procedure.                                                                                                                                                                                                                                          | Method of diagnosis is unclear.                                                                               |                                                                                                    |
| Leon-Abarca JA, 2020 Mexico | Retrospective cohort | 138835 women<br><br>3434 mothers with confirmed COVID-19 | All women of reproductive age (between 15-49 years) suspected of COVID-19 due to symptoms over the past seven days. Included patients were without any known risk factor except for pregnancy and had a RT-PCR test result.<br><br>Testing was carried out on symptomatic patients.<br><br>2 groups<br>1) Pregnant women with COVID-19<br>2) Non-pregnant women with COVID-19 | Mothers were diagnosed by RT-PCRs.                                                                            | COVID-related: all-cause mortality, pneumonia, invasive ventilation, admission to ICU and hospital |

|                                     |                      |                                                                                                           |     |                                                                                                                                                                                                                                                                                                                                                                                                                                                  |                                                                                                                                                                                                                                                                              |                      |                                                                                                                                                                                       |                                                                                                                                                                                                                                                                           |
|-------------------------------------|----------------------|-----------------------------------------------------------------------------------------------------------|-----|--------------------------------------------------------------------------------------------------------------------------------------------------------------------------------------------------------------------------------------------------------------------------------------------------------------------------------------------------------------------------------------------------------------------------------------------------|------------------------------------------------------------------------------------------------------------------------------------------------------------------------------------------------------------------------------------------------------------------------------|----------------------|---------------------------------------------------------------------------------------------------------------------------------------------------------------------------------------|---------------------------------------------------------------------------------------------------------------------------------------------------------------------------------------------------------------------------------------------------------------------------|
| Marín Gabriel MA (2), 2020<br>Spain | Retrospective cohort | 242 women<br><br>242 mothers with confirmed COVID-19                                                      | 248 | All laboratory-confirmed women diagnosed when they were in the third trimester of pregnancy and delivered their newborns at 16 hospitals.<br><br>It is unclear how testing was carried out.<br><br>Women who did not have a positive test result were excluded.                                                                                                                                                                                  | Followed diagnostic criteria according to the Spanish government.<br><br>Mothers were diagnosed either by nasopharyngeal and/or oropharyngeal swabs or serology IgG/IgM testing for SARS-CoV-2.<br><br>Newborns were diagnosed by nasopharyngeal and/or oropharyngeal swabs. |                      | COVID-related: all-cause mortality, admission to ICU and hospital, coagulopathy<br><br>Pregnancy-related: preterm and term delivery, mode of delivery – caesarean section and vaginal | Neonatal death, admission to NICU, gestational age at delivery, birthweight, Apgar scores at 1 minute and 5 minutes, length of stay in NICU, hypoxic ischaemic encephalopathy, neonatal pneumonia, neonatal infection, congenital malformation, necrotising enterocolitis |
| Norooznejhad AH (1), 2020<br>Iran   | Retrospective cohort | 58 women<br><br>20 mothers with suspected or confirmed COVID-19<br><br>15 mothers with confirmed COVID-19 |     | All laboratory-confirmed and suspected women admitted at five hospitals who delivered by caesarean section.<br><br>It is unclear how testing was carried out.<br><br>2 groups<br>1) Women diagnosed with COVID-19<br>2) Control (healthy women who had uncomplicated caesarean sections)<br><br>Women with underlying diseases, who had pregnancy/surgical/COVID-19 related issues or underwent an intrapartum caesarean delivery were excluded. | Laboratory-confirmed mothers were diagnosed by RT-PCRs.<br><br>Clinically-diagnosed mothers were diagnosed by symptoms and chest CT scan findings.                                                                                                                           | Age, gestational age |                                                                                                                                                                                       | Gestational age at delivery                                                                                                                                                                                                                                               |

|                                      |                      |                                                                                                              |    |                                                                                                                                                                                                                                                                                                                                            |                                                                                                                                                        |                                                                                                                                                                                          |                                                                                                                                                                                                                                                                                                                       |                                                                                                                               |
|--------------------------------------|----------------------|--------------------------------------------------------------------------------------------------------------|----|--------------------------------------------------------------------------------------------------------------------------------------------------------------------------------------------------------------------------------------------------------------------------------------------------------------------------------------------|--------------------------------------------------------------------------------------------------------------------------------------------------------|------------------------------------------------------------------------------------------------------------------------------------------------------------------------------------------|-----------------------------------------------------------------------------------------------------------------------------------------------------------------------------------------------------------------------------------------------------------------------------------------------------------------------|-------------------------------------------------------------------------------------------------------------------------------|
| Panagiotakopoulos L, 2020<br>USA     | Retrospective cohort | 105 women<br><br>105 mothers with suspected or confirmed COVID-19<br><br>104 mothers with confirmed COVID-19 | 93 | All pregnant women diagnosed with COVID-19 who were admitted at eight healthcare centres.<br><br>It is unclear how testing was carried out.<br><br>3 groups (based on reason for admission)<br>1) COVID-19 treatment without an obstetrics reason<br>2) Symptomatic with an obstetrics reason<br>3) Asymptomatic with an obstetrics reason | Laboratory-confirmed mothers were diagnosed by RT-PCRs.<br><br>Clinically-diagnosed mother was diagnosed by symptoms and exposure to a confirmed case. | Age, ethnicity, trimester, BMI, gestational diabetes, any comorbidity, asthma, COPD, chronic hypertension, parity, pregnancy-induced hypertension, multiple pregnancy, diabetes, smoking | COVID-related: all-cause mortality, acute respiratory distress syndrome, admission to ICU, oxygenation, acute renal injury, sepsis, invasive ventilation<br><br>Pregnancy-related: preterm delivery, gestational diabetes, pregnancy-induced hypertension, mode of delivery – caesarean section and vaginal           | Admission to NICU, gestational age at delivery, stillbirth                                                                    |
| Remaeus K, 2020 Sweden               | Retrospective cohort | 67 women<br><br>67 mothers with confirmed COVID-19                                                           | 68 | All laboratory-confirmed women who gave birth at delivery units in the Stockholm region.<br><br>Universal screening was carried out.                                                                                                                                                                                                       | Mothers were diagnosed by nasopharyngeal swabs.<br><br>Newborns were diagnosed by RT-PCRs.                                                             |                                                                                                                                                                                          | COVID-related: all-cause mortality, invasive ventilation, admission to ICU, severe pneumonia<br><br>Pregnancy-related: preterm delivery, spontaneous preterm delivery, preterm-premature rupture of membranes, mode of delivery – caesarean section and vaginal, gestational diabetes, pregnancy-induced hypertension | Stillbirth, neonatal death, admission to NICU, Apgar score at 5 minutes, small-for-gestational-age, foetal growth restriction |
| ROI COVID-19 Update, 2020<br>Ireland | Retrospective cohort | 495 women<br><br>70 mothers with confirmed COVID-19                                                          |    | All pregnant women with COVID-19 reported from 16 maternity units/hospitals.<br><br>Universal screening was carried out.                                                                                                                                                                                                                   | Method of diagnosis is unclear.                                                                                                                        |                                                                                                                                                                                          |                                                                                                                                                                                                                                                                                                                       |                                                                                                                               |

|                        |                      |                                                       |     |                                                                                                                                                                                                                                                                  |                                                                                                                                                                   |                                                                                                                                                  |                                                                     |
|------------------------|----------------------|-------------------------------------------------------|-----|------------------------------------------------------------------------------------------------------------------------------------------------------------------------------------------------------------------------------------------------------------------|-------------------------------------------------------------------------------------------------------------------------------------------------------------------|--------------------------------------------------------------------------------------------------------------------------------------------------|---------------------------------------------------------------------|
| Veerus P, 2020 Estonia | Retrospective cohort | 433 women<br><br>2 mothers with confirmed COVID-19    |     | All pregnant women who underwent a pre-natal screening test in the country. Residual blood samples were used for serology testing of SARS-CoV-2.<br><br>Universal screening was carried out.                                                                     | Mothers were diagnosed by serology IgG testing for SARS-CoV-2.                                                                                                    |                                                                                                                                                  |                                                                     |
| Viiuela MC, 2020 Spain | Retrospective cohort | 100 women<br><br>15 mothers with confirmed COVID-19   | 101 | First 100 consecutive women admitted for spontaneous delivery at the obstetrics and gynaecology department of a hospital.<br><br>Universal screening was carried out.<br><br>Women admitted for induction of labour or elective caesarean section were excluded. | Mothers were diagnosed by nasopharyngeal swabs and serology IgG testing for SARS-CoV-2.<br><br>Newborns born to COVID-positive mothers were diagnosed by RT-PCRs. | COVID-related: all-cause mortality, admission to ICU<br><br>Pregnancy-related: mode of delivery – caesarean section and vaginal                  | Neonatal death, admission to NICU                                   |
| Waghmare R, 2020 India | Retrospective cohort | 1140 women<br><br>141 mothers with confirmed COVID-19 |     | All women presenting in labour or likely to deliver in the next five days at 15 hospitals.<br><br>Universal screening was carried out.                                                                                                                           | Method of diagnosis is unclear.                                                                                                                                   |                                                                                                                                                  |                                                                     |
| ROUND 13 PART 1        |                      |                                                       |     |                                                                                                                                                                                                                                                                  |                                                                                                                                                                   |                                                                                                                                                  |                                                                     |
| Afshar Y, 2020 USA     | Prospective cohort   | 736 women<br><br>594 mothers with confirmed COVID-19  |     | All symptomatic women (aged 13 years or above) who were pregnant or had been pregnant within the past six weeks.<br><br>Testing was carried out on symptomatic patients.<br><br>2 groups<br>1) SARS-CoV-2 positive                                               | Mothers were diagnosed by RT-PCRs.                                                                                                                                | Age, parity, trimester, BMI, multiple pregnancy, chronic hypertension, diabetes, asthma, smoking, support person positive, fever, breathlessness | COVID-related: admission to ICU and hospital, depression, psychosis |

|                           |                    |                                                     |                                                                                                                                                                                                                                                                                                                                                                                                                                                                                                                                     |                                                  |
|---------------------------|--------------------|-----------------------------------------------------|-------------------------------------------------------------------------------------------------------------------------------------------------------------------------------------------------------------------------------------------------------------------------------------------------------------------------------------------------------------------------------------------------------------------------------------------------------------------------------------------------------------------------------------|--------------------------------------------------|
|                           |                    |                                                     | 2) SARS-CoV-2 negative                                                                                                                                                                                                                                                                                                                                                                                                                                                                                                              |                                                  |
|                           |                    |                                                     | Women who did not have a baseline questionnaire, had an unknown test result or were asymptomatic during testing were excluded.                                                                                                                                                                                                                                                                                                                                                                                                      |                                                  |
| Ahmed I (2), 2020 UK      | Prospective cohort | 355 women<br><br>86 mothers with confirmed COVID-19 | All women admitted to the maternity unit of two hospitals.<br><br>Universal screening was carried out.                                                                                                                                                                                                                                                                                                                                                                                                                              | Mothers were diagnosed by nose and throat swabs. |
| Bahat PY (1), 2020 Turkey | Prospective cohort | 44 women<br><br>44 mothers with confirmed COVID-19  | All laboratory-confirmed women at more than eight weeks of gestation admitted at a hospital. They did not receive antibacterial or antiviral treatment for the past three months. No vitamin D, vitamin B12 and zinc supplements were taken during pregnancy.<br><br>It is unclear how testing was carried out.<br><br>Women with renal disease, rheumatic disease, diabetes mellitus type 1, AIDS, or those on immunosuppressants were excluded.<br><br>Women with complicated pregnancies (e.g. ectopic pregnancy) were excluded. | Mothers were diagnosed by RT-PCRs.               |

|                              |                      |                                                      |     |                                                                                                                                                                                                                                                                                                                                                                              |                                                                                                                                                                                                                   |                                                                                       |                                                                                                                                                                                                        |                                                                                                                                                                                                                |
|------------------------------|----------------------|------------------------------------------------------|-----|------------------------------------------------------------------------------------------------------------------------------------------------------------------------------------------------------------------------------------------------------------------------------------------------------------------------------------------------------------------------------|-------------------------------------------------------------------------------------------------------------------------------------------------------------------------------------------------------------------|---------------------------------------------------------------------------------------|--------------------------------------------------------------------------------------------------------------------------------------------------------------------------------------------------------|----------------------------------------------------------------------------------------------------------------------------------------------------------------------------------------------------------------|
| Cojocaru L, 2020 USA         | Prospective cohort   | 1989 women<br><br>86 mothers with confirmed COVID-19 | 31  | All laboratory-confirmed women who delivered at a healthcare system.<br><br>It is unclear how testing was carried out.                                                                                                                                                                                                                                                       | Mothers were diagnosed by RT-PCRs.<br><br>Newborns born to COVID-positive mothers were diagnosed by nasopharyngeal and oropharyngeal swabs at 24 hours and also at 48 hours of life if they remained in hospital. |                                                                                       | COVID-related: admission to ICU, invasive ventilation<br><br>Pregnancy-related: mode of delivery - caesarean section and vaginal                                                                       | Gestational age at delivery, birthweight, Apgar scores at 1 minute and 5 minutes, admission to NICU                                                                                                            |
| Diaz-Corvillon P, 2020 Chile | Retrospective cohort | 583 women<br><br>37 mothers with confirmed COVID-19  | 37  | All women admitted for labour and delivery at the obstetrics and gynaecology department of a private healthcare centre.<br><br>Universal screening was carried out.<br><br>2 groups<br>1) Confirmed COVID-19<br>2) Controls<br><br>Women with history of laboratory-confirmed COVID-19 during pregnancy or who were less than 24 weeks of gestation admission were excluded. | Mothers were diagnosed by nasopharyngeal swabs on admission.<br><br>Newborns born to COVID-positive mothers were diagnosed by RT-PCRs at 6 hours and 48-72 hours after delivery.                                  | Age, multiple pregnancy, parity, BMI, chronic hypertension, asthma, diabetes, smoking | COVID-related: all-cause mortality, invasive ventilation, admission to ICU, oxygenation, severe pneumonia<br><br>Pregnancy-related: preterm delivery, mode of delivery – caesarean section and vaginal | Neonatal death, admission to NICU, Apgar scores at 1 minute and 5 minutes, foetal growth restriction, gestational age at delivery, birthweight, small-for-gestational-age, neonatal sepsis, neonatal infection |
| Malhotra Y (1), 2020 USA     | Retrospective cohort | 478 women<br><br>131 mothers with confirmed COVID-19 | 131 | All women admitted for delivery at a healthcare system.<br><br>Universal screening was carried out.                                                                                                                                                                                                                                                                          | Method of diagnosis is unclear.                                                                                                                                                                                   |                                                                                       | Pregnancy-related: preterm and term delivery, mode of delivery – caesarean section and vaginal                                                                                                         | Neonatal death                                                                                                                                                                                                 |

|                                    |                      |                                                                                                                 |    |                                                                                                                                                                                                                                                                                                                   |                                                                                                                                                                                                          |                                                        |                                                                                                                                                                                                                                                                                       |                                                                                         |
|------------------------------------|----------------------|-----------------------------------------------------------------------------------------------------------------|----|-------------------------------------------------------------------------------------------------------------------------------------------------------------------------------------------------------------------------------------------------------------------------------------------------------------------|----------------------------------------------------------------------------------------------------------------------------------------------------------------------------------------------------------|--------------------------------------------------------|---------------------------------------------------------------------------------------------------------------------------------------------------------------------------------------------------------------------------------------------------------------------------------------|-----------------------------------------------------------------------------------------|
| Menezes MO, 2020 Brazil            | Retrospective cohort | 2475 women<br><br>2475 mothers with suspected or confirmed COVID-19<br><br>1775 mothers with confirmed COVID-19 |    | All pregnant and postpartum women aged between 10-50 years with a diagnosis of COVID-19 reported in the Brazilian Acute Respiratory Distress Syndrome Surveillance System.<br><br>It is unclear how testing was carried out.<br><br>2 groups<br>1) Women with adverse outcome<br>2) Women with no adverse outcome | Followed diagnostic criteria according to the Brazilian Ministry of Health.<br><br>Laboratory-confirmed mothers were diagnosed by nasopharyngeal swabs.<br><br>Other methods of diagnosis are not clear. | Age, ethnicity, asthma, diabetes, BMI, any comorbidity | COVID-related: all-cause mortality, invasive and non-invasive ventilation, admission to ICU and hospital                                                                                                                                                                              |                                                                                         |
| Vigil-De Gracia P (2), 2020 Panama | Prospective cohort   | 15 women<br><br>15 mothers with confirmed COVID-19                                                              | 16 | All laboratory-confirmed symptomatic women who later recovered by negative clinical findings or RT-PCR. They were at least 35 days after symptom onset and delivered at one of four hospitals.<br><br>It is unclear how testing was carried out.                                                                  | Mothers were diagnosed by RT-PCRs.                                                                                                                                                                       | Any symptom, age, trimester, BMI, pre-eclampsia        | COVID-related: invasive ventilation, admission to ICU, severe pneumonia<br><br>Pregnancy-related: preterm and term delivery, premature rupture of membranes, preterm-premature rupture of membranes, mode of delivery – caesarean section and vaginal, pregnancy-induced hypertension | Stillbirth, neonatal death, admission to NICU, gestational age at delivery, birthweight |
| Wang M, 2020 USA                   | Retrospective cohort | 813 women<br><br>53 mothers with confirmed COVID-19                                                             | 53 | All women who delivered live newborns at a hospital.<br><br>Testing was initially carried out on patients with clinical suspicion. Universal screening started from 5 <sup>th</sup> May.<br><br>2 groups<br>1) COVID-positive deliveries                                                                          | Mothers were diagnosed by nasopharyngeal swabs on admission.                                                                                                                                             | Age, BMI, pre-eclampsia                                | COVID-related: severe pneumonia, admission to ICU<br><br>Pregnancy-related: preterm delivery, mode of delivery – caesarean section and vaginal, postpartum haemorrhage, induction of labour, pregnancy-induced                                                                        |                                                                                         |



|                        |                      |                                                        |      |                                                                                                                                                                                                                                                                                                                                                                                       |                                                                                                                                                                                                       |                                                                                                                                                                                               |                                                                                                                                                                                        |                                                                                                   |
|------------------------|----------------------|--------------------------------------------------------|------|---------------------------------------------------------------------------------------------------------------------------------------------------------------------------------------------------------------------------------------------------------------------------------------------------------------------------------------------------------------------------------------|-------------------------------------------------------------------------------------------------------------------------------------------------------------------------------------------------------|-----------------------------------------------------------------------------------------------------------------------------------------------------------------------------------------------|----------------------------------------------------------------------------------------------------------------------------------------------------------------------------------------|---------------------------------------------------------------------------------------------------|
|                        |                      |                                                        |      | 2) COVID-negative deliveries                                                                                                                                                                                                                                                                                                                                                          |                                                                                                                                                                                                       |                                                                                                                                                                                               | hypertension, chorioamnionitis                                                                                                                                                         |                                                                                                   |
| Woodworth KR, 2020 USA | Prospective cohort   | 4442 women<br><br>4442 mothers with confirmed COVID-19 | 4515 | All laboratory-confirmed women and their newborns reported in the Surveillance for Emerging Threats to Mothers and Babies Network. Their pregnancy outcomes were known.<br><br>It is unclear how testing was carried out.<br><br>3 groups<br>1) Women with symptomatic infection<br>2) Women with asymptomatic infection<br>3) Women with unknown symptom status                      | Mothers and newborns were diagnosed by RT-PCRs.                                                                                                                                                       | Age, ethnicity, any comorbidity, chronic hypertension, COPD, diabetes, BMI, pregnancy-induced hypertension, gestational diabetes, trimester, any symptom, parity, multiple pregnancy, smoking | Pregnancy-related: miscarriage, preterm and term delivery, mode of delivery – caesarean section and vaginal, pregnancy-induced hypertension, gestational diabetes, induction of labour | Stillbirth, neonatal death, admission to NICU, congenital malformation, small-for-gestational-age |
| Yang H (3), 2020 China | Retrospective cohort | 49 women<br><br>19 mothers with confirmed COVID-19     |      | All Chinese pregnant women living in Wuhan who were admitted to a hospital and diagnosed with COVID-19.<br><br>It is unclear how testing was carried out.<br><br>2 groups<br>1) Women diagnosed with COVID-19<br>2) Controls (pregnant women aged 25-35 years with COVID-19 at the hospital)<br><br>Women who were of non-Chinese nationality or who were non-pregnant were excluded. | Followed diagnostic criteria according to National Health Commission of China.<br><br>Laboratory-confirmed mothers were diagnosed by nasopharyngeal swabs or serology IgG/IgM testing for SARS-CoV-2. | Age, BMI, fever                                                                                                                                                                               | COVID-related: oxygenation, invasive and non-invasive ventilation<br><br>Pregnancy-related: mode of delivery – caesarean section and vaginal                                           |                                                                                                   |

---

|                       |                    |                                                           |  |                                                                                                                                                                                                                                                                                                                 |                                    |                                                                                                                                                     |                                                                                                      |
|-----------------------|--------------------|-----------------------------------------------------------|--|-----------------------------------------------------------------------------------------------------------------------------------------------------------------------------------------------------------------------------------------------------------------------------------------------------------------|------------------------------------|-----------------------------------------------------------------------------------------------------------------------------------------------------|------------------------------------------------------------------------------------------------------|
| Zambrano LD, 2020 USA | Prospective cohort | 461825 women<br><br>30415 mothers with confirmed COVID-19 |  | All symptomatic women of reproductive age (between 15-44 years) with laboratory-confirmed COVID-19 reported through national case surveillance.<br><br>It is unclear how testing was carried out.<br><br>2 groups<br>1) Pregnant women with confirmed COVID-19<br>2) Non-pregnant women with confirmed COVID-19 | Mothers were diagnosed by RT-PCRs. | Age, ethnicity, cough, fever, breathlessness, diabetes, COPD, BMI, any comorbidity, chronic hypertension, any symptom, myalgia, pregnant, diarrhoea | COVID-related: all-cause mortality, invasive ventilation, oxygenation, admission to ICU and hospital |
|-----------------------|--------------------|-----------------------------------------------------------|--|-----------------------------------------------------------------------------------------------------------------------------------------------------------------------------------------------------------------------------------------------------------------------------------------------------------------|------------------------------------|-----------------------------------------------------------------------------------------------------------------------------------------------------|------------------------------------------------------------------------------------------------------|

---

ROUND 13 PART 2

|                                                |                    |                                                    |    |                                                                                                                                                                                                                                                            |                                    |                                                                                                                                                                                                                    |                |
|------------------------------------------------|--------------------|----------------------------------------------------|----|------------------------------------------------------------------------------------------------------------------------------------------------------------------------------------------------------------------------------------------------------------|------------------------------------|--------------------------------------------------------------------------------------------------------------------------------------------------------------------------------------------------------------------|----------------|
| Burwick R, 2020 USA/Italy/Spain/Switzerland/UK | Prospective cohort | 86 women<br><br>86 mothers with confirmed COVID-19 | 45 | All women with severe COVID-19 who were hospitalised and treated with remdesivir. Severe disease defined as laboratory-confirmed for SARS-CoV-2 and either oxygen saturation less than 94% or less while breathing ambient air or need for oxygen support. | Mothers were diagnosed by RT-PCRs. | COVID-related: all-cause mortality, pneumonia, acute respiratory distress syndrome, invasive and non-invasive ventilation, oxygenation, admission to ICU, acute cardiac injury, coagulopathy, secondary infection, | Neonatal death |
|------------------------------------------------|--------------------|----------------------------------------------------|----|------------------------------------------------------------------------------------------------------------------------------------------------------------------------------------------------------------------------------------------------------------|------------------------------------|--------------------------------------------------------------------------------------------------------------------------------------------------------------------------------------------------------------------|----------------|

---

|                          |                      |                                                                                                             |     |                                                                                                                                                                                                                                                                                                                                                                                    |                                                                                                                                                                                                                                                       |                                                                                                                                              |                                                                                                                                                                                                                                     |                                                                                                                                                                                                                                             |
|--------------------------|----------------------|-------------------------------------------------------------------------------------------------------------|-----|------------------------------------------------------------------------------------------------------------------------------------------------------------------------------------------------------------------------------------------------------------------------------------------------------------------------------------------------------------------------------------|-------------------------------------------------------------------------------------------------------------------------------------------------------------------------------------------------------------------------------------------------------|----------------------------------------------------------------------------------------------------------------------------------------------|-------------------------------------------------------------------------------------------------------------------------------------------------------------------------------------------------------------------------------------|---------------------------------------------------------------------------------------------------------------------------------------------------------------------------------------------------------------------------------------------|
|                          |                      |                                                                                                             |     | It is unclear how testing was carried out.                                                                                                                                                                                                                                                                                                                                         |                                                                                                                                                                                                                                                       |                                                                                                                                              | cytokine storm syndrome, delirium                                                                                                                                                                                                   |                                                                                                                                                                                                                                             |
|                          |                      |                                                                                                             |     | 2 groups<br>1) Pregnant cases<br>2) Postpartum cases                                                                                                                                                                                                                                                                                                                               |                                                                                                                                                                                                                                                       |                                                                                                                                              | Pregnancy-related: preterm delivery, spontaneous preterm delivery, mode of delivery – caesarean section and vaginal, gestational diabetes, pregnancy-induced hypertension, miscarriage                                              |                                                                                                                                                                                                                                             |
|                          |                      |                                                                                                             |     | Women with creatinine clearance of less than 30ml per minute, serum level of ALT more than 5 times the upper limit of normal or evidence of multi-organ failure were excluded.                                                                                                                                                                                                     |                                                                                                                                                                                                                                                       |                                                                                                                                              |                                                                                                                                                                                                                                     |                                                                                                                                                                                                                                             |
| Calderon JM, 2020 Mexico | Prospective cohort   | 20 women<br><br>20 mothers with confirmed COVID-19                                                          | 13  | All laboratory-confirmed women seen at one hospital and treated with nitazoxanide.<br><br>It is unclear how testing was carried out.                                                                                                                                                                                                                                               | Mothers were diagnosed by RT-PCRs from respiratory tract.                                                                                                                                                                                             |                                                                                                                                              | COVID-related: all-cause mortality, oxygenation<br><br>Pregnancy-related: preterm delivery, postpartum haemorrhage, pregnancy-induced hypertension, mode of delivery – caesarean section and vaginal, induced abortion, miscarriage | Neonatal death                                                                                                                                                                                                                              |
| Dumitriu D, 2020 USA     | Retrospective cohort | 100 women<br><br>100 mothers with suspected or confirmed COVID-19<br><br>99 mothers with confirmed COVID-19 | 101 | All laboratory-confirmed and suspected women who delivered in one medical centre and their newborns.<br><br>Testing was initially carried out on patients with symptoms on admission and those with unexplained peripartum respiratory signs. Universal screening was started on 22 <sup>nd</sup> March.<br><br>2 groups<br>1) Mild/asymptomatic cases<br>2) Severe/critical cases | Laboratory-confirmed mothers were diagnosed by nasopharyngeal swabs on admission to the labour and delivery unit, at the preadmission testing clinic or on presentation of symptoms.<br><br>Clinically-diagnosed mother was diagnosed by symptoms and | Age, ethnicity, symptoms, asthma, diabetes, chronic hypertension, gestational diabetes, pregnancy-induced hypertension, BMI, gestational age | COVID-related: severe pneumonia<br><br>Pregnancy-related: preterm delivery, preterm-premature rupture of membranes, gestational diabetes, pregnancy-induced hypertension, chorioamnionitis, mode of delivery – caesarean section    | Admission to NICU, neonatal sepsis, Apgar scores at 1 minute and 5 minutes, gestational age at delivery, foetal growth restriction, birthweight, small-for-gestational-age, large-for-gestational-age, congenital malformation, respiratory |

|                           |                      |                                                      |    |                                                                                                                                                                                                                                                                        |                                                                                                                                                                                                |                  |                                                                                                                                                                                                                                                                                                                                                                                           |                                                                    |
|---------------------------|----------------------|------------------------------------------------------|----|------------------------------------------------------------------------------------------------------------------------------------------------------------------------------------------------------------------------------------------------------------------------|------------------------------------------------------------------------------------------------------------------------------------------------------------------------------------------------|------------------|-------------------------------------------------------------------------------------------------------------------------------------------------------------------------------------------------------------------------------------------------------------------------------------------------------------------------------------------------------------------------------------------|--------------------------------------------------------------------|
|                           |                      |                                                      |    |                                                                                                                                                                                                                                                                        | radiological findings (treated as positive in spite negative swab result).                                                                                                                     |                  | distress syndrome                                                                                                                                                                                                                                                                                                                                                                         |                                                                    |
|                           |                      |                                                      |    |                                                                                                                                                                                                                                                                        | Newborns were diagnosed by at least one nasopharyngeal swab.                                                                                                                                   |                  |                                                                                                                                                                                                                                                                                                                                                                                           |                                                                    |
| Easter SR, 2020 USA       | Retrospective cohort | 96 women<br><br>32 mothers with confirmed COVID-19   |    | All critically-ill women with confirmed COVID-19 admitted to 67 ICUs across the country.<br><br>It is unclear how testing was carried out.<br><br>2 groups<br>1) Pregnant women<br>2) Non-pregnant women                                                               | Method of diagnosis is unclear.                                                                                                                                                                | Pregnancy status | COVID-related: all-cause mortality, acute respiratory distress syndrome, respiratory failure, invasive ventilation, oxygenation, acute kidney injury, coagulopathy, ICU length of stay<br><br>Pregnancy-related: preterm delivery, spontaneous preterm delivery, preterm-premature rupture of membranes, mode of delivery – caesarean section and vaginal, pregnancy-induced hypertension | Stillbirth, neonatal death, gestational age at delivery            |
| Flannery DD (1), 2020 USA | Retrospective cohort | 1471 women<br><br>83 mothers with confirmed COVID-19 | 83 | All women who presented for delivery at one hospital and their newborns. Discarded maternal serum samples and neonatal cord blood sera were collected for testing.<br><br>Universal testing was carried out.<br><br>3 groups<br>1) Asymptomatic cases<br>2) Mild cases | Mothers were diagnosed by serology IgG/IgM testing for SARS-CoV-2. Most cases were also diagnosed by nasopharyngeal swabs on admission for delivery and/or tested due to exposure or symptoms. |                  | Pregnancy-related: preterm delivery, mode of delivery – caesarean section and vaginal, gestational diabetes, pregnancy-induced hypertension                                                                                                                                                                                                                                               | Apgar score at 5 minutes, gestational age at delivery, birthweight |

|                            |                      |                                                       |    |                                                                                                                                                                                                                                                                           |                                                                                                                                                                                                                    |                                                                                               |                                                                                                                                                                                                                                                                                                                                                         |                                                                 |
|----------------------------|----------------------|-------------------------------------------------------|----|---------------------------------------------------------------------------------------------------------------------------------------------------------------------------------------------------------------------------------------------------------------------------|--------------------------------------------------------------------------------------------------------------------------------------------------------------------------------------------------------------------|-----------------------------------------------------------------------------------------------|---------------------------------------------------------------------------------------------------------------------------------------------------------------------------------------------------------------------------------------------------------------------------------------------------------------------------------------------------------|-----------------------------------------------------------------|
|                            |                      |                                                       |    | 3) Moderate to critical cases                                                                                                                                                                                                                                             |                                                                                                                                                                                                                    |                                                                                               |                                                                                                                                                                                                                                                                                                                                                         |                                                                 |
|                            |                      |                                                       |    | First twin from each mother was only included in analysis.                                                                                                                                                                                                                | Newborns were diagnosed by serology IgG/IgM testing for SARS-CoV-2. Some newborns from PCR-positive mothers were diagnosed by nasopharyngeal swabs between 24 and 48 hours after birth and met specified criteria. |                                                                                               |                                                                                                                                                                                                                                                                                                                                                         |                                                                 |
| Grechukhina O, 2020 USA    | Retrospective cohort | 1567 women<br><br>141 mothers with confirmed COVID-19 | 76 | All pregnant and postpartum women with laboratory-confirmed COVID-19 reported from three hospitals.<br><br>Testing was carried out either on symptomatic patients or universally on all women admitted after 1 <sup>st</sup> April for delivery or antepartum management. | Mothers were diagnosed by nasopharyngeal swabs.<br><br>Newborns from COVID-positive mothers were diagnosed by nasopharyngeal swabs between 24 and 48 hours of birth.                                               | Age, ethnicity, trimester, co-morbidity, BMI, diabetes, chronic hypertension, asthma, smoking | COVID-related: all-cause mortality, admission to ICU, acute cardiac and hepatic injury, severe pneumonia, respiratory failure, coagulopathy<br><br>Pregnancy-related: preterm and term delivery, spontaneous preterm delivery, mode of delivery – caesarean section and vaginal, pregnancy-induced hypertension, gestational diabetes, induced abortion | Admission to NICU, foetal distress, gestational age at delivery |
| Lira-Lucio JA, 2020 Mexico | Retrospective cohort | 2920 women<br><br>84 mothers with confirmed COVID-19  |    | All women reported with laboratory-confirmed COVID-19.<br><br>It is unclear how testing was carried out.<br><br>2 groups<br>1) Pregnant women with COVID-19                                                                                                               | Method of diagnosis is unclear.                                                                                                                                                                                    | Diabetes, asthma, chronic hypertension, BMI, smoking, co-morbidity                            | COVID-related: all-cause mortality, pneumonia, severe pneumonia, invasive ventilation, admission to ICU and hospital                                                                                                                                                                                                                                    |                                                                 |

|                           |                      |                                                     |    |                                                                                                                                                                                                                                                       |                                                                                                                    |                                                                                                                                                                                                                                                                                       |                                                                   |
|---------------------------|----------------------|-----------------------------------------------------|----|-------------------------------------------------------------------------------------------------------------------------------------------------------------------------------------------------------------------------------------------------------|--------------------------------------------------------------------------------------------------------------------|---------------------------------------------------------------------------------------------------------------------------------------------------------------------------------------------------------------------------------------------------------------------------------------|-------------------------------------------------------------------|
|                           |                      |                                                     |    | 2) Non-pregnant women of childbearing age (15-44 years) with COVID-19                                                                                                                                                                                 |                                                                                                                    |                                                                                                                                                                                                                                                                                       |                                                                   |
|                           |                      |                                                     |    | Mothers whose puerperal status unknown or incorrect were excluded.                                                                                                                                                                                    |                                                                                                                    |                                                                                                                                                                                                                                                                                       |                                                                   |
| Munir SI, 2020 Pakistan   | Prospective cohort   | 20 women<br>20 mothers with confirmed COVID-19      | 9  | All women with laboratory-confirmed COVID-19 admitted to a designated COVID-19 ward at one hospital.<br><br>It is unclear how testing was carried out.                                                                                                | Mothers were diagnosed by nasopharyngeal swabs.<br><br>Newborns were diagnosed by throat swabs.                    | COVID-related: all-cause mortality, invasive ventilation, admission to ICU, oxygenation<br><br>Pregnancy-related: preterm and term delivery, mode of delivery – caesarean section and vaginal, postpartum haemorrhage, pregnancy-induced hypertension, premature rupture of membranes | Foetal distress, respiratory distress syndrome, admission to NICU |
| Murphy C, 2020 Ireland    | Retrospective cohort | 26 women<br>26 mothers with confirmed COVID-19      | 26 | All women with COVID-19 and their newborns admitted to one hospital.<br><br>It is unclear how testing was carried out.                                                                                                                                | Mothers were diagnosed by RT-PCRs.<br><br>Two newborns were tested for SARS-CoV-2. Method of diagnosis is unclear. | Pregnancy-related: preterm delivery                                                                                                                                                                                                                                                   | Admission to NICU, gestational age at delivery, birthweight       |
| Rolnik DL, 2020 Australia | Prospective cohort   | 350 women<br>21 mothers with suspected or confirmed |    | All women attending routine antenatal visits and those who were tested in other hospital settings at three maternity hospitals.<br><br>Universal testing was carried out for women attending antenatal visits. Testing was carried out on symptomatic | Mothers were diagnosed by combined oropharyngeal and nasopharyngeal swabs.                                         |                                                                                                                                                                                                                                                                                       |                                                                   |

|                               |                      |            |                                                  |                                                                                                                                                     |                                                                      |                                                                                                    |
|-------------------------------|----------------------|------------|--------------------------------------------------|-----------------------------------------------------------------------------------------------------------------------------------------------------|----------------------------------------------------------------------|----------------------------------------------------------------------------------------------------|
|                               |                      | COVID-19   | 0 mothers with confirmed COVID-19                | patients in maternity wards, birth suites, pregnancy assessment unit and COVID-19 screening clinic.                                                 |                                                                      |                                                                                                    |
| Sawada M, 2020 Japan          | Retrospective cohort | 886 women  | 1 mother with confirmed COVID-19                 | All pregnant women tested for COVID-19 before delivery or at the time of admission at hospitals in Kyoto.<br><br>Universal testing was carried out. | Mothers were diagnosed by RT-PCRs on nasopharyngeal swabs or saliva. |                                                                                                    |
| ROUND 14                      |                      |            |                                                  |                                                                                                                                                     |                                                                      |                                                                                                    |
| Belokrinskaya TE, 2020 Russia | Retrospective cohort | 167 women  | 167 mothers with suspected or confirmed COVID-19 | All pregnant women reported by hospitals in two districts.<br><br>It is unclear how testing was carried out.                                        | Method of diagnosis is unclear.                                      | COVID-related: all-cause mortality, admission to ICU and hospital, invasive ventilation, pneumonia |
| Joseph N, 2020 USA            | Retrospective cohort | 1882 women | 77 mothers with confirmed COVID-19               | All pregnant women admitted for delivery at two urban hospitals.<br><br>Universal testing was carried out.                                          | Method of diagnosis is unclear.                                      | Age, ethnicity                                                                                     |

|                                     |                      |                                                                     |     |                                                                                                                                                                                                                                                                                                                                                                                                                                                                  |                                                                                                                                                                                                                                                                           |                                                                                                                                                                                                                                                                                                                                                                                                    |                                                                                      |
|-------------------------------------|----------------------|---------------------------------------------------------------------|-----|------------------------------------------------------------------------------------------------------------------------------------------------------------------------------------------------------------------------------------------------------------------------------------------------------------------------------------------------------------------------------------------------------------------------------------------------------------------|---------------------------------------------------------------------------------------------------------------------------------------------------------------------------------------------------------------------------------------------------------------------------|----------------------------------------------------------------------------------------------------------------------------------------------------------------------------------------------------------------------------------------------------------------------------------------------------------------------------------------------------------------------------------------------------|--------------------------------------------------------------------------------------|
| Kalamdani P, 2020 India             | Retrospective cohort | 1229 women<br><br>185 mothers with confirmed COVID-19               | 185 | All pregnant women admitted in labour and newborns at a tertiary care hospital.<br><br>Universal testing was carried out on all pregnant women due to deliver in five days or from hotspot districts. Mothers readmitted for post-partum complications were also tested.                                                                                                                                                                                         | Followed the diagnostic criteria according to Indian Council of Medical Research.<br><br>Mothers were diagnosed by nasopharyngeal swabs.<br><br>Newborns from COVID-positive mothers were diagnosed by nasopharyngeal swabs. Those who were symptomatic were also tested. | Pregnancy-related: mode of delivery – caesarean section                                                                                                                                                                                                                                                                                                                                            | Birthweight, gestational age at delivery, Apgar score at 1 minute, admission to NICU |
| Lai LYH, 2020 France, Spain and USA | Retrospective cohort | 6689 women<br><br>6689 mothers with suspected or confirmed COVID-19 |     | All pregnant women with suspected or confirmed COVID-19 from 6 databases contributing data to CHARYBDIS study.<br><br>It is unclear how testing was carried out.<br><br>2 groups<br>1) Pregnant women with COVID-19<br>2) Pregnant women hospitalised and diagnosed with COVID-19 21 days before or after hospitalisation date<br><br>Women could contribute to both groups.<br><br>Women who did not have at least 365 days of prior observation were excluded. | Method of diagnosis is unclear.                                                                                                                                                                                                                                           | COVID-related: all-cause mortality, admission to hospital, acute renal injury, pneumonia, respiratory failure, anxiety, sepsis, coagulopathy, acute cardiac injury, cardiac failure, acute respiratory distress syndrome<br><br>Pregnancy-related: mode of delivery – caesarean section and vaginal, preterm delivery, gestational diabetes, pregnancy-induced hypertension, abortion, miscarriage | Stillbirth                                                                           |



|                              |                      |                                                                                      |    |                                                                                                                                                                                                                                                                        |                                                                                                                                                                           |                                         |                                                                                                                                                                                                                                                                                                                               |                                                           |
|------------------------------|----------------------|--------------------------------------------------------------------------------------|----|------------------------------------------------------------------------------------------------------------------------------------------------------------------------------------------------------------------------------------------------------------------------|---------------------------------------------------------------------------------------------------------------------------------------------------------------------------|-----------------------------------------|-------------------------------------------------------------------------------------------------------------------------------------------------------------------------------------------------------------------------------------------------------------------------------------------------------------------------------|-----------------------------------------------------------|
| Pachtman Shetty SL, 2020 USA | Retrospective cohort | 20 women<br><br>20 mothers with confirmed COVID-19                                   |    | All laboratory-confirmed pregnant and immediately postpartum women with severe or critical COVID-19 admitted at seven hospitals.<br><br>It is unclear how testing was carried out.<br><br>Women who were admitted for reasons beside COVID-19 treatment were excluded. | Mothers were diagnosed by RT-PCRs.                                                                                                                                        |                                         | COVID-related: all-cause mortality, admission to ICU<br><br>Pregnancy-related: pregnancy-induced hypertension, gestational diabetes                                                                                                                                                                                           |                                                           |
| Sattari M, 2020 Iran         | Retrospective cohort | 50 women<br><br>50 mothers with suspected or confirmed COVID-19                      | 25 | All pregnant women with COVID-19 admitted to hospitals of one province.<br><br>It is unclear how testing was carried out                                                                                                                                               | Mothers and newborns were diagnosed by RT-PCRs.                                                                                                                           |                                         | COVID-related: all-cause mortality, COVID-specific mortality, severe pneumonia, sepsis, acute respiratory distress syndrome, admission to ICU, acute cardiac injury, coagulopathy, hypoproteinaemia, acidosis<br><br>Pregnancy-related: preterm delivery, induced abortion, mode of delivery – caesarean delivery and vaginal | Apgar scores at 1 minute and 5 minutes, admission to NICU |
| Tug N, 2020 Turkey           | Retrospective cohort | 987 women<br><br>188 mothers with suspected or confirmed COVID-19<br><br>180 mothers | 60 | All women aged 18-45 years who were diagnosed with COVID-19 and admitted to four tertiary care hospitals.<br><br>It is unclear how testing was carried out.<br><br>2 groups<br>1) Pregnant women with COVID-19<br>2) Non-pregnant women with COVID-19                  | Laboratory-confirmed mothers were diagnosed by RT-PCRs.<br><br>Clinically-diagnosed mothers were diagnosed by imaging studies (chest CT, lung ultrasound or chest x-ray). | Any symptom, trimester, fever, pregnant | COVID-related: all-cause mortality, invasive ventilation, admission to ICU, oxygenation, central nervous system manifestations<br><br>Pregnancy-related: preterm and term delivery, mode of delivery – caesarean section and vaginal, induced abortion,                                                                       | Gestational age at delivery                               |

|                         |                      |                                                       |    |                                                                                                                                                                                                                                                                                                                                                        |                                                                                                                                                                                                                   |                                                                        |                                                                                                                                                                                                                       |                                                    |
|-------------------------|----------------------|-------------------------------------------------------|----|--------------------------------------------------------------------------------------------------------------------------------------------------------------------------------------------------------------------------------------------------------------------------------------------------------------------------------------------------------|-------------------------------------------------------------------------------------------------------------------------------------------------------------------------------------------------------------------|------------------------------------------------------------------------|-----------------------------------------------------------------------------------------------------------------------------------------------------------------------------------------------------------------------|----------------------------------------------------|
|                         |                      | with confirmed COVID-19                               |    |                                                                                                                                                                                                                                                                                                                                                        |                                                                                                                                                                                                                   |                                                                        | pregnancy-induced hypertension, gestational diabetes                                                                                                                                                                  |                                                    |
| Ullah R, 2020 Pakistan  | Retrospective cohort | 303 women<br><br>31 mothers with confirmed COVID-19   |    | All pregnant women admitted at several hospitals.<br><br>Universal testing was carried out.                                                                                                                                                                                                                                                            | Mothers were diagnosed by nasopharyngeal swabs on admission.                                                                                                                                                      |                                                                        |                                                                                                                                                                                                                       |                                                    |
| Uzel K (1), 2020 Turkey | Prospective cohort   | 33 women<br><br>33 mothers with confirmed COVID-19    |    | All pregnant women admitted to a hospital.<br><br>Testing was carried out on symptomatic patients and those with history of contact with cases.                                                                                                                                                                                                        | Mothers were diagnosed with RT-PCRs.                                                                                                                                                                              | Age, fever, gestational age                                            |                                                                                                                                                                                                                       |                                                    |
| Yang R, 2020 China      | Retrospective cohort | 11078 women<br><br>65 mothers with confirmed COVID-19 | 58 | All pregnant women with and without COVID-19 who delivered single live births in Wuhan.<br><br>Testing was initially carried out on patients with symptoms or who had an abnormal CT scan. Universal screening was carried out from 4 <sup>th</sup> February.<br><br>2 groups<br>1) Pregnant women with COVID-19<br>2) Pregnant women without COVID-19 | Followed diagnostic criteria according to National Health Commission of China.<br><br>Mothers were diagnosed by pharyngeal swabs.<br><br>A proportion of newborns were tested but method of diagnosis is unclear. | Age, chronic hypertension, gestational diabetes, pre-eclampsia, parity | COVID-related: all-cause mortality<br><br>Pregnancy-related: preterm delivery, mode of delivery – caesarean section and vaginal, pregnancy-induced hypertension, gestational diabetes, premature rupture of membranes | Neonatal death, foetal distress, neonatal asphyxia |

|                              |                      |                                                                   |     |                                                                                                                                                                                                         |                                                                                                                                         |                                                                                                                                 |                                                               |
|------------------------------|----------------------|-------------------------------------------------------------------|-----|---------------------------------------------------------------------------------------------------------------------------------------------------------------------------------------------------------|-----------------------------------------------------------------------------------------------------------------------------------------|---------------------------------------------------------------------------------------------------------------------------------|---------------------------------------------------------------|
|                              |                      |                                                                   |     | Women with COVID-19 related symptoms but at least two negative COVID-19 results were excluded.                                                                                                          |                                                                                                                                         |                                                                                                                                 |                                                               |
| Cavaliere AF (1), 2020 Italy | Retrospective cohort | 902 women<br><br>2 mothers with confirmed COVID-19                |     | All pregnant women who were admitted to an obstetric unit for delivery.<br><br>Testing was initially carried out on symptomatic patients. Universal testing was carried out from 4 <sup>th</sup> April. | Mothers were diagnosed by nasopharyngeal swabs.                                                                                         | COVID-related: pneumonia<br><br>Pregnancy-related: mode of delivery – vaginal, premature rupture of membranes, chorioamnionitis |                                                               |
| Haye M (1), 2020 Chile       | Prospective cohort   | 303 women<br><br>303 mothers with suspected or confirmed COVID-19 | 303 | All pregnant women with COVID-19 admitted to a tertiary centre.<br><br>It is unclear how testing was carried out.                                                                                       | Mothers may have been diagnosed by RT-PCRs. Method of diagnosis is unclear.                                                             | COVID-related: pneumonia, admission to ICU and hospital, all-cause mortality<br><br>Pregnancy-related: preterm delivery         | Neonatal death                                                |
| Haye M, 2020 Chile           | Prospective cohort   | 127 women<br><br>34 mothers with confirmed COVID-19               | 22  | All women admitted to maternity ward of a tertiary hospital.<br><br>Universal testing was carried out.                                                                                                  | Mothers were diagnosed by nasopharyngeal swabs on admission.<br><br>Newborns born to COVID-positive mothers were tested for SARS-CoV-2. | COVID-related: pneumonia, admission to ICU<br><br>Pregnancy-related: preterm delivery                                           | Stillbirth, congenital malformation, Apgar score at 5 minutes |

|                                      |                      |                                                      |    |                                                                                                                                                                                                                                                                                                                                                            |                                                                |                                                                                             |                                                                                                                                                                                                                                        |                                                                                                                                                       |
|--------------------------------------|----------------------|------------------------------------------------------|----|------------------------------------------------------------------------------------------------------------------------------------------------------------------------------------------------------------------------------------------------------------------------------------------------------------------------------------------------------------|----------------------------------------------------------------|---------------------------------------------------------------------------------------------|----------------------------------------------------------------------------------------------------------------------------------------------------------------------------------------------------------------------------------------|-------------------------------------------------------------------------------------------------------------------------------------------------------|
| Lumley SF, 2020 UK                   | Retrospective cohort | 1000 women<br><br>53 mothers with confirmed COVID-19 |    | Pregnant women in the first trimester of pregnancy who had their antenatal serum samples taken in the Oxford area.<br><br>Universal testing was carried out.<br><br>Women whose electronic patient records were not available and those with a missing postcode were excluded.                                                                             | Mothers were diagnosed by serology IgG testing for SARS-CoV-2. |                                                                                             |                                                                                                                                                                                                                                        |                                                                                                                                                       |
| Mercedes BR, 2020 Dominican Republic | Retrospective cohort | 15 women<br><br>15 mothers with confirmed COVID-19   | 15 | Laboratory-confirmed pregnant women admitted to a tertiary level hospital and developed myocardial injury.<br><br>It is unclear how testing was carried out.                                                                                                                                                                                               | Mothers were diagnosed by nasopharyngeal swabs.                | Age, any comorbidity, BMI, trimester                                                        | COVID-related: all-cause mortality, invasive ventilation, admission to ICU, acute cardiac injury, severe pneumonia<br><br>Pregnancy-related: preterm delivery, mode of delivery – caesarean section and vaginal, antenatal haemorrhage | Stillbirth, admission to NICU, Apgar scores at 5 minutes, birthweight – low birthweight defined as less than 2.5 kilograms, gestation age at delivery |
| Patberg ET, 2020 USA                 | Retrospective cohort | 133 women<br><br>77 mothers with confirmed COVID-19  | 77 | All women who were admitted at term for delivery in a hospital.<br><br>Universal testing was carried out.<br><br>2 groups<br>1) Pregnant women with COVID-19<br>2) Pregnant women without COVID-19<br><br>Mothers who delivered at less than 37 weeks were excluded. Mothers with obstetric or medical complications were excluded from the control group. | Mothers and newborns were diagnosed by nasopharyngeal swabs.   | Age, ethnicity, diabetes, gestational diabetes, pre-eclampsia, BMI, parity, gestational age | COVID-related: oxygenation, admission to ICU<br><br>Pregnancy-related: mode of delivery – caesarean section and vaginal, pregnancy-induced hypertension, gestational diabetes, chorioamnionitis                                        | Gestation age at delivery, birthweight, Apgar scores at 1 minute and 5 minutes, admission to NICU, foetal growth restriction                          |

|                           |                      |                                                        |    |                                                                                                                                                                                                                                                                                                                                                                             |                                                                                                                                                       |                               |                                                                                                                                                                                                                                                                                                    |
|---------------------------|----------------------|--------------------------------------------------------|----|-----------------------------------------------------------------------------------------------------------------------------------------------------------------------------------------------------------------------------------------------------------------------------------------------------------------------------------------------------------------------------|-------------------------------------------------------------------------------------------------------------------------------------------------------|-------------------------------|----------------------------------------------------------------------------------------------------------------------------------------------------------------------------------------------------------------------------------------------------------------------------------------------------|
| Rios-Silva M, 2020 Mexico | Retrospective cohort | 19606 women<br><br>448 mothers with confirmed COVID-19 |    | All women of reproductive age (13-49 years old) from the open national COVID-19 database from the Ministry of Health.<br><br>Symptomatic testing was carried out.<br><br>3 groups<br>1) Pregnant women with COVID-19<br>2) Pregnant women without COVID-19<br>3) Non-pregnant women with COVID-19<br><br>Women with missing clinical or epidemiological data were excluded. | Women were diagnosed by RT-PCRs.                                                                                                                      | Any comorbidity, asthma, COPD | COVID-related: all-cause mortality, pneumonia, invasive ventilation, admission to ICU and hospital, time from illness onset to outcome                                                                                                                                                             |
| Santhosh J, 2020 Oman     | Retrospective cohort | 60 women<br><br>60 mothers with confirmed COVID-19     | 48 | Pregnant and immediate postpartum women with laboratory-confirmed COVID-19 who were admitted to one hospital.<br><br>It is not clear how testing was carried out.<br><br>3 groups<br>1) Asymptomatic cases<br>2) Mild cases<br>3) Moderate/severe cases                                                                                                                     | Mothers were diagnosed by nasopharyngeal and oropharyngeal swabs.<br><br>Some newborns were tested for SARS-CoV-2. Method of diagnosis is not stated. |                               | COVID-related: all-cause mortality, pneumonia, acute respiratory distress syndrome, admission to ICU and hospital, coagulopathy, severe pneumonia, septic shock<br><br>Pregnancy-related: preterm and term delivery, spontaneous preterm delivery, preterm premature rupture of membranes, mode of |

|                        |                      |                                                     |    |                                                                                                                                                                                                         |                                                                   |                                                                                                                 |                                                                                                                                                                                                                                                                                                                                                                                              |                                                                                                                         |
|------------------------|----------------------|-----------------------------------------------------|----|---------------------------------------------------------------------------------------------------------------------------------------------------------------------------------------------------------|-------------------------------------------------------------------|-----------------------------------------------------------------------------------------------------------------|----------------------------------------------------------------------------------------------------------------------------------------------------------------------------------------------------------------------------------------------------------------------------------------------------------------------------------------------------------------------------------------------|-------------------------------------------------------------------------------------------------------------------------|
|                        |                      |                                                     |    |                                                                                                                                                                                                         |                                                                   |                                                                                                                 | delivery – caesarean section and vaginal, postpartum haemorrhage, gestational diabetes, miscarriage, pregnancy-induced hypertension                                                                                                                                                                                                                                                          |                                                                                                                         |
| Yazihan N, 2020 Turkey | Prospective cohort   | 187 women<br><br>95 mothers with confirmed COVID-19 |    | Pregnant women admitted to a tertiary healthcare facility.<br><br>It is not clear how testing was carried out.<br><br>2 groups<br>1) Pregnant women with COVID-19<br>2) Pregnant women without COVID-19 | Mothers were diagnosed by nasopharyngeal and oropharyngeal swabs. | Age, any comorbidity, asthma, diabetes, chronic hypertension, gestational diabetes, pre-eclampsia, BMI, obesity | COVID-related: coagulopathy<br><br>Pregnancy-related: miscarriage, pregnancy-induced hypertension, preterm delivery, gestational diabetes                                                                                                                                                                                                                                                    |                                                                                                                         |
| ROUND 15               |                      |                                                     |    |                                                                                                                                                                                                         |                                                                   |                                                                                                                 |                                                                                                                                                                                                                                                                                                                                                                                              |                                                                                                                         |
| Bachini S, 2020 India  | Retrospective cohort | 57 women<br><br>57 mothers with confirmed COVID-19  | 56 | All women who delivered at a COVID facility in a tertiary care hospital.<br><br>Testing was carried out on symptomatic patients, high risk contacts of confirmed cases or those from containment areas. | Mothers and neonates were diagnosed by nasopharyngeal swabs.      |                                                                                                                 | COVID-related: all-cause mortality, invasive and non-invasive ventilation, admission to ICU, acute cardiac and renal injury, coagulopathy, septic shock, acidosis<br><br>Pregnancy-related: preterm and term delivery, preterm spontaneous delivery, mode of delivery – caesarean section and vaginal, gestational diabetes, pregnancy-induced hypertension, induced labour, wound infection | Neonatal death, admission to NICU, foetal distress, birthweight, gestational age at delivery, small-for-gestational-age |

|                             |                      |                                                     |    |                                                                                                                                                                                                                                                                                                                                                                                                                                                                                                                                    |                                                      |                                                                                                                       |                                                                                                                                                                                                                                                             |                                                                          |
|-----------------------------|----------------------|-----------------------------------------------------|----|------------------------------------------------------------------------------------------------------------------------------------------------------------------------------------------------------------------------------------------------------------------------------------------------------------------------------------------------------------------------------------------------------------------------------------------------------------------------------------------------------------------------------------|------------------------------------------------------|-----------------------------------------------------------------------------------------------------------------------|-------------------------------------------------------------------------------------------------------------------------------------------------------------------------------------------------------------------------------------------------------------|--------------------------------------------------------------------------|
| Cuñarro-López Y, 2020 Spain | Retrospective cohort | 111 women<br><br>68 mothers with confirmed COVID-19 |    | <p>All symptomatic pregnant women with suspected COVID-19 admitted and tested at a tertiary centre in Madrid.</p> <p>Testing was carried out on symptomatic patients.</p> <p>2 groups</p> <ol style="list-style-type: none"> <li>1) Pregnant and puerperal women with laboratory-confirmed COVID-19</li> <li>2) Pregnant and puerperal women with negative COVID-19 test</li> </ol> <p>Women with an unclear test result, those who did not undergo obstetric follow-up and asymptomatic patients with COVID-19 were excluded.</p> | Mothers were diagnosed by nasal or pharyngeal swabs. | Ethnicity, age, smoking, any comorbidity, BMI, parity, symptoms, fever, cough, breathlessness                         | <p>COVID-related: all-cause mortality, pneumonia, severe admission to ICU, oxygenation</p> <p>Pregnancy-related: preterm delivery, mode of delivery – caesarean section and vaginal</p>                                                                     | Neonatal death, admission to NICU, birthweight, Apgar score at 5 minutes |
| Dhuyvetter A, 2020 USA      | Retrospective cohort | 208 women<br><br>23 mothers with confirmed COVID-19 | 23 | <p>All pregnant women admitted to hospital and those presenting in outpatient.</p> <p>Universal screening was carried out on all pregnant women admitted to hospital. In the outpatient department, women with symptoms or within 48 hours of elective admission were tested.</p> <p>2 groups</p> <ol style="list-style-type: none"> <li>1) COVID positive</li> <li>2) COVID negative</li> </ol>                                                                                                                                   | Method of diagnosis is unclear.                      | Age, ethnicity, obesity, diabetes, chronic hypertension, asthma, gestational diabetes, pregnancy induced hypertension | <p>COVID-related: invasive ventilation, admission to ICU and hospital, coagulopathy</p> <p>Pregnancy-related: preterm delivery, mode of delivery – caesarean section or vaginal, gestational diabetes, pregnancy-induced hypertension, chorioamnionitis</p> | Gestational age at delivery, small-for-gestational age                   |

|                            |                      |                                                      |    |                                                                                                                                                                                                                                                                                         |                                                                                                                                                                                                |                                                                                                      |                                                                                                                                                                                                                             |                                                                                                                                                                                                           |
|----------------------------|----------------------|------------------------------------------------------|----|-----------------------------------------------------------------------------------------------------------------------------------------------------------------------------------------------------------------------------------------------------------------------------------------|------------------------------------------------------------------------------------------------------------------------------------------------------------------------------------------------|------------------------------------------------------------------------------------------------------|-----------------------------------------------------------------------------------------------------------------------------------------------------------------------------------------------------------------------------|-----------------------------------------------------------------------------------------------------------------------------------------------------------------------------------------------------------|
| Di Martino D, 2020 Italy   | Prospective cohort   | 250 women<br><br>250 mothers with confirmed COVID-19 |    | All women with laboratory-confirmed COVID-19 admitted during pregnancy or in the immediate postpartum period at seven hospitals.<br><br>It is unclear how testing was carried out.<br><br>3 groups<br>1) Asymptomatic cases<br>2) Non-severe cases<br>3) Severe cases                   | Mothers were diagnosed by nasopharyngeal swabs.                                                                                                                                                | Ethnicity, parity, obesity, any comorbidity                                                          | COVID-related: pneumonia, severe pneumonia, all-cause mortality, admission to ICU, oxygenation                                                                                                                              |                                                                                                                                                                                                           |
| Egerup P (1), 2020 Denmark | Prospective cohort   | 1313 women<br><br>30 mothers with confirmed COVID-19 | 28 | All pregnant women who delivered at a hospital.<br><br>Universal screening was carried out.<br><br>2 groups<br>1) Women positive for SARS-CoV-2 antibodies<br>2) Women negative for SARS-CoV-2 antibodies                                                                               | Mothers were diagnosed by pharyngeal swabs and serology IgG/IgM testing for SARS-CoV-2 on admission.<br><br>Newborns were diagnosed by serology IgG/IgM testing for SARS-CoV-2 after delivery. | Age, BMI, smoking, asthma, any comorbidity, gestational diabetes                                     | Pregnancy-related: gestational diabetes, pregnancy-induced hypertension, preterm-premature rupture of membranes, preterm delivery, induced labour, mode of delivery – caesarean section and vaginal, postpartum haemorrhage | Gestational age at delivery, stillbirth, birthweight – low birthweight defined as less than 2500 grams, Apgar scores at 1 minute and 5 minutes, cord blood pH, congenital malformation, admission to NICU |
| Fernandez ABS, 2020 Cuba   | Retrospective cohort | 60 women<br><br>6 mothers with confirmed COVID-19    |    | All obstetric patients admitted to a hospital.<br><br>It is unclear how testing was carried out. Screening was undertaken for all women with suspected COVID-19 infection.<br><br>2 groups<br>1) Women with positive RT-PCR<br>2) Women with negative RT-PCR<br><br>None were excluded. | Mothers were diagnosed by nasopharyngeal swabs.                                                                                                                                                | Age, parity, asthma, chronic hypertension, obesity, diabetes, fever, cough, breathlessness, symptoms | COVID-related: all-cause mortality, admission to ICU, severe pneumonia<br><br>Pregnancy-related: miscarriage                                                                                                                |                                                                                                                                                                                                           |



|                                 |                      |                                                       |     |                                                                                                                                                                                                                                                   |                                                                                                                                                          |                                                                                                                                                                                              |                                                                                                                                               |
|---------------------------------|----------------------|-------------------------------------------------------|-----|---------------------------------------------------------------------------------------------------------------------------------------------------------------------------------------------------------------------------------------------------|----------------------------------------------------------------------------------------------------------------------------------------------------------|----------------------------------------------------------------------------------------------------------------------------------------------------------------------------------------------|-----------------------------------------------------------------------------------------------------------------------------------------------|
| Figueiredo R (1), 2020 Portugal | Prospective cohort   | 184 women<br><br>11 mothers with confirmed COVID-19   | 11  | All pregnant women admitted for delivery to a tertiary hospital.<br><br>Universal screening was carried out.<br><br>Women with threatened preterm labour in which delivery did not take place until end of study duration were excluded.          | Mothers were diagnosed by nasopharynx and oropharynx swabs.<br><br>Newborns were tested after delivery and on the second and fifteenth day of life.      | Pregnancy-related: preterm delivery, mode of delivery – caesarean section and vaginal                                                                                                        | Gestational age at delivery                                                                                                                   |
| Janssen O, 2020 USA             | Retrospective cohort | 1794 women<br><br>180 mothers with confirmed COVID-19 | 180 | All pregnant women admitted to a single health system, identified from electronic medical records.<br><br>Universal screening was carried out.                                                                                                    | Method of diagnosis is unclear.                                                                                                                          | COVID-related: admission to ICU, severe pneumonia<br><br>Pregnancy-related: preterm delivery, spontaneous preterm delivery, gestational diabetes, antepartum haemorrhage                     | Stillbirth                                                                                                                                    |
| Martenot A, 2020 France         | Retrospective cohort | 26 women<br><br>26 mothers with confirmed COVID-19    | 26  | All pregnant women with COVID-19 in last two weeks of pregnancy and their neonates born at term or near term in hospital in Alsace, France.<br><br>It is unclear how testing was carried out.                                                     | Method of diagnosis was unclear for mothers.<br><br>Neonates were diagnosed with RT-PCR by nasopharyngeal and stool or anal swabs at birth and on day 3. | COVID-related: ARDS<br><br>Pregnancy-related: Preterm delivery, mode of delivery – caesarean section and vaginal delivery, pregnancy-induced hypertension                                    | Admission to NICU, birthweight, SGA, apgar at 5', admission to the neonatal unit, RDS                                                         |
| Rottenstreich A, 2020 Israel    | Prospective cohort   | 52 women<br><br>52 mothers with confirmed COVID-19    | 52  | All pregnant women with COVID-19 admitted for delivery in one of seven hospitals in Israel.<br><br>Exclusion criteria: women diagnosed at puerperium or women with previous confirmed COVID-19 that has resolved prior to delivery were excluded. | Mothers were diagnosed with RT-PCR by nasopharyngeal swab.<br><br>Neonates were diagnosed with RT-PCR by nasopharyngeal swab twice at 24                 | COVID-related: Admission to ICU, invasive ventilation, coagulopathy,<br><br>Pregnancy-related: gestational diabetes, pregnancy-induced hypertension, mode of delivery – vaginal delivery and | Gestational age at delivery, birthweight, apgar score at 5', admission to NICU, RDS, foetal distress, neonatal sepsis, neonatal asphyxia, NEC |

|                          |                      |                                                      |     |                                                                                                                                                                                                                                                                               |                                                                                                                                                                                                                      |                                                                                                                                    |                                                                                                                                                                                                                                                                                                                                                                                |                                                                                                                                    |
|--------------------------|----------------------|------------------------------------------------------|-----|-------------------------------------------------------------------------------------------------------------------------------------------------------------------------------------------------------------------------------------------------------------------------------|----------------------------------------------------------------------------------------------------------------------------------------------------------------------------------------------------------------------|------------------------------------------------------------------------------------------------------------------------------------|--------------------------------------------------------------------------------------------------------------------------------------------------------------------------------------------------------------------------------------------------------------------------------------------------------------------------------------------------------------------------------|------------------------------------------------------------------------------------------------------------------------------------|
|                          |                      |                                                      |     | Universal screening was carried out.                                                                                                                                                                                                                                          | and 48 hours after delivery.                                                                                                                                                                                         |                                                                                                                                    | caesarean section, postpartum haemorrhage                                                                                                                                                                                                                                                                                                                                      |                                                                                                                                    |
| Sahin D (2), 2020 Turkey | Prospective cohort   | 533 women<br><br>533 mothers with confirmed COVID-19 | 133 | All laboratory confirmed pregnancy women attending follow-up at city hospital in Turkey.<br><br>It is unclear how testing was carried out.                                                                                                                                    | Mothers were diagnosed with RT-PCR by nasopharyngeal and oropharyngeal swabs.<br><br>Neonates were diagnosed with RT-PCR by nasopharyngeal and oropharyngeal swabs on first, third and 14 <sup>th</sup> day of life. |                                                                                                                                    | COVID-related: admission to ICU, all-cause mortality, invasive ventilation, oxygenation, non-invasive ventilation, acute cardiac injury, sepsis, ARDS<br><br>Pregnancy-related: mode of delivery – caesarean section and vaginal delivery, miscarriage (spontaneous), prelabour rupture of membranes at (or near) term, pregnancy-induced hypertension, antepartum haemorrhage | Congenital malformation, gestational age at delivery, birthweight, admission to NICU, fetal growth restriction, apgar at 1' and 5' |
| Soffer MD, 2020 USA      | Retrospective cohort | 67 women<br><br>67 mothers with confirmed COVID-19   |     | All laboratory-confirmed symptomatic pregnant women attending antenatal care in medical centre.<br><br>2 groups<br>1) Pregnant women managed in outpatient department<br>2) Pregnant women hospitalised for COVID-19<br><br>Exclusion criteria: women receiving care at other | Mothers were diagnosed with RT-PCR by nasopharyngeal swab                                                                                                                                                            | Age, parity, ethnicity, BMI, gestational diabetes, diabetes, chronic hypertension, asthma, fever, cough, breathlessness, trimester | COVID-related: Admission to hospital. Admission to ICU, invasive ventilation, ICU length of stay<br><br>Pregnancy-related: gestational diabetes                                                                                                                                                                                                                                |                                                                                                                                    |

|                                                                                                                                                                                   |                      |                                                     |     |                                                                                                                                                                                                                                                                            |                                 |                                                                                                                                                                                                                   |                                                                                                                                                                                                                                           |                                                                      |
|-----------------------------------------------------------------------------------------------------------------------------------------------------------------------------------|----------------------|-----------------------------------------------------|-----|----------------------------------------------------------------------------------------------------------------------------------------------------------------------------------------------------------------------------------------------------------------------------|---------------------------------|-------------------------------------------------------------------------------------------------------------------------------------------------------------------------------------------------------------------|-------------------------------------------------------------------------------------------------------------------------------------------------------------------------------------------------------------------------------------------|----------------------------------------------------------------------|
|                                                                                                                                                                                   |                      |                                                     |     | institution or who were transferred for inpatient management to institution were excluded.                                                                                                                                                                                 |                                 |                                                                                                                                                                                                                   |                                                                                                                                                                                                                                           |                                                                      |
|                                                                                                                                                                                   |                      |                                                     |     | Symptomatic screening was carried out.                                                                                                                                                                                                                                     |                                 |                                                                                                                                                                                                                   |                                                                                                                                                                                                                                           |                                                                      |
| Sun G, 2020 China                                                                                                                                                                 | Retrospective cohort | 180 women<br><br>60 mothers with confirmed COVID-19 |     | All pregnant women admitted for delivery at a hospital in Wuhan.<br><br>2 groups<br>1) Pregnant women delivering in hospital<br>2) Matched-control pregnant women delivering in hospital 1 year before COVID-19 epidemic<br><br>It is unclear how testing was carried out. | Method of diagnosis is unclear. | Parity, diabetes, any comorbidity, chronic hypertension, age, gestational age                                                                                                                                     | Pregnancy-related: mode of delivery – caesarean section and vaginal delivery                                                                                                                                                              | Gestational age at delivery, birthweight, appgar scores at 1' and 5' |
| Vouga M (1), 2020 Belgium, Brazil, Canada, Chile, China, Colombia, France, French Guyana, Germany, Ireland, Italy, Israel, Portugal, Spain, Switzerland, United States of America | Prospective cohort   | 1033 women<br><br>926 women with confirmed COVID-19 | 798 |                                                                                                                                                                                                                                                                            |                                 | Age, ethnicity, parity, any comorbidity, chronic hypertension, diabetes, obesity, smoking, pre-eclampsia, gestational diabetes, trimester, symptoms, fever, cough, breathlessness, pregnancy induced hypertension | COVID-related: all-cause mortality, admission to ICU<br><br>Pregnancy-related: induced abortion, preterm delivery, spontaneous preterm delivery, preterm-premature rupture of membranes, mode of delivery – caesarean section and vaginal | Stillbirth, neonatal death, admission to NICU, neonatal sepsis       |

|                        |                      |                                                    |    |                                                                                                                                                                                  |                                                                                                                                                                                                 |                                                 |                                                                                                                                                                                                                                                                                                               |                                                                    |
|------------------------|----------------------|----------------------------------------------------|----|----------------------------------------------------------------------------------------------------------------------------------------------------------------------------------|-------------------------------------------------------------------------------------------------------------------------------------------------------------------------------------------------|-------------------------------------------------|---------------------------------------------------------------------------------------------------------------------------------------------------------------------------------------------------------------------------------------------------------------------------------------------------------------|--------------------------------------------------------------------|
| Curi B, 2020 USA       | Retrospective cohort | 33 women<br><br>33 mothers with confirmed COVID-19 |    | All symptomatic pregnant women with COVID-19 at a public hospital and COVID-19 centre in New York City.<br><br>Symptomatic screening was undertaken.                             | Method of diagnosis is unclear.                                                                                                                                                                 | Diabetes, chronic hypertension, obesity, asthma | COVID-related:<br>Admission to hospital, invasive ventilation, admission to ICU, acute respiratory failure, all-cause mortality, oxygenation, acidosis<br><br>Pregnancy-related:<br>Miscarriage, preterm delivery, gestational diabetes, pregnancy-induced hypertension, mode of delivery – caesarean section | Neonatal death                                                     |
| Lopian M, 2020 Israel  | Retrospective cohort | 21 women<br><br>21 mothers with confirmed COVID-19 | 21 | All laboratory-confirmed pregnancy women with COVID-19.<br><br>Screening was undertaken in symptomatic mothers and mother who had a history of exposure to infected individuals. | Mothers and neonates were diagnosed with RT-PCR by nasopharyngeal swab.<br><br>Neonates were tested at birth and if positive for COVID-19 were tested at 24, 48 hours and 5-7 days after birth. | Parity, symptoms, lymphopaenia, raised CRP      | COVID-related:<br>Oxygenation, admission to ICU, invasive ventilation, all-cause mortality, acidosis<br><br>Pregnancy-related:<br>Gestational diabetes, prelabour rupture of membranes at (or near) term, mode of delivery – vaginal delivery and caesarean section, chorioamnionitis                         | Gestational age at delivery, apgar score at 1' and 5', birthweight |
| Moghadam SA, 2020 Iran | Retrospective cohort | 15 women<br><br>15 mothers with confirmed COVID-19 |    | All laboratory-confirmed pregnant women with COVID-19 who died in a tertiary referral hospital.<br><br>It is unclear how testing was carried out.                                | Mothers were diagnosed with RT-PCR by nasopharyngeal swab.                                                                                                                                      |                                                 | COVID-related: All-cause mortality, admission to hospital, time from illness onset to outcome (death), ARDS, acute respiratory failure, sepsis, septic shock, coagulopathy, acute kidney injury, acute                                                                                                        |                                                                    |

|                        |                      |                                                       |     |                                                                                                                                                                                                                                                                                                                          |                                                                                                                                                                                                                           |                                                                                                                                                                 |            |
|------------------------|----------------------|-------------------------------------------------------|-----|--------------------------------------------------------------------------------------------------------------------------------------------------------------------------------------------------------------------------------------------------------------------------------------------------------------------------|---------------------------------------------------------------------------------------------------------------------------------------------------------------------------------------------------------------------------|-----------------------------------------------------------------------------------------------------------------------------------------------------------------|------------|
|                        |                      |                                                       |     |                                                                                                                                                                                                                                                                                                                          |                                                                                                                                                                                                                           | cardiac injury,<br>acidosis                                                                                                                                     |            |
|                        |                      |                                                       |     |                                                                                                                                                                                                                                                                                                                          |                                                                                                                                                                                                                           | Pregnancy-related:<br>Gestational diabetes                                                                                                                      |            |
| Sri Sri G, 2020 India  | Prospective cohort   | 6711 women<br><br>730 mothers with confirmed COVID-19 | 506 | All pregnant women admitted for delivery or women within one week of their estimated delivery date.                                                                                                                                                                                                                      | Mothers were diagnosed with RT-PCR or Rapid Antigen Test Kits depending on availability of kits and time remaining for delivery.<br><br>All newborns were tested between fourth and seventh day for COVID-19 with RT-PCR. | COVID-related:<br>Admission to hospital<br><br>Pregnancy-related:<br>Mode of delivery – caesarean section and vaginal delivery                                  | Stillbirth |
| Trahan MJ, 2020 Canada | Retrospective cohort | 803 women<br><br>41 mothers with confirmed COVID-19   |     | All laboratory-confirmed pregnant women with COVID-18 admitted to general hospital.<br><br>Initially, testing was restricted to at-risk patients who were identified through the use of a screening programme. From 15 May 2020, universal testing implemented, and all pregnant women admitted to hospital were tested. | Mothers were diagnosed with RT-PCR by nasopharyngeal swab.                                                                                                                                                                | COVID-related:<br>admission to hospital, oxygenation, admission to ICU, invasive ventilation, all-cause mortality<br><br>Pregnancy-related:<br>preterm delivery |            |

|                        |                    |                                                             |    |                                                                                                                                                                                                                                                                                                                                                               |                                                                                                                                                                                                             |     |                                                                                                                                                                                                        |                                                                                                                 |
|------------------------|--------------------|-------------------------------------------------------------|----|---------------------------------------------------------------------------------------------------------------------------------------------------------------------------------------------------------------------------------------------------------------------------------------------------------------------------------------------------------------|-------------------------------------------------------------------------------------------------------------------------------------------------------------------------------------------------------------|-----|--------------------------------------------------------------------------------------------------------------------------------------------------------------------------------------------------------|-----------------------------------------------------------------------------------------------------------------|
| Wang Y (1), 2020 China | Prospective cohort | 72 women<br>72 mothers with suspected or confirmed COVID-19 | 57 | All laboratory-confirmed pregnant women with COVID-19 from the National Epidemic Reporting System<br><br>Exclusion criteria: women with onset of COVID-19 occurring before or after pregnancy and those who were lost to follow up (3 months after delivery) were excluded.                                                                                   | Mothers were diagnosed with RT-PCR by nasopharyngeal swab.<br><br>Neonates were diagnosed with RT-PCR by throat swab.<br><br>Followed diagnostic criteria according to National Health Commission of China. |     | COVID-related: All-cause mortality, depression<br><br>Pregnancy-related: Induced abortion, mode of delivery – caesarean section and vaginal delivery, preterm delivery                                 | Birthweight, neonatal asphyxia, foetal distress, neonatal infection, congenital malformation, admission to NICU |
| Zheng J, 2020 China    | Prospective cohort | 48 women<br>13 mothers with confirmed COVID-19              | 57 | All pregnant women delivering premature infants that were admitted to NICU.<br><br>Universal screening was undertaken,                                                                                                                                                                                                                                        | Neonates were diagnosed with RT-PCR by nasopharyngeal swab and peripheral blood within 30 minutes after birth.                                                                                              |     | Pregnancy-related: Preterm delivery, mode of delivery – caesarean section and vaginal delivery, prelabour rupture of membranes at (or near) term, gestational diabetes, pregnancy-induced hypertension | Admission to NICU, congenital malformation, apgar scores at 1' and 5', gestational age at delivery, birthweight |
| ROUND 16               |                    |                                                             |    |                                                                                                                                                                                                                                                                                                                                                               |                                                                                                                                                                                                             |     |                                                                                                                                                                                                        |                                                                                                                 |
| Biasucci G, 2020 Italy | Prospective cohort | 144 women<br>15 mothers with confirmed COVID-19             | 15 | All pregnant women referred to the Labour Unit at one hospital were tested for COVID-19.<br><br>Testing was carried out either on symptomatic patients, patients with close contact with known SARS-CoV-2 patients, patients who had travelled to COVID-19 exposed countries during the past 14 days, patients who were healthcare professionals working in a | Mothers were diagnosed by RT-PCRs on nasopharyngeal swabs.<br><br>Newborns from COVID positive mothers were tested by RT-PCRs on nasopharyngeal swab at birth, on day 3 and/or day 7 during their           | Age | Pregnancy-related: Preterm and term delivery, mode of delivery – caesarean section and vaginal                                                                                                         | Gestational age at delivery, birthweight, Apgar score at 1 minute and 5 minutes                                 |

|                        |                    |                                                      |     |                                                                                                                                                                                                                                                                        |                                                                                                                                                                                                                             |                                                                                                                                          |                                                                                                                                                                 |
|------------------------|--------------------|------------------------------------------------------|-----|------------------------------------------------------------------------------------------------------------------------------------------------------------------------------------------------------------------------------------------------------------------------|-----------------------------------------------------------------------------------------------------------------------------------------------------------------------------------------------------------------------------|------------------------------------------------------------------------------------------------------------------------------------------|-----------------------------------------------------------------------------------------------------------------------------------------------------------------|
|                        |                    |                                                      |     | dedicated COVID-19 area or universally on all women referred to the labour unit after April 24 <sup>th</sup> .                                                                                                                                                         | hospital stay. In case of positive result, neonates were re-tested on day 14.                                                                                                                                               |                                                                                                                                          |                                                                                                                                                                 |
| Jiménez IM, 2020 Spain | Prospective cohort | 403 women<br><br>403 mothers with confirmed COVID-19 | 403 | All pregnant women with confirmed COVID-19 admitted to one of 70 centers.<br><br>It is unclear how testing was carried out.<br><br>2 groups:<br>1) Pregnant women with COVID-19 with early cord clamping<br>2) Pregnant women with COVID-19 with delayed cord clamping | Mothers were diagnosed by RT-PCRs on nasopharyngeal swabs.<br><br>Neonates were tested for COVID-19 by RT-PCR from nasopharyngeal swabs. They were retested if symptomatic or had a positive test within 12 hours of birth. | Pregnancy-related: Preterm and term delivery, mode of delivery – caesarean section and vaginal, induction of labour                      | Gestational age at delivery, birthweight, Apgar score at 1 minute and 5 minutes, admission to neonatal unit, cord blood pH, stillbirth, congenital malformation |
| Orisaka M, 2020 Japan  | Prospective cohort | 805 women<br><br>0 mothers with confirmed COVID-19   |     | All pregnant women in Fukui, Japan, who were concerned about COVID-19 infection, two weeks before expected delivery date.<br><br>Universal testing was carried out.                                                                                                    | Mothers were diagnosed by RT-PCRs on nasopharyngeal swabs.                                                                                                                                                                  |                                                                                                                                          |                                                                                                                                                                 |
| Pecks U, 2020 Germany  | Prospective cohort | 247 women<br><br>247 mothers with confirmed COVID-19 |     | All pregnant women with confirmed COVID-19 admitted to 1 of 65 clinics<br><br>It is unclear how testing was carried out.                                                                                                                                               | It is unclear how mothers were diagnosed.<br><br>Neonates were diagnosed by RT-PCR.                                                                                                                                         | COVID-related: COVID-specific mortality, Clinical Respiratory Syndrome, admission to ICU, invasive ventilation<br><br>Pregnancy-related: | Stillbirth, admission to neonatal unit, gestational age at delivery, respiratory distress syndrome                                                              |

|                           |                      |                                                   |      |                                                                                                                                                                                                                                                                                                                                 |                                                                                                                                             |                                                                                                  |                                                                                                                                                                                                                                     |                                                                                                                                                                       |
|---------------------------|----------------------|---------------------------------------------------|------|---------------------------------------------------------------------------------------------------------------------------------------------------------------------------------------------------------------------------------------------------------------------------------------------------------------------------------|---------------------------------------------------------------------------------------------------------------------------------------------|--------------------------------------------------------------------------------------------------|-------------------------------------------------------------------------------------------------------------------------------------------------------------------------------------------------------------------------------------|-----------------------------------------------------------------------------------------------------------------------------------------------------------------------|
|                           |                      |                                                   |      |                                                                                                                                                                                                                                                                                                                                 |                                                                                                                                             |                                                                                                  | Preterm and term delivery, mode of delivery – caesarean section and vaginal, induced abortion                                                                                                                                       |                                                                                                                                                                       |
| Sherer ML, 2020 USA       | Prospective cohort   | 33 women<br>22 mothers with confirmed COVID-19    | 33   | All pregnant women tested for COVID-19 prior to admission and delivery at one hospital.<br><br>It is unclear how testing was carried out.<br><br>2 groups:<br>1) Pregnant women with COVID-19<br>Pregnant women without COVID-19                                                                                                | It is unclear how mothers were diagnosed.<br><br>Neonates were diagnosed by SARS-CoV-2-specific antibody level testing in cord blood serum. | Age, ethnicity                                                                                   | Pregnancy-related: pregnancy-induced hypertension, gestational diabetes, chorioamnionitis, mode of delivery – caesarean section and vaginal, prelabour rupture of membranes at (or near) term                                       | Large-for-gestational age, small-for-gestational-age, admission to neonatal unit, gestational age at delivery, neonatal sepsis                                        |
| Sterbenc A, 2020 Slovenia | Retrospective cohort | 202 women<br>0 mothers with confirmed COVID-19    |      | All pregnant women tested for COVID-19 1 day prior to admission to one hospital.<br><br>Universal testing was carried out.                                                                                                                                                                                                      | Mothers were diagnosed by RT-PCR from nasopharyngeal swab.                                                                                  |                                                                                                  |                                                                                                                                                                                                                                     |                                                                                                                                                                       |
| Adhikari EH, 2020 USA     | Retrospective cohort | 3374 women<br>252 mothers with confirmed COVID-19 | 3334 | All pregnant women who were tested for COVID-19 and delivered.<br><br>Testing was carried out on all outpatients and inpatients with symptoms or who fulfilled specific criteria (contact with a confirmed or suspected case, incarceration or group home setting, homelessness, outside hospital transfers, or unknown results | Mothers were diagnosed by RT-PCR from nasal or nasopharyngeal specimens.                                                                    | Age, ethnicity, parity, BMI, gestational diabetes, diabetes, chronic hypertension, pre-eclampsia | COVID-related: all-cause mortality, oxygenation, pneumonia, invasive ventilation, non-invasive ventilation, admission to hospital, coagulopathy<br><br>Pregnancy-related: mode of delivery – caesarean section and vaginal, induced | Congenital malformation, stillbirth, small-for-gestational-age, gestational age at delivery, neonatal sepsis, Apgar Score at 5 minutes, respiratory distress syndrome |



|                          |                      |                                    |    |                                                                                                                                                 |                                                                       |                  |                                                                                                                                                                                                   |                                                                                                                                                                   |
|--------------------------|----------------------|------------------------------------|----|-------------------------------------------------------------------------------------------------------------------------------------------------|-----------------------------------------------------------------------|------------------|---------------------------------------------------------------------------------------------------------------------------------------------------------------------------------------------------|-------------------------------------------------------------------------------------------------------------------------------------------------------------------|
|                          |                      |                                    |    | from COVID-19 testing ordered from an outside clinic or facility). From 14 <sup>th</sup> May 2020 there was a universal testing approach.       |                                                                       |                  | abortion, induction of labour, gestational diabetes, pregnancy-induced hypertension, chorioamnionitis                                                                                             |                                                                                                                                                                   |
|                          |                      |                                    |    | 2 groups:<br>1) Pregnant women with COVID-19<br>Pregnant women without COVID-19                                                                 |                                                                       |                  |                                                                                                                                                                                                   |                                                                                                                                                                   |
| Contreras NB, 2020 Chile | Retrospective cohort | 657 women                          |    | All pregnant women who had a COVID-19 test prior to delivery at one hospital.                                                                   | Mothers were diagnosed by RT-PCR.                                     |                  | Pregnancy-related: induction of labour, mode of delivery – caesarean section and vaginal, pregnancy-induced hypertension, gestational diabetes, pre-labour rupture of membranes at (or near) term |                                                                                                                                                                   |
|                          |                      | 64 mothers with confirmed COVID-19 |    | Universal testing was carried out.                                                                                                              |                                                                       |                  |                                                                                                                                                                                                   |                                                                                                                                                                   |
|                          |                      |                                    |    | 2 groups:<br>1) Pregnant women with COVID-19<br>Pregnant women without COVID-19                                                                 |                                                                       |                  |                                                                                                                                                                                                   |                                                                                                                                                                   |
| Cornejo N, 2020 Chile    | Retrospective cohort | 72 women                           |    | All pregnant women who had a COVID-19 test that were admitted to one hospital for termination of pregnancy.                                     | Mothers were diagnosed with PCR testing from a nasopharyngeal sample. |                  |                                                                                                                                                                                                   |                                                                                                                                                                   |
|                          |                      | 5 mothers with confirmed COVID-19  |    | Universal testing was carried out.                                                                                                              |                                                                       |                  |                                                                                                                                                                                                   |                                                                                                                                                                   |
|                          |                      |                                    |    | 2 groups:<br>1) Pregnant women with COVID-19<br>Pregnant women without COVID-19                                                                 |                                                                       |                  |                                                                                                                                                                                                   |                                                                                                                                                                   |
| DeBolt CA, 2020 USA      | Retrospective cohort | 132 women                          | 22 | All pregnant and non-pregnant women between the ages of 18-50 years who were admitted to one of 5 institutions for severe or critical COVID-19. | Mothers were diagnosed by PCR testing.                                | Pregnancy status | COVID-related: all-cause mortality, respiratory failure, severe pneumonia, adult respiratory distress syndrome, invasive ventilation, non-invasive ventilation, oxygenation, admission to ICU,    | Gestational age at delivery, birth weight, stillbirth, neonatal death, respiratory distress syndrome, admission to neonatal unit, length of stay in neonatal unit |
|                          |                      | 38 mothers with confirmed COVID-19 |    | It is unclear how testing was carried out.                                                                                                      |                                                                       |                  |                                                                                                                                                                                                   |                                                                                                                                                                   |
|                          |                      |                                    |    | 2 groups:                                                                                                                                       |                                                                       |                  |                                                                                                                                                                                                   |                                                                                                                                                                   |

|                          |                      |                                                                                                     |     |                                                                                                                                                                                                                                                               |                                                                                                                                                                                  |                                                                                                            |                                                                                                                                                                                                                                                                                      |                                                                                     |
|--------------------------|----------------------|-----------------------------------------------------------------------------------------------------|-----|---------------------------------------------------------------------------------------------------------------------------------------------------------------------------------------------------------------------------------------------------------------|----------------------------------------------------------------------------------------------------------------------------------------------------------------------------------|------------------------------------------------------------------------------------------------------------|--------------------------------------------------------------------------------------------------------------------------------------------------------------------------------------------------------------------------------------------------------------------------------------|-------------------------------------------------------------------------------------|
|                          |                      |                                                                                                     |     | 1) Pregnant women with COVID-19<br>Non-pregnant women with COVID-19                                                                                                                                                                                           |                                                                                                                                                                                  |                                                                                                            | ICU length of stay, sepsis, septic shock, acute kidney injury, acute cardiac injury, coagulopathy<br><br>Pregnancy-related: mode of delivery – caesarean section and vaginal, preterm delivery, spontaneous preterm delivery, pregnancy-induced hypertension, postpartum haemorrhage |                                                                                     |
| Dotters-Katz S, 2020 USA | Retrospective cohort | 85 women<br><br>63 mothers with confirmed COVID-19                                                  |     | All pregnant women with COVID-19 or at high risk of disease who received prenatal care at one of three hospitals.<br><br>It is unclear how testing was carried out.<br><br>2 groups:<br>1) Pregnant women with COVID-19<br>2) Pregnant women without COVID-19 | It is unclear how mothers were diagnosed.                                                                                                                                        | Age, BMI, ethnicity, parity, chronic hypertension, diabetes, gestational age, fever, cough, breathlessness | COVID-related: severe pneumonia, admission to hospital<br><br>Pregnancy-related: mode of delivery – caesarean section and vaginal,                                                                                                                                                   | Foetal growth restriction post infection                                            |
| Hernandez OB, 2020 Chile | Prospective cohort   | 661 women<br><br>661 mothers with suspected or confirmed COVID-19<br><br>656 mothers with confirmed | 389 | All pregnant and post-partum women up to day 42 with COVID-19 from 23 hospitals.<br><br>Universal testing was carried out.<br><br>Women were excluded if they did not have confirmatory tests by serology, RT-PCR, or concordant imaging.                     | Mothers were diagnosed by RT-PCR and/or IgM and IgG serology, or chest imaging characteristic of COVID-pneumonia in symptomatic patients.<br><br>Neonates were diagnosed by PCR. |                                                                                                            | COVID-related: admission to hospital, severe pneumonia, admission to ICU<br><br>Pregnancy-related: preterm delivery, mode of delivery – caesarean section or vaginal, induced abortion                                                                                               | Gestational age at delivery, small-for-gestational age, birthweight, neonatal death |

COVID-19

|                        |                      |                                                     |     |                                                                                                                                                                                                                                                                                                             |                                                                                                                                                        |        |                                                                                                                                                                                                                                                                                                    |                                                                                                                            |
|------------------------|----------------------|-----------------------------------------------------|-----|-------------------------------------------------------------------------------------------------------------------------------------------------------------------------------------------------------------------------------------------------------------------------------------------------------------|--------------------------------------------------------------------------------------------------------------------------------------------------------|--------|----------------------------------------------------------------------------------------------------------------------------------------------------------------------------------------------------------------------------------------------------------------------------------------------------|----------------------------------------------------------------------------------------------------------------------------|
| Morales NM, 2020 Chile | Prospective cohort   | 409 women<br><br>72 mothers with confirmed COVID-19 |     | All pregnant women on a maternity ward with symptoms of COVID-19 or a history of close contact with an infected individual, or admitted to hospital for any reason.<br><br>Universal hospital testing, symptomatic testing and testing in patients with contact with infected individuals were carried out. | Mothers were diagnosed by PCR testing for SARS-CoV-2.<br><br>Neonates born to COVID-positive mothers were PCR tested at 12 and 24 hours post-delivery. |        | COVID-related: admission to ICU, ICU length of stay, invasive ventilation, oxygenation, all-cause mortality, pneumonia, acute kidney injury, coagulopathy, respiratory distress<br><br>Pregnancy-related: mode of delivery – caesarean section and vaginal, gestational diabetes, preterm delivery | Gestational age at delivery, birthweight, Apgar score at 1 minute and 5 minutes, small-for-gestational age, neonatal death |
| Vielma OS, 2020 Chile  | Retrospective cohort | 597 women<br><br>59 mothers with confirmed COVID-19 | 597 | All pregnant women who were admitted for delivery to one hospital who had been tested for COVID-19.<br><br>Universal and symptomatic testing was carried out.<br><br>Mothers with twin pregnancies and without a PCR test result were excluded.                                                             | Mothers were diagnosed by RT-PCR using a nasopharyngeal sample.                                                                                        | Parity | COVID-related: severe pneumonia, invasive ventilation, non-invasive ventilation,<br><br>Pregnancy-related: preterm delivery, mode of delivery – caesarean section and vaginal                                                                                                                      | Gestational age at delivery, Apgar score at 1 and 5 minutes, neonatal death                                                |

ROUND 17

|                          |                    |                                                                 |                                                                                                                            |                                                                                                                                                             |                                                                                                                                                                                                                                                                                                                                                                                           |                                                                                                                          |
|--------------------------|--------------------|-----------------------------------------------------------------|----------------------------------------------------------------------------------------------------------------------------|-------------------------------------------------------------------------------------------------------------------------------------------------------------|-------------------------------------------------------------------------------------------------------------------------------------------------------------------------------------------------------------------------------------------------------------------------------------------------------------------------------------------------------------------------------------------|--------------------------------------------------------------------------------------------------------------------------|
| Shmakov R, 2020 Russia   | Prospective cohort | 66 women<br>42<br><br>66 mothers with confirmed COVID-19        | All pregnant women with confirmed COVID-19 admitted to one hospital.<br><br>Universal testing was carried out.             | Mothers were diagnosed by RT-PCRs on nasopharyngeal swabs.<br><br>Neonates of COVID-positive mothers were diagnosed by RT-PCRs on nasopharyngeal swabs.     | COVID-related: all-cause mortality, oxygenation, invasive ventilation, non-invasive ventilation, severe pneumonia, admission to ITU, duration of viral shedding, acute kidney injury, hypoproteinaemia, acute hepatic failure<br><br>Pregnancy-related: preterm delivery, miscarriage, induced abortion, mode of delivery – caesarean section and vaginal, pregnancy-induced hypertension | Birthweight, gestational age at delivery, Apgar score at 1 minute and 5 minutes, neonatal death, congenital malformation |
| Saha MM, 2020 India      | Prospective cohort | 56 women<br><br>3 mothers with confirmed COVID-19               | All pregnant women admitted to the isolation ward of one hospital.<br><br>Testing was carried out on symptomatic patients. | Mothers were diagnosed by RT-PCRs on nasopharyngeal swabs.<br><br>Neonates of COVID-positive mothers were tested for COVID-19. Method of diagnosis unclear. | Pregnancy-related: mode of delivery – caesarean section and vaginal                                                                                                                                                                                                                                                                                                                       | Gestational age at delivery, birthweight, Apgar score                                                                    |
| McClymont E, 2020 Canada | Prospective cohort | 46 women<br><br>46 mothers with suspected or confirmed COVID-19 | All pregnant women with documented COVID-19.<br><br>It is unclear how testing was carried out.                             | Method of diagnosis is unclear.                                                                                                                             | COVID-related: admission to hospital, admission to ICU, invasive ventilation                                                                                                                                                                                                                                                                                                              |                                                                                                                          |

|                               |                    |                                                |    |                                                                                                                                                                                                          |                                                                                                                                                                                                      |                                                                                                                                                                                                                                                                     |                                                                                                                                       |
|-------------------------------|--------------------|------------------------------------------------|----|----------------------------------------------------------------------------------------------------------------------------------------------------------------------------------------------------------|------------------------------------------------------------------------------------------------------------------------------------------------------------------------------------------------------|---------------------------------------------------------------------------------------------------------------------------------------------------------------------------------------------------------------------------------------------------------------------|---------------------------------------------------------------------------------------------------------------------------------------|
| Chaudhary S, 2020 Pakistan    | Prospective cohort | 26 women<br>26 mothers with confirmed COVID-19 | 14 | All pregnant women with confirmed COVID-19 admitted to one ward at one hospital.<br><br>It is unclear how testing was carried out.<br><br>Women with suspected but not confirmed COVID-19 were excluded. | Mothers were diagnosed by RT-PCRs on nasopharyngeal swabs.<br><br>Neonates born to COVID-positive mothers were tested for COVID-19 with a nasopharyngeal swab. Exact method of diagnosis is unclear. | COVID-related:<br>severe pneumonia, COVID-specific mortality, invasive ventilation<br><br>Pregnancy-related:<br>mode of delivery – caesarean section and vaginal, miscarriage, spontaneous preterm delivery, postpartum haemorrhage, pregnancy-induced hypertension | Stillbirth, neonatal death, Apgar score at 1 minute and 5 minutes, admission to the neonatal unit, foetal distress, neonatal asphyxia |
| Fabre Estremera M, 2020 Spain | Prospective cohort | 169 women<br>7 mothers with confirmed COVID-19 |    | All pregnant women who were symptomatic in their third trimester or who were at 36 weeks gestation<br><br>Universal testing was carried out.                                                             | Mothers were diagnosed by IgG/IgM antibody testing for SARS-CoV-2                                                                                                                                    |                                                                                                                                                                                                                                                                     |                                                                                                                                       |
| Fan C (1), 2020 China         | Prospective cohort | 12 women<br>12 mothers with confirmed COVID-19 | 10 | All pregnant women who had recovered from COVID-19 prior to delivery in hospitals in Wuhan.<br><br>It is unclear how testing was carried out.                                                            | Mothers were diagnosed by RT-PCR on nasopharyngeal swab.<br><br>Neonates born to COVID-positive mothers were tested for COVID-19 using an RNA test on nasopharyngeal swab and umbilical cord blood.  | COVID-related:<br>Oxygenation, invasive ventilation, non-invasive ventilation<br><br>Pregnancy-related:<br>mode of delivery – caesarean section and vaginal, gestational diabetes, pregnancy-induced hypertension, induced abortion                                 | Gestational age at delivery, Apgar score at 1 minute and 5 minutes, birthweight, neonatal asphyxia, neonatal death                    |

|                          |                      |                                                        |     |                                                                                                                                                                                                                                                                                                |                                                                                                                                                     |                     |                                                                     |
|--------------------------|----------------------|--------------------------------------------------------|-----|------------------------------------------------------------------------------------------------------------------------------------------------------------------------------------------------------------------------------------------------------------------------------------------------|-----------------------------------------------------------------------------------------------------------------------------------------------------|---------------------|---------------------------------------------------------------------|
| Hamed E, 2020 Qatar      | Retrospective cohort | 21567 women<br><br>678 mothers with confirmed COVID-19 |     | All adult patients attending primary health care corporation with a documented diagnosis of SARS-CoV-2 infection and a documented RT-PCR swab result.<br><br>It is unclear how testing was carried out.<br><br>2 groups:<br>1) Pregnant women with COVID-19<br>Pregnant women without COVID-19 | Mothers were diagnosed by RT-PCR on nasopharyngeal swab.                                                                                            |                     |                                                                     |
| Khan MA, 2020 Pakistan   | Retrospective cohort | 66 women<br><br>66 mothers with confirmed COVID-19     | 67  | All pregnant women who tested positive for COVID-19 prior to delivery at one hospital.<br><br>Universal testing was carried out.                                                                                                                                                               | Method of diagnosis is unclear for the mothers.<br><br>Neonates born to COVID-positive mothers were tested for COVID-19 by nasopharyngeal swab PCR. |                     | Pregnancy-related: mode of delivery – caesarean section and vaginal |
| Igbinosa I (1), 2020 USA | Retrospective cohort | 961 women<br><br>24 mothers with confirmed COVID-19    |     | All pregnant women tested for SARS-CoV-2 at one hospital.<br><br>Universal and symptomatic testing was carried out.                                                                                                                                                                            | Method of diagnosis is unclear.                                                                                                                     | Symptoms, ethnicity | COVID-related: severe pneumonia, admission to ICU                   |
| Villalain C, 2020 Spain  | Retrospective cohort | 759 women<br><br>86 mothers with confirmed COVID-19    | 565 | Pregnant women with routine serological analysis at one hospital.<br><br>Testing was initially carried out on symptomatic patients presenting at antenatal visit or at the emergency room. Universal screening was started from 31 <sup>st</sup> March.                                        | Mothers were diagnosed by nasopharyngeal swabs when either presented with symptoms, had a scheduled caesarean section or labor induction, or        |                     |                                                                     |

|                                     |                      |                                                 |    |                                                                                                                                                                                                                            |                                                                                                                                                |                                                                                                            |                                                                           |
|-------------------------------------|----------------------|-------------------------------------------------|----|----------------------------------------------------------------------------------------------------------------------------------------------------------------------------------------------------------------------------|------------------------------------------------------------------------------------------------------------------------------------------------|------------------------------------------------------------------------------------------------------------|---------------------------------------------------------------------------|
|                                     |                      |                                                 |    | <p>4 groups</p> <p>1) Seronegative women</p> <p>2) Asymptomatic seropositive women</p> <p>3) Symptomatic seropositive women with no confirmative RT-PCR</p> <p>4) Symptomatic seropositive women with confirmed RT-PCR</p> | <p>were admitted to maternity.</p> <p>Newborns of mothers with either confirmed RT-PCR or symptoms were diagnosed by nasopharyngeal swabs.</p> |                                                                                                            |                                                                           |
| Ali A, 2020 China                   | Retrospective cohort | 11 women                                        | 11 | <p>Asymptomatic pregnant patients with confirmed COVID-19 admitted to one hospital with available laboratory results and who received a low dose CT chest scan.</p> <p>It is unclear how testing was carried out.</p>      | <p>Mothers were diagnosed by serology testing for SARS-CoV-2 IgG and IgM antibodies, RT-PCR with throat swab and CT scan interpretation.</p>   | <p>COVID-related: pneumonia</p> <p>Pregnancy-related: mode of delivery – caesarean section and vaginal</p> | <p>Gestational age at delivery, birthweight, Apgar score at 5 minutes</p> |
| Belokrinitskaya TE (1), 2020 Russia | Prospective cohort   | 2010 women                                      |    | <p>It is unclear how testing was carried out.</p>                                                                                                                                                                          | <p>Method of diagnosis is unclear.</p>                                                                                                         | <p>COVID-related: Severe pneumonia, admission to hospital, invasive ventilation, all-cause mortality</p>   | <p>Stillbirth, early neonatal death</p>                                   |
|                                     |                      | 11 mothers with suspected or confirmed COVID-19 |    |                                                                                                                                                                                                                            |                                                                                                                                                |                                                                                                            |                                                                           |
|                                     |                      | 3 mothers with confirmed COVID-19               |    |                                                                                                                                                                                                                            |                                                                                                                                                |                                                                                                            |                                                                           |

|                             |                      |                                                  |     |                                                                                                                                                                                                                      |                                                                                                                                                                                  |                                                                                                |                                                                                                                                                                                                                                                                                                                                                                              |                                                                                                                                                                                                                       |
|-----------------------------|----------------------|--------------------------------------------------|-----|----------------------------------------------------------------------------------------------------------------------------------------------------------------------------------------------------------------------|----------------------------------------------------------------------------------------------------------------------------------------------------------------------------------|------------------------------------------------------------------------------------------------|------------------------------------------------------------------------------------------------------------------------------------------------------------------------------------------------------------------------------------------------------------------------------------------------------------------------------------------------------------------------------|-----------------------------------------------------------------------------------------------------------------------------------------------------------------------------------------------------------------------|
| Hcini N, 2020 French Guiana | Prospective cohort   | 507 women<br>137 mothers with confirmed COVID-19 | 508 | All pregnant women admitted for delivery beyond 15 weeks gestation to one hospital.<br><br>Universal testing was carried out.<br><br>2 groups:<br>1) Pregnant women with COVID-19<br>Pregnant women without COVID-19 | Mothers were diagnosed by RT-PCR on nasopharyngeal swabs.<br><br>Neonates were tested for COVID-19 at birth and 24-48 hours post delivery using RT-PCRs on nasopharyngeal swabs. | Age, BMI, obesity, parity, chronic hypertension, diabetes, pre-eclampsia, gestational diabetes | COVID-related:<br>severe pneumonia, admission to ITU, all-cause mortality, oxygenation, non-invasive ventilation, invasive ventilation,<br><br>Pregnancy related:<br>postpartum haemorrhage, mode of delivery – caesarean section and vaginal, preterm delivery (spontaneous and induced), miscarriage, induced abortion, pregnancy-induced pretension, gestational diabetes | Birthweight, stillbirth, foetal distress, admission to neonatal unit, respiratory distress syndrome, Apgar score at 1 minute and 5 minutes, neonatal seizures, small-for-gestational age, gestational age at delivery |
| Molina EO, 2020 Spain       | Retrospective cohort | 20 women with confirmed COVID-19                 | 8   | All symptomatic pregnant women with confirmed COVID-19 who attended one hospital.<br><br>Symptomatic testing was carried out.                                                                                        | Mothers were diagnosed by serology for IgG/IgM SARS-CoV-2 antibodies or RT-PCR from nasopharyngeal swab.                                                                         | Any abnormal radiology                                                                         | COVID-related:<br>admission to hospital, admission to ITU, invasive ventilation, severe pneumonia, Acute Respiratory Distress Syndrome, oxygenation, coagulopathy<br><br>Pregnancy-related:<br>mode of delivery – caesarean section and vaginal, pregnancy-induced hypertension, postpartum haemorrhage                                                                      | Gestational age at delivery, birthweight, Apgar score at 1 minute and 5 minutes, neonatal death                                                                                                                       |



|                                 |                      |                                                      |     |                                                                                                                                                                                                                             |                                                                                                                                                                            |                                                                                                                       |                                                                                                                                                                                                                                                                                                                                                                                                                                                                 |                                                                                                                                             |
|---------------------------------|----------------------|------------------------------------------------------|-----|-----------------------------------------------------------------------------------------------------------------------------------------------------------------------------------------------------------------------------|----------------------------------------------------------------------------------------------------------------------------------------------------------------------------|-----------------------------------------------------------------------------------------------------------------------|-----------------------------------------------------------------------------------------------------------------------------------------------------------------------------------------------------------------------------------------------------------------------------------------------------------------------------------------------------------------------------------------------------------------------------------------------------------------|---------------------------------------------------------------------------------------------------------------------------------------------|
| Yombi JC, 2020 Belgium          | Prospective cohort   | 221 women<br><br>10 mothers with confirmed COVID-19  |     | All pregnant women admitted to the obstetric ward at one hospital.<br><br>Universal testing was carried out.                                                                                                                | Mothers were diagnosed by RT-PCR on nasopharyngeal swabs.                                                                                                                  |                                                                                                                       |                                                                                                                                                                                                                                                                                                                                                                                                                                                                 |                                                                                                                                             |
| Mahajan N (2), 2020 India       | Retrospective cohort | 879 women<br><br>879 mothers with confirmed COVID-19 | 643 | All pregnant women with COVID-19 admitted to one hospital.<br><br>It is unclear how testing was carried out.                                                                                                                | Mothers were diagnosed by RT-PCR on nasopharyngeal swabs.<br><br>Neonates born to mothers with COVID-19 were tested for COVID-19 with nasopharyngeal swabs taken at birth. | Multiple pregnancy                                                                                                    | COVID-related: acute hepatic failure, Acute Respiratory Distress Syndrome, respiratory failure, oxygenation, non-invasive ventilation, invasive ventilation, severe pneumonia, psychosis, admission to ITU, all-cause mortality<br><br>Pregnancy-related: mode of delivery – caesarean section and vaginal, preterm-premature rupture of membranes, miscarriage, pregnancy-induced hypertension, preterm delivery, postpartum haemorrhage, gestational diabetes | Admission to neonatal unit, Apgar Score at 1 minute and 5 minutes, stillbirth                                                               |
| Vouga M (2), multiple countries | Retrospective cohort | 926 women<br><br>926 mothers with confirmed COVID-19 | 731 | All pregnant women who tested positive for SARS-CoV-2 at multiple centres.<br><br>Symptomatic, universal and exposure-based testing was carried out at different centres.<br><br>2 groups:<br>1) Pregnant women with severe | Mothers were diagnosed by RT-PCR on nasopharyngeal swabs.<br><br>Neonates born to mothers with COVID-19 were tested for COVID-19 via nasopharyngeal                        | Age, ethnicity, parity, diabetes, gestational diabetes, pregnancy induced hypertension, chronic hypertension, obesity | COVID-related: admission to hospital, admission to ICU, all-cause mortality, severe pneumonia, oxygenation, non-invasive ventilation, invasive ventilation<br><br>Pregnancy-related: mode of delivery –                                                                                                                                                                                                                                                         | Admission to neonatal unit, gestational age at delivery, neonatal death, birthweight, stillbirth, respiratory distress syndrome, congenital |

|                                  |                      |                                    |    |                                                                                                                                         |                                                                                                                                        |                                                                                                                                                                                 |                                                                                                                                                                                                                          |
|----------------------------------|----------------------|------------------------------------|----|-----------------------------------------------------------------------------------------------------------------------------------------|----------------------------------------------------------------------------------------------------------------------------------------|---------------------------------------------------------------------------------------------------------------------------------------------------------------------------------|--------------------------------------------------------------------------------------------------------------------------------------------------------------------------------------------------------------------------|
|                                  |                      |                                    |    | adverse outcomes from COVID-19<br>2) Pregnant women with mild adverse outcomes from COVID-19                                            | swabs taken at birth and RT-PCR.                                                                                                       | caesarean section and vaginal, preterm delivery, gestational diabetes, miscarriage, pregnancy-induced hypertension, preterm-premature rupture of membranes, induction of labour | malformation, neonatal sepsis                                                                                                                                                                                            |
|                                  |                      |                                    |    | Women under 18 years of age or who did not consent to be part of the study were excluded.                                               |                                                                                                                                        |                                                                                                                                                                                 |                                                                                                                                                                                                                          |
| Savirón-Cornudella R, 2020 Spain | Retrospective cohort | 226 women                          |    | All pregnant women admitted for labour and delivery at one hospital.                                                                    | Mothers were diagnosed by RT-PCR on nasopharyngeal swabs and serology testing for SARS-CoV-2 IgG and IgM antibodies.                   | Pregnancy-related: mode of delivery – caesarean section and vaginal, induction of labour                                                                                        | Admission to neonatal unit, cord blood pH, gestational age at delivery, birthweight, Apgar score at 5 minutes                                                                                                            |
|                                  |                      | 24 mothers with confirmed COVID-19 |    | Universal testing was carried out.                                                                                                      | Neonates born to mothers with COVID-19 were tested for COVID-19 via RT-PCR.                                                            |                                                                                                                                                                                 |                                                                                                                                                                                                                          |
| Ronchi A, 2020 Italy             | Prospective cohort   | 61 women                           | 62 | All pregnant women with confirmed COVID-19 between the 14 days prior to delivery and first days after childbirth at one of six centers. | Mothers were diagnosed by RT-PCR on nasopharyngeal swabs.                                                                              | COVID-related: severe pneumonia, invasive ventilation, all-cause mortality, admission to ICU, coagulopathy                                                                      | Admission to neonatal the unit, gestational age at delivery, preterm delivery, Apgar score at 1 minute and 5 minutes, birthweight, small-for-gestational age, large-for-gestational age, neonatal death, foetal distress |
|                                  |                      | 61 mothers with confirmed COVID-19 |    | Symptomatic testing was carried out until 1 <sup>st</sup> April 2020 when testing was universal.                                        | Neonates born to mothers with COVID-19 were tested for COVID-19 via RT-PCR on nasopharyngeal swabs collected within 24 hours of birth. | Pregnancy-related: mode of delivery – caesarean section and vaginal, gestational diabetes                                                                                       |                                                                                                                                                                                                                          |

|                          |                      |                                                    |    |                                                                                                                                                                                                                                                                                                                                                              |                                                                                                                                                                                                                  |                                                                                                                                                                                                                                                                                          |                                                                                                                                                                                                                              |
|--------------------------|----------------------|----------------------------------------------------|----|--------------------------------------------------------------------------------------------------------------------------------------------------------------------------------------------------------------------------------------------------------------------------------------------------------------------------------------------------------------|------------------------------------------------------------------------------------------------------------------------------------------------------------------------------------------------------------------|------------------------------------------------------------------------------------------------------------------------------------------------------------------------------------------------------------------------------------------------------------------------------------------|------------------------------------------------------------------------------------------------------------------------------------------------------------------------------------------------------------------------------|
| Ogamba I, 2020 USA       | Retrospective cohort | 40 women<br><br>40 mothers with confirmed COVID-19 |    | All pregnant women over 18 years of age with confirmed COVID-19 who were evaluated in several units for 4 hospitals.<br><br>Universal testing was carried out.<br><br>Women without a documented positive lab result for COVID-19 were excluded.                                                                                                             | Mothers were diagnosed by RT-PCR on nasopharyngeal or nasal swabs.<br><br>It is unclear how neonates were diagnosed.                                                                                             | COVID-related: oxygenation, pneumonia, Acute Respiratory Distress Syndrome, admission to ICU, invasive ventilation<br><br>Pregnancy-related: pregnancy-induced hypertension, gestational diabetes, mode of delivery – caesarean section and vaginal, miscarriage, postpartum haemorrhage | Gestational age at delivery, Apgar score at 1 minute and 5 minutes, stillbirth, birthweight, preterm delivery                                                                                                                |
| Moreno SC, 2020 USA      | Retrospective cohort | 19 women<br><br>19 mothers with confirmed COVID-19 | 21 | Symptomatic pregnant women with confirmed COVID-19 diagnosed during the third trimester who delivered at one of two centers.<br><br>Symptomatic testing was carried out.<br><br>Mothers and neonates without COVID-19 test results, neonates born outside of the two hospitals and fetuses with suspected congenital anomalies were excluded from the study. | Mothers were diagnosed by RT-PCR on nasopharyngeal or nasal swabs.<br><br>Neonates born to mothers with COVID-19 were tested for COVID-19 via RT-PCR on nasopharyngeal swabs collected within 24 hours of birth. | COVID-related: admission to ICU, pneumonia, all-cause mortality, sepsis, oxygenation, invasive ventilation, non-invasive ventilation<br><br>Pregnancy-related: mode of delivery – caesarean section and vaginal, postpartum haemorrhage                                                  | Preterm delivery, admission to the neonatal unit, neonatal death, neonatal sepsis, gestational age at delivery, Apgar score at 1 minute and 5 minutes, birthweight, respiratory distress syndrome, necrotising enterocolitis |
| ROUND 18                 |                      |                                                    |    |                                                                                                                                                                                                                                                                                                                                                              |                                                                                                                                                                                                                  |                                                                                                                                                                                                                                                                                          |                                                                                                                                                                                                                              |
| Ciavarella A, 2020 Italy | Prospective cohort   | 69 women<br><br>21 mothers with confirmed COVID-19 |    | All pregnant women admitted to one hospital.<br><br>It is unclear how testing was carried out.<br><br>Women with known coagulation abnormalities, recent venous thromboembolism or                                                                                                                                                                           | Mothers were diagnosed by RT-PCRs on nasal swabs.                                                                                                                                                                |                                                                                                                                                                                                                                                                                          |                                                                                                                                                                                                                              |

|                      |                      |                                                      |  |                                                                                                                             |                                                                                                                                                                                                         |                                                                                                                                                                             |                                                                                                                                                                                                                                                                                                                                                                                                                                                              |
|----------------------|----------------------|------------------------------------------------------|--|-----------------------------------------------------------------------------------------------------------------------------|---------------------------------------------------------------------------------------------------------------------------------------------------------------------------------------------------------|-----------------------------------------------------------------------------------------------------------------------------------------------------------------------------|--------------------------------------------------------------------------------------------------------------------------------------------------------------------------------------------------------------------------------------------------------------------------------------------------------------------------------------------------------------------------------------------------------------------------------------------------------------|
|                      |                      |                                                      |  | obstetrical complication were excluded from the study.                                                                      |                                                                                                                                                                                                         |                                                                                                                                                                             |                                                                                                                                                                                                                                                                                                                                                                                                                                                              |
| ElHalik M, 2020 UAE  | Retrospective cohort | 35 women<br>36<br>35 mothers with confirmed COVID-19 |  | All pregnant women admitted for delivery at one hospital with confirmed COVID-19.<br><br>Universal testing was carried out. | Mothers were diagnosed by RT-PCRs on nasopharyngeal swabs.<br><br>Newborns from COVID-positive mothers were diagnosed by RT-PCR on nasopharyngeal swabs collected at birth and 24-48 hours after birth. |                                                                                                                                                                             | COVID-related: all-cause mortality<br><br>Pregnancy-related: mode of delivery – caesarean section and vaginal, pregnancy-induced hypertension, gestational diabetes, chorioamnionitis, preterm delivery<br><br>Gestational age at delivery, admission to the neonatal unit, birthweight, Apgar score at 1 minute and 5 minutes, small-for-gestational age, large-for-gestational age, Respiratory Distress Syndrome, neonatal death, congenital malformation |
| Erol SA, 2020 Turkey | Prospective cohort   | 96 women<br>60 mothers with confirmed COVID-19       |  | All pregnant women who were admitted to one hospital.<br><br>It is unclear how testing was carried out.                     | Mothers were diagnosed by RT-PCR on nasopharyngeal and oropharyngeal specimens.                                                                                                                         | Age, BMI, any comorbidity, obesity, chronic hypertension, asthma, diabetes, pre-eclampsia, gestational diabetes, pregnancy induced hypertension, lymphopaenia, abnormal LFT | COVID-related: severe pneumonia, coagulopathy, acute hepatic failure<br><br>Pregnancy-related: pregnancy-induced hypertension, preterm delivery, miscarriage, gestational diabetes                                                                                                                                                                                                                                                                           |

|                                       |                      |                                                             |     |                                                                                                                                                                                                                                                                       |                                                                                                                                                                                |                                                                     |                                                                                                                      |                                                                                                                                                                                               |
|---------------------------------------|----------------------|-------------------------------------------------------------|-----|-----------------------------------------------------------------------------------------------------------------------------------------------------------------------------------------------------------------------------------------------------------------------|--------------------------------------------------------------------------------------------------------------------------------------------------------------------------------|---------------------------------------------------------------------|----------------------------------------------------------------------------------------------------------------------|-----------------------------------------------------------------------------------------------------------------------------------------------------------------------------------------------|
| He Z, 2020 China                      | Retrospective cohort | 22 women<br>22 mothers with suspected or confirmed COVID-19 | 22  | All pregnant women admitted to one hospital with confirmed COVID-19.<br><br>China commission screening was carried out.                                                                                                                                               | Mothers were diagnosed by RT-PCR.<br><br>Neonates were diagnosed RT-PCR by cord blood and throat swab samples.                                                                 |                                                                     | COVID-related: oxygenation<br><br>Pregnancy-related: mode of delivery- caesarean section and vaginal                 | Gestational age at delivery, birthweight, Apgar score at 1 minute and 5 minutes, stillbirth, neonatal death, neonatal asphyxia                                                                |
| Martinez-Portilla RJ (1), 2020 Mexico | Prospective cohort   | 181091 women<br><br>5183 mothers with confirmed COVID-19    |     | All women of reproductive age (15-49 years) with confirmed COVID-19 admitted to one of 475 hospitals with suspected COVID-19.<br><br>Symptomatic screening was carried out.                                                                                           | Mothers were diagnosed by RT-PCR.                                                                                                                                              | COPD, asthma, smoking, chronic hypertension, obesity, diabetes, age | COVID-related: all-cause mortality, invasive ventilation, admission to ITU, pneumonia                                |                                                                                                                                                                                               |
| Tsatsaris V, 2020 France              | Prospective cohort   | 529 women<br><br>27 mothers with confirmed COVID-19         | 529 | All pregnant women admitted to the delivery ward of one hospital.<br><br>Universal testing was carried out.<br><br>Women under 18 years of age, those who did not consent to the study, and those who could not read or understand the study documents were excluded. | Mothers were diagnosed by ELISA serology testing for SARS-CoV-2 IgG antibodies.                                                                                                | Age                                                                 | Pregnancy-related: induced abortion, preterm delivery, mode of delivery: caesarean section and vaginal               | Gestational age at delivery, stillbirth, congenital malformation, neonatal death                                                                                                              |
| Aliaga CD, 2020 Peru                  | Retrospective cohort | 114 women<br><br>114 mothers with confirmed COVID-19        | 114 | All pregnant women with confirmed COVID-19 who delivered at one hospital.<br><br>Universal testing was carried out.                                                                                                                                                   | Mothers were diagnosed by serology testing for IgG and IgM SARS-CoV-2 antibodies.<br><br>Neonates of COVID-positive mothers were diagnosed by serology testing for IgG and IgM |                                                                     | Pregnancy-related: preterm delivery, mode of delivery: caesarean section and vaginal, pregnancy-induced hypertension | Neonatal death, Apgar score at 1 minute and 5 minutes, gestational age at delivery, birthweight, admission to neonatal unit, foetal distress, Respiratory Distress Syndrome, neonatal sepsis, |

|                     |                    |                                                     |     |                                                                                                                                                                                                                                                                                                                                                                                                                                               |                                                                                                                                                                                 |                                     |                                                                                                                                                                                                                                                                                                                                               |                                                                                                                                     |
|---------------------|--------------------|-----------------------------------------------------|-----|-----------------------------------------------------------------------------------------------------------------------------------------------------------------------------------------------------------------------------------------------------------------------------------------------------------------------------------------------------------------------------------------------------------------------------------------------|---------------------------------------------------------------------------------------------------------------------------------------------------------------------------------|-------------------------------------|-----------------------------------------------------------------------------------------------------------------------------------------------------------------------------------------------------------------------------------------------------------------------------------------------------------------------------------------------|-------------------------------------------------------------------------------------------------------------------------------------|
|                     |                    |                                                     |     |                                                                                                                                                                                                                                                                                                                                                                                                                                               | SARS-CoV-2 antibodies.                                                                                                                                                          |                                     |                                                                                                                                                                                                                                                                                                                                               | congenital malformation, neonatal asphyxia                                                                                          |
| Edlow AG, 2020 USA  | Prospective cohort | 127 women<br><br>64 mothers with confirmed COVID-19 | 120 | All pregnant women with confirmed COVID-19 attending one of three hospitals.<br><br>It is unclear how testing was carried out before April 27 <sup>th</sup> . Universal screening was carried out at all hospitals from 27 <sup>th</sup> April 2020.<br><br>2 groups:<br>1) Pregnant women with COVID-19<br>2) Pregnant women without COVID-19<br><br>Women under 18 years of age and those who did not consent were excluded from the study. | Mothers were diagnosed by RT-PCR on nasopharyngeal swabs.<br><br>Neonates of COVID-19-positive mothers were tested for COVID-19 by nasopharyngeal swab at 24 hours after birth. | Chronic hypertension, pre-eclampsia | COVID-related: severe pneumonia, admission to ITU, invasive ventilation, coagulopathy, Acute Respiratory Distress Syndrome,<br><br>Pregnancy-related: gestational diabetes, postpartum haemorrhage, pregnancy-induced hypertension, preterm delivery, mode of delivery: caesarean section and vaginal, preterm-premature rupture of membranes | Gestational age at delivery, Respiratory Distress Syndrome, admission to the neonatal unit, stillbirth, birthweight, neonatal death |
| Jenabi E, 2020 Iran | Prospective cohort | 90 women<br><br>90 mothers with confirmed COVID-19  | 90  | All singleton pregnant women with confirmed COVID-19 admitted for delivery to hospitals in one region.<br><br>It is unclear how testing was carried out.<br><br>2 groups:<br>1) Symptomatic pregnant women with COVID-19<br>2) Asymptomatic pregnant women with COVID-19                                                                                                                                                                      | Mothers were diagnosed by RT-PCR on nasopharyngeal swabs.                                                                                                                       | Age, pre-eclampsia, any symptoms    | COVID-related: admission to hospital<br><br>Pregnancy-related: pregnancy-induced hypertension, preterm delivery, mode of delivery: caesarean section and vaginal                                                                                                                                                                              | Birthweight, neonatal death, gestational age at delivery                                                                            |

|                                       |                    |                                                           |                                                                                                                                                                                                                                                                                               |                                                                                                                                 |                                                                                                                                                                                                                                             |                                                                                                                                           |
|---------------------------------------|--------------------|-----------------------------------------------------------|-----------------------------------------------------------------------------------------------------------------------------------------------------------------------------------------------------------------------------------------------------------------------------------------------|---------------------------------------------------------------------------------------------------------------------------------|---------------------------------------------------------------------------------------------------------------------------------------------------------------------------------------------------------------------------------------------|-------------------------------------------------------------------------------------------------------------------------------------------|
|                                       |                    |                                                           | Women with less than 3 symptoms were excluded from the study.                                                                                                                                                                                                                                 |                                                                                                                                 |                                                                                                                                                                                                                                             |                                                                                                                                           |
| Martinez-Portilla RJ (2), 2020 Mexico | Prospective cohort | 262,749 women<br><br>7028 mothers with confirmed COVID-19 | Pregnant women and non-pregnant women of reproductive age (15-45 years) with confirmed COVID-19 attending one of 475 hospitals.<br><br>It is unclear how testing was carried out.<br><br>2 groups:<br>1) Pregnant women with COVID-19<br>Non-pregnant women of reproductive age with COVID-19 | Mothers were diagnosed by RT-PCR.                                                                                               | COVID-related: all-cause mortality, pneumonia                                                                                                                                                                                               |                                                                                                                                           |
| Money D, 2020 Canada                  | Prospective cohort | 28902 women<br><br>430 mothers with confirmed COVID-19    | All pregnant women with confirmed COVID-19 in one of three provinces.<br><br>It is unclear how testing was carried out.                                                                                                                                                                       | Method of diagnosis unclear for mothers.<br><br>Neonates born to COVID-positive mothers were diagnosed by nasopharyngeal swabs. | COVID-related: admission to hospital, admission to ICU, invasive ventilation, oxygenation, coagulopathy, pneumonia, sepsis<br><br>Pregnancy-related: preterm delivery, mode of delivery: caesarean section and vaginal, induction of labour | Stillbirth, admission to the neonatal unit, gestational age at delivery, birthweight, Apgar score at 5 minutes, small-for-gestational age |

|                           |                      |                                     |     |                                                                                                                                                                                     |                                                                                                                                                            |                                                                                                                    |                                                                                                                                                                    |                                                                                                                                                                                                                                           |
|---------------------------|----------------------|-------------------------------------|-----|-------------------------------------------------------------------------------------------------------------------------------------------------------------------------------------|------------------------------------------------------------------------------------------------------------------------------------------------------------|--------------------------------------------------------------------------------------------------------------------|--------------------------------------------------------------------------------------------------------------------------------------------------------------------|-------------------------------------------------------------------------------------------------------------------------------------------------------------------------------------------------------------------------------------------|
| Nambiar S (2), 2020 India | Retrospective cohort | 158 women                           |     | All pregnant women with confirmed COVID-19 admitted to one hospital.                                                                                                                | Mothers were diagnosed by RT-PCR.                                                                                                                          |                                                                                                                    | COVID-related: admission to ICU                                                                                                                                    | Foetal distress                                                                                                                                                                                                                           |
|                           |                      | 158 mothers with confirmed COVID-19 |     | It is unclear how testing was carried out.                                                                                                                                          | Neonates born to COVID-positive mothers were diagnosed by nasopharyngeal swabs.                                                                            |                                                                                                                    | Pregnancy-related: mode of delivery: caesarean section and vaginal, miscarriage, gestational diabetes, pregnancy-induced hypertension                              |                                                                                                                                                                                                                                           |
| Yadav V, 2020 India       | Retrospective cohort | 140 women                           | 140 | All pregnant women with confirmed COVID-19 admitted to one hospital.                                                                                                                | Mothers were diagnosed by RT-PCR from nasopharyngeal and oral swabs.                                                                                       | Age, parity, gestational age, chronic hypertension, diabetes, gestational diabetes, pregnancy induced hypertension | COVID-related: severe pneumonia, oxygenation, invasive ventilation, all-cause mortality                                                                            | Gestational age at delivery, small-for-gestational age, Apgar score at 1 minute, birthweight, stillbirth, foetal distress, admission to the neonatal unit, Respiratory Distress Syndrome, neonatal death, length of stay in neonatal unit |
|                           |                      | 28 mothers with confirmed COVID-19  |     | Universal testing was carried out.                                                                                                                                                  |                                                                                                                                                            |                                                                                                                    | Pregnancy-related: preterm delivery, mode of delivery: caesarean section and vaginal, gestational diabetes, pregnancy-induced hypertension, antepartum haemorrhage |                                                                                                                                                                                                                                           |
| ROUND 19                  |                      |                                     |     |                                                                                                                                                                                     |                                                                                                                                                            |                                                                                                                    |                                                                                                                                                                    |                                                                                                                                                                                                                                           |
| Aliaga CD (1), 2020 Peru  | Retrospective cohort | 43 women                            | 43  | All women with COVID-19 and their newborns admitted to one hospital in Peru.                                                                                                        | Mothers were diagnosed by RT-PCR from nasal or pharyngeal swab. Mothers seen in emergency services were also diagnosed by serology testing for SARS-CoV-2. |                                                                                                                    | COVID-related: all-cause mortality                                                                                                                                 | Neonatal death, admission to NICU, neonatal sepsis, APGAR scores at 1 and 5 minutes, foetal distress, neonatal pneumonia, length of stay in neonatal unit, birthweight,                                                                   |
|                           |                      | 43 mothers with confirmed COVID-19  |     | Universal testing was carried out for women seen in emergency services. Testing was carried out on symptomatic patients with negative serology tests before delivery, and for those |                                                                                                                                                            |                                                                                                                    | Pregnancy-related: preterm delivery, mode of delivery – caesarean section and vaginal, prelabour rupture of membranes at (or near) term,                           |                                                                                                                                                                                                                                           |



|                          |                      |                                                                                                           |    |                                                                                                                                                                                                                                                                                                                                                                                                         |                                                                                                                                                                                                                                  |                                                                                                                                                                                                      |                                   |
|--------------------------|----------------------|-----------------------------------------------------------------------------------------------------------|----|---------------------------------------------------------------------------------------------------------------------------------------------------------------------------------------------------------------------------------------------------------------------------------------------------------------------------------------------------------------------------------------------------------|----------------------------------------------------------------------------------------------------------------------------------------------------------------------------------------------------------------------------------|------------------------------------------------------------------------------------------------------------------------------------------------------------------------------------------------------|-----------------------------------|
|                          |                      |                                                                                                           |    | with an epidemiological history of exposure.<br><br>Mothers without COVID-19 before delivery were excluded.                                                                                                                                                                                                                                                                                             | Newborns of pregnant mothers with COVID-19 were diagnosed by RT-PCR within first 12 hours of life                                                                                                                                |                                                                                                                                                                                                      | foetal growth restriction, DIC    |
| Aski SK, 2020<br>Iran    | Retrospective Cohort | 70 women<br><br>70 mothers with suspected or confirmed COVID-19<br><br>22 mothers with confirmed COVID-19 | 33 | All women with laboratory-confirmed and suspected COVID-19, with ability to communicate and answer questions, who delivered in hospitals in the Guilan province.<br><br>It is unclear how testing was carried out.<br><br>Mothers suspected of having other respiratory diseases such as Influenza A or B, respiratory syncytial virus, adenovirus, chlamydial pneumonia, and mycoplasma were excluded. | Laboratory-confirmed mothers were diagnosed by RT-PCR from nasopharyngeal swab.<br><br>Clinically diagnosed mothers were diagnosed by radiological findings in a positive CT scan.<br><br>Newborns were not tested for COVID-19. | COVID-related: all-cause mortality, pneumonia, invasive ventilation, admission to ICU, severe pneumonia<br><br>Pregnancy-related: preterm delivery, mode of delivery – caesarean section and vaginal | Neonatal death, admission to NICU |
| Barbhaiya M, 2020<br>USA | Prospective Cohort   | 61 women<br><br>5 mothers with suspected or confirmed COVID-19                                            |    | All women with laboratory-confirmed and suspected COVID-19 aged 18 – 50, with at least one visit with a rheumatologist at a specialist hospital in New York.<br><br>It is unclear how testing was carried out.<br><br>2 groups<br>1) Pregnant women with COVID-19<br>2) Non-pregnant women with COVID-19                                                                                                | Laboratory-confirmed mothers were diagnosed by RT-PCR from nasopharyngeal swab.<br><br>Clinically diagnosed mothers were diagnosed by a healthcare provider upon suspicion.                                                      | COVID-related: admission to hospital, invasive ventilation<br><br>Pregnancy-related: mode of delivery – caesarean section and vaginal                                                                |                                   |

|                               |                      |                                                                                                          |     |                                                                                                                                                                                                                                                                                     |                                                                                                             |                        |                                                                                                                                                                                                                                                                        |                                                                                                                             |
|-------------------------------|----------------------|----------------------------------------------------------------------------------------------------------|-----|-------------------------------------------------------------------------------------------------------------------------------------------------------------------------------------------------------------------------------------------------------------------------------------|-------------------------------------------------------------------------------------------------------------|------------------------|------------------------------------------------------------------------------------------------------------------------------------------------------------------------------------------------------------------------------------------------------------------------|-----------------------------------------------------------------------------------------------------------------------------|
| Carreras SU, 2020<br>Cuba     | Retrospective Cohort | 55 women<br><br>55 mothers with suspected or confirmed COVID-19<br><br>6 mothers with confirmed COVID-19 |     | All women with laboratory-confirmed and suspected COVID-19 admitted to one hospital.<br><br>It is unclear how testing was carried out.                                                                                                                                              | Method of diagnosis is unclear.                                                                             |                        |                                                                                                                                                                                                                                                                        |                                                                                                                             |
| Di Guardo F, 2020<br>Italy    | Retrospective Cohort | 145 women<br><br>145 mothers with confirmed COVID-19                                                     | 145 | All women with laboratory-confirmed COVID-19 admitted to two hospitals, with physiological pregnancies.<br><br>It is unclear how testing was carried out.<br><br>Women with monochorial, monoamniotic twin pregnancies and multiple pregnancies were excluded.                      | Mothers were diagnosed by RT-PCR from nasopharyngeal swab.                                                  |                        | COVID-related: all-cause mortality, pneumonia, ARDS, invasive ventilation, admission to ICU, ICU length of stay, acute kidney injury, time from illness onset to delivery<br><br>Pregnancy-related: preterm delivery, mode of delivery – caesarean section and vaginal | Neonatal death, neonatal sepsis, foetal distress, APGAR score (time unknown), DIC, birthweight, gestational age at delivery |
| Mattar CNZ, 2020<br>Singapore | Prospective Cohort   | 16 women<br><br>16 mothers with confirmed COVID-19                                                       | 5   | All women with laboratory-confirmed COVID-19 admitted to four COVID-19 centres in Singapore.<br><br>Testing was carried out for women with acute respiratory symptoms, contact with known COVID-19 cases, significant travel history, or those exposed to known community clusters. | Mothers were diagnosed by RT-PCR.<br><br>One newborn was diagnosed by RT-PCR of foetal nose, ear/mouth swab | Age, ethnicity, parity | COVID-related: all-cause mortality, pneumonia, severe pneumonia, admission to ICU, non-invasive ventilation, oxygenation, admission to hospital, time from illness onset to recovery<br><br>Pregnancy-related: mode of delivery –                                      | Neonatal death, gestational age at delivery, SGA, birthweight                                                               |

|                           |                    |                                                                  |     |                                                                                                                                                                                                                                                                                                                                                                                                                                                                                 |                                             |                                                                                   |                                                             |
|---------------------------|--------------------|------------------------------------------------------------------|-----|---------------------------------------------------------------------------------------------------------------------------------------------------------------------------------------------------------------------------------------------------------------------------------------------------------------------------------------------------------------------------------------------------------------------------------------------------------------------------------|---------------------------------------------|-----------------------------------------------------------------------------------|-------------------------------------------------------------|
|                           |                    |                                                                  |     |                                                                                                                                                                                                                                                                                                                                                                                                                                                                                 |                                             | caesarean section and vaginal, preterm delivery, miscarriage, induction of labour |                                                             |
| Mayopoulos G, 2020<br>USA | Prospective Cohort | 136 women<br><br>68 mothers with suspected or confirmed COVID-19 | 136 | All women who had given birth in the last six months and completed an anonymous survey shared through the hospital's research study platform, social media and postpartum professional communities.<br><br>It is unclear how testing was carried out.<br><br>2 groups<br>1) Pregnant women with suspected or confirmed COVID-19<br>2) Pregnant women without COVID-19 matched on demographic factors, primiparity, prior trauma and childbirth history, and prior mental health | Method of diagnosis is unclear.             | Pregnancy-related: mode of delivery – caesarean section and vaginal               | Admission to NICU, birthweight, gestational age at delivery |
| Okamura S, 2020<br>Japan  | Prospective Cohort | 1475 women<br><br>0 mothers with confirmed COVID-19              |     | All women at 37 or more weeks of gestation, or who experienced threatened labour at all maternity facilities in Himeji city.<br><br>Universal testing was carried out.                                                                                                                                                                                                                                                                                                          | Mothers were diagnosed by RT-PCR on saliva. |                                                                                   |                                                             |

|                                 |                    |                                                                                                                  |      |                                                                                                                                                                                                                                                                                                                                                                                              |                                                                                                                                                                                                                                                                             |                                                                                                                |                                                                                                                                                                                                                                                                                                                             |                                                                                                                                                                                                                             |
|---------------------------------|--------------------|------------------------------------------------------------------------------------------------------------------|------|----------------------------------------------------------------------------------------------------------------------------------------------------------------------------------------------------------------------------------------------------------------------------------------------------------------------------------------------------------------------------------------------|-----------------------------------------------------------------------------------------------------------------------------------------------------------------------------------------------------------------------------------------------------------------------------|----------------------------------------------------------------------------------------------------------------|-----------------------------------------------------------------------------------------------------------------------------------------------------------------------------------------------------------------------------------------------------------------------------------------------------------------------------|-----------------------------------------------------------------------------------------------------------------------------------------------------------------------------------------------------------------------------|
| Solis-Garcia G, 2020<br>Spain   | Prospective Cohort | 73 women<br><br>73 mothers with confirmed COVID-19                                                               | 75   | All women with laboratory-confirmed COVID-19 in one hospital.<br><br>Universal testing was carried out.                                                                                                                                                                                                                                                                                      | Mothers were diagnosed by RT-PCR from nasopharyngeal swab.<br><br>Newborns were diagnosed by RT-PCR                                                                                                                                                                         |                                                                                                                | COVID-related:<br>Admission to ICU, admission to hospital,<br><br>Pregnancy-related:<br>preterm delivery, mode of delivery – caesarean section and vaginal, gestational diabetes                                                                                                                                            | Neonatal death, admission to NICU, birthweight, gestational age at delivery, APGAR scores at 1 and 5 minutes, necrotising enterocolitis, hypoxic ischaemic encephalopathy, respiratory distress syndrome, neonatal asphyxia |
| Thiabaud A, 2020<br>Switzerland | Prospective Cohort | 35 women<br><br>35 mothers with confirmed COVID-19                                                               |      | All women with laboratory-confirmed COVID-19 who were hospitalised for more than 24 hours from 20 Swiss hospitals.<br><br>It is unclear how testing was carried out.                                                                                                                                                                                                                         | Mothers were diagnosed by RT-PCR.                                                                                                                                                                                                                                           |                                                                                                                | COVID-related: all-cause mortality, admission to ICU, admission to hospital                                                                                                                                                                                                                                                 |                                                                                                                                                                                                                             |
| Vousden N, 2021<br>UK           | Prospective Cohort | 1842 women<br><br>1148 mothers with suspected and confirmed COVID-19<br><br>1136 mothers with confirmed COVID-19 | 1722 | All women with laboratory-confirmed or suspected COVID-19 who were hospitalised for more than 24 hours or longer for any cause, or for any duration to give birth, in a consultant-led maternity unit in the UK.<br><br>It is unclear how testing was carried out. Some women were screened by universal testing.<br><br>2 groups<br>1) Women diagnosed with suspected or confirmed COVID-19 | Mothers were laboratory-confirmed if they were hospitalised during pregnancy or within two days of giving birth if they had a positive test during or within seven days of admission.<br><br>Mothers were clinically diagnosed if they were symptomatic and had evidence of | Age, obesity, ethnicity, asthma, chronic hypertension, diabetes, any comorbidity, parity, gestational diabetes | COVID-related:<br>admission to hospital, all-cause mortality, COVID-specific mortality, pneumonia, oxygenation, admission to ICU<br><br>Pregnancy-related:<br>preterm delivery, spontaneous preterm delivery, induced preterm delivery, mode of delivery – caesarean section and vaginal, gestational diabetes, miscarriage | Stillbirth, neonatal death, admission to NICU, gestational age at delivery                                                                                                                                                  |

|                       |                      |                                                     |                                                                                                                                                                       |                                                                                                                                                                  |
|-----------------------|----------------------|-----------------------------------------------------|-----------------------------------------------------------------------------------------------------------------------------------------------------------------------|------------------------------------------------------------------------------------------------------------------------------------------------------------------|
|                       |                      |                                                     | 2) Historical control (cohort where the two women giving birth prior to any women with hospitalized influenza from November 2017 to December 2018 were included).     | pneumonia on imaging typical of SARS-CoV-2.<br><br>Some newborns were diagnosed by SARS-CoV-2 RNA (at less than 12 hours of age or more than/equal to 12 hours). |
| Woods KL, 2020<br>USA | Retrospective cohort | 415 women<br><br>41 mothers with confirmed COVID-19 | All women presenting for active labour and scheduled C-section, or induction of labour at one hospital, and their newborns.<br><br>Universal testing was carried out. | Mothers were diagnosed by RT-PCR of nasopharyngeal swab.<br><br>Newborns were diagnosed by RT-PCR.                                                               |

---

ROUND 20

|                                                                                                                                                                                |                      |                                                    |                                                                                                                                                                                   |                                     |                                     |
|--------------------------------------------------------------------------------------------------------------------------------------------------------------------------------|----------------------|----------------------------------------------------|-----------------------------------------------------------------------------------------------------------------------------------------------------------------------------------|-------------------------------------|-------------------------------------|
| Barbaro RP, 2020<br>Belgium/Brazil/Canada/<br>Columbia/Denmark/Germany/<br>Ireland/Italy/Kuwait/<br>Netherlands/Poland/Qatar/<br>South Korea/Singapore/Spain/<br>UK/US/Vietnam | Retrospective Cohort | 22 women<br><br>22 mothers with confirmed COVID-19 | All women with COVID-19, aged 16 years or older, who had ECMO support initiated as recorded in the ELSO international registry.<br><br>It is unclear how testing was carried out. | The method of diagnosis is unclear. | COVID-related:<br>ARDS, oxygenation |
|--------------------------------------------------------------------------------------------------------------------------------------------------------------------------------|----------------------|----------------------------------------------------|-----------------------------------------------------------------------------------------------------------------------------------------------------------------------------------|-------------------------------------|-------------------------------------|

|                                                                                         |                      |                                                                                                                |      |                                                                                                                                                                                                                                                                                                                          |                                                                                                                                                                                                                         |                                                                                                                                                                                                                                                            |                                                                                                                               |
|-----------------------------------------------------------------------------------------|----------------------|----------------------------------------------------------------------------------------------------------------|------|--------------------------------------------------------------------------------------------------------------------------------------------------------------------------------------------------------------------------------------------------------------------------------------------------------------------------|-------------------------------------------------------------------------------------------------------------------------------------------------------------------------------------------------------------------------|------------------------------------------------------------------------------------------------------------------------------------------------------------------------------------------------------------------------------------------------------------|-------------------------------------------------------------------------------------------------------------------------------|
| Camelo IY, 2020<br>USA                                                                  | Retrospective Cohort | 36 women<br><br>36 mothers with confirmed COVID-19                                                             | 32   | All women with COVID-19 at one hospital and their newborns.<br><br>It is unclear how testing was carried out.                                                                                                                                                                                                            | Mothers were diagnosed by RT-PCR of nasopharyngeal swab.<br><br>Newborns were diagnosed by RT-PCR of nasopharyngeal swab at 24 hours, 48 hours and day 5 of life.                                                       | COVID-related:<br>invasive ventilation, non-invasive ventilation, oxygenation<br><br>Pregnancy-related:<br>preterm delivery, mode of delivery – caesarean section and vaginal, induction of labour, gestational diabetes, pregnancy-induced hypertension   |                                                                                                                               |
| Fashner J, 2020<br>USA                                                                  | Prospective Cohort   | 9 women<br><br>9 mothers with confirmed COVID-19                                                               | 9    | All women admitted with COVID-19 in the US, on the claims-based HCA healthcare electronic data repository, and their newborns.<br><br>It is unclear how testing was carried out.                                                                                                                                         | The method of diagnosis is unclear.                                                                                                                                                                                     | COVID-related:<br>Admission to hospital,<br><br>Pregnancy-related:<br>mode of delivery – caesarean section and vaginal, preterm delivery                                                                                                                   | Gestational age at delivery, birthweight, admission to NICU, APGAR scores at 1 and 5 minutes, length of stay in neonatal unit |
| Mullins E (1), 2021<br>UK/Italy/China<br>Greece/Indonesia/India<br><br><b>PAN-COVID</b> | Prospective Cohort   | 1606 women<br><br>1606 mothers with suspected or confirmed COVID-19<br><br>651 mothers with confirmed COVID-19 | 1578 | All women with suspected or confirmed COVID-19 on the PAN-COVID international disease registry.<br><br>It is unclear how testing was carried out.<br><br>2 case groups:<br>1) Symptomatic women with confirmed or putative COVID-19 and asymptomatic women with positive swab tests<br>2) Women with positive swab tests | Mothers were laboratory-confirmed by a positive swab test.<br><br>Mothers were clinically diagnosed by the healthcare professional on basis of reported symptoms.<br><br>Newborns were diagnosed by positive swab test. | COVID-related: all-cause mortality<br><br>Pregnancy-related:<br>mode of delivery – caesarean section and vaginal, preterm delivery, spontaneous preterm delivery, induced preterm birth, miscarriage, gestational diabetes, pregnancy-induced hypertension | Stillbirth, neonatal death, birthweight, SGA, gestational age at delivery, LGA                                                |

|                                                                                         |                      |                                                        |      |                                                                                                                                                                                                                                                                                                                                                                              |                                                                                                                                                                                      |                                     |                                                                                                                                                                                                                                              |                                                                                                   |
|-----------------------------------------------------------------------------------------|----------------------|--------------------------------------------------------|------|------------------------------------------------------------------------------------------------------------------------------------------------------------------------------------------------------------------------------------------------------------------------------------------------------------------------------------------------------------------------------|--------------------------------------------------------------------------------------------------------------------------------------------------------------------------------------|-------------------------------------|----------------------------------------------------------------------------------------------------------------------------------------------------------------------------------------------------------------------------------------------|---------------------------------------------------------------------------------------------------|
| Mullins E (1), 2021<br>USA<br><br><b>AAP SONPM National Perinatal COVID-19 Registry</b> | Prospective Cohort   | 2398 women<br><br>2398 mothers with confirmed COVID-19 | 2439 | All women with COVID-19 from 14 days before delivery to 3 days after delivery on the AAP SONPM National Perinatal COVID-19 registry.<br><br>It is unclear how testing was carried out.                                                                                                                                                                                       | Method of diagnosis is unclear.                                                                                                                                                      |                                     | COVID-related: all-cause mortality<br><br>Pregnancy-related: mode of delivery – caesarean section and vaginal, preterm delivery, spontaneous preterm delivery, induced preterm birth, miscarriage                                            | Stillbirth, neonatal death, birthweight, SGA, gestational age at delivery, LGA                    |
| Rahman R, 2020<br>Bangladesh                                                            | Prospective Cohort   | 40 women<br><br>20 mothers with confirmed COVID-19     | 32   | Primigravid singleton pregnant women of all trimesters aged between 18 to 40 at one hospital in Dhaka.<br><br>It is unclear how testing was carried out.<br><br>2 groups:<br>1) Women with COVID-19<br>2) Women without COVID-19<br><br>Women with multiple pregnancy, pregnancy with hypertension, heart disease, renal disease, and other metabolic disease were excluded. | Mothers were diagnosed by RT-PCR.                                                                                                                                                    | Age, gestational age, pre-eclampsia | COVID-related: secondary infection<br><br>Pregnancy-related: preterm delivery, mode of delivery – caesarean section and vaginal, postpartum haemorrhage, induced abortion, prelabour rupture of membranes at (or near) term, wound infection | Stillbirth                                                                                        |
| Romano-Keeler J, 2021<br>USA                                                            | Retrospective Cohort | 21 women<br><br>21 mothers with confirmed COVID-19     | 21   | All women with COVID-19 and their newborns at a hospital.<br><br>It is unclear how testing was carried out.                                                                                                                                                                                                                                                                  | Mothers were diagnosed by COVID-19 antigen detection through rapid point of care testing within 72 hours of delivery or as an inpatient. Two mothers were diagnosed by viral RT-PCR. |                                     | COVID-related: invasive ventilation, non-invasive ventilation, oxygenation<br><br>Pregnancy-related: mode of delivery – caesarean section and vaginal, preterm delivery, prelabour rupture of                                                | Admission to NICU, birthweight, APGAR scores at 1 and 5 minutes, length of stay in neonatal unit, |

|                                                       |                      |                                                        |     |                                                                                                                                                                                                                                                                                                                                 |                                                                                    |      |                                                                                                                                                                                                                                                                                                                 |                                                                                                                                                          |
|-------------------------------------------------------|----------------------|--------------------------------------------------------|-----|---------------------------------------------------------------------------------------------------------------------------------------------------------------------------------------------------------------------------------------------------------------------------------------------------------------------------------|------------------------------------------------------------------------------------|------|-----------------------------------------------------------------------------------------------------------------------------------------------------------------------------------------------------------------------------------------------------------------------------------------------------------------|----------------------------------------------------------------------------------------------------------------------------------------------------------|
|                                                       |                      |                                                        |     |                                                                                                                                                                                                                                                                                                                                 | Newborns were diagnosed by rapid point of care testing at 24 and 48 hours of life. |      | membranes at (or near) term                                                                                                                                                                                                                                                                                     |                                                                                                                                                          |
| Brazilian Ministry of Health (3), 2020<br>Brazil      | Retrospective Cohort | 330 women<br><br>330 mothers with confirmed COVID-19   |     | All pregnant women hospitalised in Brazilian hospitals with confirmed COVID-19 captured in the Brazilian Health Surveillance.<br><br>Is it unclear how testing was carried out.                                                                                                                                                 | The method of diagnosis is unclear.                                                |      | COVID-related: all-cause mortality, admission to ICU, admission to hospital                                                                                                                                                                                                                                     |                                                                                                                                                          |
| CDC 25 <sup>th</sup> January 2021 Update, 2021<br>USA | Retrospective Cohort | 61911 women<br><br>61911 women with confirmed COVID-19 |     | All pregnant women with COVID-19 in the US.<br><br>It is unclear how testing was carried out.<br><br>Women under the age of 9 and above the age of 54 are excluded.                                                                                                                                                             | The method of diagnosis is unclear.                                                |      | COVID-related: all-cause mortality, invasive ventilation, oxygenation, admission to ICU, admission to hospital,                                                                                                                                                                                                 |                                                                                                                                                          |
| Cruz-Lemini M, 2021<br>Spain                          | Prospective Cohort   | 11728 women<br><br>279 mothers with confirmed COVID-19 | 597 | All asymptomatic women detected by screening for SARS-CoV-2 infection at admission to the delivery ward.<br><br>Universal testing was carried out.<br><br>2 groups:<br>1) Pregnant women with COVID-19<br>2) Pregnant women without COVID-19<br><br>Women with symptoms during the antenatal period, at delivery, or during the | Mothers were diagnosed by double-sampling PCR of nasopharyngeal swab.              | COPD | COVID-related: all-cause mortality, invasive ventilation, admission to ICU<br><br>Pregnancy-related: preterm delivery, preterm-premature rupture of membranes, mode of delivery – caesarean section and vaginal, postpartum haemorrhage, induction of labour, prelabour rupture of membranes at (or near) term, | Stillbirth, admission to NICU, gestational age at delivery, birthweight, APGAR scores at 1 and 5 minutes, cord blood pH, length of stay in neonatal unit |



|                                    |                      |                                                        |    |                                                                                                                                                                                                                                                                                                                                                                                                                                                                             |                                                                                                                                                |                                 |                                                                                                                                                                                                                                                                                                                                                                                                                                                              |
|------------------------------------|----------------------|--------------------------------------------------------|----|-----------------------------------------------------------------------------------------------------------------------------------------------------------------------------------------------------------------------------------------------------------------------------------------------------------------------------------------------------------------------------------------------------------------------------------------------------------------------------|------------------------------------------------------------------------------------------------------------------------------------------------|---------------------------------|--------------------------------------------------------------------------------------------------------------------------------------------------------------------------------------------------------------------------------------------------------------------------------------------------------------------------------------------------------------------------------------------------------------------------------------------------------------|
|                                    |                      |                                                        |    | postpartum six-week follow-up are excluded.                                                                                                                                                                                                                                                                                                                                                                                                                                 |                                                                                                                                                |                                 | pregnancy-induced hypertension                                                                                                                                                                                                                                                                                                                                                                                                                               |
| de la Cruz Conty ML, 2021<br>Spain | Prospective Cohort   | 1150 women<br><br>1150 mothers with confirmed COVID-19 |    | All women detected by screening for SARS-CoV-2 infection at admission in the delivery ward, or by testing suspicious cases that came into hospital due to COVID-19 symptoms, with known influenza and Tdap vaccination status.<br><br>Universal testing was carried out.<br><br>4 case groups:<br>1) Asymptomatic women<br>2) Women with mild-moderate symptoms<br>3) Women with pneumonia<br>4) Women with complicated pneumonia<br><br>Universal testing was carried out. | Mothers were diagnosed by double-sampling PCR of nasopharyngeal swab.                                                                          | Ethnicity, parity, COPD, asthma | COVID-related:<br>pneumonia, admission to ICU, invasive ventilation, septic shock<br><br>Pregnancy-related:<br>preterm delivery                                                                                                                                                                                                                                                                                                                              |
| Guo Y, 2021<br>China               | Retrospective Cohort | 20 women<br><br>20 mothers with COVID-19               | 17 | All pregnant and postpartum women diagnosed with COVID-19 admitted to two hospitals.<br><br>It is unclear how testing was carried out.                                                                                                                                                                                                                                                                                                                                      | Followed diagnostic criteria according to National Health Commission of China.<br><br>Mothers were diagnosed by RT-PCR of nasopharyngeal swab. | Age, parity                     | COVID-related: all-cause mortality, admission to ICU, oxygenation, admission to hospital<br><br>Pregnancy-related:<br>preterm delivery, spontaneous preterm delivery, preterm-premature rupture of membranes, mode of delivery – caesarean section and vaginal,<br><br>Stillbirth, neonatal death, admission to NICU, APGAR scores at 1 and 5 minutes, foetal distress, congenital malformation, birthweight, neonatal asphyxia, gestational age at delivery |

|                                                     |                      |                                                      |    |                                                                                                                                                                                                                                                                                                                                                   |                                                                                            |                                                                                                                                       |                                                                                                                                                                                                     |
|-----------------------------------------------------|----------------------|------------------------------------------------------|----|---------------------------------------------------------------------------------------------------------------------------------------------------------------------------------------------------------------------------------------------------------------------------------------------------------------------------------------------------|--------------------------------------------------------------------------------------------|---------------------------------------------------------------------------------------------------------------------------------------|-----------------------------------------------------------------------------------------------------------------------------------------------------------------------------------------------------|
|                                                     |                      |                                                      |    |                                                                                                                                                                                                                                                                                                                                                   | Newborns were diagnosed by RT-PCR of nasopharyngeal swab upon delivery and 3 days of life. |                                                                                                                                       | gestational diabetes, miscarriage, induced abortion                                                                                                                                                 |
| Handley SC, 2021 USA                                | Retrospective Cohort | 86 women<br>86 mothers with confirmed COVID-19       | 86 | All women with COVID-19 in 2 hospitals in Philadelphia.<br><br>Universal testing was carried out.                                                                                                                                                                                                                                                 | The method of diagnosis is unclear.                                                        |                                                                                                                                       | Pregnancy-related: preterm delivery, spontaneous preterm delivery, induced preterm birth<br><br>Stillbirth                                                                                          |
| ICNARC 8 <sup>th</sup> January 2021 Update, 2021 UK | Prospective Cohort   | 112 women<br>112 mothers with confirmed COVID-19     |    | All critically ill women with COVID-19 admitted to any critical care unit in the UK.<br><br>It is unclear how testing was carried out.<br><br>2 case groups:<br>1) Women admitted from 1 Sep<br>2) Women admitted up to 31 Aug<br><br>Women in adult critical care units in Scotland, paediatric and neonatal intensive care units were excluded. | The method of diagnosis is unclear.                                                        |                                                                                                                                       | COVID-related: Invasive ventilation, acute kidney injury, oxygenation, non-invasive ventilation                                                                                                     |
| Jering KS, 2021 USA                                 | Retrospective Cohort | 406446 women<br>6380 mothers with confirmed COVID-19 |    | All women giving birth and discharged on the Premier Healthcare Database in the US.<br><br>It is unclear how testing was carried out.<br><br>2 groups:<br>1) Women with COVID-19                                                                                                                                                                  | The method of diagnosis is unclear.                                                        | Age, ethnicity, obesity, chronic hypertension, pregnancy induced hypertension, diabetes, gestational diabetes, smoking, pre-eclampsia | COVID-related: all-cause mortality, invasive ventilation, admission to ICU, acute kidney injury, acute hepatic failure, acute cardiac injury, admission to hospital, coagulopathy<br><br>Stillbirth |

|                                                                      |                    |                                                                        |     |                                                                                                                                                                                                                                         |                                     |                                                                                                                                                                                                                                                                                                           |                                                                                                           |
|----------------------------------------------------------------------|--------------------|------------------------------------------------------------------------|-----|-----------------------------------------------------------------------------------------------------------------------------------------------------------------------------------------------------------------------------------------|-------------------------------------|-----------------------------------------------------------------------------------------------------------------------------------------------------------------------------------------------------------------------------------------------------------------------------------------------------------|-----------------------------------------------------------------------------------------------------------|
|                                                                      |                    |                                                                        |     | 2) Women without COVID-19                                                                                                                                                                                                               |                                     | Pregnancy-related: preterm delivery, mode of delivery – caesarean section and vaginal, pregnancy-induced hypertension, gestational diabetes                                                                                                                                                               |                                                                                                           |
| Money D (1), 2020<br>Canada                                          | Prospective Cohort | 49864<br>women<br><br>1271<br>mothers<br>with<br>confirmed<br>COVID-19 |     | All pregnant women from three provinces registered to the CANCOVID-Preg project in Canada.<br><br>It is unclear how testing was carried out.<br><br>2 groups:<br>1) Pregnant women with COVID-19<br>2) Non-pregnant women with COVID-19 | Mothers were diagnosed by RT-PCR.   | COVID-related: Invasive ventilation, oxygenation, admission to ICU, admission to hospital, coagulopathy, sepsis<br><br>Pregnancy-related: preterm delivery, spontaneous preterm delivery, mode of delivery – caesarean section and vaginal, induction of labour, induced preterm birth                    | Stillbirth, admission to NICU, abnormal APGAR at 5 minutes, gestational age at delivery, birthweight, SGA |
| NethOSS 22 <sup>nd</sup> January 2021<br>Update, 2021<br>Netherlands | Prospective Cohort | 4634<br>women<br><br>4634<br>mothers<br>with<br>confirmed<br>COVID-19  | 866 | All COVID-19 positive women registered in the Netherlands.<br><br>It is unclear how testing was carried out.                                                                                                                            | The method of diagnosis is unclear. | COVID-related: all-cause mortality, pneumonia, invasive ventilation, admission to ICU, admission to hospital, oxygenation, non-invasive ventilation<br><br>Pregnancy-related: preterm delivery, mode of delivery – caesarean section and vaginal, miscarriage, induced preterm birth, induction of labour | Stillbirth, neonatal death, admission to NICU, foetal distress                                            |

|                                     |                      |                                                                      |  |                                                                                                                                                                                                                                                                                                                                                             |                                                                                                                                  |                                                                                                                                                                                                                                                                           |                                                                               |
|-------------------------------------|----------------------|----------------------------------------------------------------------|--|-------------------------------------------------------------------------------------------------------------------------------------------------------------------------------------------------------------------------------------------------------------------------------------------------------------------------------------------------------------|----------------------------------------------------------------------------------------------------------------------------------|---------------------------------------------------------------------------------------------------------------------------------------------------------------------------------------------------------------------------------------------------------------------------|-------------------------------------------------------------------------------|
| Qeadan F, 2021<br>USA               | Retrospective Cohort | 22493 women<br><br>1609 mothers with suspected or confirmed COVID-19 |  | All women aged 18 to 44 registered on Cerner COVID-19 database, with a diagnosis code of possible exposure or infection of COVID-19, or positive lab result for possible COVID-19 testing.<br><br>It is unclear how testing was carried out.<br><br>2 groups:<br>1) Pregnant women with confirmed COVID-19<br>2) Non-pregnant women with confirmed COVID-19 | The method of diagnosis is unclear.                                                                                              | COVID-related: all-cause mortality, invasive ventilation, admission to hospital, non-invasive ventilation<br><br>Pregnancy-related: gestational diabetes                                                                                                                  |                                                                               |
| Rottenstreich A (1), 2021<br>Israel | Prospective Cohort   | 1326 women<br><br>9 mothers with confirmed COVID-19                  |  | All asymptomatic women admitted for delivery in one hospital.<br><br>Universal testing was carried out.                                                                                                                                                                                                                                                     | Mothers were diagnosed by RT-PCR.                                                                                                |                                                                                                                                                                                                                                                                           |                                                                               |
| Sayeed SK, 2021<br>Bangladesh       | Prospective Cohort   | 68 women 51<br><br>68 mothers with confirmed COVID-19                |  | All women with symptoms suggestive of COVID-19 admitted to one hospital.<br><br>Testing was carried out on symptomatic patients.                                                                                                                                                                                                                            | Mothers were diagnosed by RT-PCR.<br><br>Most newborns were diagnosed by RT-PCR by nasopharynx swab within 24 hours of delivery. | COVID-related: all-cause mortality, pneumonia, time of illness onset to recovery, sepsis, severe pneumonia,<br><br>Pregnancy-related: preterm delivery, mode of delivery - caesarean section and vaginal, postpartum haemorrhage, induced abortion, gestational diabetes, | Foetal distress, gestational age at delivery, birthweight, neonatal pneumonia |
| ROUND 21                            |                      |                                                                      |  |                                                                                                                                                                                                                                                                                                                                                             |                                                                                                                                  |                                                                                                                                                                                                                                                                           |                                                                               |

|                           |                      |                                                                 |    |                                                                                                                                                                                                                                   |                                                 |                                                                                          |                                                                                                                                                                                    |                                      |
|---------------------------|----------------------|-----------------------------------------------------------------|----|-----------------------------------------------------------------------------------------------------------------------------------------------------------------------------------------------------------------------------------|-------------------------------------------------|------------------------------------------------------------------------------------------|------------------------------------------------------------------------------------------------------------------------------------------------------------------------------------|--------------------------------------|
| Akram E, 2021<br>Iraq     | Retrospective cohort | 100 women<br><br>100 mothers with confirmed COVID-19            |    | All pregnant women with COVID-19 admitted to Kirkuk Gynecology and children hospital.<br><br>It is unclear how testing was carried out.                                                                                           | Mothers were diagnosed by RT-PCRs.              |                                                                                          |                                                                                                                                                                                    | Pregnancy related: pre-term delivery |
| Araji S, 2021<br>USA      | Prospective cohort   | 15 women<br><br>15 mothers with suspected or confirmed COVID-19 |    | All pregnant women admitted to a COVID-ICU.<br><br>It is unclear how testing was carried out.                                                                                                                                     | Method of diagnosis is unclear.                 |                                                                                          |                                                                                                                                                                                    |                                      |
| Arakaki T, 2021<br>Japan  | Retrospective cohort | 7498 women<br><br>72 mothers with confirmed COVID-19            | 12 | All pregnant women admitted to delivery institutions in Japan with COVID-19.<br><br>Both universal and symptomatic testing were carried out.<br><br>2 groups<br>1) Symptomatic<br>2) Asymptomatic                                 | Mothers and newborns were diagnosed by RT-PCRs. | Age, 3 <sup>rd</sup> trimester, gestational diabetes, pre-eclampsia, asthma, any symptom | COVID-related: all-cause mortality, pneumonia, invasive ventilation, admission to ICU<br><br>Pregnancy related: preterm delivery, mode of delivery – caesarean section and vaginal | Apgar scores at 5 minutes            |
| Artymuk N, 2021<br>Russia | Retrospective cohort | 143010 women<br><br>8485 mothers with confirmed COVID-19        |    | All pregnant and women diagnosed with COVID-19 who were followed-up and reported by specialists in obstetrics and gynaecology in far Eastern and the Siberian Federal District.<br><br>It is unclear how testing was carried out. | Mothers were diagnosed by RT-PCRs.              |                                                                                          |                                                                                                                                                                                    |                                      |

|                                  |                      |                                                 |    |                                                                                                                                                                                                                                                   |                                                                                                                  |                                                             |                                                                     |
|----------------------------------|----------------------|-------------------------------------------------|----|---------------------------------------------------------------------------------------------------------------------------------------------------------------------------------------------------------------------------------------------------|------------------------------------------------------------------------------------------------------------------|-------------------------------------------------------------|---------------------------------------------------------------------|
| Atyeo C, 2021<br>USA             | Prospective cohort   | 55 women<br>22 mothers with confirmed COVID-19  | 56 | All pregnant women who were tested for SARS-CoV-2 infection in the third trimester.<br><br>It is unclear how testing was carried out.<br><br>2 groups<br>1) COVID negative<br>2) COVID positive                                                   | Mothers were diagnosed by IgG serological test for SARS-CoV-2.<br><br>Newborns were tested by RT-PCRs.           |                                                             |                                                                     |
| Buhimschi CS, 2020<br>USA        | Prospective cohort   | 369 women<br>29 mothers with confirmed COVID-19 |    | All pregnant women admitted to the University of Illinois.<br><br>Universal screening was carried out.<br><br>2 groups<br>1) SARS-CoV-2 positive<br>2) SARS-CoV-2 negative                                                                        | Mothers were diagnosed by RT-PCRs or rapid testing.<br><br>Newborns admitted to the NICU were tested by RT-PCRs. | Age, parity, ethnicity, chronic hypertension, pre-eclampsia | Pregnancy related: mode of delivery – caesarean section and vaginal |
| Chowdhury TI, 2021<br>Bangladesh | Retrospective cohort | 12 women<br>12 mothers with confirmed COVID-19  |    | All pregnant women with spontaneous abortion $\geq 11$ weeks' gestation and COVID-19 infection.<br><br>It is unclear how testing was carried out.<br><br>Exclusion criteria: known clinical and obstetric causes of abortion other than COVID-19. | Mothers were diagnosed by RT-PCRs.                                                                               | Age, obesity, parity                                        | COVID-related: admission to hospital                                |
| Cribru FM (1), 2021<br>Italy     | Retrospective cohort | 37 women<br>21 mothers with confirmed COVID-19  | 36 | All pregnant women admitted to hospital.<br><br>Universal screening was carried out.<br><br>2 groups<br>1) COVID +<br>2) COVID –                                                                                                                  | Mothers were diagnosed by RT-PCRs.<br><br>Newborns were tested by throat swabs.                                  | Asthma, myalgia, anosmia                                    |                                                                     |

|                                                    |                      |                                                        |     |                                                                                                                                                                                                                                                                                                                               |                                                                                                                |                                                                                          |                                                                                                                                                                                       |                               |
|----------------------------------------------------|----------------------|--------------------------------------------------------|-----|-------------------------------------------------------------------------------------------------------------------------------------------------------------------------------------------------------------------------------------------------------------------------------------------------------------------------------|----------------------------------------------------------------------------------------------------------------|------------------------------------------------------------------------------------------|---------------------------------------------------------------------------------------------------------------------------------------------------------------------------------------|-------------------------------|
| Debelenko L, 2021<br>USA                           | Retrospective cohort | 150 women<br><br>75 mothers with confirmed COVID-19    | 154 | All pregnant women admitted for labour and delivery at a medical center.<br><br>Universal screening was carried out.<br><br>2 groups<br>1) SARS-CoV-2 positive<br>2) SARS-CoV-2 negative<br><br>Subjects with indeterminate SARS-CoV-2 PCR testing results or reversal of positive to negative testing results were excluded. | Mothers were diagnosed by RT-PCRs.<br><br>Newborns were tested by RT-PCRs within 12-72 hours after delivery.   | Gestational diabetes, pregnancy-induced hypertension, pre-eclampsia, obesity, asthma     | Pregnancy related: preterm-premature rupture of membranes                                                                                                                             | Stillbirth                    |
| Elenga N, 2021<br>French Guiana                    | Prospective cohort   | 974 women<br><br>133 mothers with confirmed COVID-19   | 637 | All pregnant women admitted to Cayenne Hospital.<br><br>Universal screening was carried out.<br><br>2 groups<br>1) Maternal SARS-CoV-2 RT-PCR positive<br>2) Maternal SARS-CoV-2 RT-PCR negative                                                                                                                              | Mothers were diagnosed by RT-PCRs.<br><br>Newborns were tested by RT-PCRs at 48 hours - 7 days after delivery. | Age, diabetes, chronic hypertension, obesity, gestational diabetes, fever, pre-eclampsia | COVID related: all-cause mortality, pneumonia, admission to ICU<br><br>Pregnancy related: preterm delivery, mode of delivery – caesarean section and vaginal, post-partum haemorrhage | Stillbirth, admission to NICU |
| Finnegan C, 2021<br>Ireland                        | Retrospective cohort | 1980 women<br><br>9 mothers with confirmed COVID-19    |     | All pregnant women admitted to a large university teaching hospital.<br><br>Universal screening was carried out.                                                                                                                                                                                                              | Method of diagnosis is unclear.                                                                                |                                                                                          |                                                                                                                                                                                       |                               |
| Gobierno de Mexico (30th November), 2020<br>Mexico | Prospective cohort   | 8345 women<br><br>8345 mothers with confirmed COVID-19 |     | All pregnant and postpartum women diagnosed with COVID-19 (including confirmed cases) who were followed-up and reported by the Mexican government.<br><br>It is unclear how testing was carried out.                                                                                                                          | Method of diagnosis is unclear.                                                                                |                                                                                          |                                                                                                                                                                                       |                               |

|                         |                      |                                                      |     |                                                                                                                                                  |                                                                                                    |                                                                                                                                                                                                                                                                                               |                                                                                                                                                                                                                                                                                                                                                                                                         |                                                                                                                   |
|-------------------------|----------------------|------------------------------------------------------|-----|--------------------------------------------------------------------------------------------------------------------------------------------------|----------------------------------------------------------------------------------------------------|-----------------------------------------------------------------------------------------------------------------------------------------------------------------------------------------------------------------------------------------------------------------------------------------------|---------------------------------------------------------------------------------------------------------------------------------------------------------------------------------------------------------------------------------------------------------------------------------------------------------------------------------------------------------------------------------------------------------|-------------------------------------------------------------------------------------------------------------------|
| Hazari K, 2020<br>UAE   | Retrospective cohort | 164 women<br><br>79 mothers with confirmed COVID-19  | 32  | All women with COVID-19 admitted to Latifa Hospital.<br><br>Universal testing was carried out.<br><br>2 groups<br>1) Pregnant<br>2) Non-pregnant | Mothers and newborns were diagnosed by RT-PCRs.                                                    | Obesity, ethnicity, asthma, COPD, diabetes, gestational diabetes, chronic hypertension, any co-morbidity, fever, cough, breathlessness, myalgia, lymphopenia, raised D- dimers, raised CRP, raised lactate dehydrogenase, raised white cell count, high procalcitonin, any symptom, pregnancy | COVID-related: all-cause mortality, COVID-specific mortality, pneumonia, ARDS, respiratory failure, invasive and non-invasive ventilation, ECMO, thromboembolic complications, admission to ICU, severe COVID, acute renal injury, septicaemia<br><br>Pregnancy related: miscarriage, preterm delivery, gestational diabetes, mode of delivery – caesarean section and vaginal, post-partum haemorrhage | Stillbirth, neonatal death, gestational age at delivery, admission to NICU                                        |
| Joshi SD, 2020<br>India | Prospective cohort   | 133 women<br><br>133 mothers with confirmed COVID-19 | 137 | All pregnant women with COVID-19 who delivered at District Hospital.<br><br>It is unclear how testing was carried out.                           | Mothers were diagnosed by RT-PCRs.<br><br>Newborns were tested by RT-PCRs 48 hours after delivery. |                                                                                                                                                                                                                                                                                               | COVID-related: all-cause mortality, COVID-specific mortality, thromboembolic complications, admission to ICU, acute hepatic injury<br><br>Pregnancy related: preterm delivery, gestational diabetes, mode of delivery – caesarean section and vaginal, post-partum haemorrhage, psychosis                                                                                                               | Stillbirth, neonatal death, admission to NICU, neonatal sepsis, hypoxic-ischaemic encephalopathy, foetal distress |



|                              |                      |                                                        |     |                                                                                                                                                                                                                                |                                                                                                                                                                                                |                                                                                                                           |                                                                                                                                                                                         |
|------------------------------|----------------------|--------------------------------------------------------|-----|--------------------------------------------------------------------------------------------------------------------------------------------------------------------------------------------------------------------------------|------------------------------------------------------------------------------------------------------------------------------------------------------------------------------------------------|---------------------------------------------------------------------------------------------------------------------------|-----------------------------------------------------------------------------------------------------------------------------------------------------------------------------------------|
| Khushdil A, 2021<br>Pakistan | Prospective cohort   | 106 women<br><br>106 mothers with confirmed COVID-19   | 106 | All pregnant women with COVID-19 who were admitted to hospital.<br><br>Universal testing was carried out.                                                                                                                      | Mothers were diagnosed by RT-PCRs.<br><br>Newborns were tested by RT-PCRs 48 hours after delivery. If confirmed COVID positive, there was subsequent testing every 48-72 hours until negative. |                                                                                                                           |                                                                                                                                                                                         |
| Kubiak JM, 2021<br>USA       | Retrospective cohort | 88 women<br><br>88 mothers with confirmed COVID-19     |     | All pregnant women with COVID-19 admitted to a New York City Hospital.<br><br>Both symptomatic and universal screening was carried out.<br><br>2 groups<br>1) Symptomatic<br>2) Asymptomatic                                   | Mothers were diagnosed by IgM/IgG serological test for SARS-CoV-2.                                                                                                                             |                                                                                                                           |                                                                                                                                                                                         |
| Lang LK, 2020<br>USA         | Retrospective cohort | 1120 women<br><br>1120 mothers with confirmed COVID-19 | 257 | All pregnant women with COVID-19 in LA County.<br><br>It is unknown how testing was carried out.                                                                                                                               | Method of diagnosis is unclear.                                                                                                                                                                |                                                                                                                           | Pregnancy related: mode of delivery – caesarean section and vaginal                                                                                                                     |
| Lokken EM (1), 2021<br>USA   | Retrospective cohort | 240 women<br><br>240 mothers with confirmed COVID-19   |     | All pregnant women with confirmed SARS-CoV-2 infection admitted to hospital in Washington state.<br><br>Both universal and symptomatic screening were carried out.<br><br>2 groups<br>1) Not hospitalised for COVID-19 concern | Mothers were diagnosed by RT-PCRs.                                                                                                                                                             | Age, ethnicity, any co-morbidity, asthma, diabetes, chronic hypertension, obesity, 3 <sup>rd</sup> trimester, any symptom | COVID-related: ARDS, respiratory failure, invasive and non-invasive ventilation, oxygenation, thromboembolic complications, severe COVID<br><br>Pregnancy related: miscarriage, preterm |

|                         |                      |                                                         |  |                                                                                                                                                                                                                                                                                |                                                                                        |                                                                                                                                                                 |            |
|-------------------------|----------------------|---------------------------------------------------------|--|--------------------------------------------------------------------------------------------------------------------------------------------------------------------------------------------------------------------------------------------------------------------------------|----------------------------------------------------------------------------------------|-----------------------------------------------------------------------------------------------------------------------------------------------------------------|------------|
|                         |                      |                                                         |  | 2) Hospitalised for COVID-19 concern                                                                                                                                                                                                                                           |                                                                                        | delivery, gestational diabetes, mode of delivery – caesarean section and vaginal                                                                                |            |
| Lu-Culligan A, 2021 USA | Retrospective cohort | 39 women<br>38<br>39 mothers with confirmed COVID-19    |  | All pregnant women admitted to Labor and Birth at Yale New Haven hospital.<br><br>Both universal and symptomatic screening were carried out.<br><br>2 groups<br>1) COVID-19 cases<br>2) Subset of COVID-19 cases with placenta histology available<br>3) Histological controls | Mothers were diagnosed by RT-PCRs.<br><br>Newborns were tested by RT-PCRs at delivery. | Chronic hypertension, pre-eclampsia, diabetes, BMI                                                                                                              |            |
| McLaren Jr. R, 2021 USA | Retrospective cohort | 202 women<br>43 mothers with confirmed COVID-19         |  | All pregnant women who had a Caesarean birth.<br><br>It is unclear how screening was carried out.<br><br>2 groups<br>1) SARS-CoV-2 positive<br>2) SARS-CoV-2 negative                                                                                                          | Method of diagnosis is unclear.                                                        | COVID-related: admission to ICU                                                                                                                                 |            |
| Metkari AM, 2020 India  | Retrospective cohort | 205 women<br>180<br>205 mothers with confirmed COVID-19 |  | All pregnant and postpartum women with COVID-19 admitted to hospital.<br><br>Universal testing was carried out.<br><br>Exclusion criteria: SARS-CoV-19 negative, gynaecological patients, healthcare workers                                                                   | Mothers were diagnosed by RT-PCRs.                                                     | COVID-related: admission to ICU<br><br>Pregnancy related: miscarriage, preterm delivery, gestational diabetes, mode of delivery – caesarean section and vaginal | Stillbirth |

|                          |                      |                                                                                                             |      |                                                                                                                                                                                                                                                                                                                           |                                                                                                                                                                  |
|--------------------------|----------------------|-------------------------------------------------------------------------------------------------------------|------|---------------------------------------------------------------------------------------------------------------------------------------------------------------------------------------------------------------------------------------------------------------------------------------------------------------------------|------------------------------------------------------------------------------------------------------------------------------------------------------------------|
| Metz TD, 2021<br>USA     | Retrospective cohort | 1219 women<br><br>1219 mothers with confirmed COVID-19                                                      | 1196 | All pregnant patients with a singleton gestation and COVID who delivered at 1 of 33 US hospitals.<br><br>It is unclear how testing was carried out.<br><br>5 groups<br>1) Asymptomatic<br>2) Mild<br>3) Moderate<br>4) Severe<br>5) Critical                                                                              | Mothers were diagnosed by RT-PCRs or rapid antigen tests for SARS-CoV-2.<br><br>Method of diagnosis in newborns is unclear.                                      |
| Milln J, 2020<br>UK      | Retrospective cohort | 1300 women<br><br>32 mothers with suspected or confirmed COVID-19<br><br>30 mothers with confirmed COVID-19 |      | All pregnant women admitted to Newham University Hospital.<br><br>Symptomatic testing was carried out.<br><br>2 groups<br>1) Pregnant women diagnosed with SARS-CoV-2 infection between 12 March 2020 and 22 April 2020<br>2) Baseline departmental figures from women delivering between December 2019 and February 2020 | Laboratory-confirmed women were diagnosed by PCRs. Clinically diagnosed women were those with typical clinical, laboratory or radiological features of COVID-19. |
| Mostafa A, 2021<br>Egypt | Prospective cohort   | 11 women<br><br>3 mothers with confirmed COVID-19                                                           |      | All pregnant healthcare workers at 12 ASU healthcare facilities<br><br>Universal screening was carried out.<br><br>2 groups<br>1) Total<br>2) Seroconverted                                                                                                                                                               | Mothers were diagnosed by IgM/IgG serological test for SARS-CoV-2. RT-PCR was performed for those with positive serology.                                        |

|                            |                      |                                                      |    |                                                                                                                                                                                                                                                                 |                                                                                                              |                                                                                                           |                                                                                                                                                                                                                                                                                                                        |
|----------------------------|----------------------|------------------------------------------------------|----|-----------------------------------------------------------------------------------------------------------------------------------------------------------------------------------------------------------------------------------------------------------------|--------------------------------------------------------------------------------------------------------------|-----------------------------------------------------------------------------------------------------------|------------------------------------------------------------------------------------------------------------------------------------------------------------------------------------------------------------------------------------------------------------------------------------------------------------------------|
| Oakes MC, 2021<br>USA      | Retrospective cohort | 262 women<br><br>22 mothers with confirmed COVID-19  |    | All women with symptomatic COVID-19 at a hospital.<br><br>Symptomatic testing was carried out.<br><br>2 groups<br>1) pregnant COVID-19<br>2) non-pregnant COVID-19<br><br>Patients with asymptomatic COVID-19 were excluded.                                    | Mothers were diagnosed by RT-PCRs or rapid antigen testing.                                                  | Age, ethnicity, obesity, diabetes, smoking, breathlessness, any abnormal radiological findings, pregnancy | Need for ECMO,                                                                                                                                                                                                                                                                                                         |
| Oxana Z, 2021<br>USA       | Retrospective cohort | 1165 women<br><br>10 mothers with confirmed COVID-19 |    | All pregnant women who delivered at ProMedica Healthcare system.<br><br>Universal testing was carried out.<br><br>2 groups<br>1) SARS-CoV-2 positive mothers<br>2) SARS-CoV-2 negative mothers                                                                  | Mothers were diagnosed by RT-PCRs.<br><br>Newborns were tested by RT-PCRs at 24 and 48 hours after delivery. |                                                                                                           | Severe COVID<br><br>Gestational age at delivery, admission to NICU, Apgar score at 5 minutes                                                                                                                                                                                                                           |
| Ozurmeli M, 2021<br>Turkey | Retrospective cohort | 24 women<br><br>24 mothers with confirmed COVID-19   | 10 | All pregnant women with laboratory-confirmed SARS-CoV-2 admitted to two tertiary hospitals in Turkey.<br><br>It is unclear how testing was carried out.<br><br>Patients with negative results obtained by nasopharyngeal swabs and real-time PCR were excluded. | Mothers and newborns were diagnosed by RT-PCRs.                                                              |                                                                                                           | Any death, COVID related death, pneumonia, ARDS, invasive ventilation, oxygen through cannula only, thromboembolic complication, admission to ITU, acute cardiac/renal/hepatic injury, septicaemia, gestational diabetes, CS<br><br>Neonatal death, Gestational age at delivery, neonatal pneumonia, admission to NICU |

|                               |                      |                                                                                      |     |                                                                                                                                                                                                                                                                                                                                                                                                                                                                         |                                                                                                                                                |                                                                          |
|-------------------------------|----------------------|--------------------------------------------------------------------------------------|-----|-------------------------------------------------------------------------------------------------------------------------------------------------------------------------------------------------------------------------------------------------------------------------------------------------------------------------------------------------------------------------------------------------------------------------------------------------------------------------|------------------------------------------------------------------------------------------------------------------------------------------------|--------------------------------------------------------------------------|
| Quiner T, 2021<br>USA         | Retrospective cohort | 29 women<br><br>29 mothers with confirmed COVID-19                                   |     | All pregnant and peripartum women with COVID-19 treated at University of New Mexico Hospital.<br><br>It is unclear how testing was carried out.<br><br>2 groups<br>1) Native American<br>2) Non-Native American                                                                                                                                                                                                                                                         | Method of diagnosis is unclear.                                                                                                                | Invasive or non-invasive ventilation, CPAP or HFNC, severe COVID,        |
| Reale SC, 2021<br>USA         | Prospective cohort   | 2945 women<br><br>93 mothers with confirmed COVID-19                                 |     | All pregnant women admitted for labour and delivery at four Boston-area hospitals.<br><br>Universal screening was carried out.<br><br>2 groups<br>1) SARS-CoV-2 positive<br>2) SARS-CoV-2 negative<br><br>Exclusion criteria: patients not tested for SARS-CoV-2, patients testing positive prior to delivery but negative on admission for labour and delivery, patients residing outside of the Commonwealth of Massachusetts excluded from zip code related analyses | Mothers were diagnosed by RT-PCRs.                                                                                                             | Age, obesity, ethnicity, gestational diabetes, diabetes, asthma, smoking |
| Sanchez-Luna M, 2021<br>Spain | Prospective cohort   | 497 women<br><br>497 mothers with suspected or confirmed COVID-19<br><br>494 mothers | 503 | All pregnant women with COVID-19 during pregnancy or at the time of delivery who delivered at 1 of 79 Spanish hospitals.<br><br>Universal screening was carried out.                                                                                                                                                                                                                                                                                                    | Mothers were diagnosed by RT-PCR on respiratory samples or IgM/IgG serological test for SARS-CoV-2.<br><br>Newborns were diagnosed by RT-PCRs. |                                                                          |

|                                          |                      |                                                      |    |                                                                                                                                                                                                                                                                                                                                                       |                                                 |                                                                |                   |
|------------------------------------------|----------------------|------------------------------------------------------|----|-------------------------------------------------------------------------------------------------------------------------------------------------------------------------------------------------------------------------------------------------------------------------------------------------------------------------------------------------------|-------------------------------------------------|----------------------------------------------------------------|-------------------|
|                                          |                      |                                                      |    | with confirmed COVID-19                                                                                                                                                                                                                                                                                                                               |                                                 |                                                                |                   |
| Servei Catalana COPIA REP 01022021 Spain | Prospective cohort   | 558 women                                            |    | Pregnant women with COVID-19 admitted to hospitals in Catalonia.<br><br>It is unclear how testing was carried out.                                                                                                                                                                                                                                    |                                                 | Any comorbidity, age, fever, cough, breathlessness             |                   |
| Tanacan A, 2021 Turkey                   | Prospective cohort   | 180 women<br><br>90 mothers with confirmed COVID-19  |    | All pregnant women<br><br>It is unclear how testing was carried out.<br><br>2 groups<br>1) Pregnant women with confirmed COVID-19 infection<br>2) Pregnant women without any defined risk factor                                                                                                                                                      | Mothers were diagnosed by RT-PCRs.              | Age, BMI, pre-eclampsia                                        |                   |
| Vila-Candel R, 2021 Spain                | Retrospective cohort | 2708 women<br><br>13 mothers with confirmed COVID-19 | 13 | All pregnant women with COVID-19 delivering at 1 of 5 public hospitals in the Valencia Region.<br><br>Inclusion criteria: positive PCR determination for SARS-CoV-2, newborn with PCR determination for SARS-CoV-2 and singleton gestation.<br><br>It is unclear how testing was carried out.<br><br>Pregnant women with a positive PCR determination | Mothers and newborns were diagnosed by RT-PCRs. | Admission to ITU, preterm birth, gestational diabetes, CS, PPH | Admission to NICU |

|                     |                      |                                                      |     |                                                                                                                                                                                                                                                                                                                                                                       |                                                                                                                                                                                                      |                                                                                                                                                                                                 |                                                        |
|---------------------|----------------------|------------------------------------------------------|-----|-----------------------------------------------------------------------------------------------------------------------------------------------------------------------------------------------------------------------------------------------------------------------------------------------------------------------------------------------------------------------|------------------------------------------------------------------------------------------------------------------------------------------------------------------------------------------------------|-------------------------------------------------------------------------------------------------------------------------------------------------------------------------------------------------|--------------------------------------------------------|
|                     |                      |                                                      |     | admitted for medical or surgical reasons other than the delivery process were excluded.                                                                                                                                                                                                                                                                               |                                                                                                                                                                                                      |                                                                                                                                                                                                 |                                                        |
| Wilcox W, 2021 USA  | Retrospective cohort | 794 women<br><br>179 mothers with confirmed COVID-19 |     | All pregnant women who delivered at one of 11 NYC H + H facilities.<br><br>Both symptomatic and universal testing were carried out.                                                                                                                                                                                                                                   | Mothers were diagnosed by RT-PCRs.                                                                                                                                                                   |                                                                                                                                                                                                 |                                                        |
| ROUND 22            |                      |                                                      |     |                                                                                                                                                                                                                                                                                                                                                                       |                                                                                                                                                                                                      |                                                                                                                                                                                                 |                                                        |
| Ajith S, 2021 India | Retrospective cohort | 350 women<br><br>350 mothers with confirmed COVID-19 | 223 | All laboratory-confirmed women who delivered at a hospital and their newborns.<br><br>Universal screening was carried out.<br><br>Testing was carried out on patients with symptoms, a high-risk exposure, or who recently travelled abroad or to other states.<br><br>2 groups<br>1) Neonates with positive RT-PCR result<br>2) Neonates with negative RT-PCR result | Mothers were diagnosed by rapid antigen tests or RT-PCRs from nasopharyngeal swabs on admission for delivery.<br><br>Newborns were diagnosed by nasopharyngeal swabs within 24 hours after delivery. | COVID-related: invasive ventilation, admission to ICU, severe pneumonia<br><br>Pregnancy-related: miscarriage (spontaneous), preterm delivery, mode of delivery – caesarean section and vaginal | Stillbirth, foetal growth restriction, foetal distress |

|                                  |                      |                                                                                                                                            |      |                                                                                                                                                                                                                                                                                                                                     |                                                                                                                                                                                                                |                                                                                                                                                                                                                                                             |                                              |
|----------------------------------|----------------------|--------------------------------------------------------------------------------------------------------------------------------------------|------|-------------------------------------------------------------------------------------------------------------------------------------------------------------------------------------------------------------------------------------------------------------------------------------------------------------------------------------|----------------------------------------------------------------------------------------------------------------------------------------------------------------------------------------------------------------|-------------------------------------------------------------------------------------------------------------------------------------------------------------------------------------------------------------------------------------------------------------|----------------------------------------------|
| Andrikopoulou M (1), 2021<br>USA | Retrospective cohort | 157<br>women<br><br>157<br>mothers<br>with<br>confirmed<br>COVID-19                                                                        | 156  | All laboratory-confirmed women with singleton pregnancies who were admitted to a hospital for delivery.<br><br>It is unclear how testing was carried out.<br><br>2 groups<br>1) Symptomatic women with COVID-19<br>2) Asymptomatic women with COVID-19<br><br>Women with pregnancies with major congenital anomalies were excluded. | Mothers were diagnosed by nasopharyngeal swabs.                                                                                                                                                                | Age, BMI, smoking, ethnicity, chronic hypertension, diabetes, asthma, any symptom                                                                                                                                                                           |                                              |
| Arnaez J, 2021 Spain             | Retrospective cohort | 3031<br>women<br><br>35<br>mothers<br>with<br>suspected<br>or<br>confirmed<br>COVID-19                                                     | 3031 | All women and newborns recorded in the labour ward register and the neonatal admission register during the lockdown and de-escalation period.<br><br>It is unclear how testing was carried out.                                                                                                                                     | Newborns were diagnosed by nasopharyngeal swabs.                                                                                                                                                               |                                                                                                                                                                                                                                                             |                                              |
| Askary E, 2020 Iran              | Retrospective cohort | 16<br>women<br><br>16<br>mothers<br>with<br>suspected<br>or<br>confirmed<br>COVID-19<br><br>12<br>mothers<br>with<br>confirmed<br>COVID-19 | 12   | Laboratory-confirmed pregnant women admitted at three hospitals and their newborns.<br><br>It is unclear how testing was carried out.                                                                                                                                                                                               | Mothers were diagnosed if at least 2 of 3 criteria were met: (I) positive nasopharyngeal swabs, (II) abnormal radiological findings suggestive of COVID-19 and (III) clinical symptoms suggestive of COVID-19. | COVID-related:<br>COVID-specific mortality, pneumonia, acute respiratory distress syndrome, pulmonary embolism, admission to ICU, acute cardiac injury<br><br>Pregnancy-related:<br>Miscarriage, preterm premature rupture of membranes, mode of delivery – | Foetal growth restriction, admission to NICU |



|                        |                      |                                                                                                           |                                                                                                                                                                                                                                                                                                                                                                                 |                                                                                                                    |                                                                                                                                                             |                                                                          |
|------------------------|----------------------|-----------------------------------------------------------------------------------------------------------|---------------------------------------------------------------------------------------------------------------------------------------------------------------------------------------------------------------------------------------------------------------------------------------------------------------------------------------------------------------------------------|--------------------------------------------------------------------------------------------------------------------|-------------------------------------------------------------------------------------------------------------------------------------------------------------|--------------------------------------------------------------------------|
|                        |                      |                                                                                                           |                                                                                                                                                                                                                                                                                                                                                                                 | Newborns were diagnosed by nasopharyngeal swabs.                                                                   |                                                                                                                                                             | caesarean section and vaginal                                            |
| Aski SK (1), 2021 Iran | Retrospective cohort | 44 women<br><br>44 mothers with suspected or confirmed COVID-19<br><br>38 mothers with confirmed COVID-19 | All laboratory-confirmed women who developed ARDS admitted to nine Level III maternity hospitals, and all laboratory-confirmed women without ARDS admitted to three of the nine Level III maternity hospitals.<br><br>It is unclear how testing was carried out.<br><br>2 groups<br>1) Pregnant COVID-positive women with ARDS<br>2) Pregnant COVID-positive women without ARDS | Mothers were diagnosed by nasopharyngeal swabs or chest CT scan findings.                                          | Age, multiple pregnancy, chronic hypertension, asthma, fever, breathlessness, cough, myalgia, diarrhoea, lymphopaenia, raised CRP, abnormal LFT, raised LDH | COVID-related: acute respiratory distress syndrome, severe pneumonia     |
| Baptiste C, 2021 USA   | Prospective cohort   | 47 women<br><br>20 mothers with confirmed COVID-19                                                        | All women presenting to the labour and delivery unit at a tertiary centre.<br><br>Testing was carried out on all women at delivery if not previously confirmed as part of clinical care.<br><br>4 groups<br>1) Women with positive IgM only antibody status for SARS-CoV-2<br>2) Women with positive IgG only antibody status for SARS-CoV-2                                    | Mothers were diagnosed by nasopharyngeal swabs on admission and underwent serology IgM/IgG testing for SARS-CoV-2. |                                                                                                                                                             | Pregnancy-related: mode of delivery (caesarean)<br><br>Admission to NICU |

|                          |                      |                                                    |    |                                                                                                                                                                                                                                                                                                           |                                                                                                   |                                                                                                                                                                                                                                                       |                                                                                                                                                                                                                                 |                                                                                                     |
|--------------------------|----------------------|----------------------------------------------------|----|-----------------------------------------------------------------------------------------------------------------------------------------------------------------------------------------------------------------------------------------------------------------------------------------------------------|---------------------------------------------------------------------------------------------------|-------------------------------------------------------------------------------------------------------------------------------------------------------------------------------------------------------------------------------------------------------|---------------------------------------------------------------------------------------------------------------------------------------------------------------------------------------------------------------------------------|-----------------------------------------------------------------------------------------------------|
|                          |                      |                                                    |    | 3) Women with positive IgM and IgG antibody status for SARS-CoV-2<br>4) Women with no antibodies detected for SARS-CoV-2                                                                                                                                                                                  |                                                                                                   |                                                                                                                                                                                                                                                       |                                                                                                                                                                                                                                 |                                                                                                     |
| Berry M, 2021 USA        | Retrospective cohort | 91 women<br><br>91 mothers with confirmed COVID-19 | 60 | All laboratory-confirmed pregnant women who were admitted to the labour and delivery unit in a medical centre.<br><br>Universal screening was carried out.<br><br>3 groups<br>1) Asymptomatic women<br>2) Symptomatic women not requiring oxygen support<br>3) Symptomatic women requiring oxygen support | Mothers and newborns were diagnosed by nasopharyngeal swabs.                                      | Age, gestational age, obesity, ethnicity, any comorbidity, asthma, pre-eclampsia, chronic hypertension, gestational diabetes, fever, myalgia, diarrhoea, breathlessness, cough, leucocytosis, lymphopenia, abnormal liver function tests, any symptom | COVID-related: oxygenation, admission to ICU, acute kidney injury, acute hepatic injury<br><br>Pregnancy-related: preterm birth, gestational diabetes, mode of delivery – caesarean section and vaginal, postpartum haemorrhage | Stillbirth, admission to NICU, neonatal sepsis, hypoxic ischaemic encephalopathy, neonatal seizures |
| Buckley AB (1), 2021 USA | Prospective cohort   | 25 women<br><br>25 mothers with confirmed COVID-19 |    | All laboratory-confirmed women who delivered at a hospital.<br><br>It is unclear how testing was carried out.                                                                                                                                                                                             | Mothers were diagnosed by nasopharyngeal swabs and underwent serology IgG testing for SARS-CoV-2. |                                                                                                                                                                                                                                                       |                                                                                                                                                                                                                                 | Gestational age at delivery, birthweight                                                            |

|                            |                      |                                                     |                                                                                                                                                                                                                                                                                                                         |                                                                                                             |                                                                                                                       |
|----------------------------|----------------------|-----------------------------------------------------|-------------------------------------------------------------------------------------------------------------------------------------------------------------------------------------------------------------------------------------------------------------------------------------------------------------------------|-------------------------------------------------------------------------------------------------------------|-----------------------------------------------------------------------------------------------------------------------|
| Chisolm T, 2021 Jamaica    | Prospective cohort   | 249 women<br><br>37 mothers with confirmed COVID-19 | All women attending an antenatal clinic in a hospital.<br><br>Universal screening was carried out.                                                                                                                                                                                                                      | Mothers were diagnosed by nasopharyngeal swabs and serology IgG testing of peripheral blood for SARS-CoV-2. | COVID-related: all-cause mortality, invasive ventilation, admission to ICU<br><br>Pregnancy-related: preterm delivery |
| Collins A, 2021 USA        | Retrospective cohort | 224 women<br><br>58 mothers with confirmed COVID-19 | All women who delivered in a labour and delivery unit at a hospital.<br><br>Universal screening was carried out.<br><br>2 groups<br>1) Women with positive RT-PCR result<br>2) Women with negative RT-PCR result<br><br>Women who were less than 18 years of age or experienced an IUFD or neonatal death were excluded | Mothers were diagnosed by nasopharyngeal swabs on admission to the labour and delivery unit.                |                                                                                                                       |
| Colon-Aponte (1), 2021 USA | Prospective cohort   | 224 women<br><br>36 mothers with confirmed COVID-19 | All women with delivered placentas a large urban hospital.<br><br>Universal screening was carried out.<br><br>2 groups<br>1) SARS-CoV-2 positive cases<br>2) Controls (SARS-CoV-2 negative women)                                                                                                                       | Method of diagnosis is unclear.                                                                             | Pregnancy-induced hypertension, pre-eclampsia, gestational diabetes, diabetes                                         |

|                          |                      |                                                     |                                                                                                                                                                                                                                                                                                                                                                                        |                                                                                                                                                                                                                                                                                                                                                             |                                          |
|--------------------------|----------------------|-----------------------------------------------------|----------------------------------------------------------------------------------------------------------------------------------------------------------------------------------------------------------------------------------------------------------------------------------------------------------------------------------------------------------------------------------------|-------------------------------------------------------------------------------------------------------------------------------------------------------------------------------------------------------------------------------------------------------------------------------------------------------------------------------------------------------------|------------------------------------------|
| Colon-Aponte C, 2021 USA | Prospective cohort   | 24 women<br><br>12 mothers with confirmed COVID-19  | Women (SARS-CoV-2 positive cases and SARS-CoV-2 negative controls) randomly selected from the Miami Mother Baby Covid Collaborative (comprised of women delivering at a large urban hospital).<br><br>It is unclear how testing was carried out.<br><br>2 groups<br>1) SARS-CoV-2 positive cases<br>2) Matched controls (SARS-CoV-2 negative women)                                    | Method of diagnosis is unclear.                                                                                                                                                                                                                                                                                                                             | BMI, gestational age, multiple pregnancy |
| Cosma S (2), 2021 Italy  | Retrospective cohort | 164 women<br><br>17 mothers with confirmed COVID-19 | All pregnant patients attending a hospital for non-invasive prenatal diagnosis or admitted to care units for COVID-19-related symptoms, and their newborns. Only women with last menstruation at latest on February 22 <sup>nd</sup> , 2020 (1 month after the date of the first reported COVID-19 case in Piedmont, Italy) were included.<br><br>Universal screening was carried out. | Mothers were diagnosed either by nasopharyngeal swabs and serology IgG/IgM testing for SARS-CoV-2 at 12 weeks gestation. IgG/IgM testing for SARS-CoV-2 also occurred at 16 weeks, 21 weeks and at delivery.<br><br>Newborns were diagnosed by serology IgG/IgM testing for SARS-CoV-2 of arterial umbilical cord blood samples immediately after delivery. |                                          |

|                            |                      |                                                       |                                                                                                                                                                                                                                                                                                                                                                                                                                                                                                                                                                                                                                                                                                                                               |                                                                                                                                                                                                                       |                                                                                                                                                                                 |                                                                                                                                                                                                                                                                                                                                                                            |                                                                                                                                                                                                               |
|----------------------------|----------------------|-------------------------------------------------------|-----------------------------------------------------------------------------------------------------------------------------------------------------------------------------------------------------------------------------------------------------------------------------------------------------------------------------------------------------------------------------------------------------------------------------------------------------------------------------------------------------------------------------------------------------------------------------------------------------------------------------------------------------------------------------------------------------------------------------------------------|-----------------------------------------------------------------------------------------------------------------------------------------------------------------------------------------------------------------------|---------------------------------------------------------------------------------------------------------------------------------------------------------------------------------|----------------------------------------------------------------------------------------------------------------------------------------------------------------------------------------------------------------------------------------------------------------------------------------------------------------------------------------------------------------------------|---------------------------------------------------------------------------------------------------------------------------------------------------------------------------------------------------------------|
| Crosland A, 2021 USA       | Retrospective cohort | 595 women<br><br>42 mothers with confirmed COVID-19   | All laboratory-confirmed pregnant women aged 18 or over who were admitted to the labour and delivery unit in a hospital.<br><br>Universal screening was carried out.<br><br>2 groups<br>1) Symptomatic cases<br>2) Asymptomatic cases                                                                                                                                                                                                                                                                                                                                                                                                                                                                                                         | Mothers were diagnosed by nasopharyngeal swabs.                                                                                                                                                                       | Age, ethnicity, any comorbidity, BMI, gestational age, pregnancy-induced hypertension, gestational diabetes, any symptom, chronic hypertension, diabetes, asthma, COPD, smoking | Pregnancy-related: miscarriage, gestational diabetes, mode of delivery - caesarean section and vaginal, gestational hypertension                                                                                                                                                                                                                                           |                                                                                                                                                                                                               |
| Crovetto F (1), 2021 Spain | Prospective cohort   | 2225 women<br><br>317 mothers with confirmed COVID-19 | All pregnant women presenting to three hospitals for first/second trimester Down's syndrome screening or for delivery. Discarded maternal serum samples from routine blood tests of women presenting for screening were collected for testing. Maternal blood and foetal cord blood samples were obtained from women admitted for delivery.<br><br>Universal screening was carried out.<br><br>Women who withdrew consent, had undetermined lab results for SARS-CoV-2, whose blood sample could not be collected or who were referred for a SARS-CoV-2 from outside the catchment areas of the participating centres were excluded.<br><br>3 groups<br>1) Asymptomatic SARS-CoV-2 positive women<br>2) Symptomatic SARS-CoV-2 positive women | Mothers were diagnosed by nasopharyngeal swabs at delivery and maternal blood serum serology IgG/IgM testing for SARS-CoV-2.<br><br>Foetal cord blood serology IgG/IgM testing for SARS-CoV-2 took place at delivery. | Ethnicity, smoking, chronic hypertension, diabetes, obesity, asthma, parity, multiple pregnancy, any symptom                                                                    | COVID-related: all-cause mortality, pneumonia, invasive ventilation, non-invasive ventilation, admission to ICU, admission to hospital<br><br>Pregnancy-related: miscarriage, preterm delivery, premature rupture of membranes, gestational diabetes, mode of delivery - caesarean section and vaginal, chorioamnionitis, postpartum haemorrhage, gestational hypertension | Stillbirth, neonatal death, gestational age at delivery, admission to NICU, congenital malformations, Apgar score at '5, foetal distress, small-for-gestational age, neonatal metabolic acidosis, birthweight |

3) SARS-CoV-2 negative women

|                                |                      |                                                       |    |                                                                                                                                                                                                                                                                                                                                                                                     |                                                                                                 |                                                                                                                                                                                                                                                                                          |             |
|--------------------------------|----------------------|-------------------------------------------------------|----|-------------------------------------------------------------------------------------------------------------------------------------------------------------------------------------------------------------------------------------------------------------------------------------------------------------------------------------------------------------------------------------|-------------------------------------------------------------------------------------------------|------------------------------------------------------------------------------------------------------------------------------------------------------------------------------------------------------------------------------------------------------------------------------------------|-------------|
| Emeruwa U (2), 2021 USA        | Retrospective cohort | 2489 women<br><br>276 mothers with confirmed COVID-19 | 67 | All women who delivered at a hospital.<br><br>Universal screening was carried out.<br><br>5 groups<br>1) Asian women<br>2) Hispanic women<br>3) Non-Hispanic Black women<br>4) Non-Hispanic women<br>5) Women of other races/ethnicities                                                                                                                                            | Mothers were diagnosed either by nasopharyngeal and/or serology testing for SARS-CoV-2.         | COVID-related: pneumonia, admission to hospital, severe pneumonia<br><br>Pregnancy-related: preterm delivery, premature rupture of membranes, gestational diabetes, mode of delivery - caesarean section and vaginal, chorioamnionitis, postpartum haemorrhage, gestational hypertension | Birthweight |
| Engjom H (1), 2021 5 countries | Prospective cohort   | 76 women<br><br>56 mothers with confirmed COVID-19    | 67 | All laboratory-confirmed pregnant women with COVID-related admissions to hospital in five Nordic countries.<br><br>Screening practices varied between countries and over time. Testing was carried out on women with severe symptoms, women with mild symptoms or close contact, or via universal screening.<br><br>Women admitted to hospital for obstetric reasons were excluded. | Mothers were diagnosed by nasopharyngeal swabs 14 days or fewer prior to admission to hospital. |                                                                                                                                                                                                                                                                                          |             |

|                          |                    |           |     |                                                                                                                                                                                                                                                                                                                                                                                                                                                                                                                                                                                                                                                                                                                                                                                                                                                                                                                                                  |                                                 |                                                                                                                                        |                                                                                                                           |
|--------------------------|--------------------|-----------|-----|--------------------------------------------------------------------------------------------------------------------------------------------------------------------------------------------------------------------------------------------------------------------------------------------------------------------------------------------------------------------------------------------------------------------------------------------------------------------------------------------------------------------------------------------------------------------------------------------------------------------------------------------------------------------------------------------------------------------------------------------------------------------------------------------------------------------------------------------------------------------------------------------------------------------------------------------------|-------------------------------------------------|----------------------------------------------------------------------------------------------------------------------------------------|---------------------------------------------------------------------------------------------------------------------------|
| Erol Koc EM, 2020 Turkey | Prospective cohort | 108 women | 108 | <p>All women with spontaneous and singleton pregnancies admitted to a hospital.</p> <p>It is unclear how testing was carried out.</p> <p>2 groups<br/> 1) Women diagnosed with COVID-19 in the obstetric isolation unit (cases)<br/> 2) Women without COVID-19 on the obstetrics unit (controls)</p> <p>Women who did not give birth within three days of a positive RT-PCR test for SARS-CoV-2 were excluded from the study group.<br/> Women with chronic diseases (Rheumatological diseases, renal failure, vascular malformations, hypertension, cardiac disease, diabetes mellitus, obesity, hypothyroidism, hyperthyroidism, congenital haematological disorders), acute inflammatory conditions (acute pancreatitis, acute appendicitis), pregnancy complications (gestational diabetes, preterm premature rupture of membranes, preeclampsia), multiple pregnancies and pregnant women using anticoagulant medication were excluded.</p> | Mothers were diagnosed by nasopharyngeal swabs. | <p>COVID-related: all-cause mortality, severe pneumonia</p> <p>Pregnancy-related: mode of delivery - caesarean section and vaginal</p> | Neonatal death, gestational age at delivery, admission to NICU, Apgar score at 5', birthweight, large-for-gestational age |
|--------------------------|--------------------|-----------|-----|--------------------------------------------------------------------------------------------------------------------------------------------------------------------------------------------------------------------------------------------------------------------------------------------------------------------------------------------------------------------------------------------------------------------------------------------------------------------------------------------------------------------------------------------------------------------------------------------------------------------------------------------------------------------------------------------------------------------------------------------------------------------------------------------------------------------------------------------------------------------------------------------------------------------------------------------------|-------------------------------------------------|----------------------------------------------------------------------------------------------------------------------------------------|---------------------------------------------------------------------------------------------------------------------------|

|                              |                    |                                                        |                                                                                                                                                                                                                                                                                        |                                                                                                                           |                                                                                                                              |
|------------------------------|--------------------|--------------------------------------------------------|----------------------------------------------------------------------------------------------------------------------------------------------------------------------------------------------------------------------------------------------------------------------------------------|---------------------------------------------------------------------------------------------------------------------------|------------------------------------------------------------------------------------------------------------------------------|
| Escher M, 2021 64 countries  | Prospective cohort | 1502 women<br><br>1502 mothers with confirmed COVID-19 | All laboratory-confirmed pregnant women admitted to hospitals in 64 countries.<br><br>It is unclear how testing was carried out.                                                                                                                                                       | Method of diagnosis is unclear.                                                                                           |                                                                                                                              |
| Fisher SA, 2021 USA          | Prospective cohort | 157 women<br><br>157 mothers with confirmed COVID-19   | All laboratory-confirmed pregnant women at a large urban hospital.<br><br>Testing was carried out on patients with clinical suspicion or on admission by universal screening.<br><br>2 groups<br>1) Asymptomatic SARS-CoV-2 positive women<br>2) Symptomatic SARS-CoV-2 positive women | Mothers were diagnosed by nasopharyngeal swabs.                                                                           |                                                                                                                              |
| Flores-Pliego A, 2021 Mexico | Prospective cohort | 15 women<br><br>11 mothers with confirmed COVID-19     | All women with delivered placentas at a hospital.<br><br>Universal screening was carried out.<br><br>2 groups<br>1) COVID-positive cases<br>2) Controls (COVID-negative women)                                                                                                         | Mothers were diagnosed by nasopharyngeal swabs at admission.<br><br>Newborns were diagnosed by RT-PCRs on saliva samples. |                                                                                                                              |
| Forde B (1), 2021 USA        | Prospective cohort | 811 women<br><br>63 mothers with confirmed COVID-19    | All obstetric patients admitted to a medical centre.<br><br>Universal screening was carried out.<br><br>3 groups<br>1) Asymptomatic COVID-19 positive women                                                                                                                            | Mothers were diagnosed by nasopharyngeal swabs.                                                                           | Age, BMI, ethnicity, parity, chronic hypertension, diabetes, gestational diabetes, smoking, pre-eclampsia, pregnancy-induced |



|                      |                      |                                                     |    |                                                                                                                                                                                                                      |                                                                                                                        |                                                                                                                                                                                            |
|----------------------|----------------------|-----------------------------------------------------|----|----------------------------------------------------------------------------------------------------------------------------------------------------------------------------------------------------------------------|------------------------------------------------------------------------------------------------------------------------|--------------------------------------------------------------------------------------------------------------------------------------------------------------------------------------------|
|                      |                      |                                                     |    | 2) Symptomatic COVID-19 positive women<br>3) COVID-19 negative women                                                                                                                                                 |                                                                                                                        | hypertension, cough, breathlessness, fever                                                                                                                                                 |
| Forde B, 2021 USA    | Prospective cohort   | 811 women<br><br>63 mothers with confirmed COVID-19 |    | All obstetric patients who were tested for COVID-19 and delivered at a medical centre.<br><br>Universal screening was carried out.<br><br>2 groups<br>1) COVID-19 positive women<br>2) COVID-19 negative women       | Method of diagnosis is unclear.                                                                                        | COVID-related: extracorporeal membrane oxygenation<br><br>Pregnancy-related: gestational diabetes, mode of delivery – caesarean section, gestational hypertension, urinary tract infection |
| Glynn SM, 2021 USA   | Prospective cohort   | 90 women<br><br>90 mothers with confirmed COVID-19  | 90 | All laboratory-confirmed women with delivered placentas at one hospital.<br><br>Universal screening was carried out at delivery.<br><br>2 groups<br>1) Women with non-acute COVID-19<br>2) Women with acute COVID-19 | Mothers were diagnosed by nasopharyngeal swabs. A subset of mothers underwent serology IgG/IgM testing for SARS-CoV-2. |                                                                                                                                                                                            |
| Gold S (1), 2021 USA | Retrospective cohort | 486 women<br><br>91 mothers with confirmed COVID-19 |    | All pregnant women who delivered at three hospitals.<br><br>It is unclear how testing was carried out.<br><br>2 groups<br>1) SARS-CoV-2 positive cases<br>2) Matched SARS-CoV-2 negative controls                    | Method of diagnosis is unclear.                                                                                        | :                                                                                                                                                                                          |

|                               |                      |                                                       |                                                                                                                                                                                                                                                            |                                                            |                                                                                                                                   |                                                                                                                                                                                                                                                        |                                |
|-------------------------------|----------------------|-------------------------------------------------------|------------------------------------------------------------------------------------------------------------------------------------------------------------------------------------------------------------------------------------------------------------|------------------------------------------------------------|-----------------------------------------------------------------------------------------------------------------------------------|--------------------------------------------------------------------------------------------------------------------------------------------------------------------------------------------------------------------------------------------------------|--------------------------------|
| Gold S, 2021 USA              | Retrospective cohort | 486 women<br><br>91 mothers with confirmed COVID-19   | All pregnant women who delivered at three hospitals.<br><br>It is unclear how testing was carried out.<br><br>3 groups<br>1) Asymptomatic SARS-CoV-2 positive cases<br>2) Symptomatic SARS-CoV-2 positive cases<br>3) Matched SARS-CoV-2 negative controls | Method of diagnosis is unclear.                            | Age, gestational age, BMI, parity, ethnicity, asthma, pregnancy-induced hypertension, diabetes, gestational diabetes, any symptom | COVID-related: admission to ICU<br><br>Pregnancy-related: preterm delivery, premature rupture of membranes, gestational diabetes, mode of delivery – caesarean section and vaginal, chorioamnionitis, postpartum haemorrhage, gestational hypertension | Apgar score at 5', birthweight |
| Haizler-Cohen L (1), 2021 USA | Retrospective cohort | 2930 women<br><br>448 mothers with confirmed COVID-19 | All women admitted to a labour and delivery unit at seven hospitals with available SARS-CoV-2 antibody results.<br><br>It is unclear how testing was carried out.<br><br>2 groups<br>1) SARS-CoV-2 positive women<br>2) SARS-CoV-2 negative women          | Mothers were diagnosed by serology testing for SARS-CoV-2. |                                                                                                                                   | COVID-related: severe pneumonia                                                                                                                                                                                                                        |                                |
| Hostage JC, 2021 USA          | Retrospective cohort | 131 women<br><br>131 mothers with confirmed COVID-19  | All laboratory-confirmed pregnant women presenting at a hospital.<br><br>It is unclear how testing was carried out.<br><br>2 groups<br>1) Women with low severity COVID-19<br>2) Women with high severity COVID-19                                         | Method of diagnosis is unclear.                            |                                                                                                                                   |                                                                                                                                                                                                                                                        |                                |

|                        |                      |                                                     |     |                                                                                                                                                                                                                                                                                        |                                                              |                                     |                                                                                       |                                                                                                                        |
|------------------------|----------------------|-----------------------------------------------------|-----|----------------------------------------------------------------------------------------------------------------------------------------------------------------------------------------------------------------------------------------------------------------------------------------|--------------------------------------------------------------|-------------------------------------|---------------------------------------------------------------------------------------|------------------------------------------------------------------------------------------------------------------------|
| Ibrahim SA, 2021 USA   | Retrospective cohort | 586 women<br><br>66 mothers with confirmed COVID-19 |     | All women tested for COVID-19 at two labour and delivery units.<br><br>Universal screening was carried out.<br><br>4 groups<br>1) Women with blood group A<br>2) Women with blood group B<br>3) Women with blood group AB<br>4) Women with blood group O                               | Method of diagnosis is unclear.                              |                                     |                                                                                       |                                                                                                                        |
| Izewski J, 2021 USA    | Retrospective cohort | 515 women<br><br>55 mothers with confirmed COVID-19 | 515 | All pregnant women with singleton pregnancies and tested for COVID-19 at two labour and delivery units.<br><br>Universal screening was carried out.<br><br>3 groups<br>1) Asymptomatic COVID-19 positive women<br>2) Symptomatic COVID-19 positive women<br>3) COVID-19 negative women | Method of diagnosis for mothers and newborns is unclear.     | Any symptom                         | Pregnancy-related: preterm delivery                                                   | Neonatal death, admission to NICU, neonatal sepsis, respiratory distress syndrome, transient tachypnoea of the newborn |
| Jaiswala N, 2021 India | Prospective cohort   | 54 women<br><br>27 mothers with confirmed COVID-19  | 54  | Consecutive asymptomatic and mildly asymptomatic singleton pregnant women with confirmed COVID-19 delivered at one hospital.<br><br>Universal screening was carried out.<br><br>2 groups<br>1) Pregnant women with COVID-19<br>2) Pregnant women without COVID-19                      | Mothers were diagnosed by nasopharyngeal swabs on admission. | Age, gestational age, parity, fever | Pregnancy-related: mode of delivery – caesarean section and vaginal, chorioamnionitis | Stillbirth, Apgar score at 5 minutes                                                                                   |

|                         |                      |                                                      |    |                                                                                                                                                                                                                                                                                                                                                                                                                                    |                                                                                                                                                                      |                                                                                                                                                                                                                                                       |                                                                                                                                                                  |
|-------------------------|----------------------|------------------------------------------------------|----|------------------------------------------------------------------------------------------------------------------------------------------------------------------------------------------------------------------------------------------------------------------------------------------------------------------------------------------------------------------------------------------------------------------------------------|----------------------------------------------------------------------------------------------------------------------------------------------------------------------|-------------------------------------------------------------------------------------------------------------------------------------------------------------------------------------------------------------------------------------------------------|------------------------------------------------------------------------------------------------------------------------------------------------------------------|
|                         |                      |                                                      |    | Women with a diagnosis or suspicion of foetal growth restriction, pregnancy associated hypertensive disorders or diabetes mellitus were excluded.                                                                                                                                                                                                                                                                                  |                                                                                                                                                                      |                                                                                                                                                                                                                                                       |                                                                                                                                                                  |
| Jani S, 2021 USA        | Retrospective cohort | 1001 women<br><br>34 mothers with confirmed COVID-19 |    | All laboratory-confirmed women with delivered placentas at one hospital and their newborns.<br><br>Testing was initially carried out on women with clinical suspicion. Universal screening started from April 21 <sup>st</sup> for women admitted to the labour and delivery unit.                                                                                                                                                 | Mothers were diagnosed by nasopharyngeal swabs.<br><br>Newborns born to COVID-positive mothers were diagnosed by nasopharyngeal swabs at 24 hours after delivery.    | COVID-related: invasive ventilation, oxygenation, severe pneumonia<br><br>Pregnancy-related: deep vein thrombosis, preterm delivery, gestational diabetes, mode of delivery – caesarean section and vaginal, gestational hypertension, polyhydramnios | Gestational age at delivery, congenital malformation, respiratory distress syndrome, transient tachypnoea of the newborn, birthweight, small-for-gestational age |
| Joseph NT (2), 2021 USA | Prospective cohort   | 23 women<br><br>23 mothers with confirmed COVID-19   | 23 | All laboratory-confirmed women with delivered placentas at a hospital.<br><br>It is unclear how testing was carried out.<br><br>3 groups<br>1) women recruited from 36w1d-40w0d, all delivered <7 days of COVID-positive diagnosis<br>2) women recruited from 31w0d-37w4d, all delivered >7 days but <28d of COVID-positive diagnosis<br>3) women recruited from 19w3d-35w6d, all delivered >28 days from COVID-positive diagnosis | Mothers were diagnosed by nasopharyngeal swabs.<br><br>Paired maternal and cord blood samples were diagnosed by serology IgG/IgM testing for SARS-CoV-2 at delivery. |                                                                                                                                                                                                                                                       |                                                                                                                                                                  |

|                        |                      |                                                     |   |                                                                                                                                                                                                                                                                                                                                                                                                             |                                                                               |                                                                                                                                                              |
|------------------------|----------------------|-----------------------------------------------------|---|-------------------------------------------------------------------------------------------------------------------------------------------------------------------------------------------------------------------------------------------------------------------------------------------------------------------------------------------------------------------------------------------------------------|-------------------------------------------------------------------------------|--------------------------------------------------------------------------------------------------------------------------------------------------------------|
| Kamali A, 2021 Iran    | Prospective cohort   | 13 women<br><br>13 mothers with confirmed COVID-19  | 6 | All laboratory-confirmed pregnant women admitted to two hospitals and their newborns.<br><br>Testing was carried out on women with clinical suspicion.                                                                                                                                                                                                                                                      | Mothers and newborns were diagnosed by nasopharyngeal or oropharyngeal swabs. | COVID-related: all-cause mortality, time from illness onset to outcome (recovery)<br><br>Pregnancy-related: mode of delivery – caesarean section and vaginal |
| Kowalczyk JJ, 2021 USA | Retrospective cohort | 20 women<br><br>10 mothers with confirmed COVID-19  |   | All pregnant patients admitted to the labour and delivery unit who were laboratory-confirmed or under investigation for COVID-19.<br><br>It is unclear how testing was carried out.<br><br>2 groups<br>1) SARS-CoV-2 positive women<br>2) SARS-CoV-2 negative women                                                                                                                                         | Mothers were diagnosed by nasopharyngeal swabs.                               |                                                                                                                                                              |
| Lucinde R, 2021 Kenya  | Prospective cohort   | 196 women<br><br>91 mothers with confirmed COVID-19 |   | All pregnant women attending antenatal care services for the first time at a hospital. Residual maternal serum samples from routine blood tests of the women were collected for testing.<br><br>Universal screening was carried out.<br><br>Women who did not provide a sample at their first antenatal care visit, or women not attending the antenatal care services for their first visit were excluded. | Mothers were diagnosed by serology IgG testing for SARS-CoV-2.                |                                                                                                                                                              |

|                       |                      |                                                                   |                                                                                                                                                                                                                                                                                                                                                                                                             |                                                                |                                               |
|-----------------------|----------------------|-------------------------------------------------------------------|-------------------------------------------------------------------------------------------------------------------------------------------------------------------------------------------------------------------------------------------------------------------------------------------------------------------------------------------------------------------------------------------------------------|----------------------------------------------------------------|-----------------------------------------------|
| Lucinde R, 2021 Kenya | Prospective cohort   | 419 women<br><br>19 mothers with confirmed COVID-19               | All pregnant women attending antenatal care services for the first time at a hospital. Residual maternal serum samples from routine blood tests of the women were collected for testing.<br><br>Universal screening was carried out.<br><br>Women who did not provide a sample at their first antenatal care visit, or women not attending the antenatal care services for their first visit were excluded. | Mothers were diagnosed by serology IgG testing for SARS-CoV-2. |                                               |
| Madden N, 2021 USA    | Retrospective cohort | 1715 women<br><br>167 mothers with confirmed COVID-19             | All women who received pre-admission COVID-19 testing at a hospital.<br><br>Universal screening was carried out at admission.<br><br>2 groups<br>1) COVID-19 positive women<br>2) COVID-19 negative women<br><br>Patients with chronic hypertension or multiple gestations were excluded.                                                                                                                   | Mothers were diagnosed by nasopharyngeal swabs.                | Pregnancy-induced hypertension, pre-eclampsia |
| McCabe M, 2021 USA    | Prospective cohort   | 160 women<br><br>113 mothers with suspected or confirmed COVID-19 | All pregnant women with suspected or laboratory-confirmed COVID-19, and postpartum women with laboratory-confirmed COVID-19.<br><br>Universal screening was carried out for postpartum women on admission for delivery. It is unclear how testing was carried out                                                                                                                                           | Method of diagnosis is unclear.                                | COVID-related: admission to hospital          |

|                       |                      |                                                        |      |                                                                                                                                                                                                                                                  |                                 |                                                                                                        |                                                                                                                                                                                                                                                                                                                                          |                                               |
|-----------------------|----------------------|--------------------------------------------------------|------|--------------------------------------------------------------------------------------------------------------------------------------------------------------------------------------------------------------------------------------------------|---------------------------------|--------------------------------------------------------------------------------------------------------|------------------------------------------------------------------------------------------------------------------------------------------------------------------------------------------------------------------------------------------------------------------------------------------------------------------------------------------|-----------------------------------------------|
|                       |                      | 93 mothers with confirmed COVID-19                     |      | pregnant women who had not been admitted to hospital.                                                                                                                                                                                            |                                 |                                                                                                        |                                                                                                                                                                                                                                                                                                                                          |                                               |
| McKinney JR, 2021 USA | Retrospective cohort | 317 women<br><br>317 mothers with confirmed COVID-19   |      | All laboratory-confirmed pregnant women admitted at two institutions.<br><br>It is unclear how testing was carried out.<br><br>3 groups<br>1) Asymptomatic women<br>2) Women with mild COVID-19 disease<br>3) Women with severe COVID-19 disease | Method of diagnosis is unclear. | Smoking, chronic hypertension, pregnancy-induced hypertension, diabetes, gestational diabetes, asthma  | COVID-related: invasive and non-invasive ventilation, admission to hospital, severe pneumonia<br><br>Pregnancy-related: gestational diabetes, mode of delivery – caesarean section and vaginal, gestational hypertension                                                                                                                 |                                               |
| Metz TD (1), 2021 USA | Retrospective cohort | 1219 women<br><br>1219 mothers with confirmed COVID-19 | 1206 | All laboratory-confirmed pregnant women with singleton gestations who delivered at 33 hospitals.<br><br>Universal screening was carried out.<br><br>Women with positive antibody testing alone were excluded.                                    | Method of diagnosis is unclear. | Cough, myalgia, fever, anosmia, diarrhoea, obesity, ethnicity, smoking, diabetes, chronic hypertension | COVID-related: respiratory failure, oxygenation, severe pneumonia, sepsis, multiple organ dysfunction or failure<br><br>Pregnancy-related: venous thromboembolism, miscarriage, preterm delivery, spontaneous preterm delivery, premature rupture of membranes, mode of delivery – caesarean section and vaginal, postpartum haemorrhage | Stillbirth, neonatal death, admission to NICU |

|                          |                      |                                                      |                                                                                                                                                                                                                                                                                                                                                           |                                                                                                    |                                                                                                                                                                                                                                                                                                                   |                                                                                                                                                        |
|--------------------------|----------------------|------------------------------------------------------|-----------------------------------------------------------------------------------------------------------------------------------------------------------------------------------------------------------------------------------------------------------------------------------------------------------------------------------------------------------|----------------------------------------------------------------------------------------------------|-------------------------------------------------------------------------------------------------------------------------------------------------------------------------------------------------------------------------------------------------------------------------------------------------------------------|--------------------------------------------------------------------------------------------------------------------------------------------------------|
| Molenaar NM, 2021 USA    | Prospective cohort   | 708 women<br><br>117 mothers with confirmed COVID-19 | All pregnant women receiving obstetrical care who had given birth to liveborn singleton infants at two hospitals.<br><br>Universal screening was carried out.<br><br>2 groups<br>1) SARS-CoV-2 IgG antibody negative women<br>2) SARS-CoV-2 IgG antibody positive women<br><br>Women who experienced a miscarriage, abortion or stillbirth were excluded. | Mothers were diagnosed by nasopharyngeal swabs and serology IgG testing for SARS-CoV-2.            | COVID-related: all-cause mortality<br><br>Pregnancy-related: preterm delivery, mode of delivery – caesarean section and vaginal                                                                                                                                                                                   | Neonatal death, gestational age at delivery, admission to NICU, length of NICU stay, birthweight, small-for-gestational age, large-for-gestational age |
| Mrazguia C, 2021 Tunisia | Retrospective cohort | 11 women<br><br>11 mothers with confirmed COVID-19   | All laboratory-confirmed pregnant women admitted to the obstetrics and gynaecology department at a hospital and their newborns.<br><br>It is unclear how testing was carried out.                                                                                                                                                                         | Mothers were diagnosed by nasopharyngeal swabs.<br><br>Two newborns were diagnosed by throat swabs | COVID-related: all-cause mortality, COVID-specific mortality, acute respiratory distress syndrome, invasive ventilation, oxygenation, functional renal failure<br><br>Pregnancy-related: preterm delivery, premature rupture of membranes, gestational diabetes, mode of delivery – caesarean section and vaginal | Neonatal death, admission to NICU, foetal distress                                                                                                     |



|                        |                      |                                                      |     |                                                                                                                                                                                                                                                                                                                                                                                                                                                                                                                                                                               |                                                             |                     |                                                                                                                                                                |                                                                                                                                                                                         |
|------------------------|----------------------|------------------------------------------------------|-----|-------------------------------------------------------------------------------------------------------------------------------------------------------------------------------------------------------------------------------------------------------------------------------------------------------------------------------------------------------------------------------------------------------------------------------------------------------------------------------------------------------------------------------------------------------------------------------|-------------------------------------------------------------|---------------------|----------------------------------------------------------------------------------------------------------------------------------------------------------------|-----------------------------------------------------------------------------------------------------------------------------------------------------------------------------------------|
| Nanavati R, 2021 India | Retrospective cohort | 122 women<br><br>122 mothers with confirmed COVID-19 | 125 | <p>All newborns with suspected SARS-CoV-2 infection admitted to the neonatal intensive care unit and their mothers.</p> <p>It is unclear how testing was carried out on mothers. Testing was carried out on newborns born to mothers antenatally diagnosed with COVID-19 within the first 24 hours of life. Newborns born to mothers diagnosed postnatally were tested immediately following maternal diagnosis. Testing was also carried out on newborns with clinical suspicion.</p> <p>2 groups<br/>1) SARS-CoV-2 exposed neonates<br/>2) SARS-CoV-2 infected neonates</p> | Mothers and newborns were diagnosed by nasopharyngeal swabs |                     | <p>Pregnancy-related: preterm delivery, preterm premature rupture of membranes, mode of delivery – caesarean section and vaginal, gestational hypertension</p> | <p>Neonatal death, neonatal pneumonia, neonatal sepsis, foetal distress, birthweight, small-for-gestational age, respiratory distress syndrome, transient tachypnoea of the newborn</p> |
| Ndubizu C, 2021 USA    | Prospective cohort   | 224 women<br><br>36 mothers with confirmed COVID-19  |     | <p>All pregnant women admitted to one hospital who underwent screening for SARS-CoV-2 infection.</p> <p>Universal screening was carried out.</p> <p>2 groups<br/>1) SARS-CoV-2 positive women<br/>2) SARS-CoV-2 negative women</p>                                                                                                                                                                                                                                                                                                                                            | Method of diagnosis is unclear.                             | Ethnicity, age, BMI |                                                                                                                                                                |                                                                                                                                                                                         |

|                          |                      |                                                      |                                                                                                                                                                                                                                                                                                                                                                                               |                                                                                        |                                                                                                            |
|--------------------------|----------------------|------------------------------------------------------|-----------------------------------------------------------------------------------------------------------------------------------------------------------------------------------------------------------------------------------------------------------------------------------------------------------------------------------------------------------------------------------------------|----------------------------------------------------------------------------------------|------------------------------------------------------------------------------------------------------------|
| Nuno M, 2021 USA         | Retrospective cohort | 171 women<br><br>171 mothers with confirmed COVID-19 | All laboratory-confirmed pregnant women above 18 years of age who were admitted to five medical centres and were recorded in The COVID-19 Research Data Set.<br><br>It is unclear how testing was carried out.                                                                                                                                                                                | Mothers were diagnosed by nasopharyngeal swabs.                                        |                                                                                                            |
| Ona S, 2021 USA          | Retrospective cohort | 91 women<br><br>7 mothers with confirmed COVID-19    | All laboratory-confirmed women with an antenatal diagnosis of foetal growth restriction who delivered at one hospital.<br><br>It is unclear how testing was carried out.<br><br>2 groups<br>1) Women with normal umbilical artery Dopplers<br>2) Women with abnormal umbilical artery Dopplers<br><br>Women with pregnancies involving multiple gestations or foetal anomalies were excluded. | Mothers were diagnosed by nasopharyngeal swabs or serology IgG testing for SARS-CoV-2. |                                                                                                            |
| Pineles BL (1), 2021 USA | Retrospective cohort | 61 women<br><br>61 mothers with confirmed COVID-19   | All laboratory-confirmed pregnant women admitted for symptomatic COVID-19 at several hospitals.<br><br>It is unclear how testing was carried out.<br><br>2 groups<br>1) Pregnant women<br>2) Postpartum women                                                                                                                                                                                 | Method of diagnosis is unclear.                                                        | COVID-related: acute respiratory distress syndrome, severe pneumonia<br><br>Pregnancy-related: miscarriage |

|                          |                      |                                                      |    |                                                                                                                                                                                                                                                                                                                                                                                                                  |                                                 |                                                                                                                          |                                |
|--------------------------|----------------------|------------------------------------------------------|----|------------------------------------------------------------------------------------------------------------------------------------------------------------------------------------------------------------------------------------------------------------------------------------------------------------------------------------------------------------------------------------------------------------------|-------------------------------------------------|--------------------------------------------------------------------------------------------------------------------------|--------------------------------|
| Saimin J, 2021 Indonesia | Retrospective cohort | 41 women<br><br>41 mothers with confirmed COVID-19   | 35 | All laboratory-confirmed pregnant women admitted at two hospitals, with complete data available on their characteristics, clinical features, laboratory tests, imaging, management, and maternal and neonatal outcomes.<br><br>It is unclear how testing was carried out.<br>2 groups<br>1) Women whose fetuses/neonates were in good condition<br>2) Women whose fetuses/neonates experienced asphyxia          | Mothers were diagnosed by nasopharyngeal swabs. | COVID-related: all-cause mortality, pneumonia<br><br>Pregnancy-related: mode of delivery – caesarean section and vaginal | Birthweight, neonatal asphyxia |
| Salmanian B, 2021 USA    | Retrospective cohort | 314 women<br><br>314 mothers with confirmed COVID-19 |    | All laboratory-confirmed pregnant women admitted at two hospitals.<br><br>It is unclear how testing was carried out.<br><br>4 groups<br>1) Women in 1 <sup>st</sup> social vulnerability index quartile<br>2) Women in 2 <sup>nd</sup> social vulnerability index quartile<br>3) Women in 3 <sup>rd</sup> social vulnerability index quartile<br>4) Women in 4 <sup>th</sup> social vulnerability index quartile | Method of diagnosis is unclear.                 |                                                                                                                          |                                |

|                         |                      |                                                       |     |                                                                                                                                                                                                                                                                                                                                                                             |                                                                                                                                                                                             |                                                                                                                                                                                                                                                |                                                                                                |
|-------------------------|----------------------|-------------------------------------------------------|-----|-----------------------------------------------------------------------------------------------------------------------------------------------------------------------------------------------------------------------------------------------------------------------------------------------------------------------------------------------------------------------------|---------------------------------------------------------------------------------------------------------------------------------------------------------------------------------------------|------------------------------------------------------------------------------------------------------------------------------------------------------------------------------------------------------------------------------------------------|------------------------------------------------------------------------------------------------|
| Sharma N, 2021 India    | Prospective cohort   | 125 women<br><br>125 mothers with confirmed COVID-19  |     | All laboratory-confirmed pregnant women admitted to the obstetrics and gynaecology department at a tertiary care centre.<br><br>Universal screening was carried out. Testing was repeated for each patient every 48 hours until two consecutive negative reports were obtained.<br><br>Laboratory-confirmed women referred to the hospital from remote areas were excluded. | Mothers were diagnosed by oropharyngeal swabs at admission.<br><br>Method of diagnosis of newborns is unclear.                                                                              | COVID-related: all-cause mortality, COVID-specific mortality, pneumonia, invasive ventilation, admission to hospital, severe pneumonia, mode of delivery – caesarean section and vaginal                                                       | Stillbirth, foetal distress, APGAR score at 5'                                                 |
| Singh N, 2021 USA       | Retrospective cohort | 100 women<br><br>50 mothers with confirmed COVID-19   | 101 | All laboratory-confirmed women with delivered placentas at one medical centre. Participants were identified via electronic health records.<br><br>Universal screening was carried out.<br><br>2 groups<br>1) SARS-CoV-2 positive cases<br>2) Controls (SARS-CoV-2 negative women)                                                                                           | Mothers were diagnosed by nasopharyngeal swabs at admission to the labour and delivery unit.                                                                                                |                                                                                                                                                                                                                                                |                                                                                                |
| Singh V (1), 2021 India | Retrospective cohort | 2729 women<br><br>132 mothers with confirmed COVID-19 | 125 | All laboratory-confirmed pregnant women admitted to one hospital and their newborns.<br><br>It is unclear how testing was carried out.                                                                                                                                                                                                                                      | Followed diagnostic criteria according to the Indian Council of Medical Research (ICMR) guidelines<br><br>Mothers were diagnosed by RT-PCR or rapid antigen test.<br><br>Method of neonatal | COVID-related: all-cause mortality, pneumonia, invasive and non-invasive respiratory support, admission to ICU, severe pneumonia, septicaemia<br><br>Pregnancy-related: miscarriage, preterm delivery, preterm premature rupture of membranes, | Stillbirth, neonatal death, admission to NICU, neonatal sepsis, APGAR score at 5', birthweight |

|                                                       |                      |                                                                 |     |                                                                                                                                                                                                                                           |                                                                                                 |             |                                                                                                                                                                                                                                               |                                                                                                                     |
|-------------------------------------------------------|----------------------|-----------------------------------------------------------------|-----|-------------------------------------------------------------------------------------------------------------------------------------------------------------------------------------------------------------------------------------------|-------------------------------------------------------------------------------------------------|-------------|-----------------------------------------------------------------------------------------------------------------------------------------------------------------------------------------------------------------------------------------------|---------------------------------------------------------------------------------------------------------------------|
|                                                       |                      |                                                                 |     |                                                                                                                                                                                                                                           | diagnosis is unclear.                                                                           |             | mode of delivery – caesarean section and vaginal, postpartum haemorrhage                                                                                                                                                                      |                                                                                                                     |
| Sung J, 2021 USA                                      | Retrospective cohort | 81 women<br><br>81 mothers with confirmed COVID-19              |     | All laboratory-confirmed pregnant women with available electronic medical records in an urban 3-hospital system.<br><br>It is unclear how testing was carried out.                                                                        | Method of diagnosis is unclear.                                                                 |             |                                                                                                                                                                                                                                               |                                                                                                                     |
| Suyuthi FP, 2021 Indonesia                            | Retrospective cohort | 26 women<br><br>26 mothers with suspected or confirmed COVID-19 | 24  | All pregnant women with COVID-19 admitted to hospital<br><br>It is unclear how testing was carried out                                                                                                                                    | Method of diagnosis is unclear                                                                  |             | COVID-related: all-cause mortality, COVID-specific mortality, pneumonia<br><br>Pregnancy related: induced abortion, preterm birth, gestational diabetes, mode of delivery – caesarean section and vaginal                                     | Stillbirth, APGAR score                                                                                             |
| The WAPM Working Group on COVID-19, 2021 22 countries | Retrospective cohort | 388 women<br><br>388 mothers with confirmed COVID-19            | 257 | All laboratory-confirmed pregnant women with singleton pregnancies in 72 centres around the world, and their newborns.<br><br>It is unclear how testing was carried out.<br><br>2 groups<br>1) Asymptomatic cases<br>2) Symptomatic cases | Mothers were diagnosed by nasopharyngeal swabs.<br><br>Method of neonatal diagnosis is unclear. | Any symptom | COVID-related: all-cause mortality, acute respiratory distress syndrome, invasive ventilation, extracorporeal membrane oxygenation, admission to ICU, acute kidney injury, respiratory failure<br><br>Pregnancy-related: miscarriage, induced | Stillbirth, gestational age at delivery, admission to NICU, neonatal sepsis, small-for-gestational age, birthweight |

|                            |                      |                                                 |     |                                                                                                                                                                                                                                                                                                                                                                          |                                                                                                                                                                                              |
|----------------------------|----------------------|-------------------------------------------------|-----|--------------------------------------------------------------------------------------------------------------------------------------------------------------------------------------------------------------------------------------------------------------------------------------------------------------------------------------------------------------------------|----------------------------------------------------------------------------------------------------------------------------------------------------------------------------------------------|
|                            |                      |                                                 |     | Women with ongoing pregnancies, or who experienced miscarriage, foetal death, termination of pregnancy, or tested positive for COVID-19 before conception or during the postpartum period were excluded.                                                                                                                                                                 | abortion, preterm delivery, spontaneous preterm delivery, mode of delivery - caesarean section and vaginal                                                                                   |
| Trahan MJ (2), 2021 Canada | Retrospective cohort | 206 women<br>43 mothers with confirmed COVID-19 | 209 | All women with laboratory-confirmed COVID-19 during pregnancy who delivered at two hospitals.<br><br>Testing was initially carried out on women at risk (determined via a screening questionnaire). Universal screening subsequently started for all admitted pregnant women.<br><br>2 groups<br>1) SARS-CoV-2 positive cases<br>2) Controls (SARS-CoV-2 negative women) | Method of diagnosis is unclear.                                                                                                                                                              |
| Trejo FAE, 2021 USA        | Retrospective cohort | 33 women<br>33 mothers with confirmed COVID-19  |     | All laboratory-confirmed women with delivered placentas admitted at one centre.<br><br>It is unclear how testing was carried out.                                                                                                                                                                                                                                        | Mothers were diagnosed by serology IgG testing of peripheral blood for SARS-CoV-2 at admission.<br><br>Cord blood was tested for SARS-CoV-2 by serology IgG testing at the time of delivery. |

|                                   |                      |                                                      |     |                                                                                                                                                                                                                                                                                                                                                                                    |                                                 |                                                                |                                                                                                                                                                                                    |                                                                                                             |
|-----------------------------------|----------------------|------------------------------------------------------|-----|------------------------------------------------------------------------------------------------------------------------------------------------------------------------------------------------------------------------------------------------------------------------------------------------------------------------------------------------------------------------------------|-------------------------------------------------|----------------------------------------------------------------|----------------------------------------------------------------------------------------------------------------------------------------------------------------------------------------------------|-------------------------------------------------------------------------------------------------------------|
| Tutiya CT (1), 2021 Brazil        | Retrospective cohort | 114 women<br><br>114 mothers with confirmed COVID-19 |     | All laboratory-confirmed pregnant women who presented at a hospital's obstetric emergency department for any reason.<br><br>Testing was carried out on women with clinical suspicion.<br><br>2 groups<br>1) women with non-severe COVID-19 disease<br>2) women with severe COVID-19 disease<br><br>Women with clinical suspicion but a negative test for SARS-CoV-2 were excluded. | Mothers were diagnosed by nasopharyngeal swabs. | Parity, chronic hypertension                                   | COVID-related: severe pneumonia                                                                                                                                                                    |                                                                                                             |
| ROUND 23                          |                      |                                                      |     |                                                                                                                                                                                                                                                                                                                                                                                    |                                                 |                                                                |                                                                                                                                                                                                    |                                                                                                             |
| Abedzadeh-Kalahroudi M, 2021 Iran | Prospective cohort   | 150 women<br><br>56 mothers with confirmed COVID-19  | 150 | All pregnant women with COVID-19 admitted to Shahid Beheshti Hospital and pregnant women admitted to the midwifery clinics for prenatal care.<br><br>Testing was carried out on symptomatic patients.                                                                                                                                                                              | Mothers were diagnosed by RT-PCRs.              | Diabetes, chronic hypertension, pre-eclampsia, obesity, parity | COVID-related: all-cause mortality, invasive ventilation, admission to ICU, coagulopathy<br><br>Pregnancy-related: miscarriage, preterm delivery, mode of delivery – caesarean section and vaginal | Stillbirth, neonatal death, gestational age at delivery, admission to NICU, neonatal sepsis, fetal distress |
| Ansari A, 2020 Pakistan           | Prospective cohort   | 525 women<br><br>43 mothers with confirmed COVID-19  |     | All consecutive patients attending the Obstetrics and Gynaecology department of CMH Rawalpindi.<br><br>Universal screening was carried out.<br><br>Non-pregnant patients and those during the first trimester were excluded.                                                                                                                                                       | Mothers were diagnosed by RT-PCRs.              |                                                                |                                                                                                                                                                                                    |                                                                                                             |

|                           |                      |                                                                                 |                                                                                                                                                                                                                                                                                                                                                                                                                                                                                          |                                                                                                       |                                                                                                                                             |                                                               |
|---------------------------|----------------------|---------------------------------------------------------------------------------|------------------------------------------------------------------------------------------------------------------------------------------------------------------------------------------------------------------------------------------------------------------------------------------------------------------------------------------------------------------------------------------------------------------------------------------------------------------------------------------|-------------------------------------------------------------------------------------------------------|---------------------------------------------------------------------------------------------------------------------------------------------|---------------------------------------------------------------|
| Anuk TA, 2021<br>Turkey   | Prospective cohort   | 70 women<br><br>30<br>mothers<br>with<br>confirmed<br>COVID-<br>19              | All pregnant women aged<br>between 18 and 40 years<br>with a singleton pregnancy<br>and a gestational age<br>between 23 and 40 weeks.<br><br>It is unclear how testing was<br>carried out.<br><br>Women with pregestational<br>and gestational diabetes<br>mellitus, chronic<br>hypertension, intrauterine<br>fetal demise, twin pregnancy,<br>placental abruption (partial<br>and complete), autoimmune<br>diseases, clinical<br>hypothyroidism or<br>hyperthyroidism were<br>excluded. | Mothers were<br>diagnosed by RT-<br>PCRs.                                                             | COVID-related:<br>admission to ICU<br><br>Pregnancy-related:<br>preterm delivery,<br>mode of delivery –<br>caesarean section and<br>vaginal | Stillbirth, fetal<br>growth<br>restriction, fetal<br>distress |
| Behrens E, 2020<br>USA    | Retrospective cohort | 43 women<br><br>43<br>mothers<br>with<br>confirmed<br>COVID-<br>19              | All admitted pregnant and<br>postpartum COVID-19<br>patients.<br><br>It is unclear how testing was<br>carried out.                                                                                                                                                                                                                                                                                                                                                                       | Method of<br>diagnosis is<br>unclear.                                                                 | COVID-related:<br>thromboembolic<br>complication, acute<br>cardiac, renal or<br>hepatic injury                                              |                                                               |
| Carrasco I, 2020<br>Spain | Prospective cohort   | 105 women<br><br>107<br><br>105<br>mothers<br>with<br>confirmed<br>COVID-<br>19 | All women with confirmed<br>COVID-19 infection.<br><br>It is unclear how testing was<br>carried out.                                                                                                                                                                                                                                                                                                                                                                                     | Mothers were<br>diagnosed by RT-<br>PCRs.<br><br>Newborns were<br>diagnosed by RT-<br>PCR at 15 days. |                                                                                                                                             |                                                               |



|                                                                                                                                                                                                                                                                                    |                      |                                                  |     |                                                                                                                                                                                                                                                                                                                                                                         |                                                                                                             |                   |                                                                                                                                                                                                                                                   |
|------------------------------------------------------------------------------------------------------------------------------------------------------------------------------------------------------------------------------------------------------------------------------------|----------------------|--------------------------------------------------|-----|-------------------------------------------------------------------------------------------------------------------------------------------------------------------------------------------------------------------------------------------------------------------------------------------------------------------------------------------------------------------------|-------------------------------------------------------------------------------------------------------------|-------------------|---------------------------------------------------------------------------------------------------------------------------------------------------------------------------------------------------------------------------------------------------|
| Celik T, 2021<br>Turkey                                                                                                                                                                                                                                                            | Prospective cohort   | 73 women<br>37 mothers with confirmed COVID-19   | 73  | All mothers with infants with type A tympanogram, normal neonatal hearing screening ABR bilaterally, and no additional disease.<br><br>It is unclear how testing was carried out.                                                                                                                                                                                       | Method of diagnosis is unclear.                                                                             |                   | COVID-related:<br>admission to ICU and hospital<br><br>Pregnancy-related:<br>mode of delivery – caesarean and vaginal                                                                                                                             |
| Cosma S (3), 2021<br>Italy                                                                                                                                                                                                                                                         | Prospective cohort   | 164 women<br>17 mothers with confirmed COVID-19  |     | Consecutive 12-week pregnant patients attending the institution for non-invasive prenatal diagnosis or admitted to care units for obstetric or COVID-19 related symptoms.<br><br>It is unclear how testing was carried out.<br><br>Women who were scheduled to deliver at another hospital, unable to give informed consent, and aged under 18 years old were excluded. | Mothers were diagnosed by RT-PCRs.                                                                          | Age, BMI, smoking | COVID-related:<br>pneumonia, admission to hospital<br><br>Pregnancy-related:<br>miscarriage                                                                                                                                                       |
| D'Antonio F, 2021<br>Argentina,<br>Australia, Belgium, Brazil,<br>Colombia, Czech Republic,<br>Finland, Germany, Greece,<br>Israel, Italy, North<br>Macedonia, Peru, Portugal,<br>Republic of Kosovo,<br>Romania, Russia, Serbia,<br>Slovenia, Spain, Turkey, and<br>United States | Retrospective cohort | 887 women<br>887 mothers with confirmed COVID-19 | 865 | All pregnant women with laboratory-confirmed COVID-19.<br><br>Testing was carried out on symptomatic patients.                                                                                                                                                                                                                                                          | Mothers were diagnosed by RT-PCRs.<br><br>Newborns diagnosed by RT-PCR usually within 24 hours of delivery. |                   | COVID-related: all-cause mortality, invasive ventilation, admission to ICU and hospital, severe covid, acute, cardiac, renal, hepatic injury<br><br>Pregnancy-related:<br>miscarriage, preterm delivery, mode of delivery – caesarean and vaginal |

|                              |                      |                                                        |  |                                                                                                                                                                  |                                                       |                                                                                                                                                                           |                            |
|------------------------------|----------------------|--------------------------------------------------------|--|------------------------------------------------------------------------------------------------------------------------------------------------------------------|-------------------------------------------------------|---------------------------------------------------------------------------------------------------------------------------------------------------------------------------|----------------------------|
| D'Ambrosi F, 2021<br>Italy   | Prospective cohort   | 896 women<br><br>50 mothers with confirmed COVID-19    |  | All pregnant women admitted for pregnancy-related health care.<br><br>Universal screening was carried out.                                                       | Mothers were diagnosed by nasopharyngeal swabs.       |                                                                                                                                                                           |                            |
| Dingom MAN, 2020<br>Cameroon | Prospective cohort   | 25 women 9<br><br>25 mothers with confirmed COVID-19   |  | All symptomatic pregnant women with COVID-19.<br><br>Testing was carried out on symptomatic patients.                                                            | Mothers were diagnosed by either RT-PCRs or serology. | COVID-related: all-cause mortality, ARDS, admission to ICU<br><br>Pregnancy-related: induced abortion, preterm delivery, mode of delivery – caesarean section and vaginal | Fetal distress, stillbirth |
| Dubelbeiss E, 2021<br>USA    | Retrospective cohort | 1257 women<br><br>45 mothers with confirmed COVID-19   |  | All women admitted to L&D of Einstein Medical Center Philadelphia for delivery who agreed to testing for SARS-CoV-2.<br><br>Universal screening was carried out. | Mothers were diagnosed by RT-PCRs.                    |                                                                                                                                                                           |                            |
| Galang RR (1), 2021<br>USA   | Retrospective cohort | 5963 women<br><br>5963 mothers with confirmed COVID-19 |  | All pregnant women with confirmed COVID-19 infection who were reported as part of SET-NET.<br><br>It is unclear how testing was carried out.                     | Method of diagnosis is unclear.                       | Age, ethnicity, gestational diabetes, COPD, any co-morbidity, chronic hypertension, pregnancy induced hypertension, obesity, 3 <sup>rd</sup> trimester                    |                            |

|                                             |                      |                                                                                                                    |                                                                                                                                                    |                                    |                                                                                                            |                                                                                                                                                                                                                       |
|---------------------------------------------|----------------------|--------------------------------------------------------------------------------------------------------------------|----------------------------------------------------------------------------------------------------------------------------------------------------|------------------------------------|------------------------------------------------------------------------------------------------------------|-----------------------------------------------------------------------------------------------------------------------------------------------------------------------------------------------------------------------|
| Gobierno de Mexico (December update) Mexico | Prospective cohort   | 31253 women<br><br>11512 mothers with suspected or confirmed COVID-19<br><br>10505 mothers with confirmed COVID-19 | All pregnant and postpartum women diagnosed with COVID-19 (including confirmed cases) who were followed-up and reported by the Mexican government. | Method of diagnosis is unclear.    |                                                                                                            | COVID-related: all-cause mortality, invasive ventilation, admission to ITU, admission to hospital, severe COVID                                                                                                       |
| Gold S (2), 2021 USA                        | Retrospective cohort | 144 women<br><br>144 mothers with confirmed COVID-19                                                               | All pregnant women delivering at six hospitals with COVID-19.<br><br>Universal screening was carried out.                                          | Method of diagnosis is unclear.    | Age, ethnicity, smoking, asthma, diabetes, gestational diabetes, BMI, parity, gestational age, any symptom | COVID-related: pneumonia, ECMO, admission to hospital, oxygenation<br><br>Pregnancy-related: preterm delivery, preterm-premature rupture of membranes, gestational diabetes, chorioamnionitis, postpartum haemorrhage |
| Halici-Ozturk F, 2021 Turkey                | Prospective cohort   | 210 women<br><br>24 mothers with confirmed COVID-19                                                                | All women with early pregnancy loss who attended the perinatology clinic in Ankara City Hospital.<br><br>Universal screening was carried out.      | Mothers were diagnosed by RT-PCRs. | Age, smoking, any co-morbidity, obesity, parity, lymphopenia, any symptom                                  | COVID-related: all-cause mortality, respiratory failure, admission to ICU, severe COVID                                                                                                                               |

|                                 |                      |                                                                                                                                             |    |                                                                                                                                                                                                                        |                                    |                                                                                                                                                                                                                             |                                                                        |
|---------------------------------|----------------------|---------------------------------------------------------------------------------------------------------------------------------------------|----|------------------------------------------------------------------------------------------------------------------------------------------------------------------------------------------------------------------------|------------------------------------|-----------------------------------------------------------------------------------------------------------------------------------------------------------------------------------------------------------------------------|------------------------------------------------------------------------|
| Jiménez-Lozano I, 2021<br>Spain | Retrospective cohort | 12 women<br>12<br>mothers<br>with<br>confirmed<br>COVID-<br>19                                                                              | 12 | All pregnant women treated with tocilizumab at two hospitals.<br><br>It is unclear how testing was carried out.                                                                                                        | Mothers were diagnosed by RT-PCRs. | COVID-related: invasive ventilation, oxygenation, admission to ICU, admission to hospital, preterm delivery, gestational diabetes, mode of delivery – caesarean section and vaginal                                         | Stillbirth, neonatal death, admission to NICU, congenital malformation |
| Kuzan TY, 2021<br>Turkey        | Retrospective cohort | 55 women<br>55<br>mothers<br>with<br>suspected<br>or<br>confirmed<br>COVID-<br>19<br><br>53<br>mothers<br>with<br>confirmed<br>COVID-<br>19 |    | All symptomatic pregnant women who were suspected with COVID-19.<br><br>Testing was carried out on symptomatic patients.<br><br>Patients who were tested for infection for universal screening purposes were excluded. | Mothers were diagnosed by RT-PCRs. | COVID-related: all-cause mortality, ARDS, invasive ventilation, admission to ICU, severe COVID<br><br>Pregnancy-related: miscarriage in first trimester, preterm delivery, mode of delivery – caesarean section and vaginal |                                                                        |
| Levitan D, 2021<br>USA          | Retrospective cohort | 150 women<br>65<br>mothers<br>with<br>confirmed<br>COVID-<br>19                                                                             |    | All women who had their placentas sent for pathological evaluation.<br><br>Universal screening was carried out.                                                                                                        | Mothers were diagnosed by RT-PCRs. | COVID-related: severe COVID, acute cardiac, renal, or hepatic injury<br><br>Pregnancy-related: preterm delivery, mode of delivery – caesarean section and vaginal, chorioamnionitis                                         | Stillbirth                                                             |
| Lokken EM (2), 2021<br>USA      | Retrospective cohort | 17233 women<br>240<br>mothers<br>with<br>confirmed<br>COVID-<br>19                                                                          |    | All pregnant women with COVID-19 in 35 hospitals and clinic systems in Washington State.<br><br>Universal screening was carried out.                                                                                   | Mothers were diagnosed by RT-PCRs. |                                                                                                                                                                                                                             |                                                                        |

|                                    |                      |                                                          |     |                                                                                                                                                              |                                                                                                                                      |                  |                                                                                                                                                                                                              |                                                               |
|------------------------------------|----------------------|----------------------------------------------------------|-----|--------------------------------------------------------------------------------------------------------------------------------------------------------------|--------------------------------------------------------------------------------------------------------------------------------------|------------------|--------------------------------------------------------------------------------------------------------------------------------------------------------------------------------------------------------------|---------------------------------------------------------------|
| Lopez M (1), 2020<br>Spain         | Prospective cohort   | 21 women<br><br>21 mothers with confirmed COVID-19       | 21  | Consecutive pregnant women with confirmed COVID-19 who delivered in BCNatal.<br><br>It is unclear how testing was carried out.                               | Mothers were diagnosed by RT-PCRs.                                                                                                   |                  | COVID-related: all-cause mortality, ARDS, oxygenation, invasive ventilation, thromboembolic complication, severe COVID, acute cardiac, renal, or hepatic injury, septicaemia                                 |                                                               |
| Mancilla-Galindo J, 2021<br>Mexico | Retrospective cohort | 131064 women<br><br>686 mothers with confirmed COVID-19  |     | All patients who received medical attention in any accredited COVID-19 medical units in Mexico City.<br><br>Testing was carried out on symptomatic patients. | Mothers were diagnosed by RT-PCRs.                                                                                                   |                  |                                                                                                                                                                                                              |                                                               |
| Mejia I, 2020<br>Spain             | Prospective cohort   | 403 women<br><br>403 mothers with confirmed COVID-19     | 403 | All pregnant women with COVID-19 in the Spanish Registry of COVID-19.<br><br>It is unclear how testing was carried out.                                      | Mothers were diagnosed by RT-PCRs.<br><br>Newborns were diagnosed by 2 RT-PCRs, the first one occurring within 12 hours of delivery. |                  |                                                                                                                                                                                                              |                                                               |
| Money D (2), 2021<br>Canada        | Prospective cohort   | 137942 women<br><br>1880 mothers with confirmed COVID-19 | 738 | All pregnant women with COVID-19 reported by provincial public health agencies.<br><br>It is unclear how testing was carried out.                            | Mothers were diagnosed by RT-PCRs.                                                                                                   | Pregnancy status | COVID-related: pneumonia, invasive ventilation, oxygenation, admission to ICU, admission to hospital<br><br>Pregnancy-related: preterm delivery, spontaneous preterm delivery – caesarean section or vaginal | Stillbirth, admission to NICU, abnormal APGAR score 5 minutes |

|                                        |                      |                                                         |        |                                                                                                                                                                                                                                                                             |                                                                                                                                                                                                                        |                                                                                                                      |                                                                                                                                                                                                      |                                                                                                  |
|----------------------------------------|----------------------|---------------------------------------------------------|--------|-----------------------------------------------------------------------------------------------------------------------------------------------------------------------------------------------------------------------------------------------------------------------------|------------------------------------------------------------------------------------------------------------------------------------------------------------------------------------------------------------------------|----------------------------------------------------------------------------------------------------------------------|------------------------------------------------------------------------------------------------------------------------------------------------------------------------------------------------------|--------------------------------------------------------------------------------------------------|
| Nakamura-Pereira M (3), 2020<br>Brazil | Retrospective cohort | 4769 women<br><br>4769 mothers with confirmed COVID-19  |        | All pregnant and postpartum women in the Brazilian Official Acute Respiratory Syndrome Surveillance System who had a diagnosis of COVID-19 or closed as “undetermined etiology”.<br><br>It is unclear how testing was carried out.                                          | Method of diagnosis is unclear.                                                                                                                                                                                        |                                                                                                                      | COVID-related: all-cause mortality                                                                                                                                                                   |                                                                                                  |
| Ngalame AN, 2020<br>Cameroon           | Prospective cohort   | 301 women<br><br>18 mothers with confirmed COVID-19     | 13     | All pregnant or postpartum patients consulted at the Douala Gyneco-Obstetric and Pediatric Hospital with confirmed or suspected COVID-19 for whom data was available.<br><br>It is unclear how testing was carried out.                                                     | Followed diagnostic criteria according to the Douala Gyneco-Obstetric and Pediatric Hospital.<br><br>Mothers were diagnosed by any of RT-PCRs, rapid diagnostic tests, or ground glass opacification on chest CT scan. |                                                                                                                      | COVID-related: all-cause mortality, admission to ICU<br><br>Pregnancy-related: preterm delivery, mode of delivery – caesarean section and vaginal                                                    | Neonatal death, admission to NICU                                                                |
| Ona S (1), 2021<br>USA                 | Retrospective cohort | 316 women<br><br>60 mothers with confirmed COVID-19     |        | All women with singleton pregnancies presenting for anatomical survey between 16 and 24 weeks and delivering at a single-institution in NYC.<br><br>Universal screening was carried out.                                                                                    | Mothers were diagnosed by RT-PCRs or IgG serology.                                                                                                                                                                     | Age, ethnicity, asthma, diabetes, gestational diabetes, pregnancy induced hypertension, BMI, parity, gestational age | Severe COVID<br><br>Pregnancy-related: preterm delivery, spontaneous preterm delivery, preterm-premature rupture of membranes, gestational diabetes,                                                 |                                                                                                  |
| Overtoom EM, 2020<br>Netherlands       | Prospective cohort   | 183725 women<br><br>312 mothers with confirmed COVID-19 | 183550 | All pregnant and postpartum (up to 42 days) women with COVID-19 reported to the Netherlands Obstetric Surveillance System. Control group of pregnant women included pregnant women in the Dutch Perinatal Registry.<br><br>Testing was carried out on symptomatic patients. | Mothers were diagnosed by RT-PCRs or serology.                                                                                                                                                                         | Age, ethnicity, smoking, diabetes, obesity, multiple pregnancy, parity                                               | COVID-related: all-cause mortality, pneumonia, invasive ventilation, admission to ICU, admission to hospital,<br><br>Pregnancy-related: miscarriage in first and second trimester, preterm delivery, | Stillbirth, neonatal death, admission to NICU, abnormal APGAR score at 5 minutes, fetal distress |

|                         |                      |                                                 |    |                                                                                                                                                                                                                                       |                                    |                                              |                                                                                                                                                                |                                                   |
|-------------------------|----------------------|-------------------------------------------------|----|---------------------------------------------------------------------------------------------------------------------------------------------------------------------------------------------------------------------------------------|------------------------------------|----------------------------------------------|----------------------------------------------------------------------------------------------------------------------------------------------------------------|---------------------------------------------------|
|                         |                      |                                                 |    |                                                                                                                                                                                                                                       |                                    |                                              | mode of delivery – caesarean section and vaginal                                                                                                               |                                                   |
| Polat I, 2020<br>Turkey | Retrospective cohort | 40 women<br>40 mothers with confirmed COVID-19  | 40 | Pregnant women aged between 18-45 years old with COVID-19.<br><br>Universal screening was carried out.<br><br>Patients who used systemic drugs, have endocrine and/or autoimmune disorders, or underlying lung disease were excluded. | Mothers were diagnosed by RT-PCRs. |                                              | COVID-related: all-cause mortality, oxygenation, admission to ICU<br><br>Pregnancy-related: preterm delivery, mode of delivery – caesarean section and vaginal | Neonatal death, admission to NICU, fetal distress |
| Rizzo G, 2021<br>Italy  | Prospective cohort   | 147 women<br>49 mothers with confirmed COVID-19 |    | Consecutive women with singleton pregnancies that had received antenatal care and delivered at Division of Maternal Fetal Medicine, Università di Roma Tor Vergata.<br><br>It is unclear how testing was carried out.                 | Mothers were diagnosed by RT-PCRs. | Age, ethnicity, BMI, parity, gestational age | COVID-related: admission to hospital                                                                                                                           |                                                   |
| Scott R, 2020<br>UK     | Retrospective cohort | 593 women<br>18 mothers with confirmed COVID-19 |    | All women under maternity services that were tested for COVID-19.<br><br>Universal screening was carried out.                                                                                                                         | Mothers were diagnosed by RT-PCRs. |                                              |                                                                                                                                                                |                                                   |

|                         |                                  |                                                  |      |                                                                                                                                                                                                                                                                                                                                                                                                                                                                                             |                                                                                                   |                                                                                                         |                                                                                                                                                                                                   |                                                                                                  |
|-------------------------|----------------------------------|--------------------------------------------------|------|---------------------------------------------------------------------------------------------------------------------------------------------------------------------------------------------------------------------------------------------------------------------------------------------------------------------------------------------------------------------------------------------------------------------------------------------------------------------------------------------|---------------------------------------------------------------------------------------------------|---------------------------------------------------------------------------------------------------------|---------------------------------------------------------------------------------------------------------------------------------------------------------------------------------------------------|--------------------------------------------------------------------------------------------------|
| Sharma R, 2021<br>India | Retrospective/Prospective cohort | 41 women<br>41 mothers with confirmed COVID-19   | 44   | All confirmed COVID-19 pregnant patients in the second and third trimester.<br><br>Universal screening was carried out.                                                                                                                                                                                                                                                                                                                                                                     | Mothers were diagnosed by RT-PCRs.<br><br>Newborns were diagnosed by RT-PCR at 24 hours of birth, |                                                                                                         | COVID-related: all-cause mortality, acute cardiac, renal or hepatic injury<br><br>Pregnancy-related: preterm delivery, mode of delivery – caesarean section, vaginal delivery                     | Stillbirth, neonatal death, admission to NICU, abnormal APGAR score at 5 minutes, fetal distress |
| Steffen HA, 2021<br>USA | Prospective cohort               | 1000 women<br>61 mothers with confirmed COVID-19 | 1036 | All pregnant patients who delivered at University of Iowa Hospitals and Clinics.<br><br>Universal screening was carried out.                                                                                                                                                                                                                                                                                                                                                                | Mothers were diagnosed by RT-PCRs.                                                                | Age, ethnicity, gestational age, asthma, pregnancy induced hypertension, pre-eclampsia, BMI             | COVID-related: all-cause mortality, oxygenation, ECMO, admission to ICU, severe COVID, acute cardiac, renal or hepatic injury<br><br>Pregnancy-related: chorioamnionitis, post-partum haemorrhage | Stillbirth, neonatal death, neonatal sepsis, congenital malformation                             |
| Yarra S, 2020<br>USA    | Retrospective cohort             | 17 women<br>17 mothers with confirmed COVID-19   | 17   | All symptomatic pregnant women in the third trimester who delivered at Flushing Hospital Medical Center.<br><br>Testing was carried out on symptomatic patients.<br><br>Women who were diagnosed with COVID-19 post discharge, women who underwent induction of labour at less than 37 weeks gestation, patients with risk factors for entering preterm labour such as a history of preterm labour, women with a history of short cervix, and multiple gestation pregnancies were excluded. | Mothers were diagnosed by RT-PCRs.                                                                | Age, diabetes, chronic hypertension, asthma, BMI, parity, gestational age, fever, cough, breathlessness |                                                                                                                                                                                                   |                                                                                                  |



|                              |                      |                                                       |    |                                                                                                                                                                                                                                                                       |                                                                                                 |                                                                                                                                                                                       |                                                                                |
|------------------------------|----------------------|-------------------------------------------------------|----|-----------------------------------------------------------------------------------------------------------------------------------------------------------------------------------------------------------------------------------------------------------------------|-------------------------------------------------------------------------------------------------|---------------------------------------------------------------------------------------------------------------------------------------------------------------------------------------|--------------------------------------------------------------------------------|
| Zhang P, 2021<br>USA         | Retrospective cohort | 219 women<br><br>142 mothers with confirmed COVID-19  |    | All women who were delivered in the New York Presbyterian hospitals with symptom data available.<br><br>Universal screening was carried out.                                                                                                                          | Mothers were diagnosed by RT-PCRs.                                                              | COVID-related: pneumonia<br><br>Pregnancy-related: gestational diabetes, mode of delivery – caesarean section and vaginal, chorioamnionitis                                           | Fetal growth restriction, admission to NICU, abnormal APGAR score at 5 minutes |
| ROUND 24                     |                      |                                                       |    |                                                                                                                                                                                                                                                                       |                                                                                                 |                                                                                                                                                                                       |                                                                                |
| Cubas JAC (1), 2020<br>Peru  | Retrospective cohort | 13 women<br><br>13 mothers with confirmed COVID-19    | 13 | All pregnant women with COVID admitted at Hospital COVID-19 Simón Bolívar.<br><br>It is unclear how testing was carried out.                                                                                                                                          | Mothers were diagnosed by IgM/IgG serological test for SARS-CoV-2.                              | COVID-related: admission to ICU, severe COVID<br><br>Pregnancy related: preterm delivery, mode of delivery – caesarean section and vaginal, PPH, urinary tract infection              | Stillbirth, neonatal death, Apgar score at 5 minutes, birthweight              |
| Grados IZ, 2021<br>Peru      | Retrospective cohort | 671 women<br><br>317 mothers with confirmed COVID-19  |    | All pregnant and puerperal women with COVID-19 admitted at the Gynaecology and Obstetrics department of Daniel Alcides Carrion National Hospital.<br><br>Universal screening was carried out.                                                                         | Mothers were diagnosed by RT-PCR on respiratory samples or IgM serological test for SARS-CoV-2. | COVID-related: all-cause mortality, admission to ICU, severe COVID<br><br>Pregnancy related: preterm delivery, gestational diabetes, mode of delivery – caesarean section and vaginal | Stillbirth, foetal growth restriction, foetal distress                         |
| Guevara-Rios E, 2021<br>Peru | Retrospective cohort | 2419 women<br><br>170 mothers with confirmed COVID-19 |    | All pregnant women admitted to the National Maternal Perinatal Institute of Peru, who had SARS-CoV-2 antibodies serological test results.<br><br>Universal screening was carried out.<br><br>3 groups<br>1) Positive IgM anti-SARS-CoV-2 antibodies in pregnant women | Mothers were diagnosed by IgM/IgG serological test for SARS-CoV-2.                              |                                                                                                                                                                                       |                                                                                |

|                             |                      |            |     |                                                                                                                                                                                                                                                                                                                                                                                                                                                                                                                                                                                                                                                                         |                                                 |             |                                                                                       |                                                                                                 |
|-----------------------------|----------------------|------------|-----|-------------------------------------------------------------------------------------------------------------------------------------------------------------------------------------------------------------------------------------------------------------------------------------------------------------------------------------------------------------------------------------------------------------------------------------------------------------------------------------------------------------------------------------------------------------------------------------------------------------------------------------------------------------------------|-------------------------------------------------|-------------|---------------------------------------------------------------------------------------|-------------------------------------------------------------------------------------------------|
|                             |                      |            |     | <p>2) Positive IgG/IgM anti-SARS-CoV-2 antibodies in pregnant women</p> <p>3) Positive IgG anti-SARS-CoV-2 antibodies in pregnant women</p> <p>Women with under-registration of the study variables in the medical record, and missing results for the requested serological tests were excluded.</p>                                                                                                                                                                                                                                                                                                                                                                   |                                                 |             |                                                                                       |                                                                                                 |
| Malhotra Y (2), 2021<br>USA | Retrospective cohort | 1198 women | 290 | <p>All maternal-infant dyads delivered at any of the 11 NYCH + H hospitals that had maternal SARS-CoV-2 testing done prior to or during the delivery criteria.</p> <p>Universal screening was carried out.</p> <p>2 groups</p> <p>1) Maternal SARS-CoV-2 test positive (M-positive)</p> <p>2) Maternal SARS-CoV-2 test negative (M-negative)</p> <p>Exclusion criteria: dyads with mothers only tested outside of the NYC H + H system, dyads with mothers tested within the NYC H + H system but delivered at outside hospitals, patients with missing data were excluded for those specific parameters, dyads tested after discharge from the delivery encounter.</p> | Mothers and newborns were diagnosed by RT-PCRs. | Age, parity | Pregnancy related: preterm delivery, mode of delivery – caesarean section and vaginal | Stillbirth, gestational age at delivery, admission to NICU, length of stay in NICU, birthweight |

|                           |                      |                                                    |    |                                                                                                                                                                                                                                                                                                                                                                                              |                                   |                                                                                                                                                                                        |                                          |
|---------------------------|----------------------|----------------------------------------------------|----|----------------------------------------------------------------------------------------------------------------------------------------------------------------------------------------------------------------------------------------------------------------------------------------------------------------------------------------------------------------------------------------------|-----------------------------------|----------------------------------------------------------------------------------------------------------------------------------------------------------------------------------------|------------------------------------------|
| Murthy S, 2021<br>Canada  | Retrospective cohort | 12 women<br><br>12 mothers with confirmed COVID-19 |    | All pregnant women with confirmed COVID-19 admitted to an ICU in one of 32 hospitals, as well as a quota sampling of up to the first 60 patients admitted to hospital wards.<br><br>It is unclear how testing was carried out.<br><br>2 groups<br>1) Ward patients<br>2) Patients admitted to ICU                                                                                            | Mothers were diagnosed by RT-PCR. |                                                                                                                                                                                        |                                          |
| Patone M, 2021<br>UK      | Retrospective cohort | 36 women<br><br>36 mothers with confirmed COVID-19 |    | All pregnant women admitted for critical care in England with a positive community COVID-19 test.<br><br>It is unclear how testing was carried out.<br><br>2 groups<br>1) Non-VOC B.1.1.7<br>2) VOC B.1.1.7                                                                                                                                                                                  | Mothers were diagnosed by RT-PCR. |                                                                                                                                                                                        |                                          |
| Porpora GM, 2021<br>Italy | Prospective cohort   | 30 women<br><br>30 mothers with confirmed COVID-19 | 30 | All pregnant women with confirmed COVID-19 admitted to the COVID-19 obstetrical ward of the Department of Maternal and Child Health of the Policlinico Umberto I Hospital,<br><br>Universal screening was carried out.<br><br>Exclusion criteria: twin pregnancies, previous SARS-CoV-2 infection, maternal age >45 years, BMI >30, presence of maternal or pregnancy related comorbidities. | Mothers were diagnosed by RT-PCR. | COVID-related: pneumonia, severe COVID, non-invasive and invasive ventilation<br><br>Pregnancy related: preterm delivery, spontaneous preterm delivery – caesarean section and vaginal | Gestational age at delivery, birthweight |

|                            |                      |                                                                          |     |                                                                                                                                                                                                                                                                                                                                    |                                                                                                                                                 |                                                                                                                                                      |                                                                                                                                                                                                                                                |                                                    |
|----------------------------|----------------------|--------------------------------------------------------------------------|-----|------------------------------------------------------------------------------------------------------------------------------------------------------------------------------------------------------------------------------------------------------------------------------------------------------------------------------------|-------------------------------------------------------------------------------------------------------------------------------------------------|------------------------------------------------------------------------------------------------------------------------------------------------------|------------------------------------------------------------------------------------------------------------------------------------------------------------------------------------------------------------------------------------------------|----------------------------------------------------|
| Rosenbloom JI, 2021<br>USA | Retrospective cohort | 1856<br>women<br><br>83<br>mothers<br>with<br>confirmed<br>COVID-<br>19  |     | All pregnant women<br>admitted for delivery at the<br>Barnes-Jewish Hospital.<br><br>Universal screening was<br>carried out.<br><br>2 groups<br>1) COVID-19 positive<br>2) COVID-19 negative                                                                                                                                       | Mothers and<br>newborns were<br>diagnosed by RT-<br>PCR and/or rapid<br>antigen testing.                                                        | Parity, chronic<br>hypertension,<br>diabetes,<br>gestational<br>diabetes, smoking,<br>pregnancy<br>induced<br>hypertension, pre-<br>eclampsia        | COVID-related: time<br>from illness onset to<br>delivery, severe<br>COVID<br><br>Pregnancy related:<br>gestational diabetes,<br>mode of delivery –<br>caesarean section and<br>vaginal, pregnancy-<br>induced hypertension                     | SGA (small-for-<br>gestational age)                |
| Taya RM, 2020<br>Peru      | Retrospective cohort | 247<br>women<br><br>247<br>mothers<br>with<br>confirmed<br>COVID-<br>19  | 230 | All pregnant women with<br>COVID-19 admitted to<br>Edgardo Rebagliati Martins<br>National Hospital.<br><br>It is unclear how testing was<br>carried out.<br><br>4 groups<br>1) Asymptomatic<br>2) Mild<br>3) Moderate<br>4) Severe<br><br>Pregnancies less than 20<br>weeks and epidemiological<br>discharges were excluded.       | Mothers were<br>diagnosed by RT-<br>PCR and<br>IgM/IgG<br>serological test<br>for SARS-CoV-2.<br><br>Newborns were<br>diagnosed by RT-<br>PCRs. | Parity, fever,<br>cough,<br>breathlessness,<br>myalgia, raised<br>white cell count,<br>lymphopenia,<br>raised CRP,<br>abnormal LFT,<br>pre-eclampsia | COVID-related: all-<br>cause mortality,<br>admission to ICU,<br>severe COVID<br><br>Pregnancy related:<br>preterm delivery,<br>spontaneous preterm<br>delivery, mode of<br>delivery – caesarean<br>section and vaginal,<br>placental abruption | Stillbirth, LGA<br>(large-for-<br>gestational age) |
| Vera Loyola EM, 2020 Peru  | Retrospective cohort | 2214<br>women<br><br>345<br>mothers<br>with<br>confirmed<br>COVID-<br>19 | 349 | All pregnant women<br>admitted at the obstetric<br>emergency of Hospital San<br>Bartolome, who had an<br>immunochromatography test<br>for IgM/IgG (rapid test) to<br>determine the seroprevalence<br>of SARS-CoV-19.<br><br>Universal screening was<br>carried out.<br><br>2 groups<br>1) Vaginal delivery<br>2) Caesarean section | Mothers were<br>diagnosed by<br>IgM/IgG<br>serological test<br>for SARS-CoV-2.                                                                  | Age, parity                                                                                                                                          | COVID-related:<br>invasive and non-<br>invasive ventilation,<br>admission to ICU<br><br>Pregnancy related:<br>preterm delivery,<br>mode of delivery –<br>caesarean section and<br>vaginal                                                      | Stillbirth,<br>birthweight                         |

|                               |                      |                                                                                                            |                                                                                                                    |                                                                                                                                                                                          |                                                                                                                                 |                                             |
|-------------------------------|----------------------|------------------------------------------------------------------------------------------------------------|--------------------------------------------------------------------------------------------------------------------|------------------------------------------------------------------------------------------------------------------------------------------------------------------------------------------|---------------------------------------------------------------------------------------------------------------------------------|---------------------------------------------|
| Akbarian-Rad Z, 2021<br>Iran  | Retrospective cohort | 11 women 8<br><br>11 mothers with suspected or confirmed COVID-19<br><br>6 mothers with confirmed COVID-19 | All pregnant women with suspected COVID-19 admitted for delivery<br><br>It is unclear how testing was carried out. | Laboratory-confirmed women were diagnosed by RT-PCR.<br><br>Clinically diagnosed women diagnosed by chest CT imaging.<br><br>Newborns had swabs taken for RT-PCR 24-72 hours after birth | COVID-related: all-cause mortality<br><br>Pregnancy-related: preterm delivery, mode of delivery – caesarean section and vaginal | Neonatal death, gestational age at delivery |
| Asem N, 2021<br>Egypt         | Retrospective cohort | 64 women<br><br>64 mothers with confirmed COVID-19                                                         | All patients referred to 17 COVID-19 hospitals.<br><br>It is unclear how testing was carried out.                  | Mothers were diagnosed by RT-PCRs.                                                                                                                                                       | COVID-related: all-cause mortality                                                                                              |                                             |
| Basu JK, 2021<br>South Africa | Retrospective cohort | 48116 women<br><br>103 mothers with confirmed COVID-19                                                     | All pregnant women with confirmed COVID-19 on COVID registers.<br><br>It is unclear how testing was carried out.   | Method of diagnosis is unclear.                                                                                                                                                          | COVID-related: all-cause mortality                                                                                              |                                             |

|                          |                      |                                                                                                              |  |                                                                                                   |                                                                                                                                                                                                                                                            |                                                                                                                                                                                     |                                                     |
|--------------------------|----------------------|--------------------------------------------------------------------------------------------------------------|--|---------------------------------------------------------------------------------------------------|------------------------------------------------------------------------------------------------------------------------------------------------------------------------------------------------------------------------------------------------------------|-------------------------------------------------------------------------------------------------------------------------------------------------------------------------------------|-----------------------------------------------------|
| Deng Q, 2021<br>China    | Retrospective cohort | 39 women<br><br>39 mothers with suspected or confirmed COVID-19<br><br>29 mothers with confirmed COVID-19    |  | Pregnant women that were admitted with COVID-19<br><br>It is unclear how testing was carried out. | Laboratory-confirmed women were diagnosed by RT-PCR.<br><br>Clinically-diagnosed women were diagnosed by history, symptoms, or imaging                                                                                                                     | Fever, cough, diarrhoea, dyspnoea, any symptom, pregnancy induced hypertension, gestational diabetes, raised WCC, lymphopenia, raised CRP, radiological abnormalities, ground glass |                                                     |
| Ghema K, 2021<br>Morocco | Retrospective cohort | 30 women 30<br><br>30 mothers with suspected or confirmed COVID-19<br><br>29 mothers with confirmed COVID-19 |  | All neonates born to mothers with COVID-19.<br><br>It is unclear how testing was carried out.     | Followed diagnostic criteria according to the National Health Commission.<br><br>Laboratory-confirmed mothers were diagnosed by nasopharyngeal swab.<br><br>Clinically-diagnosed mothers were diagnosed by CT.<br><br>Newborns were diagnosed with RT-PCR. | COVID-related: all-cause mortality, pneumonia, invasive ventilation, admission to ICU<br><br>Pregnancy-related: mode of delivery – caesarean section and vaginal                    | Neonatal death, admission to NICU, neonatal sepsis, |
| Goulding AN, 2021<br>USA | Retrospective cohort | 2378 women<br><br>147 mothers with confirmed COVID-19                                                        |  | All pregnant women undergoing testing.<br><br>Universal screening was carried out.                | Method of diagnosis is unclear.                                                                                                                                                                                                                            |                                                                                                                                                                                     |                                                     |

|                                   |                      |                                                                            |                                                                                                                                            |                                           |                                                                                                                                                             |                                        |
|-----------------------------------|----------------------|----------------------------------------------------------------------------|--------------------------------------------------------------------------------------------------------------------------------------------|-------------------------------------------|-------------------------------------------------------------------------------------------------------------------------------------------------------------|----------------------------------------|
| Hernandez-Cruz RG, 2021<br>Mexico | Retrospective cohort | 1880<br>women<br><br>578<br>mothers<br>with<br>confirmed<br>COVID-<br>19   | All pregnant women<br>attending the hospital.<br><br>Universal screening was<br>carried out.                                               | Mothers were<br>diagnosed with<br>RT-PCR. | Age, diabetes,<br>chronic<br>hypertension,<br>smoking,<br>gestational<br>diabetes, any<br>symptom, cough,<br>fever, dyspnoea,<br>myalgia,<br>diarrhoea, BMI |                                        |
| Janevic T, 2021<br>USA            | Retrospective cohort | 3731<br>women<br><br>210<br>mothers<br>with<br>confirmed<br>COVID-<br>19   | All women admitted for<br>delivery.<br><br>Universal screening was<br>carried out.                                                         | Mothers were<br>diagnosed with<br>RT-PCR. | Age, ethnicity,<br>obesity, parity                                                                                                                          | Pregnancy-related:<br>preterm delivery |
| Kawamura H, 2021<br>Japan         | Prospective cohort   | 150<br>women<br><br>0 mothers<br>with<br>confirmed<br>COVID-<br>19         | Pregnant women who had<br>delivered Fukui Prefecture.<br><br>Universal screening was<br>carried out.                                       | Mothers were<br>diagnosed with<br>RT-PCR. |                                                                                                                                                             |                                        |
| Magnus M, 2021<br>Norway          | Retrospective cohort | 102820<br>women<br><br>708<br>mothers<br>with<br>confirmed<br>COVID-<br>19 | All pregnant women<br>registered in the Norwegian<br>National Population<br>Registry.<br><br>It is unclear how testing was<br>carried out. | Mothers were<br>diagnosed with<br>RT-PCR. |                                                                                                                                                             |                                        |

|                               |                      |                                                      |                                                                                                                                                                                                                    |                                                   |                                                                                                                                                                                                                               |                           |
|-------------------------------|----------------------|------------------------------------------------------|--------------------------------------------------------------------------------------------------------------------------------------------------------------------------------------------------------------------|---------------------------------------------------|-------------------------------------------------------------------------------------------------------------------------------------------------------------------------------------------------------------------------------|---------------------------|
| Nasrallah S, 2021<br>USA      | Prospective cohort   | 35 women<br><br>35 mothers with confirmed COVID-19   | All admitted pregnant women with moderate symptoms of COVID-19.<br><br>Universal screening was carried out.<br><br>Pregnant women that were asymptomatic, or had mild, severe, or critical COVID-19 were excluded. | Mothers were diagnosed with RT-PCR.               | COVID-related: invasive and non-invasive ventilation, oxygenation, coagulopathy, severe, pneumonia<br><br>Pregnancy-related: preterm delivery, spontaneous preterm delivery, mode of delivery – caesarean section and vaginal | Foetal growth restriction |
| Preis H, 2021<br>USA          | Prospective cohort   | 23 women<br><br>23 mothers with confirmed COVID-19   | Pregnant women recruited to the COVID-19 Pregnancy Experiences Study that had given birth.<br><br>It is unclear how screening was carried out.                                                                     | Mothers were diagnosed by RT-PCR or serology.     | Pregnancy-related: preterm delivery                                                                                                                                                                                           | Small for gestational age |
| Tanacan A (1), 2021<br>Turkey | Prospective cohort   | 105 women<br><br>105 mothers with confirmed COVID-19 | Admitted pregnant women diagnosed with COVID-19.<br><br>It is unclear how screening was carried out.<br><br>Patients with RT-PCR test results at other health-care facilities were excluded.                       | Mothers were diagnosed by RT-PCR.                 |                                                                                                                                                                                                                               |                           |
| Xu R, 2021<br>UK              | Retrospective cohort | 457 women<br><br>1 mother with confirmed COVID-19    | All admitted women were offered nasopharyngeal and oropharyngeal swabs.<br><br>Universal screening was carried out.                                                                                                | Mothers were diagnosed with SAMBA II PCR testing. |                                                                                                                                                                                                                               |                           |

ROUND 26



|                                     |                      |                                                     |     |                                                                                                                                                                                                                                                                                                                                                                                                                                   |                                                                 |                                                                                      |                                                                                                                                                                                                                    |                                             |
|-------------------------------------|----------------------|-----------------------------------------------------|-----|-----------------------------------------------------------------------------------------------------------------------------------------------------------------------------------------------------------------------------------------------------------------------------------------------------------------------------------------------------------------------------------------------------------------------------------|-----------------------------------------------------------------|--------------------------------------------------------------------------------------|--------------------------------------------------------------------------------------------------------------------------------------------------------------------------------------------------------------------|---------------------------------------------|
| Abdulghani SH, 2021<br>Saudi Arabia | Retrospective cohort | 62 women<br><br>62 mothers with confirmed COVID-19  | 63  | All pregnant women admitted to the labour unit with a positive COVID-19 result within 48 hours of delivery<br><br>Universal screening was carried out                                                                                                                                                                                                                                                                             | Mothers were diagnosed by 2 nasopharyngeal swabs 24 hours apart | Age, BMI, gestational age, any symptom                                               | COVID-related: admission to ICU<br><br>Pregnancy-related: preterm delivery, mode of delivery - caesarean section and vaginal, postpartum haemorrhage                                                               | Gestational age                             |
| Ansari A (1), 2020<br>Pakistan      | Prospective cohort   | 881 women<br><br>41 mothers with confirmed COVID-19 | 34  | All pregnant women admitted to the obstetric units of 2 military hospitals<br><br>Universal screening was carried out<br><br>Pregnant women with presumed COVID but negative RT-PCR tests were excluded                                                                                                                                                                                                                           | Mothers were diagnosed by RT-PCRs                               | Asthma, chronic hypertension, any comorbidity, fever, cough, myalgia, breathlessness | COVID-related: all-cause mortality, COVID-specific mortality, invasive ventilation, oxygenation, acute cardiac injury<br><br>Pregnancy-related: preterm delivery, mode of delivery - caesarean section and vaginal | Stillbirth, admission to neonatal unit      |
| Beharier O, 2021<br>Israel          | Prospective cohort   | 232 women<br><br>74 mothers with confirmed COVID-19 | 231 | All pregnant women admitted to the Labour and Delivery units of eight medical centres in Israel<br><br>It is unclear how testing was carried out<br><br>3 groups:<br>1) Pregnant vaccine recipients<br>2) Pregnant unvaccinated women with past COVID-19 positive result<br>3) Pregnant unvaccinated women without prior COVID-19 infection<br><br>Pregnant women with active maternal COVID-19 at delivery disease were excluded | Mothers were diagnosed by nasopharyngeal swabs                  | Age, gestational age, BMI, chronic hypertension, asthma, smoking                     | Pregnancy-related: preterm delivery, preterm-premature rupture of membranes, gestational diabetes, gestational hypertension                                                                                        | Gestational age, admission to neonatal unit |

|                                           |                      |                                                          |      |                                                                                                                                                |                                                |                                                                                                                                                                                                                                                |                                                                                                                            |
|-------------------------------------------|----------------------|----------------------------------------------------------|------|------------------------------------------------------------------------------------------------------------------------------------------------|------------------------------------------------|------------------------------------------------------------------------------------------------------------------------------------------------------------------------------------------------------------------------------------------------|----------------------------------------------------------------------------------------------------------------------------|
| Belokrinskaya TE (2), 2021<br>Russia      | Retrospective cohort | 143010 women<br><br>8485 mothers with confirmed COVID-19 | 2403 | All registered pregnant women in the Far Eastern and Siberian Federal Districts<br><br>Universal screening was carried out                     | Mothers were diagnosed by nasopharyngeal swabs | COVID-related: all-cause mortality, pneumonia, respiratory failure, invasive ventilation, coagulopathy, admission to ICU, severe pneumonia<br><br>Pregnancy related: preterm delivery, mode of delivery - caesarean section and vaginal        | Stillbirth, neonatal death                                                                                                 |
| Bordt EA, 2021<br>USA                     | Prospective cohort   | 68 women<br><br>38 mothers with confirmed COVID-19       | 68   | All pregnant women at two tertiary care centres in Boston over 18 years old and at risk of COVID-19<br><br>Universal screening was carried out | Mothers were diagnosed by nasopharyngeal swabs |                                                                                                                                                                                                                                                |                                                                                                                            |
| Dawood MI, 2021<br>Iraq                   | Prospective cohort   | 100 women<br><br>100 mothers with confirmed COVID-19     |      | All pregnant women diagnosed with COVID-19 at Al-Fallujah Teaching Hospital                                                                    | Mothers were diagnosed by nasopharyngeal swabs | Pregnancy-related: miscarriage, preterm delivery                                                                                                                                                                                               |                                                                                                                            |
| de Vasconcelos Gaspar A, 2021<br>Portugal | Retrospective cohort | 1962 women<br><br>12 mothers with confirmed COVID-19     | 12   | All pregnant women with confirmed COVID-19 on admission<br><br>Testing was carried out on symptomatic patients                                 | Mothers were diagnosed by nasopharyngeal swabs | COVID-related: all-cause mortality, COVID-specific mortality, oxygenation, non-invasive ventilation, admission to ICU, severe pneumonia<br><br>Pregnancy-related: preterm delivery, spontaneous preterm delivery, preterm-premature rupture of | Stillbirth, foetal growth restriction, gestational age, congenital malformation, Apgar score at 5 minutes, foetal distress |

|                              |                    |                                                                         |     |                                                                                                                                                                                    |                                                                                                                                                                                                                                                                                           |                                                                                                                                                                                                |                                                                                                                                                                                                                                                                                                                                                                                                                                                                                               |                                                                                                                                                                                                                  |
|------------------------------|--------------------|-------------------------------------------------------------------------|-----|------------------------------------------------------------------------------------------------------------------------------------------------------------------------------------|-------------------------------------------------------------------------------------------------------------------------------------------------------------------------------------------------------------------------------------------------------------------------------------------|------------------------------------------------------------------------------------------------------------------------------------------------------------------------------------------------|-----------------------------------------------------------------------------------------------------------------------------------------------------------------------------------------------------------------------------------------------------------------------------------------------------------------------------------------------------------------------------------------------------------------------------------------------------------------------------------------------|------------------------------------------------------------------------------------------------------------------------------------------------------------------------------------------------------------------|
|                              |                    |                                                                         |     |                                                                                                                                                                                    |                                                                                                                                                                                                                                                                                           |                                                                                                                                                                                                | membranes,<br>gestational diabetes,<br>mode of delivery -<br>caesarean section and<br>vaginal                                                                                                                                                                                                                                                                                                                                                                                                 |                                                                                                                                                                                                                  |
| Garcia-Flores V, 2021<br>USA | Prospective cohort | 15 women<br><br>7 mothers<br>with<br>confirmed<br>COVID-<br>19          |     | It is unclear how testing was<br>carried out.<br><br>2 groups:<br>1) Pregnant women positive<br>for COVID-19<br>2) Healthy gestational age-<br>matched controls                    | Mothers were<br>diagnosed by<br>nasopharyngeal<br>swabs                                                                                                                                                                                                                                   | Maternal COVID<br>infection                                                                                                                                                                    | Pregnancy-related:<br>preterm delivery,<br>mode of delivery -<br>caesarean section and<br>vaginal, pregnancy<br>induced hypertension                                                                                                                                                                                                                                                                                                                                                          |                                                                                                                                                                                                                  |
| Haye MT, 2021<br>Chile       | Prospective cohort | 458<br>women<br><br>458<br>mothers<br>with<br>confirmed<br>COVID-<br>19 | 222 | All pregnant and puerperal<br>women with confirmed<br>COVID-19 who presented to<br>the triage area of the San<br>Jose hospital<br><br>It is unclear how testing was<br>carried out | Mothers were<br>diagnosed by<br>nasopharyngeal<br>swabs<br><br>Newborns were<br>diagnosed by<br>nasopharyngeal<br>swabs within 12<br>hours of delivery,<br>except in cases<br>where the<br>contagion was<br>more than 21<br>days before<br>childbirth.<br>Positive tests<br>were repeated | Age, gestational<br>age, parity,<br>multiple<br>pregnancies, any<br>co-morbidities,<br>chronic<br>hypertension,<br>diabetes, asthma,<br>obesity,<br>gestational<br>diabetes, pre-<br>eclampsia | COVID-related: all-<br>cause mortality,<br>respiratory failure,<br>invasive ventilation,<br>oxygenation,<br>coagulopathy,<br>admission to ICU,<br>admission to<br>hospital, acute<br>cardiac/ renal/<br>hepatic injury,<br>septicaemia<br><br>Pregnancy-related:<br>miscarriage<br>(spontaneous),<br>preterm delivery,<br>preterm-premature<br>rupture of<br>membranes,<br>gestational diabetes,<br>mode of delivery -<br>caesarean section and<br>vaginal, pregnancy<br>induced hypertension | Stillbirth,<br>neonatal death,<br>admission to<br>neonatal unit,<br>congenital<br>malformation,<br>disseminated<br>intravascular<br>coagulation,<br>Apgar score at 5<br>minutes, small<br>for gestational<br>age |

|                           |                      |                                                                  |      |                                                                                                                                                                                                                                                         |                                                                                                                                                                               |                                                                                                                                               |                                                                                                                                                                                                          |                                                          |
|---------------------------|----------------------|------------------------------------------------------------------|------|---------------------------------------------------------------------------------------------------------------------------------------------------------------------------------------------------------------------------------------------------------|-------------------------------------------------------------------------------------------------------------------------------------------------------------------------------|-----------------------------------------------------------------------------------------------------------------------------------------------|----------------------------------------------------------------------------------------------------------------------------------------------------------------------------------------------------------|----------------------------------------------------------|
| Kiappe OP, 2021<br>Brazil | Prospective cohort   | 165 women<br><br>165 mothers with confirmed COVID-19             | 165  | All pregnant women admitted to 3 maternal hospitals in São Paulo who delivered<br><br>It is unclear how testing was carried out<br><br>Newborns were excluded if there was evidence of congenital malformation                                          | Mothers and newborns were diagnosed by nasopharyngeal swabs. Positive IgM serology was also considered as diagnostic for mothers.                                             |                                                                                                                                               | Pregnancy-related: preterm delivery                                                                                                                                                                      | Congenital malformation, Apgar scores at 1 and 5 minutes |
| Knight M (2), 2021<br>UK  | Retrospective cohort | 1134 women<br><br>1134 mothers with suspected/confirmed COVID-19 |      | All pregnant women admitted with confirmed COVID-19, or respiratory compromise in the presence of characteristic radiographic changes, or both<br><br>It is unclear how testing was carried out                                                         | Mothers were diagnosed by RT-PCR tests of blood or nasopharyngeal swabs, or presence of characteristic radiographic changes                                                   |                                                                                                                                               |                                                                                                                                                                                                          |                                                          |
| Knight M (2), 2021<br>UK  | Retrospective cohort | 5479 women<br><br>5479 mothers with suspected/confirmed COVID-19 | 4529 | All pregnant women admitted with confirmed COVID-19, or respiratory compromise in the presence of characteristic radiographic changes<br><br>Universal screening was carried out                                                                        | Mothers were diagnosed by RT-PCR tests of blood or nasopharyngeal swabs, or presence of characteristic radiographic changes<br><br>Method of diagnosis of newborns is unclear | Age, ethnicity, obesity, parity, multiple pregnancy, asthma, chronic hypertension, diabetes, gestational diabetes, pre-eclampsia, any symptom | COVID-related: all-cause mortality, pneumonia, invasive ventilation, admission to ICU<br><br>Pregnancy-related: preterm delivery, gestational diabetes, mode of delivery - caesarean section and vaginal | Stillbirth, neonatal death, admission to neonatal unit   |
| Krogstad P, 2021<br>USA   | Retrospective cohort | 66 women<br><br>66 mothers with confirmed COVID-19               | 64   | All postnatal women participating in the Mommy's Milk Human Milk Biorepository at the University of California. Women were symptomatic, exposed to an infected person or had confirmed COVID-19 result<br><br>It is unclear how testing was carried out | Mothers were diagnosed by RT-PCRs                                                                                                                                             |                                                                                                                                               | COVID-related: oxygenation, severe pneumonia,                                                                                                                                                            |                                                          |

|                                     |                      |                                                                                                           |      |                                                                                                                                                                                                              |                                                                                                                                                                                                |                                                                                                                                                            |                                                                                                                                                                                                                                                                                                                                                                   |                                                                                                                                                  |
|-------------------------------------|----------------------|-----------------------------------------------------------------------------------------------------------|------|--------------------------------------------------------------------------------------------------------------------------------------------------------------------------------------------------------------|------------------------------------------------------------------------------------------------------------------------------------------------------------------------------------------------|------------------------------------------------------------------------------------------------------------------------------------------------------------|-------------------------------------------------------------------------------------------------------------------------------------------------------------------------------------------------------------------------------------------------------------------------------------------------------------------------------------------------------------------|--------------------------------------------------------------------------------------------------------------------------------------------------|
| Liu Y (1), 2021<br>China            | Retrospective cohort | 13 women<br><br>13 mothers with confirmed COVID-19                                                        | 9    | All laboratory confirmed pregnant women admitted to hospitals outside of Wuhan<br><br>It is unclear how testing was carried out                                                                              | Method of diagnosis is unclear                                                                                                                                                                 |                                                                                                                                                            | COVID-related:<br>severe pneumonia<br><br>Pregnancy-related:<br>preterm delivery                                                                                                                                                                                                                                                                                  |                                                                                                                                                  |
| Martinez-Perez O (2), 2021<br>Spain | Prospective cohort   | 12153 women<br><br>246 mothers with confirmed COVID-19                                                    | 1009 | All women admitted to the delivery ward<br><br>Universal screening was carried out<br><br>2 groups:<br>1) Infected group of women with a positive PCR test<br>2) Non-infected women with a negative PCR test | Mothers were diagnosed by positive double-sampling PCR from nasopharyngeal swabs<br><br>Newborns diagnosed by PCR testing within 48 hours of delivery                                          | Age, ethnicity, parity, smoking, obesity, chronic hypertension, asthma, diabetes, multiple pregnancy, pregnancy induced hypertension, gestational diabetes | COVID-related: all-cause mortality, COVID-specific mortality, pneumonia, invasive ventilation, admission to ICU, severe pneumonia, septicemia<br><br>Pregnancy-related: preterm delivery, spontaneous preterm of delivery, preterm-premature rupture of membranes, gestational diabetes, mode of delivery - caesarean section and vaginal, postpartum haemorrhage | Stillbirth, neonatal death, foetal growth restriction, admission to the neonatal unit, length of stay in neonatal unit, Apgar score at 5 minutes |
| Nambiar SS (3), 2020<br>India       | Retrospective cohort | 350 women<br><br>350 mothers with suspected/confirmed COVID-19<br><br>261 mothers with confirmed COVID-19 | 253  | All women admitted to the tertiary referral centre<br><br>Universal screening was carried out                                                                                                                | Mothers were diagnosed with routine testing done for all pregnant women according to state protocol, and RT-PCR tests<br><br>Newborns were diagnosed with RT-PCR tests after 24 hours of birth |                                                                                                                                                            | Pregnancy related:<br>mode of delivery - caesarean section and vaginal                                                                                                                                                                                                                                                                                            |                                                                                                                                                  |

|                           |                      |                                                      |    |                                                                                                                                                                                                                                                                                     |                                                                                                                                        |                                                                                                                                                        |                                                                                                                                                                                                                   |
|---------------------------|----------------------|------------------------------------------------------|----|-------------------------------------------------------------------------------------------------------------------------------------------------------------------------------------------------------------------------------------------------------------------------------------|----------------------------------------------------------------------------------------------------------------------------------------|--------------------------------------------------------------------------------------------------------------------------------------------------------|-------------------------------------------------------------------------------------------------------------------------------------------------------------------------------------------------------------------|
| Poon L, 2021<br>China     | Prospective cohort   | 20 women<br><br>20 mothers with confirmed COVID-19   |    | All pregnant women with laboratory confirmed COVID-19<br><br>It is unclear how testing was carried out                                                                                                                                                                              | Mothers were diagnosed by deep throat saliva or nasopharyngeal swabs                                                                   |                                                                                                                                                        | Pregnancy-related: miscarriage (spontaneous), induced abortion                                                                                                                                                    |
| Rahmani M, 2021<br>Iran   | Retrospective cohort | 40 women<br><br>25 mothers with confirmed COVID-19   | 14 | All women referred to three hospitals with positive COVID-19 results<br><br>It is unclear how testing was carried out<br><br>2 groups:<br>1) Pregnant women with COVID-19<br>2) Non-pregnant women with COVID-19                                                                    | Mothers were diagnosed by RT-PCRs                                                                                                      | Pregnant status                                                                                                                                        | COVID-related: all-cause mortality, admission to ICU, hospital admission                                                                                                                                          |
| Samadi P, 2021<br>Iran    | Prospective cohort   | 258 women<br><br>258 mothers with confirmed COVID-19 |    | All women at 5-42 weeks pregnancy admitted to the tertiary referral hospital with confirmed COVID-19<br><br>It is unclear how testing was carried out                                                                                                                               | Mothers were diagnosed by RT-PCRs or presence of marked changes in computer tomography (CT) scans                                      | Obesity, parity, multiple pregnancy, asthma, chronic hypertension, gestational diabetes, diabetes, lymphopenia, abnormal LFT, raised CRP, ground glass | COVID-related: all-cause mortality, admission to ICU, severe pneumonia<br><br>Pregnancy-related: induced abortion, gestational diabetes, mode of delivery - caesarean section and vaginal, postpartum haemorrhage |
| Santana LB, 2021<br>Spain | Retrospective cohort | 87 women<br><br>29 mothers with confirmed COVID-19   | 32 | All pregnant women in the third trimester of gestation with a COVID-19 diagnosis, who gave birth in the centre and had a placenta available for pathological examination<br><br>Universal screening was carried out<br><br>2 groups:<br>1) Pregnant women with a COVID-19 diagnosis | Mothers were diagnosed by nasopharyngeal swabs<br><br>Newborns were diagnosed by nasopharyngeal swabs at birth and at 48 hours of life |                                                                                                                                                        |                                                                                                                                                                                                                   |

|                               |                      |                                                      |     |                                                                                                                                                                                                                                                                       |                                                                                                                                           |                                                                                                                               |                                                                                                                                                                                                     |                                                                                                    |
|-------------------------------|----------------------|------------------------------------------------------|-----|-----------------------------------------------------------------------------------------------------------------------------------------------------------------------------------------------------------------------------------------------------------------------|-------------------------------------------------------------------------------------------------------------------------------------------|-------------------------------------------------------------------------------------------------------------------------------|-----------------------------------------------------------------------------------------------------------------------------------------------------------------------------------------------------|----------------------------------------------------------------------------------------------------|
|                               |                      |                                                      |     | 2) Control group of pregnant women with controlled, uneventful pregnancies                                                                                                                                                                                            |                                                                                                                                           |                                                                                                                               |                                                                                                                                                                                                     |                                                                                                    |
| Sehra R, 2021<br>India        | Retrospective cohort | 120 women<br><br>120 mothers with confirmed COVID-19 | 120 | All neonates delivered by COVID-19 positive pregnant women and admitted to the neonatal unit<br><br>It is unclear how testing was carried out<br><br>Neonates delivered by COVID-19 negative mothers and whose parents refused to give informed consent were excluded | Method of diagnosis of mothers is unclear<br><br>Newborns were diagnosed by throat swabs within 24 hours and at 72 hours of postnatal age |                                                                                                                               | Pregnancy-related: preterm delivery, mode of delivery - caesarean section and vaginal                                                                                                               | Neonatal death, neonatal sepsis                                                                    |
| Soto-Torres E, 2021<br>USA    | Retrospective cohort | 209 women<br><br>106 mothers with confirmed COVID-19 | 209 | All women admitted for delivery and tested positive for COVID-19<br><br>Universal screening was carried out<br><br>2 groups:<br>1) Pregnant women positive for COVID-19<br>2) Matched control group of pregnant women with a negative COVID-19 result                 | Mothers were diagnosed by viral RNA PCR or nasopharyngeal swabs                                                                           | Obesity, parity, multiple pregnancy, any comorbidities, pre-eclampsia, diabetes, asthma                                       | COVID-related: pneumonia, invasive or non-invasive ventilation, severe pneumonia<br><br>Pregnancy-related: preterm delivery, gestational diabetes, mode of delivery - caesarean section and vaginal | Stillbirth, foetal growth restriction, admission to neonatal unit, Apgar scores at 1 and 5 minutes |
| Trahan MJ (3), 2021<br>Canada | Retrospective cohort | 2253 women<br><br>45 mothers with confirmed COVID-19 | 274 | All pregnant women who delivered at the two study sites<br><br>Testing was initially for at-risk patients. Universal screening was implemented from May 2020.<br><br>2 groups:                                                                                        | Mothers were diagnosed by nasopharyngeal swabs                                                                                            | Age, ethnicity, parity, asthma, diabetes, chronic hypertension, obesity, gestational diabetes, pregnancy induced hypertension | COVID-related: all-cause mortality, COVID-related mortality, invasive ventilation, oxygenation, admission to hospital, severe pneumonia<br><br>Pregnancy-related: preterm delivery,                 | Foetal growth restriction, gestational age, admission to neonatal unit, foetal distress            |

|                        |                      |                                                      |    |                                                                                                                                                                                                                                                                                                                                           |                                                                                                                                                                  |                                                                                                                           |                                                                                                                                                                                                                                                                                                 |                                                                                        |
|------------------------|----------------------|------------------------------------------------------|----|-------------------------------------------------------------------------------------------------------------------------------------------------------------------------------------------------------------------------------------------------------------------------------------------------------------------------------------------|------------------------------------------------------------------------------------------------------------------------------------------------------------------|---------------------------------------------------------------------------------------------------------------------------|-------------------------------------------------------------------------------------------------------------------------------------------------------------------------------------------------------------------------------------------------------------------------------------------------|----------------------------------------------------------------------------------------|
|                        |                      |                                                      |    | 1) Pregnant women who tested positive for COVID-19<br>2) Pregnant women who tested negative for COVID-19 and delivered within one day at the same centre , at a ratio of 1:5                                                                                                                                                              |                                                                                                                                                                  |                                                                                                                           | spontaneous preterm delivery, preterm-premature rupture of membranes, gestational diabetes, mode of delivery - caesarean section and vaginal, pregnancy induced hypertension                                                                                                                    |                                                                                        |
| Vizheh M, 2021<br>Iran | Retrospective cohort | 344 women<br><br>110 mothers with confirmed COVID-19 | 51 | All hospitalised women of reproductive age who tested positive for COVID-19 across three hospitals in Tehran<br><br>It is unclear how testing was carried out<br><br>Women older than 45 years old and younger than 15 years old were excluded<br><br>2 groups:<br>1) Pregnant women with COVID-19<br>2) Non-pregnant women with COVID-19 | Mothers were diagnosed by RT-PCRs                                                                                                                                | Age, pregnancy status, any co-morbidity, chronic hypertension, diabetes, fever, cough, myalgia, breathlessness, diarrhoea | COVID-related: all-cause mortality, acute respiratory distress syndrome, admission to ICU, severe pneumonia, acute cardiac/ renal/ hepatic injury<br><br>Pregnancy-related: miscarriage (spontaneous), preterm delivery, gestational diabetes, mode of delivery - caesarean section and vaginal | Neonatal death, foetal growth restriction, admission to neonatal unit, foetal distress |
| Wang X, 2021<br>China  | Retrospective cohort | 26 women<br><br>26 mothers with confirmed COVID-19   | 27 | All pregnant women diagnosed with COVID-19 and their newborns who were admitted to the neonatal unit<br><br>It is unclear how testing was carried out                                                                                                                                                                                     | Mothers were diagnosed by pharyngeal swabs and serology IgM/IgG testing for SARS-CoV-2<br><br>Newborns were diagnosed by serology IgM/IgG testing for SARS-CoV-2 |                                                                                                                           |                                                                                                                                                                                                                                                                                                 | Gestational age                                                                        |



|                                   |                      |                                                      |     |                                                                                                                                                                                                                                                                                                                    |                                                                                                                                                                                       |                                                                                                                                                                   |                                                                                                                                                                                                                                                           |                                                                                                                                                               |
|-----------------------------------|----------------------|------------------------------------------------------|-----|--------------------------------------------------------------------------------------------------------------------------------------------------------------------------------------------------------------------------------------------------------------------------------------------------------------------|---------------------------------------------------------------------------------------------------------------------------------------------------------------------------------------|-------------------------------------------------------------------------------------------------------------------------------------------------------------------|-----------------------------------------------------------------------------------------------------------------------------------------------------------------------------------------------------------------------------------------------------------|---------------------------------------------------------------------------------------------------------------------------------------------------------------|
| Yao R, 2021<br>USA                | Retrospective cohort | 51 women<br><br>51 mothers with confirmed COVID-19   |     | All pregnant women with laboratory confirmed COVID-19 admitted to the labour and delivery unit<br><br>Universal screening was carried out<br><br>Patients who were transferred from another facility after intubation and more than 24 hours from initial confirmatory test were excluded                          | Mothers were diagnosed by nasopharyngeal swabs<br><br>Newborns were diagnosed by PCR, and either tested after 12 and 36 hours after delivery, or after 24 and 48 hours after delivery | Age, BMI, gestational age, chronic hypertension, pregnancy induced hypertension, diabetes, asthma, any symptom, breathlessness, cough, fever, myalgia, raised CRP | COVID-related: invasive or non-invasive ventilation                                                                                                                                                                                                       |                                                                                                                                                               |
| ROUND 27                          |                      |                                                      |     |                                                                                                                                                                                                                                                                                                                    |                                                                                                                                                                                       |                                                                                                                                                                   |                                                                                                                                                                                                                                                           |                                                                                                                                                               |
| Al-Matary A, 2021<br>Saudi Arabia | Retrospective cohort | 288 women<br><br>288 mothers with confirmed COVID-19 | 208 | All pregnant women with confirmed COVID-19 at three hospitals in Riyadh and their neonates<br><br>It is unclear how testing was carried out                                                                                                                                                                        | Mothers were diagnosed by PCR<br><br>Newborns were diagnosed by PCR, and either tested after 12 and 36 hours after delivery, or after 24 and 48 hours after delivery                  |                                                                                                                                                                   | COVID-related: all-cause mortality, pneumonia, invasive ventilation, oxygenation, non-invasive ventilation, admission to ICU<br><br>Pregnancy-related: preterm delivery, mode of delivery - caesarean section and vaginal, pregnancy induced hypertension | Stillbirth, neonatal death, foetal growth restriction, admission to neonatal unit, length of stay in neonatal unit, Apgar score at 5 minutes, foetal distress |
| Alaya F, 2021<br>Ireland          | Prospective cohort   | 38 women<br><br>18 mothers with confirmed COVID-19   |     | All pregnant and postnatal women attending an Irish tertiary maternity hospital.<br><br>Women were eligible to participate if they attended the maternity unit during the COVID-19 pandemic, if they had capacity, spoke English, and were at least 18 years old.<br><br>It is unclear how testing was carried out | Method of diagnosis is unclear                                                                                                                                                        | Age, ethnicity, parity                                                                                                                                            |                                                                                                                                                                                                                                                           |                                                                                                                                                               |

|                                  |                      |                                                        |      |                                                                                                                                                                                                                                                                                                                                                    |                                                                                                 |                            |                                                                                                                                                                                                                                                                                                                                        |                                                                                                                                                         |
|----------------------------------|----------------------|--------------------------------------------------------|------|----------------------------------------------------------------------------------------------------------------------------------------------------------------------------------------------------------------------------------------------------------------------------------------------------------------------------------------------------|-------------------------------------------------------------------------------------------------|----------------------------|----------------------------------------------------------------------------------------------------------------------------------------------------------------------------------------------------------------------------------------------------------------------------------------------------------------------------------------|---------------------------------------------------------------------------------------------------------------------------------------------------------|
|                                  |                      |                                                        |      | 2 groups:<br>1) Pregnant women who tested positive for COVID-19<br>2) Perinatal women with no signs, symptoms or positive COVID-19 results from the postnatal wards                                                                                                                                                                                |                                                                                                 |                            |                                                                                                                                                                                                                                                                                                                                        |                                                                                                                                                         |
| Angelidou A, 2021<br>USA         | Retrospective cohort | 250 women<br><br>250 mothers with confirmed COVID-19   | 255  | All neonates born to mothers with positive COVID-19 result 14 days before to 72 hours after delivery<br><br>Universal screening was carried out                                                                                                                                                                                                    | Mothers and newborns diagnosed by nasopharyngeal swabs                                          |                            | COVID-related: admission to hospital<br><br>Pregnancy-related: preterm delivery, mode of delivery - caesarean section and vaginal                                                                                                                                                                                                      | Gestational age, admission to neonatal unit, congenital malformation                                                                                    |
| Calvo VE, 2021<br>Spain          | Prospective cohort   | 1347 women<br><br>1347 mothers with confirmed COVID-19 | 1347 | All pregnant women with a positive COVID-19 diagnosis registered by the Spanish Obstetric emergency group<br><br>Symptomatic testing was initially carried out. Universal screening was implemented from 1 <sup>st</sup> April<br><br>4 groups:<br>1) Asymptomatic<br>2) Mild-moderate symptoms<br>3) Severe pneumonia<br>4) Complicated pneumonia | Mothers were diagnosed by positive double sampling using nasopharyngeal swabs                   |                            | COVID-related: all-cause mortality, pneumonia, invasive ventilation, coagulopathy, admission to ICU, severe pneumonia<br><br>Pregnancy-related: preterm delivery, spontaneous preterm delivery, preterm-premature rupture of membranes, gestational diabetes, mode of delivery - caesarean section and vaginal, postpartum haemorrhage | Stillbirth, neonatal death, foetal growth restriction, admission to the neonatal unit, disseminated intravascular coagulation, Apgar score at 5 minutes |
| Cardona-Pérez JA, 2021<br>Mexico | Retrospective cohort | 240 women<br><br>240 mothers with confirmed COVID-19   | 229  | All pregnant women admitted for delivery with a positive COVID-19 result. Two groups of women were admitted for delivery: scheduled C-section or obstetric emergency during labour                                                                                                                                                                 | Mothers were diagnosed by nasopharyngeal swabs<br><br>Newborns were diagnosed by nasopharyngeal | Multiple pregnancy, parity | COVID-related: all-cause mortality, pneumonia, admission to ICU<br><br>Pregnancy-related: miscarriage (spontaneous), preterm delivery,                                                                                                                                                                                                 | Stillbirth, neonatal death, admission to the neonatal unit, congenital malformation, Apgar score at 5 minutes                                           |

|                           |                    |                                                      |     |                                                                                                                                                                                                                                                                                                                                                |                                                                                                                                                                                                                                                                                   |                                                                    |                                                                                                                                        |                                                    |
|---------------------------|--------------------|------------------------------------------------------|-----|------------------------------------------------------------------------------------------------------------------------------------------------------------------------------------------------------------------------------------------------------------------------------------------------------------------------------------------------|-----------------------------------------------------------------------------------------------------------------------------------------------------------------------------------------------------------------------------------------------------------------------------------|--------------------------------------------------------------------|----------------------------------------------------------------------------------------------------------------------------------------|----------------------------------------------------|
|                           |                    |                                                      |     | <p>Universal screening was carried out</p> <p>2 groups for mothers:<br/>1) Pregnant women with positive RT-qPCR results<br/>2) Pregnant women with negative RT-qPCR results</p> <p>3 groups for newborns:<br/>1) Positive neonate of positive mother<br/>2) Negative neonate of positive mother<br/>3) Negative neonate of negative mother</p> | swabs within 24 hours of birth                                                                                                                                                                                                                                                    |                                                                    | gestational diabetes, mode of delivery - caesarean section and vaginal, postpartum haemorrhage                                         |                                                    |
| Carrasco I, 2021<br>Spain | Prospective cohort | 105 women<br><br>105 mothers with confirmed COVID-19 | 107 | <p>All pregnant women with confirmed COVID-19 that delivered, and their newborns</p> <p>Universal screening was carried out</p> <p>Women with miscarriage, foetal death and dead newborns were excluded</p>                                                                                                                                    | <p>Mothers were diagnosed by nasopharyngeal swabs or serology IgM/IgG or high clinical suspicion</p> <p>Newborns were diagnosed by nasopharyngeal swabs taken at 24 hours and 15 days of life. Chest x-ray was performed when indicated clinically and with informed consent.</p> | Ethnicity, 3 <sup>rd</sup> trimester, any comorbidity, any symptom | <p>COVID-related: admission to ICU</p> <p>Pregnancy-related: preterm delivery</p>                                                      | Gestational age                                    |
| Charki S, 2021<br>India   | Prospective cohort | 720 women<br><br>26 mothers with confirmed COVID-19  | 28  | <p>All neonates born to mothers who tested positive for COVID-19 at the time of delivery</p> <p>Universal screening was carried out</p>                                                                                                                                                                                                        | <p>Mothers were diagnosed by nasopharyngeal swabs</p> <p>Newborns were diagnosed by nasopharyngeal swabs at 12-72 hours of life</p>                                                                                                                                               |                                                                    | <p>COVID-related: all-cause mortality</p> <p>Pregnancy-related: preterm delivery, mode of delivery - caesarean section and vaginal</p> | Neonatal pneumonia, admission to the neonatal unit |

|                                 |                      |                                                     |     |                                                                                                                                                                                                                            |                                                                                  |                                                                                                                                                                           |                                                                                                                                                                                                                                                                                                                 |                                                                                                         |
|---------------------------------|----------------------|-----------------------------------------------------|-----|----------------------------------------------------------------------------------------------------------------------------------------------------------------------------------------------------------------------------|----------------------------------------------------------------------------------|---------------------------------------------------------------------------------------------------------------------------------------------------------------------------|-----------------------------------------------------------------------------------------------------------------------------------------------------------------------------------------------------------------------------------------------------------------------------------------------------------------|---------------------------------------------------------------------------------------------------------|
| Chowdhury L, 2021<br>Bangladesh | Retrospective cohort | 81 women<br><br>81 mothers with confirmed COVID-19  | 81  | All pregnant women admitted to the tertiary care hospital positive for RNA of SARS-CoV-2, and their neonates<br><br>It is unclear how testing was carried out<br><br>Patients treated on an outpatient basis were excluded | Mothers were diagnosed by RT-PCRs<br><br>Newborns were diagnosed by throat swabs |                                                                                                                                                                           | COVID-related: all-cause mortality, invasive ventilation, coagulopathy, admission to ICU, admission to hospital, severe pneumonia<br><br>Pregnancy-related: miscarriage (spontaneous), preterm delivery, gestational diabetes, mode of delivery - caesarean section and vaginal, pregnancy induced hypertension | Stillbirth, neonatal death, neonatal pneumonia, disseminated intravascular coagulation, foetal distress |
| Liu C, 2021<br>USA              | Retrospective cohort | 335 women<br><br>56 mothers with confirmed COVID-19 | 326 | All pregnant women admitted for labour<br><br>Universal screening was carried out                                                                                                                                          | Mothers were diagnosed by nasopharyngeal swabs                                   | Age, ethnicity, cough, fever, any symptom, breathlessness, chronic hypertension, pregnancy induced hypertension, diabetes, gestational diabetes, asthma, obesity, smoking | COVID-related: pneumonia, invasive ventilation, non-invasive ventilation, severe pneumonia<br><br>Pregnancy-related: preterm delivery, gestational diabetes, mode of delivery - caesarean section and vaginal, postpartum haemorrhage                                                                           | Stillbirth, Apgar scores at 1 and 5 minutes                                                             |
| Mohammed A, 2021<br>Iraq        | Retrospective cohort | 100 women<br><br>29 mothers with confirmed COVID-19 | 0   | All aborted women who attended Imam Ali Hospital<br><br>It is unclear how testing was carried out                                                                                                                          | Mothers were diagnosed by serology IgM antibodies using the ELISA technique      |                                                                                                                                                                           |                                                                                                                                                                                                                                                                                                                 |                                                                                                         |

|                             |                      |                                                          |      |                                                                                                                                                                                                                                                                                                                                                                                           |                                                                                                                                  |                                                                                                                                                                                                              |                                                                                                                                                            |
|-----------------------------|----------------------|----------------------------------------------------------|------|-------------------------------------------------------------------------------------------------------------------------------------------------------------------------------------------------------------------------------------------------------------------------------------------------------------------------------------------------------------------------------------------|----------------------------------------------------------------------------------------------------------------------------------|--------------------------------------------------------------------------------------------------------------------------------------------------------------------------------------------------------------|------------------------------------------------------------------------------------------------------------------------------------------------------------|
| Ozer KB (1), 2021<br>Turkey | Retrospective cohort | 34 women<br><br>15 mothers with confirmed COVID-19       |      | All women of reproductive age with positive COVID-19 results admitted to the pandemic ward of the tertiary healthcare centre<br><br>It is unclear how testing was carried out<br><br>Female patients under 18 years old, those not of childbearing age, all male patients, and patients without CT findings specific to COVID-19 or who were not positive after a PCR test were excluded. | Method of diagnosis is unclear                                                                                                   | Asthma, chronic hypertension, diabetes                                                                                                                                                                       | COVID-related: invasive ventilation, severe pneumonia                                                                                                      |
| Rozo N, 2021<br>Colombia    | Prospective cohort   | 371363 women<br><br>5614 mothers with confirmed COVID-19 | 2294 | All women aged 15-44 years old with laboratory confirmed COVID-19 by molecular or antigen testing<br><br>It is unclear how testing was carried out<br><br>2 groups:<br>1) Pregnant women with COVID-19<br>2) Non-pregnant women with COVID-19                                                                                                                                             | Mothers are diagnosed by RT-PCR or a positive antigen test                                                                       | Age, asthma, obesity, any co-morbidity, COPD, chronic hypertension, diabetes, any symptom, fever, cough, breathlessness, diarrhoea, smoking, pregnancy status, 3 <sup>rd</sup> trimester, multiple pregnancy | COVID-related: all-cause mortality, admission to hospital<br><br>Pregnancy-related: preterm delivery, mode of delivery - caesarean section and vaginal     |
| Shlomain NO, 2021<br>Israel | Retrospective cohort | 53 women<br><br>53 mothers with confirmed COVID-19       | 55   | All COVID-19 positive women who delivered at 11 Israeli birth centres<br><br>Universal screening was carried out at 2 centres. Symptomatic testing based on clinical suspicion or high risk was carried out at the other centres                                                                                                                                                          | Method of diagnosis of mothers is unclear<br><br>Newborns were diagnosed by nasopharyngeal swabs at 24 and 48 hours postdelivery |                                                                                                                                                                                                              | Pregnancy-related: mode of delivery – vaginal<br><br>Gestational age, large for gestational age, small for gestational age, admission to the neonatal unit |

|                                |                    |                                                                                                               |  |                                                                                                                                                                                                                                                                                                                                                                                                                                                                                                                                    |                                                                                                            |                                               |                                                                                                                                                                                 |                                            |
|--------------------------------|--------------------|---------------------------------------------------------------------------------------------------------------|--|------------------------------------------------------------------------------------------------------------------------------------------------------------------------------------------------------------------------------------------------------------------------------------------------------------------------------------------------------------------------------------------------------------------------------------------------------------------------------------------------------------------------------------|------------------------------------------------------------------------------------------------------------|-----------------------------------------------|---------------------------------------------------------------------------------------------------------------------------------------------------------------------------------|--------------------------------------------|
| Villar J, 2021<br>18 countries | Prospective cohort | 2130 women<br><br>706 mothers with suspected or confirmed COVID-19<br><br>652 mothers with confirmed COVID-19 |  | All women 18 years or older at any stage of pregnancy or delivery with a COVID-19 diagnosis based on laboratory confirmation or radiologic pulmonary findings<br><br>It is unclear how testing was carried out<br><br>2 groups:<br>1) Women with a COVID-19 diagnosis<br>2) Women without a COVID-19 diagnosis of a similar gestational age ( $\pm$ 2 weeks) receiving standard antenatal care<br><br>Women/neonates whose data was already published in any comparative study with women without COVID-19 diagnosis were excluded | Method of diagnosis is unclear<br><br>Some newborns (416) were tested in the first 24 or 48 hours of birth | Pregnancy induced hypertension, pre-eclampsia | COVID-related: all-cause mortality, admission to ICU<br><br>Pregnancy-related: preterm delivery, spontaneous preterm delivery, mode of delivery - caesarean section and vaginal | Gestational age, foetal distress           |
| Zeng LK, 2021<br>China         | Prospective cohort | 72 women 72<br><br>72 mothers with suspected or confirmed COVID-19<br><br>52 mothers with confirmed COVID-19  |  | All neonates born to mothers with COVID-19 admitted to the two children's hospitals in Hubei Province<br><br>2 groups:<br>1) Neonates with COVID-19<br>2) Neonates without COVID-19<br><br>Neonates with major anomalies defined according to the US Centers for Disease Control and Prevention guidelines were excluded                                                                                                                                                                                                           | Followed diagnostic criteria according to National Health Commission of China.                             | 3 <sup>rd</sup> trimester                     | Pregnancy-related: mode of delivery – caesarean section                                                                                                                         | Gestational age, small for gestational age |

\* Selected risk factors excluded from analysis on suspicion of duplication

# Only contributed to comparative cohort analysis

§ UKOSS pre-print and Knight M. et al treated as different publications for some analysis

Cohen J 2020 and Ellington S 2020 excluded due to overlap in reported cohort

**Appendix 4a: Quality assessment using the Newcastle-Ottawa Scale for risk of bias of studies included in the living systematic review on COVID-19 and pregnancy**

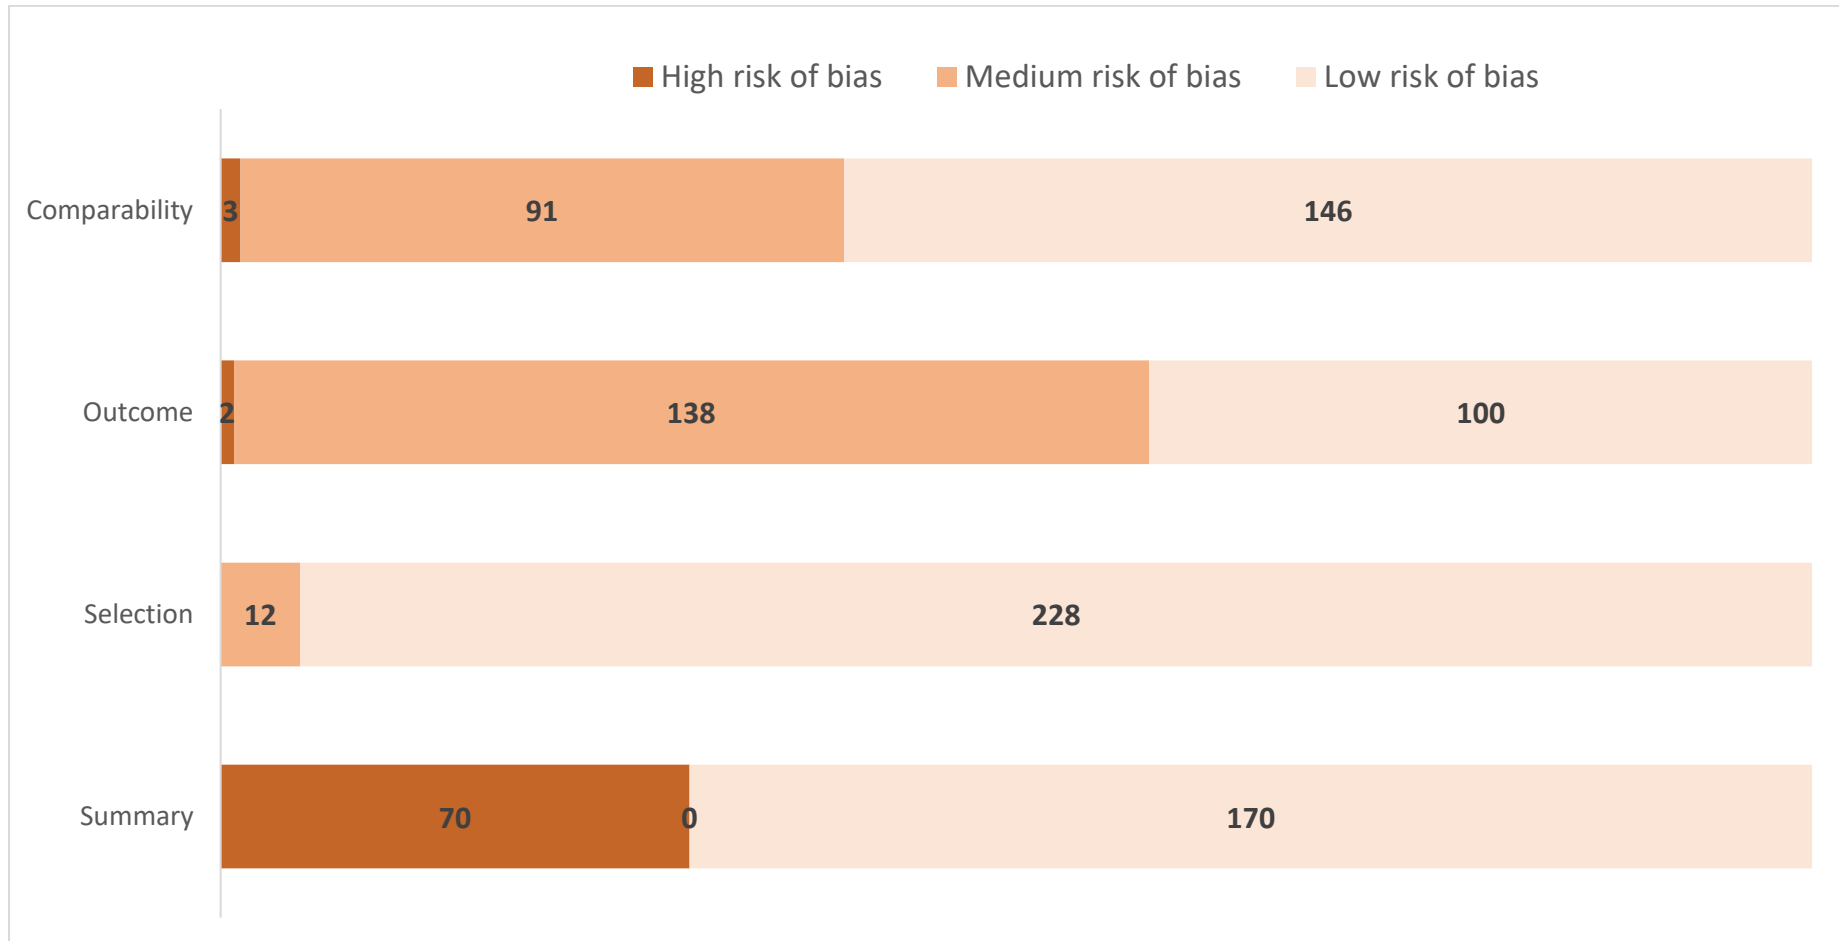

**Appendix 4b: Quality assessment of prevalence studies included in the living systematic review on COVID-19 and pregnancy using the tool by Hoy et al**

| Study                       | External Validity  |                |           |              | Internal validity |                 |             |                           |                    |                                       | Summary  |
|-----------------------------|--------------------|----------------|-----------|--------------|-------------------|-----------------|-------------|---------------------------|--------------------|---------------------------------------|----------|
|                             | Representativeness | Sampling frame | Selection | Non-response | Data collection   | Case definition | Measurement | Differential verification | Adequate follow up | Appropriate numerator and denominator | Summary  |
| Abdulghani SH 2021          | HIGH               | HIGH           | LOW       | LOW          | LOW               | LOW             | LOW         | LOW                       | LOW                | LOW                                   | LOW      |
| Abedzadeh-Kalahroudi M 2021 | HIGH               | HIGH           | LOW       | LOW          | LOW               | LOW             | LOW         | LOW                       | LOW                | LOW                                   | LOW      |
| Abeyasuriya S 2020          | HIGH               | LOW            | LOW       | LOW          | LOW               | LOW             | LOW         | LOW                       | HIGH               | LOW                                   | LOW      |
| Adhikari EH 2020            | HIGH               | HIGH           | LOW       | LOW          | LOW               | LOW             | LOW         | LOW                       | LOW                | LOW                                   | LOW      |
| Afshar Y 2020               | LOW                | HIGH           | LOW       | LOW          | LOW               | LOW             | HIGH        | LOW                       | HIGH               | LOW                                   | LOW      |
| Ahlberg M 2020              | HIGH               | LOW            | LOW       | LOW          | LOW               | HIGH            | LOW         | LOW                       | LOW                | LOW                                   | LOW      |
| Ahmed I (2) 2020            | HIGH               | LOW            | LOW       | LOW          | LOW               | LOW             | LOW         | LOW                       | HIGH               | LOW                                   | LOW      |
| Ajith S 2021                | HIGH               | LOW            | LOW       | LOW          | LOW               | LOW             | LOW         | LOW                       | LOW                | HIGH                                  | LOW      |
| Akbarian-Rad Z 2021         | HIGH               | HIGH           | LOW       | LOW          | LOW               | LOW             | LOW         | LOW                       | LOW                | LOW                                   | LOW      |
| Akram E 2021                | HIGH               | HIGH           | LOW       | LOW          | LOW               | HIGH            | LOW         | LOW                       | HIGH               | HIGH                                  | MODERATE |
| Alay I 2020                 | HIGH               | HIGH           | LOW       | LOW          | LOW               | LOW             | LOW         | LOW                       | HIGH               | LOW                                   | LOW      |
| Alaya F 2021                | HIGH               | HIGH           | LOW       | LOW          | LOW               | LOW             | LOW         | LOW                       | HIGH               | LOW                                   | LOW      |
| Al-Matary A 2021            | HIGH               | HIGH           | LOW       | LOW          | LOW               | LOW             | LOW         | LOW                       | HIGH               | LOW                                   | LOW      |
| Andrikopoulou M (1) 2021    | HIGH               | HIGH           | LOW       | LOW          | LOW               | HIGH            | LOW         | LOW                       | HIGH               | LOW                                   | MODERATE |
| Andrikopoulou M 2020        | HIGH               | HIGH           | LOW       | LOW          | LOW               | LOW             | LOW         | LOW                       | HIGH               | LOW                                   | LOW      |
| Angelidou A 2021            | HIGH               | HIGH           | LOW       | LOW          | LOW               | LOW             | LOW         | LOW                       | LOW                | LOW                                   | LOW      |
| Ansari A (1) 2020           | HIGH               | LOW            | LOW       | LOW          | LOW               | LOW             | LOW         | LOW                       | HIGH               | LOW                                   | LOW      |
| Ansari A 2020               | HIGH               | HIGH           | LOW       | LOW          | LOW               | LOW             | LOW         | LOW                       | LOW                | LOW                                   | LOW      |



|                          |      |      |      |      |     |      |      |     |      |      |          |
|--------------------------|------|------|------|------|-----|------|------|-----|------|------|----------|
| Antoun L 2020            | HIGH | HIGH | LOW  | LOW  | LOW | HIGH | LOW  | LOW | HIGH | LOW  | MODERATE |
| Anuk TA 2021             | HIGH | HIGH | LOW  | LOW  | LOW | LOW  | LOW  | LOW | HIGH | LOW  | LOW      |
| Arakaki T 2021           | LOW  | LOW  | LOW  | HIGH | LOW | LOW  | LOW  | LOW | HIGH | LOW  | LOW      |
| Asem N 2021              | LOW  | HIGH | LOW  | LOW  | LOW | LOW  | LOW  | LOW | HIGH | LOW  | LOW      |
| Askary E 2020            | HIGH | HIGH | LOW  | LOW  | LOW | LOW  | LOW  | LOW | HIGH | LOW  | LOW      |
| Aski SK (1) 2021         | LOW  | HIGH | LOW  | LOW  | LOW | LOW  | LOW  | LOW | HIGH | LOW  | LOW      |
| Aski SK 2020             | HIGH | HIGH | LOW  | LOW  | LOW | LOW  | LOW  | LOW | HIGH | LOW  | LOW      |
| Aslan MM 2020            | HIGH | HIGH | LOW  | LOW  | LOW | LOW  | LOW  | LOW | HIGH | LOW  | LOW      |
| Atyeo C 2021             | HIGH | HIGH | HIGH | LOW  | LOW | HIGH | LOW  | LOW | LOW  | LOW  | MODERATE |
| Ayed A 2020              | HIGH | HIGH | LOW  | LOW  | LOW | LOW  | LOW  | LOW | HIGH | LOW  | LOW      |
| Bachani S 2020           | HIGH | HIGH | LOW  | LOW  | LOW | LOW  | LOW  | LOW | LOW  | LOW  | LOW      |
| Badr DA 2020             | HIGH | HIGH | LOW  | LOW  | LOW | LOW  | LOW  | LOW | HIGH | LOW  | LOW      |
| Bahat PY (1) 2020        | HIGH | HIGH | LOW  | LOW  | LOW | LOW  | LOW  | LOW | HIGH | LOW  | LOW      |
| Baptiste C 2021          | HIGH | LOW  | LOW  | LOW  | LOW | HIGH | LOW  | LOW | HIGH | LOW  | LOW      |
| Barbero P 2020           | HIGH | HIGH | LOW  | LOW  | LOW | LOW  | LOW  | LOW | HIGH | LOW  | LOW      |
| Barbhaiya M 2020         | HIGH | HIGH | LOW  | HIGH | LOW | LOW  | HIGH | LOW | HIGH | HIGH | MODERATE |
| Basu JK 2021             | HIGH | HIGH | LOW  | LOW  | LOW | LOW  | LOW  | LOW | HIGH | LOW  | LOW      |
| Beharier O 2021          | LOW  | HIGH | LOW  | LOW  | LOW | HIGH | LOW  | LOW | LOW  | LOW  | LOW      |
| Behrens E 2020           | HIGH | HIGH | LOW  | LOW  | LOW | HIGH | LOW  | LOW | HIGH | LOW  | MODERATE |
| Belokrinitskaya TE, 2021 | HIGH | HIGH | LOW  | LOW  | LOW | HIGH | LOW  | LOW | HIGH | LOW  | MODERATE |
| Bender WR 2020           | HIGH | LOW  | LOW  | LOW  | LOW | LOW  | LOW  | LOW | HIGH | LOW  | LOW      |
| Berkowitz KM 2020        | HIGH | LOW  | LOW  | LOW  | LOW | LOW  | LOW  | LOW | HIGH | LOW  | LOW      |
| Berry M 2021             | HIGH | LOW  | LOW  | LOW  | LOW | LOW  | LOW  | LOW | HIGH | LOW  | LOW      |
| Bertino E 2020           | HIGH | HIGH | HIGH | LOW  | LOW | LOW  | LOW  | LOW | LOW  | LOW  | LOW      |
| Bianco A 2020            | HIGH | HIGH | LOW  | LOW  | LOW | LOW  | LOW  | LOW | HIGH | LOW  | LOW      |
| Biasucci G 2020          | HIGH | HIGH | LOW  | LOW  | LOW | LOW  | LOW  | LOW | LOW  | LOW  | LOW      |
| Blitz M (1) 2020         | HIGH | HIGH | LOW  | LOW  | LOW | LOW  | LOW  | LOW | HIGH | LOW  | LOW      |
| Blitz M (2) 2020         | HIGH | LOW  | LOW  | LOW  | LOW | LOW  | LOW  | LOW | HIGH | LOW  | LOW      |
| Blitz M 2020             | HIGH | HIGH | LOW  | LOW  | LOW | HIGH | LOW  | LOW | HIGH | LOW  | MODERATE |
| Blitz MJ (3) 2020        | HIGH | LOW  | LOW  | LOW  | LOW | LOW  | LOW  | LOW | HIGH | LOW  | LOW      |

|                         |      |      |      |      |     |      |      |      |      |      |          |
|-------------------------|------|------|------|------|-----|------|------|------|------|------|----------|
| Brandt JS 2020          | HIGH | HIGH | LOW  | LOW  | LOW | LOW  | LOW  | LOW  | HIGH | LOW  | LOW      |
| Breslin N (2) 2020      | HIGH | HIGH | LOW  | LOW  | LOW | HIGH | LOW  | LOW  | HIGH | LOW  | MODERATE |
| Buckley A 2020          | HIGH | HIGH | LOW  | LOW  | LOW | HIGH | LOW  | LOW  | HIGH | LOW  | MODERATE |
| Buckley AB (1) 2021     | HIGH | HIGH | LOW  | HIGH | LOW | HIGH | LOW  | LOW  | LOW  | LOW  | MODERATE |
| Buhimichi CS 2020       | HIGH | HIGH | LOW  | LOW  | LOW | HIGH | LOW  | LOW  | LOW  | LOW  | LOW      |
| Calvo VE 2021           | LOW  | HIGH | LOW  | LOW  | LOW | LOW  | LOW  | LOW  | LOW  | LOW  | LOW      |
| Camelo IY 2020          | HIGH | HIGH | LOW  | LOW  | LOW | LOW  | LOW  | LOW  | HIGH | LOW  | LOW      |
| Campbell K 2020         | HIGH | HIGH | LOW  | LOW  | LOW | LOW  | LOW  | LOW  | HIGH | LOW  | LOW      |
| Cao D 2020              | HIGH | HIGH | LOW  | LOW  | LOW | HIGH | LOW  | LOW  | LOW  | LOW  | LOW      |
| Cardona-Perez JA 2021   | HIGH | LOW  | LOW  | LOW  | LOW | LOW  | LOW  | LOW  | HIGH | HIGH | LOW      |
| Carrasco I 2021         | HIGH | HIGH | LOW  | LOW  | LOW | LOW  | LOW  | LOW  | LOW  | LOW  | LOW      |
| Carreras SU 2020        | HIGH | HIGH | LOW  | LOW  | LOW | LOW  | LOW  | LOW  | HIGH | LOW  | LOW      |
| Cavaliere AF (1) 2020   | HIGH | HIGH | LOW  | LOW  | LOW | HIGH | LOW  | LOW  | HIGH | LOW  | MODERATE |
| Celik T 2021            | HIGH | HIGH | LOW  | LOW  | LOW | LOW  | LOW  | LOW  | LOW  | LOW  | LOW      |
| Cerbulo-Vazquez A 2020  | HIGH | HIGH | HIGH | LOW  | LOW | LOW  | LOW  | LOW  | HIGH | LOW  | MODERATE |
| Ceulemans D 2020        | HIGH | LOW  | LOW  | LOW  | LOW | HIGH | LOW  | HIGH | HIGH | LOW  | MODERATE |
| Ceulemans M (2) 2020    | LOW  | HIGH | LOW  | LOW  | LOW | LOW  | HIGH | LOW  | HIGH | LOW  | LOW      |
| Charki S 2021           | HIGH | LOW  | LOW  | LOW  | LOW | LOW  | LOW  | LOW  | LOW  | LOW  | LOW      |
| Chaudhary S 2020        | HIGH | HIGH | LOW  | LOW  | LOW | LOW  | LOW  | LOW  | HIGH | LOW  | LOW      |
| Chen L 2020             | HIGH | HIGH | LOW  | LOW  | LOW | HIGH | LOW  | LOW  | HIGH | HIGH | MODERATE |
| Cheng B 2020            | HIGH | HIGH | HIGH | LOW  | LOW | LOW  | LOW  | HIGH | HIGH | LOW  | MODERATE |
| Chisolm T 2021          | HIGH | LOW  | LOW  | LOW  | LOW | LOW  | LOW  | LOW  | HIGH | LOW  | LOW      |
| Chowdhury L 2021        | HIGH | HIGH | LOW  | LOW  | LOW | LOW  | LOW  | LOW  | HIGH | HIGH | MODERATE |
| Chowdhury TI 2021       | HIGH | HIGH | LOW  | LOW  | LOW | HIGH | LOW  | LOW  | LOW  | LOW  | LOW      |
| Cojocar L 2020          | HIGH | HIGH | LOW  | LOW  | LOW | LOW  | LOW  | LOW  | HIGH | LOW  | LOW      |
| Colon-Aponte C (1) 2021 | HIGH | HIGH | LOW  | LOW  | LOW | LOW  | LOW  | LOW  | LOW  | LOW  | LOW      |
| Colon-Aponte C 2021     | HIGH | HIGH | LOW  | LOW  | LOW | LOW  | LOW  | LOW  | LOW  | LOW  | LOW      |
| Cornejo N 2020          | HIGH | LOW  | LOW  | LOW  | LOW | HIGH | LOW  | LOW  | LOW  | LOW  | LOW      |

|                                 |      |      |      |     |      |       |      |     |      |      |          |
|---------------------------------|------|------|------|-----|------|-------|------|-----|------|------|----------|
| Coronado-Arroyo JC<br>2020      | HIGH | HIGH | LOW  | LOW | LOW  | HIGH  | LOW  | LOW | LOW  | LOW  | LOW      |
| Cosma S (1) 2020                | HIGH | HIGH | LOW  | LOW | LOW  | HIGH  | LOW  | LOW | HIGH | LOW  | MODERATE |
| Cosma S (2) 2021                | HIGH | HIGH | LOW  | LOW | LOW  | HIGH  | LOW  | LOW | HIGH | LOW  | MODERATE |
| Cosma S (3) 2021                |      | HIGH | LOW  | LOW | LOW  | LOW   | HIGH | LOW | LOW  | LOW  | LOW      |
| Cosma S 2020                    | HIGH | LOW  | LOW  | LOW | LOW  | LOW   | LOW  | LOW | HIGH | LOW  | LOW      |
| COVID-NET June 21               | HIGH | HIGH | LOW  | LOW | LOW  | HIGH  | LOW  | LOW | HIGH | HIGH | MODERATE |
| Cribiu FM (1) 2021              | HIGH | LOW  | LOW  | LOW | LOW  | HIGH  | LOW  | LOW | LOW  | HIGH | LOW      |
| Cronin S 2020                   | HIGH | LOW  | LOW  | LOW | LOW  | LOW   | LOW  | LOW | HIGH | LOW  | LOW      |
| Crosland A 2021                 | HIGH | LOW  | LOW  | LOW | LOW  | LOW   | LOW  | LOW | HIGH | LOW  | LOW      |
| Crovetto F (1) 2021             | HIGH | LOW  | LOW  | LOW | LOW  | LOW   | LOW  | LOW | HIGH | HIGH | LOW      |
| Crovetto F 2020                 | HIGH | LOW  | LOW  | LOW | LOW  | HIGH  | LOW  | LOW | HIGH | LOW  | LOW      |
| Cruz-Lemini M 2021              | LOW  | HIGH | LOW  | LOW | LOW  | LOW   | LOW  | LOW | LOW  | LOW  | LOW      |
| Cubas JAC (1) 2020              | HIGH | HIGH | LOW  | LOW | LOW  | HIGH  | LOW  | LOW | LOW  | LOW  | LOW      |
| Cubo AM 2020                    | HIGH | LOW  | LOW  | LOW | LOW  | HIGH  | LOW  | LOW | HIGH | LOW  | LOW      |
| Cuifang F 2020                  | HIGH | HIGH | HIGH | LOW | LOW  | HIGH  | LOW  | LOW | LOW  | LOW  | MODERATE |
| Cuñarro-López Y 2020            | HIGH | HIGH | LOW  | LOW | LOW  | LOW   | LOW  | LOW | HIGH | LOW  | LOW      |
| Curi B 2020                     | HIGH | HIGH | LOW  | LOW | LOW  | HIGH  | LOW  | LOW | HIGH | LOW  | MODERATE |
| D'Ambrosi F 2021                | HIGH | LOW  | LOW  | LOW | LOW  | LOW   | LOW  | LOW | HIGH | LOW  | LOW      |
| D'Antonio F 2021                | LOW  | HIGH | LOW  | LOW | LOW  | LOW   | LOW  | LOW | LOW  | HIGH | LOW      |
| Dawood M I 2021                 | HIGH | HIGH | LOW  | LOW | LOW  | HIGH  | LOW  | LOW | HIGH | HIGH | MODERATE |
| de la Cruz Conty ML<br>2021     | LOW  | HIGH | LOW  | LOW | LOW  | LOW   | LOW  | LOW | LOW  | LOW  | LOW      |
| de Souza Santos D 2020          | HIGH | HIGH | HIGH | LOW | HIGH | HIGH  | LOW  | LOW | HIGH | LOW  | MODERATE |
| de Vasconcelos Gaspar<br>A 2021 | HIGH | HIGH | LOW  | LOW | LOW  | HIGH  | LOW  | LOW | LOW  | LOW  | LOW      |
| Debelenko L 2021                | HIGH | HIGH | LOW  | LOW | LOW  | HIGH? | LOW  | LOW | LOW  | LOW  | LOW      |
| DeBolt CA 2020                  | HIGH | HIGH | LOW  | LOW | LOW  | LOW   | LOW  | LOW | HIGH | LOW  | LOW      |
| Delahoy MJ 2020                 | HIGH | HIGH | LOW  | LOW | LOW  | HIGH  | LOW  | LOW | HIGH | HIGH | MODERATE |
| Deng Q 2021                     | HIGH | HIGH | HIGH | LOW | LOW  | LOW   | LOW  | LOW | HIGH | LOW  | MODERATE |

|                             |      |      |      |     |     |      |     |      |      |      |          |
|-----------------------------|------|------|------|-----|-----|------|-----|------|------|------|----------|
| Dhuyvetter A 2020           | HIGH | HIGH | LOW  | LOW | LOW | LOW  | LOW | LOW  | HIGH | LOW  | LOW      |
| Di Guardo F 2020            | HIGH | LOW  | LOW  | LOW | LOW | LOW  | LOW | LOW  | LOW  | LOW  | LOW      |
| Di Martino D 2020           | HIGH | HIGH | LOW  | LOW | LOW | LOW  | LOW | LOW  | HIGH | LOW  | LOW      |
| Di Mascio D (1) 2020        | LOW  | HIGH | LOW  | LOW | LOW | LOW  | LOW | LOW  | HIGH | HIGH | LOW      |
| Diaz-Corvillon P 2020       | HIGH | LOW  | LOW  | LOW | LOW | LOW  | LOW | LOW  | LOW  | LOW  | LOW      |
| Dingom MAN 2020             | HIGH | HIGH | LOW  | LOW | LOW | LOW  | LOW | LOW  | HIGH | LOW  | LOW      |
| Dodesini AR 2020            | HIGH | HIGH | LOW  | LOW | LOW | HIGH | LOW | LOW  | HIGH | LOW  | MODERATE |
| Donadieu D 2020             | HIGH | HIGH | LOW  | LOW | LOW | HIGH | LOW | LOW  | HIGH | LOW  | MODERATE |
| Dong Y 2020                 | LOW  | HIGH | LOW  | LOW | LOW | HIGH | LOW | HIGH | HIGH | LOW  | MODERATE |
| Doria M 2020                | HIGH | LOW  | LOW  | LOW | LOW | HIGH | LOW | LOW  | HIGH | LOW  | LOW      |
| Dotters-Katz S 2020         | HIGH | HIGH | LOW  | LOW | LOW | LOW  | LOW | LOW  | HIGH | LOW  | LOW      |
| Dubelbeiss E 2021           | HIGH | HIGH | LOW  | LOW | LOW | HIGH | LOW | LOW  | LOW  | LOW  | LOW      |
| Duffy C 2020                | HIGH | HIGH | LOW  | LOW | LOW | HIGH | LOW | LOW  | HIGH | LOW  | MODERATE |
| Dumitriu D 2020             | HIGH | HIGH | LOW  | LOW | LOW | LOW  | LOW | LOW  | LOW  | LOW  | LOW      |
| Easter SR 2020              | LOW  | HIGH | LOW  | LOW | LOW | HIGH | LOW | LOW  | HIGH | LOW  | LOW      |
| Edlow AG 2020               | HIGH | HIGH | LOW  | LOW | LOW | LOW  | LOW | LOW  | HIGH | LOW  | LOW      |
| Egerup P (1) 2020           | HIGH | HIGH | LOW  | LOW | LOW | LOW  | LOW | LOW  | HIGH | LOW  | LOW      |
| Elenga N 2021               | HIGH | LOW  | LOW  | LOW | LOW | LOW  | LOW | LOW  | HIGH | LOW  | LOW      |
| Emeruwa U (1) 2020          | HIGH | HIGH | LOW  | LOW | LOW | LOW  | LOW | LOW  | LOW  | LOW  | LOW      |
| Emeruwa U (2) 2021          | HIGH | LOW  | LOW  | LOW | LOW | LOW  | LOW | LOW  | LOW  | LOW  | LOW      |
| Emeruwa U 2020              | HIGH | LOW  | LOW  | LOW | LOW | LOW  | LOW | LOW  | HIGH | LOW  | LOW      |
| Encinas Pardilla MB<br>2020 | LOW  | LOW  | LOW  | LOW | LOW | HIGH | LOW | LOW  | HIGH | LOW  | LOW      |
| Erol Koc EM 2020            | HIGH | HIGH | LOW  | LOW | LOW | LOW  | LOW | LOW  | LOW  | LOW  | LOW      |
| Erol SA 2020                | HIGH | HIGH | HIGH | LOW | LOW | LOW  | LOW | LOW  | HIGH | HIGH | MODERATE |
| Fabre Estremera M<br>2020   | HIGH | LOW  | LOW  | LOW | LOW | HIGH | LOW | LOW  | HIGH | LOW  | LOW      |
| Facchetti F 2020            | HIGH | HIGH | HIGH | LOW | LOW | HIGH | LOW | LOW  | LOW  | LOW  | MODERATE |
| Farghaly MAA 2020           | HIGH | HIGH | HIGH | LOW | LOW | LOW  | LOW | LOW  | LOW  | LOW  | LOW      |
| Farhat AS 2020              | HIGH | HIGH | HIGH | LOW | LOW | HIGH | LOW | LOW  | LOW  | LOW  | MODERATE |

|                                         |      |      |      |     |     |      |     |      |      |      |          |
|-----------------------------------------|------|------|------|-----|-----|------|-----|------|------|------|----------|
| Fashner J 2020                          | HIGH | HIGH | LOW  | LOW | LOW | HIGH | LOW | LOW  | LOW  | LOW  | LOW      |
| Fassett MJ 2020                         | HIGH | LOW  | LOW  | LOW | LOW | LOW  | LOW | LOW  | HIGH | LOW  | LOW      |
| Fernández ABS 2020                      | HIGH | HIGH | LOW  | LOW | LOW | LOW  | LOW | LOW  | HIGH | HIGH | MODERATE |
| Ferrazzi E (1) 2020                     | HIGH | HIGH | LOW  | LOW | LOW | LOW  | LOW | LOW  | LOW  | LOW  | LOW      |
| Ferrazzi E (2) 2020                     | HIGH | LOW  | LOW  | LOW | LOW | HIGH | LOW | LOW  | HIGH | LOW  | LOW      |
| Figueiredo R (1) 2020                   | HIGH | LOW  | LOW  | LOW | LOW | LOW  | LOW | LOW  | LOW  | LOW  | LOW      |
| Finnegan C 2021                         | HIGH | HIGH | LOW  | LOW | LOW | LOW  | LOW | LOW  | HIGH | LOW  | LOW      |
| Flaherman VJ 2020                       | LOW  | HIGH | LOW  | LOW | LOW | HIGH | LOW | LOW  | LOW  | LOW  | LOW      |
| Flannery DD (1) 2020                    | HIGH | LOW  | LOW  | LOW | LOW | HIGH | LOW | LOW  | LOW  | LOW  | LOW      |
| Flannery DD, 2020                       | HIGH | HIGH | LOW  | LOW | LOW | HIGH | LOW | LOW  | LOW  | LOW  | LOW      |
| Forde B (1) 2021                        | HIGH | LOW  | LOW  | LOW | LOW | LOW  | LOW | LOW  | HIGH | LOW  | LOW      |
| Forde B 2021                            | HIGH | LOW  | LOW  | LOW | LOW | LOW  | LOW | LOW  | HIGH | LOW  | LOW      |
| Fox N 2020                              | HIGH | HIGH | LOW  | LOW | LOW | HIGH | LOW | HIGH | HIGH | LOW  | MODERATE |
| Franchi M (2) 2020                      | HIGH | LOW  | LOW  | LOW | LOW | HIGH | LOW | LOW  | HIGH | HIGH | MODERATE |
| Gagliardi L 2020                        | HIGH | LOW  | LOW  | LOW | LOW | HIGH | LOW | LOW  | HIGH | LOW  | LOW      |
| Galang RR (1) 2021                      | LOW  | HIGH | LOW  | LOW | LOW | HIGH | LOW | LOW  | HIGH | LOW  | LOW      |
| Garcia-Flores V, 2021                   | HIGH | HIGH | LOW  | LOW | LOW | LOW  | LOW | LOW  | LOW  | LOW  | LOW      |
| Ghema K 2021                            | HIGH | HIGH | LOW  | LOW | LOW | LOW  | LOW | LOW  | LOW  | LOW  | LOW      |
| Giannini A 2020                         | HIGH | HIGH | HIGH | LOW | LOW | HIGH | LOW | LOW  | HIGH | LOW  | MODERATE |
| Gobierno de Mexico<br>(December update) | LOW  | HIGH | LOW  | LOW | LOW | HIGH | LOW | LOW  | HIGH | LOW  | LOW      |
| Gold S (2) 2021                         | HIGH | LOW  | LOW  | LOW | LOW | HIGH | LOW | LOW  | HIGH | LOW  | LOW      |
| Gold S 2021                             | HIGH | HIGH | LOW  | LOW | LOW | HIGH | LOW | LOW  | LOW  | LOW  | LOW      |
| Goldfarb IT (1) 2020                    | HIGH | HIGH | LOW  | LOW | LOW | LOW  | LOW | LOW  | HIGH | LOW  | LOW      |
| Goldfarb IT 2020                        | HIGH | HIGH | HIGH | LOW | LOW | LOW  | LOW | LOW  | HIGH | LOW  | MODERATE |
| Goulding AN 2021                        | HIGH | HIGH | LOW  | LOW | LOW | HIGH | LOW | LOW  | HIGH | LOW  | MODERATE |
| Grados IZ 2021                          | HIGH | LOW  | LOW  | LOW | LOW | HIGH | LOW | LOW  | HIGH | LOW  | LOW      |
| Grechukhina O 2020                      | HIGH | HIGH | LOW  | LOW | LOW | LOW  | LOW | LOW  | HIGH | HIGH | MODERATE |
| Griffin I 2020                          | HIGH | HIGH | LOW  | LOW | LOW | HIGH | LOW | LOW  | HIGH | LOW  | MODERATE |
| Gulersen M (1) 2020                     | HIGH | LOW  | LOW  | LOW | LOW | LOW  | LOW | LOW  | LOW  | LOW  | LOW      |

|                           |      |      |      |     |     |      |     |     |      |      |          |
|---------------------------|------|------|------|-----|-----|------|-----|-----|------|------|----------|
| Guo Y 2021                | HIGH | HIGH | LOW  | LOW | LOW | LOW  | LOW | LOW | LOW  | LOW  | LOW      |
| Haizler-Cohen L (1) 2021  | HIGH | HIGH | LOW  | LOW | LOW | HIGH | LOW | LOW | HIGH | LOW  | MODERATE |
| Halici-Ozturk F 2021      | HIGH | HIGH | LOW  | LOW | LOW | HIGH | LOW | LOW | LOW  | LOW  | LOW      |
| Hamed E 2020              | LOW  | HIGH | LOW  | LOW | LOW | HIGH | LOW | LOW | HIGH | LOW  | LOW      |
| Handley SC 2021           | HIGH | HIGH | LOW  | LOW | LOW | HIGH | LOW | LOW | LOW  | LOW  | LOW      |
| Hassan N 2020             | HIGH | HIGH | LOW  | LOW | LOW | LOW  | LOW | LOW | LOW  | LOW  | LOW      |
| Haye MT, 2021             | HIGH | HIGH | LOW  | LOW | LOW | LOW  | LOW | LOW | HIGH | HIGH | MODERATE |
| Hazari K 2020             | HIGH | LOW  | LOW  | LOW | LOW | LOW  | LOW | LOW | HIGH | HIGH | LOW      |
| Hcini N 2020              | HIGH | LOW  | LOW  | LOW | LOW | LOW  | LOW | LOW | HIGH | LOW  | LOW      |
| He M 2020                 | HIGH | HIGH | LOW  | LOW | LOW | LOW  | LOW | LOW | LOW  | LOW  | LOW      |
| Hecht J 2020              | HIGH | HIGH | LOW  | LOW | LOW | LOW  | LOW | LOW | LOW  | LOW  | LOW      |
| Hernandez OB 2020         | LOW  | HIGH | LOW  | LOW | LOW | LOW  | LOW | LOW | HIGH | LOW  | LOW      |
| Hernandez-Cruz RG<br>2021 | HIGH | LOW  | LOW  | LOW | LOW | HIGH | LOW | LOW | HIGH | LOW  | LOW      |
| Herraiz I 2020            | HIGH | LOW  | LOW  | LOW | LOW | LOW  | LOW | LOW | LOW  | LOW  | LOW      |
| Hossain I 2020            | HIGH | HIGH | LOW  | LOW | LOW | LOW  | LOW | LOW | HIGH | LOW  | LOW      |
| Hostage JC 2021           | HIGH | HIGH | LOW  | LOW | LOW | LOW  | LOW | LOW | HIGH | LOW  | LOW      |
| Huerta Saenz IH 2020      | HIGH | HIGH | LOW  | LOW | LOW | LOW  | LOW | LOW | HIGH | LOW  | LOW      |
| Ibrahim SA 2021           | HIGH | LOW  | LOW  | LOW | LOW | LOW  | LOW | LOW | HIGH | LOW  | LOW      |
| Igbinosa I (1) 2020       | HIGH | LOW  | LOW  | LOW | LOW | LOW  | LOW | LOW | HIGH | LOW  | LOW      |
| Izewski J 2021            | HIGH | LOW  | LOW  | LOW | LOW | HIGH | LOW | LOW | LOW  | LOW  | LOW      |
| Jaiswala N 2021           | HIGH | LOW  | LOW  | LOW | LOW | HIGH | LOW | LOW | LOW  | LOW  | LOW      |
| Janevic T 2021            | HIGH | LOW  | LOW  | LOW | LOW | HIGH | LOW | LOW | LOW  | LOW  | LOW      |
| Jani S 2021               | HIGH | HIGH | LOW  | LOW | LOW | HIGH | LOW | LOW | LOW  | LOW  | LOW      |
| Janssen O 2020            | HIGH | LOW  | LOW  | LOW | LOW | LOW  | LOW | LOW | LOW  | LOW  | LOW      |
| Jenabi E 2020             | HIGH | HIGH | HIGH | LOW | LOW | HIGH | LOW | LOW | LOW  | LOW  | MODERATE |
| Jering KS 2021            | HIGH | HIGH | LOW  | LOW | LOW | HIGH | LOW | LOW | LOW  | LOW  | LOW      |
| Jiménez-Lozano I 2021     | HIGH | HIGH | LOW  | LOW | LOW | LOW  | LOW | LOW | LOW  | LOW  | LOW      |
| Joseph N 2020             | HIGH | LOW  | LOW  | LOW | LOW | LOW  | LOW | LOW | LOW  | LOW  | LOW      |
| Joshi SD 2020             | HIGH | HIGH | LOW  | LOW | LOW | LOW  | LOW | LOW | LOW  | LOW  | LOW      |

|                          |      |      |      |      |      |      |     |     |      |      |          |
|--------------------------|------|------|------|------|------|------|-----|-----|------|------|----------|
| Kalafat E (1) 2020       | HIGH | LOW  | LOW  | LOW  | LOW  | HIGH | LOW | LOW | HIGH | LOW  | LOW      |
| Kalamdani P 2020         | HIGH | HIGH | LOW  | LOW  | LOW  | LOW  | LOW | LOW | LOW  | LOW  | LOW      |
| Kamali A 2021            | HIGH | HIGH | LOW  | LOW  | LOW  | LOW  | LOW | LOW | HIGH | LOW  | LOW      |
| Kawamura H 2021          | HIGH | HIGH | LOW  | LOW  | LOW  | LOW  | LOW | LOW | HIGH | LOW  | LOW      |
| Kayem G 2020             | HIGH | HIGH | LOW  | LOW  | LOW  | LOW  | LOW | LOW | HIGH | LOW  | LOW      |
| Kelly JC (1) 2020        | HIGH | LOW  | LOW  | LOW  | LOW  | LOW  | LOW | LOW | HIGH | LOW  | LOW      |
| Kerala multicenter study | HIGH | HIGH | LOW  | LOW  | LOW  | LOW  | LOW | LOW | HIGH | LOW  | LOW      |
| Khalil A (2), 2020       | HIGH | HIGH | LOW  | LOW  | LOW  | LOW  | LOW | LOW | LOW  | LOW  | LOW      |
| khalil A 2020            | HIGH | LOW  | LOW  | LOW  | LOW  | HIGH | LOW | LOW | HIGH | HIGH | MODERATE |
| Khan MA 2020             | HIGH | LOW  | LOW  | LOW  | LOW  | HIGH | LOW | LOW | LOW  | LOW  | LOW      |
| Khan S (1) 2020          | HIGH | HIGH | LOW  | LOW  | LOW  | HIGH | LOW | LOW | LOW  | LOW  | LOW      |
| Khoury R 2020            | HIGH | HIGH | LOW  | LOW  | LOW  | LOW  | LOW | LOW | LOW  | LOW  | LOW      |
| Kiappe OP 2021           | HIGH | HIGH | LOW  | LOW  | LOW  | LOW  | LOW | LOW | LOW  | LOW  | LOW      |
| Knight M (2) 2021        | LOW  | HIGH | LOW  | LOW  | LOW  | HIGH | LOW | LOW | HIGH | LOW  | LOW      |
| Knight M 2020            | LOW  | HIGH | LOW  | LOW  | HIGH | LOW  | LOW | LOW | HIGH | HIGH | MODERATE |
| Krogstad P 2021          | HIGH | HIGH | LOW  | LOW  | LOW  | LOW  | LOW | LOW | LOW  | LOW  | LOW      |
| Kuzan TY 2021            | HIGH | HIGH | LOW  | LOW  | LOW  | LOW  | LOW | LOW | HIGH | LOW  | LOW      |
| LaCourse S 2020          | HIGH | HIGH | LOW  | LOW  | LOW  | LOW  | LOW | LOW | HIGH | LOW  | LOW      |
| Lang LK 2020             | HIGH | HIGH | LOW  | LOW  | LOW  | HIGH | LOW | LOW | HIGH | LOW  | MODERATE |
| Leon-Abarca JA 2020      | LOW  | HIGH | LOW  | LOW  | LOW  | HIGH | LOW | LOW | HIGH | LOW  | LOW      |
| Levitan D 2021           | HIGH | HIGH | LOW  | LOW  | LOW  | HIGH | LOW | LOW | LOW  | LOW  | LOW      |
| Li N 2020                | HIGH | HIGH | LOW  | LOW  | LOW  | HIGH | LOW | LOW | LOW  | LOW  | LOW      |
| Liao J 2020              | HIGH | LOW  | HIGH | HIGH | LOW  | HIGH | LOW | LOW | HIGH | LOW  | MODERATE |
| Lira-Lucio JA 2020       | LOW  | HIGH | LOW  | LOW  | LOW  | HIGH | LOW | LOW | HIGH | LOW  | LOW      |
| Liu C 2021               | HIGH | LOW  | LOW  | LOW  | LOW  | LOW  | LOW | LOW | LOW  | LOW  | LOW      |
| Liu F (1) 2020           | HIGH | HIGH | HIGH | LOW  | LOW  | HIGH | LOW | LOW | LOW  | LOW  | MODERATE |
| Liu F 2020               | HIGH | LOW  | HIGH | LOW  | LOW  | HIGH | LOW | LOW | HIGH | LOW  | MODERATE |
| Liu P 2020               | HIGH | HIGH | LOW  | LOW  | LOW  | LOW  | LOW | LOW | LOW  | LOW  | LOW      |
| Liu W (1) 2020           | HIGH | HIGH | LOW  | LOW  | LOW  | LOW  | LOW | LOW | LOW  | LOW  | LOW      |

|                                  |      |      |      |     |      |      |     |      |      |      |          |
|----------------------------------|------|------|------|-----|------|------|-----|------|------|------|----------|
| Liu W (2) 2020                   | HIGH | HIGH | HIGH | LOW | LOW  | HIGH | LOW | LOW  | LOW  | LOW  | MODERATE |
| Llorca J 2020                    | HIGH | HIGH | LOW  | LOW | LOW  | LOW  | LOW | LOW  | HIGH | LOW  | LOW      |
| Lokken E 2020                    | HIGH | HIGH | LOW  | LOW | LOW  | LOW  | LOW | HIGH | HIGH | LOW  | MODERATE |
| Lokken EM (1) 2021               | HIGH | HIGH | LOW  | LOW | LOW  | HIGH | LOW | LOW  | HIGH | HIGH | MODERATE |
| Lokken EM (2) 2021               | HIGH | HIGH | LOW  | LOW | LOW  | HIGH | LOW | LOW  | HIGH | LOW  | MODERATE |
| London V 2020                    | HIGH | HIGH | HIGH | LOW | LOW  | LOW  | LOW | LOW  | HIGH | LOW  | MODERATE |
| Lopez M (1) 2020                 | HIGH | HIGH | LOW  | LOW | LOW  | LOW  | LOW | LOW  | LOW  | LOW  | LOW      |
| Lopian M 2020                    | HIGH | HIGH | LOW  | LOW | LOW  | HIGH | LOW | LOW  | LOW  | LOW  | LOW      |
| Lucinde R 2021                   | HIGH | HIGH | LOW  | LOW | LOW  | LOW  | LOW | LOW  | HIGH | LOW  | LOW      |
| Lu-Culligan A 2021               | HIGH | HIGH | LOW  | LOW | LOW  | LOW  | LOW | LOW  | LOW  | LOW  | LOW      |
| Lumbreras-Marquez MI<br>2020     | LOW  | HIGH | LOW  | LOW | LOW  | LOW  | LOW | LOW  | HIGH | LOW  | LOW      |
| Lumley SF 2020                   | HIGH | LOW  | LOW  | LOW | LOW  | LOW  | LOW | LOW  | HIGH | LOW  | LOW      |
| Madden N 2021                    | HIGH | HIGH | LOW  | LOW | LOW  | HIGH | LOW | LOW  | HIGH | LOW  | MODERATE |
| Magnus M 2021                    | LOW  | HIGH | LOW  | LOW | LOW  | HIGH | LOW | LOW  | HIGH | HIGH | MODERATE |
| Mahajan N (2) 2020               | HIGH | HIGH | LOW  | LOW | LOW  | LOW  | LOW | LOW  | HIGH | LOW  | LOW      |
| Malhotra Y (1) 2020              | HIGH | HIGH | LOW  | LOW | LOW  | HIGH | LOW | LOW  | LOW  | LOW  | LOW      |
| Malhotra Y (2) 2021              | HIGH | HIGH | LOW  | LOW | LOW  | LOW  | LOW | LOW  | LOW  | LOW  | LOW      |
| Maraschini A 2020                | LOW  | HIGH | LOW  | LOW | LOW  | LOW  | LOW | HIGH | LOW  | LOW  | LOW      |
| Marín Gabriel MA (2)<br>2020     | HIGH | HIGH | LOW  | LOW | LOW  | LOW  | LOW | LOW  | LOW  | LOW  | LOW      |
| Martinez Portilla RJ (2)<br>2020 | LOW  | HIGH | HIGH | LOW | LOW  | LOW  | LOW | LOW  | HIGH | LOW  | LOW      |
| Martinez-Perez O (2)<br>2021     | LOW  | LOW  | LOW  | LOW | LOW  | LOW  | LOW | LOW  | LOW  | LOW  | LOW      |
| Martinez-Perez O 2020            | HIGH | HIGH | LOW  | LOW | HIGH | LOW  | LOW | HIGH | LOW  | LOW  | MODERATE |
| Martinez-Portilla RJ<br>2020     | LOW  | HIGH | LOW  | LOW | LOW  | LOW  | LOW | LOW  | HIGH | LOW  | LOW      |
| Maru S 2020                      | HIGH | LOW  | LOW  | LOW | LOW  | LOW  | LOW | LOW  | HIGH | LOW  | LOW      |
| Masmejan S 2020                  | HIGH | HIGH | LOW  | LOW | LOW  | HIGH | LOW | LOW  | LOW  | LOW  | LOW      |



|                                |      |      |      |      |     |      |     |     |      |      |          |
|--------------------------------|------|------|------|------|-----|------|-----|-----|------|------|----------|
| Massarotti C 2020              | HIGH | LOW  | LOW  | LOW  | LOW | LOW  | LOW | LOW | HIGH | LOW  | LOW      |
| Mattar CNZ 2020                | LOW  | LOW  | LOW  | LOW  | LOW | LOW  | LOW | LOW | HIGH | LOW  | LOW      |
| Mattern J 2020                 | HIGH | LOW  | LOW  | LOW  | LOW | LOW  | LOW | LOW | HIGH | LOW  | LOW      |
| McCabe M 2021                  | HIGH | HIGH | LOW  | LOW  | LOW | HIGH | LOW | LOW | HIGH | LOW  | MODERATE |
| McKinney JR 2021               | HIGH | HIGH | LOW  | LOW  | LOW | LOW  | LOW | LOW | HIGH | LOW  | LOW      |
| McLaren Jr. R 2021             | HIGH | HIGH | LOW  | LOW  | LOW | HIGH | LOW | LOW | LOW  | LOW  | LOW      |
| Mendoza M 2020                 | HIGH | HIGH | LOW  | LOW  | LOW | LOW  | LOW | LOW | HIGH | LOW  | LOW      |
| Menezes MO 2020                | LOW  | HIGH | LOW  | LOW  | LOW | LOW  | LOW | LOW | HIGH | LOW  | LOW      |
| Mercedes BR 2020               | HIGH | HIGH | LOW  | LOW  | LOW | LOW  | LOW | LOW | LOW  | LOW  | LOW      |
| Metkari AM 2020                | HIGH | LOW  | LOW  | LOW  | LOW | HIGH | LOW | LOW | HIGH | HIGH | MODERATE |
| Metz TD (1) 2021               | HIGH | HIGH | LOW  | LOW  | LOW | LOW  | LOW | LOW | LOW  | LOW  | LOW      |
| Miller E 2020                  | HIGH | LOW  | LOW  | LOW  | LOW | HIGH | LOW | LOW | HIGH | LOW  | LOW      |
| Milln J 2020                   | HIGH | HIGH | LOW  | LOW  | LOW | LOW  | LOW | LOW | HIGH | LOW  | LOW      |
| Moghadam SA 2020               | HIGH | HIGH | LOW  | LOW  | LOW | LOW  | LOW | LOW | LOW  | LOW  | LOW      |
| Mohammed A 2021                | HIGH | HIGH | LOW  | LOW  | LOW | LOW  | LOW | LOW | LOW  | HIGH | LOW      |
| Mohr-Sasson A 2020             | HIGH | HIGH | LOW  | LOW  | LOW | HIGH | LOW | LOW | LOW  | LOW  | LOW      |
| Molenaar NM 2021               | HIGH | LOW  | LOW  | LOW  | LOW | HIGH | LOW | LOW | LOW  | LOW  | LOW      |
| Molina EO 2020                 | HIGH | HIGH | LOW  | LOW  | LOW | LOW  | LOW | LOW | HIGH | LOW  | LOW      |
| Molteni E 2020                 | LOW  | HIGH | LOW  | LOW  | LOW | LOW  | LOW | LOW | HIGH | LOW  | LOW      |
| Money D (1) 2021               | LOW  | HIGH | LOW  | LOW  | LOW | HIGH | LOW | LOW | HIGH | LOW  | LOW      |
| Money D (2) 2021               | LOW  | HIGH | LOW  | LOW  | LOW | LOW  | LOW | LOW | HIGH | HIGH | LOW      |
| Morales NM 2020                | HIGH | HIGH | LOW  | LOW  | LOW | LOW  | LOW | LOW | HIGH | LOW  | LOW      |
| Moreno SC 2020                 | HIGH | HIGH | LOW  | LOW  | LOW | LOW  | LOW | LOW | LOW  | LOW  | LOW      |
| Mostafa A 2021                 | HIGH | HIGH | LOW  | HIGH | LOW | LOW  | LOW | LOW | HIGH | LOW  | MODERATE |
| Mrazguia C 2021                | HIGH | HIGH | LOW  | LOW  | LOW | HIGH | LOW | LOW | HIGH | LOW  | MODERATE |
| Munir SI 2020                  | HIGH | HIGH | LOW  | LOW  | LOW | HIGH | LOW | LOW | HIGH | LOW  | MODERATE |
| Murphy C 2020                  | HIGH | HIGH | LOW  | LOW  | LOW | HIGH | LOW | LOW | LOW  | LOW  | LOW      |
| Nakamura-Pereira M (3)<br>2020 | LOW  | HIGH | LOW  | LOW  | LOW | LOW  | LOW | LOW | LOW  | LOW  | LOW      |
| Nambiar SS (3) 2020            | HIGH | HIGH | LOW? | LOW  | LOW | LOW  | LOW | LOW | HIGH | HIGH | MODERATE |

|                                  |      |      |      |     |      |      |     |     |      |      |          |
|----------------------------------|------|------|------|-----|------|------|-----|-----|------|------|----------|
| Nambiar SS 2020                  | HIGH | HIGH | LOW  | LOW | LOW  | LOW  | LOW | LOW | HIGH | LOW  | LOW      |
| Nanavati R 2021                  | HIGH | HIGH | LOW  | LOW | LOW  | LOW  | LOW | LOW | LOW  | LOW  | LOW      |
| Naqvi M 2020                     | HIGH | HIGH | LOW  | LOW | LOW  | HIGH | LOW | LOW | HIGH | LOW  | MODERATE |
| Nasrallah S 2021                 | HIGH | LOW  | LOW  | LOW | LOW  | LOW  | LOW | LOW | HIGH | LOW  | LOW      |
| Nayak AH 2020                    | HIGH | LOW  | LOW  | LOW | LOW  | LOW  | LOW | LOW | LOW  | LOW  | LOW      |
| Ndubizu C 2021                   | HIGH | LOW  | LOW  | LOW | LOW  | LOW  | LOW | LOW | HIGH | LOW  | LOW      |
| NethOSS 22nd January 2021 update | LOW  | HIGH | LOW  | LOW | HIGH | HIGH | LOW | LOW | HIGH | HIGH | MODERATE |
| Ngalame AN 2020                  | HIGH | HIGH | LOW  | LOW | LOW  | LOW  | LOW | LOW | HIGH | LOW  | LOW      |
| Nie R 2020                       | HIGH | HIGH | HIGH | LOW | LOW  | HIGH | LOW | LOW | HIGH | HIGH | MODERATE |
| Norooznehad AH (1) 2020          | HIGH | HIGH | LOW  | LOW | LOW  | HIGH | LOW | LOW | LOW  | LOW  | LOW      |
| Oakes MC 2021                    | HIGH | HIGH | LOW  | LOW | LOW  | HIGH | LOW | LOW | HIGH | LOW  | MODERATE |
| Ochiai D, 2020                   | HIGH | LOW  | LOW  | LOW | LOW  | HIGH | LOW | LOW | HIGH | LOW  | LOW      |
| Ogamba I 2020                    | HIGH | LOW  | LOW  | LOW | LOW  | LOW  | LOW | LOW | HIGH | LOW  | LOW      |
| Okamura S 2020                   | HIGH | LOW  | LOW  | LOW | LOW  | LOW  | LOW | LOW | HIGH | LOW  | LOW      |
| Omrani AS 2020                   | LOW  | HIGH | LOW  | LOW | LOW  | HIGH | LOW | LOW | HIGH | LOW  | LOW      |
| Ona S (1) 2021                   | HIGH | LOW  | LOW  | LOW | LOW  | HIGH | LOW | LOW | LOW  | LOW  | LOW      |
| Oncel MY 2020                    | LOW  | HIGH | LOW  | LOW | LOW  | LOW  | LOW | LOW | LOW  | LOW  | LOW      |
| Overtoom EM 2020                 | LOW  | HIGH | LOW  | LOW | HIGH | LOW  | LOW | LOW | HIGH | HIGH | MODERATE |
| Oxana Z 2021                     | HIGH | HIGH | LOW  | LOW | LOW  | HIGH | LOW | LOW | LOW  | LOW  | LOW      |
| Ozer KB (1) 2021                 | HIGH | HIGH | LOW  | LOW | LOW  | LOW  | LOW | LOW | HIGH | LOW  | LOW      |
| Ozurmeli M 2021                  | HIGH | HIGH | LOW  | LOW | LOW  | LOW  | LOW | LOW | HIGH | LOW  | LOW      |
| Panagiotakopoulos L 2020         | HIGH | HIGH | LOW  | LOW | LOW  | HIGH | LOW | LOW | HIGH | LOW  | MODERATE |
| Patberg ET 2020                  | HIGH | LOW  | LOW  | LOW | LOW  | HIGH | LOW | LOW | LOW  | LOW  | LOW      |
| Pecks U 2020                     | LOW  | HIGH | LOW  | LOW | LOW  | HIGH | LOW | LOW | HIGH | LOW  | LOW      |
| Peng S 2020                      | HIGH | HIGH | HIGH | LOW | LOW  | LOW  | LOW | LOW | LOW  | LOW  | LOW      |
| Perlman J 2020                   | HIGH | LOW  | LOW  | LOW | LOW  | HIGH | LOW | LOW | LOW  | LOW  | LOW      |
| Pierce-Williams R                | HIGH | HIGH | HIGH | LOW | LOW  | HIGH | LOW | LOW | HIGH | LOW  | MODERATE |

|                             |      |      |      |     |     |      |     |     |      |      |          |
|-----------------------------|------|------|------|-----|-----|------|-----|-----|------|------|----------|
| Pineles BL (1) 2021         | HIGH | HIGH | LOW  | LOW | LOW | HIGH | LOW | LOW | HIGH | LOW  | MODERATE |
| Pineles BL 2020             | HIGH | LOW  | LOW  | LOW | LOW | HIGH | LOW | LOW | LOW  | LOW  | LOW      |
| Pirjani R 2020              | HIGH | HIGH | LOW  | LOW | LOW | LOW  | LOW | LOW | HIGH | LOW  | LOW      |
| Pissarra S 2020             | HIGH | HIGH | LOW  | LOW | LOW | HIGH | LOW | LOW | LOW  | LOW  | LOW      |
| Polat I 2020                | HIGH | HIGH | LOW  | LOW | LOW | LOW  | LOW | LOW | LOW  | LOW  | LOW      |
| Poon L 2021                 | HIGH | HIGH | LOW  | LOW | LOW | LOW  | LOW | LOW | HIGH | HIGH | MODERATE |
| Porpora GM 2021             | HIGH | HIGH | LOW  | LOW | LOW | LOW  | LOW | LOW | LOW  | LOW  | LOW      |
| Prabhu M 2020               | HIGH | LOW  | LOW  | LOW | LOW | LOW  | LOW | LOW | LOW  | LOW  | LOW      |
| Preis H 2021                | LOW  | HIGH | LOW  | LOW | LOW | LOW  | LOW | LOW | LOW  | LOW  | LOW      |
| Qadri F 2020                | HIGH | HIGH | LOW  | LOW | LOW | HIGH | LOW | LOW | HIGH | LOW  | MODERATE |
| Qiancheng X 2020            | HIGH | HIGH | HIGH | LOW | LOW | HIGH | LOW | LOW | HIGH | LOW  | MODERATE |
| Quiner T 2021               | HIGH | HIGH | HIGH | LOW | LOW | HIGH | LOW | LOW | HIGH | LOW  | MODERATE |
| Rahman R 2020               | HIGH | HIGH | LOW  | LOW | LOW | HIGH | LOW | LOW | LOW  | LOW  | LOW      |
| Rahmani M 2021              | HIGH | HIGH | HIGH | LOW | LOW | HIGH | LOW | LOW | HIGH | LOW  | MODERATE |
| Reale SC 2021               | HIGH | LOW  | LOW  | LOW | LOW | LOW  | LOW | LOW | LOW  | LOW  | LOW      |
| Reforma LG 2020             | HIGH | HIGH | HIGH | LOW | LOW | LOW  | LOW | LOW | HIGH | LOW  | MODERATE |
| Remaeus K 2020              | HIGH | HIGH | LOW  | LOW | LOW | HIGH | LOW | LOW | LOW  | LOW  | LOW      |
| Rios-Silva M 2020           | LOW  | HIGH | LOW  | LOW | LOW | LOW  | LOW | LOW | HIGH | LOW  | LOW      |
| Rizzo G 2021                | HIGH | HIGH | LOW  | LOW | LOW | HIGH | LOW | LOW | HIGH | LOW  | MODERATE |
| ROI COVID-19 Update<br>2020 | LOW  | HIGH | LOW  | LOW | LOW | LOW  | LOW | LOW | HIGH | LOW  | LOW      |
| Rolnik DL 2020              | HIGH | LOW  | LOW  | LOW | LOW | LOW  | LOW | LOW | HIGH | LOW  | LOW      |
| Romagano MP 2020            | HIGH | HIGH | LOW  | LOW | LOW | LOW  | LOW | LOW | LOW  | LOW  | LOW      |
| Ronchi A 2020               | HIGH | HIGH | LOW  | LOW | LOW | LOW  | LOW | LOW | LOW  | LOW  | LOW      |
| Rosenbloom JI 2021          | HIGH | LOW  | LOW  | LOW | LOW | HIGH | LOW | LOW | LOW  | LOW  | LOW      |
| Rottenstreich A (1) 2021    | HIGH | LOW  | LOW? | LOW | LOW | LOW  | LOW | LOW | HIGH | LOW  | LOW      |
| Rottenstreich A 2020        | HIGH | HIGH | LOW  | LOW | LOW | LOW  | LOW | LOW | LOW  | LOW  | LOW      |
| Rozo N 2021                 | LOW  | HIGH | LOW  | LOW | LOW | LOW  | LOW | LOW | HIGH | LOW  | LOW      |
| Ruggiero M 2020             | HIGH | HIGH | LOW  | LOW | LOW | LOW  | LOW | LOW | LOW  | LOW  | LOW      |
| Sahin D (2) 2020            | HIGH | HIGH | LOW  | LOW | LOW | LOW  | LOW | LOW | HIGH | HIGH | MODERATE |

|                           |      |      |      |     |      |      |     |     |      |      |          |
|---------------------------|------|------|------|-----|------|------|-----|-----|------|------|----------|
| Sahin D 2020              | HIGH | LOW  | LOW  | LOW | LOW  | LOW  | LOW | LOW | HIGH | LOW  | LOW      |
| Saimin J 2021             | HIGH | HIGH | LOW  | LOW | LOW  | LOW  | LOW | LOW | LOW  | HIGH | LOW      |
| Sakowicz A 2020           | HIGH | HIGH | LOW  | LOW | LOW  | LOW  | LOW | LOW | HIGH | LOW  | LOW      |
| Salvatore CM 2020         | HIGH | HIGH | LOW  | LOW | LOW  | LOW  | LOW | LOW | HIGH | LOW  | LOW      |
| Samadi P 2021             | HIGH | HIGH | LOW  | LOW | LOW  | LOW  | LOW | LOW | HIGH | LOW  | LOW      |
| Sanchez-Luna M 2021       | LOW  | HIGH | LOW  | LOW | LOW  | LOW  | LOW | LOW | LOW  | LOW  | LOW      |
| San-Juan R 2020           | HIGH | HIGH | LOW  | LOW | LOW  | LOW  | LOW | LOW | HIGH | LOW  | LOW      |
| Santana LB 2021           | HIGH | HIGH | LOW  | LOW | LOW  | LOW  | LOW | LOW | LOW  | LOW  | LOW      |
| Santhosh J 2020           | HIGH | HIGH | LOW  | LOW | LOW  | HIGH | LOW | LOW | HIGH | HIGH | MODERATE |
| Santos RR 2020            | HIGH | HIGH | HIGH | LOW | LOW  | LOW  | LOW | LOW | HIGH | LOW  | MODERATE |
| Sattari M 2020            | HIGH | HIGH | LOW  | LOW | LOW  | LOW  | LOW | LOW | HIGH | LOW  | LOW      |
| Savasi V 2020             | HIGH | HIGH | HIGH | LOW | LOW  | LOW  | LOW | LOW | HIGH | LOW  | MODERATE |
| Savirón-Cornudella R 2020 | HIGH | LOW  | LOW  | LOW | LOW  | LOW  | LOW | LOW | LOW  | LOW  | LOW      |
| Sayed SK 2021             | HIGH | HIGH | LOW  | LOW | LOW  | LOW  | LOW | LOW | HIGH | LOW  | LOW      |
| Scott R 2020              | HIGH | HIGH | LOW  | LOW | LOW  | HIGH | LOW | LOW | HIGH | LOW  | MODERATE |
| Sehra R 2021              | HIGH | HIGH | LOW  | LOW | LOW  | LOW  | LOW | LOW | LOW  | LOW  | LOW      |
| Semeshkin AA 2020         | HIGH | LOW  | HIGH | LOW | LOW  | LOW  | LOW | LOW | LOW  | LOW  | LOW      |
| Sentilhes L 2020          | HIGH | HIGH | LOW  | LOW | LOW  | LOW  | LOW | LOW | HIGH | HIGH | MODERATE |
| Servei Català 29/05       | LOW  | HIGH | LOW  | LOW | LOW  | HIGH | LOW | LOW | HIGH | HIGH | MODERATE |
| Servei catalana           | LOW  | HIGH | LOW  | LOW | LOW  | HIGH | LOW | LOW | HIGH | HIGH | MODERATE |
| Shah PT 2020              | HIGH | HIGH | HIGH | LOW | LOW  | LOW  | LOW | LOW | HIGH | LOW  | MODERATE |
| Sharma N 2021             | HIGH | LOW  | LOW  | LOW | LOW  | LOW  | LOW | LOW | HIGH | LOW  | LOW      |
| Sharma R 2021             | HIGH | LOW  | LOW  | LOW | LOW  | HIGH | LOW | LOW | LOW  | LOW  | LOW      |
| Sherer ML 2020            | HIGH | HIGH | HIGH | LOW | LOW  | LOW  | LOW | LOW | HIGH | LOW  | MODERATE |
| Shlomai NO 2021           | HIGH | HIGH | LOW  | LOW | LOW  | HIGH | LOW | LOW | LOW  | LOW  | LOW      |
| Shmakov R 2020            | HIGH | LOW  | LOW  | LOW | LOW  | LOW  | LOW | LOW | HIGH | LOW  | LOW      |
| Singh N 2021              | HIGH | HIGH | LOW  | LOW | LOW  | HIGH | LOW | LOW | LOW  | LOW  | LOW      |
| Singh V (1) 2021          | HIGH | HIGH | LOW  | LOW | LOW  | LOW  | LOW | LOW | HIGH | LOW  | LOW      |
| SIVEP-Gripe 23 May        | LOW  | HIGH | LOW  | LOW | HIGH | HIGH | LOW | LOW | HIGH | LOW  | MODERATE |

|                                         |      |      |      |     |      |      |      |     |      |      |          |
|-----------------------------------------|------|------|------|-----|------|------|------|-----|------|------|----------|
| Smithgall MC 2020                       | HIGH | LOW  | LOW  | LOW | LOW  | LOW  | LOW  | LOW | LOW  | LOW  | LOW      |
| Soffer MD 2020                          | HIGH | HIGH | LOW  | LOW | LOW  | LOW  | LOW  | LOW | HIGH | LOW  | LOW      |
| Solis-Garcia G 2020                     | HIGH | HIGH | LOW  | LOW | LOW  | LOW  | LOW  | LOW | LOW  | LOW  | LOW      |
| Soto-Torres E, 2021                     | HIGH | LOW  | LOW  | LOW | LOW  | HIGH | LOW  | LOW | LOW  | LOW  | LOW      |
| Sri Sri G 2020                          | HIGH | LOW  | LOW  | LOW | LOW  | HIGH | LOW  | LOW | HIGH | LOW  | LOW      |
| Steffen HA 2021                         | HIGH | LOW  | LOW  | LOW | LOW  | HIGH | LOW  | LOW | LOW  | LOW  | LOW      |
| Sterbenc A 2020                         | HIGH | HIGH | LOW  | LOW | LOW  | HIGH | LOW  | LOW | HIGH | LOW  | MODERATE |
| Sun G 2020                              | HIGH | HIGH | LOW  | LOW | LOW  | HIGH | LOW  | LOW | LOW  | LOW  | LOW      |
| Sutton D 2020                           | HIGH | LOW  | HIGH | LOW | LOW  | HIGH | LOW  | LOW | LOW  | LOW  | LOW      |
| Suyuthi FP 2021                         | HIGH | HIGH | LOW  | LOW | LOW  | LOW  | LOW  | LOW | LOW  | LOW  | LOW      |
| Syed S 2020                             | HIGH | HIGH | LOW  | LOW | LOW  | LOW  | LOW  | LOW | LOW  | LOW  | LOW      |
| Takemoto MLS                            | LOW  | HIGH | LOW  | LOW | HIGH | HIGH | LOW  | LOW | HIGH | LOW  | MODERATE |
| Takemoto MLS (2) 2020                   | LOW  | HIGH | LOW  | LOW | LOW  | LOW  | LOW  | LOW | HIGH | LOW  | LOW      |
| Tanacan A 2020                          | HIGH | LOW  | LOW  | LOW | LOW  | LOW  | LOW  | LOW | LOW  | LOW  | LOW      |
| Tanacan A 2021                          | HIGH | HIGH | LOW  | LOW | LOW  | LOW  | LOW  | LOW | HIGH | LOW  | LOW      |
| Tassis B 2020                           | HIGH | LOW  | LOW  | LOW | LOW  | HIGH | HIGH | LOW | HIGH | HIGH | MODERATE |
| Taya RM 2020                            | HIGH | HIGH | HIGH | LOW | LOW  | HIGH | LOW  | LOW | HIGH | LOW  | MODERATE |
| The WAPM Working Group on COVID-19 2021 | LOW  | HIGH | LOW  | LOW | LOW  | LOW  | LOW  | LOW | HIGH | HIGH | LOW      |
| Thiabaud A 2020                         | LOW  | HIGH | LOW  | LOW | LOW  | LOW  | LOW  | LOW | HIGH | LOW  | LOW      |
| Trahan MJ (3) 2021                      | HIGH | HIGH | LOW  | LOW | LOW  | LOW  | LOW  | LOW | LOW  | LOW  | LOW      |
| Trahan MJ 2020                          | HIGH | LOW  | LOW  | LOW | LOW  | LOW  | LOW  | LOW | HIGH | LOW  | LOW      |
| Tsatsaris V 2020                        | HIGH | LOW  | LOW  | LOW | LOW  | LOW  | LOW  | LOW | LOW  | HIGH | LOW      |
| Tug N 2020                              | HIGH | HIGH | LOW  | LOW | LOW  | LOW  | LOW  | LOW | HIGH | LOW  | LOW      |
| Tutiya CT (1) 2021                      | HIGH | HIGH | LOW  | LOW | LOW  | LOW  | LOW  | LOW | HIGH | LOW  | LOW      |
| UKOSS 2020                              | LOW  | HIGH | LOW  | LOW | LOW  | LOW  | LOW  | LOW | HIGH | LOW  | LOW      |
| Ullah R 2020                            | HIGH | HIGH | LOW  | LOW | LOW  | HIGH | LOW  | LOW | HIGH | LOW  | MODERATE |
| USA CDC surveillance (30 June 21)       | LOW  | HIGH | LOW  | LOW | HIGH | HIGH | LOW  | LOW | HIGH | LOW  | MODERATE |

|                            |      |      |      |     |      |       |     |     |      |      |          |
|----------------------------|------|------|------|-----|------|-------|-----|-----|------|------|----------|
| USA SET-NET (6 August 21)  | LOW  | HIGH | LOW  | LOW | HIGH | HIGH  | LOW | LOW | HIGH | LOW  | MODERATE |
| Uzel K 2020                | HIGH | HIGH | LOW  | LOW | LOW  | LOW   | LOW | LOW | HIGH | LOW  | LOW      |
| van Keulen BJ 2020         | HIGH | HIGH | LOW  | LOW | LOW  | LOW   | LOW | LOW | LOW  | LOW  | LOW      |
| Veerus P 2020              | LOW  | LOW  | LOW  | LOW | LOW  | LOW   | LOW | LOW | HIGH | LOW  | LOW      |
| Vera Loyola EM 2020        | HIGH | HIGH | LOW  | LOW | LOW  | LOW   | LOW | LOW | LOW  | LOW  | LOW      |
| Verma S (1) 2020           | HIGH | HIGH | LOW  | LOW | LOW  | LOW   | LOW | LOW | LOW  | LOW  | LOW      |
| Vielma OS 2020             | HIGH | LOW  | LOW  | LOW | LOW  | LOW   | LOW | LOW | LOW  | LOW  | LOW      |
| Vigil-De Gracia P (2) 2020 | HIGH | HIGH | HIGH | LOW | LOW  | HIGH  | LOW | LOW | LOW  | LOW  | MODERATE |
| Vila-Candel R 2021         | HIGH | HIGH | LOW  | LOW | LOW  | LOW   | LOW | LOW | LOW  | LOW  | LOW      |
| Villalain C 2020           | HIGH | HIGH | LOW  | LOW | LOW  | LOW   | LOW | LOW | HIGH | HIGH | MODERATE |
| Villar J 2021              | LOW  | HIGH | LOW  | LOW | LOW  | LOW   | LOW | LOW | HIGH | LOW  | LOW      |
| Vintzileos W 2020          | HIGH | LOW  | LOW  | LOW | LOW  | HIGH  | LOW | LOW | HIGH | HIGH | MODERATE |
| Viñuela MC 2020            | HIGH | LOW  | LOW  | LOW | LOW  | LOW   | LOW | LOW | LOW  | LOW  | LOW      |
| Vivanti A (1) 2020         | HIGH | LOW  | LOW  | LOW | LOW  | LOW   | LOW | LOW | HIGH | LOW  | LOW      |
| Vizheh M 2021              | HIGH | HIGH | LOW  | LOW | LOW  | LOW   | LOW | LOW | HIGH | HIGH | MODERATE |
| Vouga M (1) 2020           | LOW  | HIGH | LOW  | LOW | LOW  | LOW   | LOW | LOW | HIGH | LOW  | LOW      |
| Vousden N 2021             | LOW  | HIGH | LOW  | LOW | LOW  | LOW   | LOW | LOW | HIGH | LOW  | LOW      |
| Waghmare R 2020            | HIGH | LOW  | LOW  | LOW | LOW  | HIGH  | LOW | LOW | HIGH | LOW  | LOW      |
| Wang M 2020                | HIGH | HIGH | LOW  | LOW | LOW  | LOW   | LOW | LOW | LOW  | LOW  | LOW      |
| Wang X (1) 2020            | HIGH | HIGH | LOW  | LOW | LOW  | HIGH? | LOW | LOW | LOW  | LOW  | LOW      |
| Wang Z 2020                | HIGH | HIGH | LOW  | LOW | LOW  | LOW   | LOW | LOW | LOW  | LOW  | LOW      |
| Wei L 2020                 | HIGH | LOW  | LOW  | LOW | LOW  | LOW   | LOW | LOW | HIGH | LOW  | LOW      |
| Wilcox W 2021              | HIGH | HIGH | LOW  | LOW | LOW  | LOW   | LOW | LOW | HIGH | LOW  | LOW      |
| Woodworth KR 2020          | LOW  | HIGH | LOW  | LOW | HIGH | HIGH  | LOW | LOW | HIGH | LOW  | MODERATE |
| Wu Y 2020                  | HIGH | HIGH | LOW  | LOW | LOW  | HIGH  | LOW | LOW | HIGH | HIGH | MODERATE |
| Wu YT                      | HIGH | HIGH | LOW  | LOW | LOW  | LOW   | LOW | LOW | LOW  | LOW  | LOW      |
| Xu R 2021                  | HIGH | HIGH | LOW  | LOW | LOW  | HIGH  | LOW | LOW | HIGH | LOW  | MODERATE |
| Xu S 2020                  | HIGH | HIGH | HIGH | LOW | LOW  | LOW   | LOW | LOW | HIGH | LOW  | MODERATE |

|                  |      |      |      |     |      |      |     |      |      |      |          |
|------------------|------|------|------|-----|------|------|-----|------|------|------|----------|
| Yadav V 2020     | HIGH | HIGH | LOW  | LOW | LOW  | LOW  | LOW | LOW  | LOW  | LOW  | LOW      |
| Yan J 2020       | HIGH | HIGH | HIGH | LOW | LOW  | HIGH | LOW | LOW  | HIGH | HIGH | MODERATE |
| Yang H (2) 2020  | HIGH | HIGH | HIGH | LOW | LOW  | LOW  | LOW | HIGH | HIGH | LOW  | MODERATE |
| Yang H (3) 2020  | HIGH | HIGH | LOW  | LOW | LOW  | LOW  | LOW | LOW  | LOW  | LOW  | LOW      |
| Yang H 2020      | HIGH | LOW  | HIGH | LOW | LOW  | HIGH | LOW | LOW  | LOW  | LOW  | LOW      |
| Yang R 2020      | HIGH | HIGH | LOW  | LOW | LOW  | LOW  | LOW | LOW  | LOW  | LOW  | LOW      |
| Yao R 2021       | HIGH | LOW  | LOW  | LOW | LOW  | LOW  | LOW | LOW  | HIGH | LOW  | LOW      |
| Yarra S 2020     | HIGH | HIGH | LOW  | LOW | LOW  | HIGH | LOW | LOW  | HIGH | LOW  | MODERATE |
| Yassa M (2) 2020 | HIGH | LOW  | LOW  | LOW | LOW  | LOW  | LOW | LOW  | HIGH | LOW  | LOW      |
| Yazihan N 2020   | HIGH | HIGH | HIGH | LOW | LOW  | LOW  | LOW | LOW  | HIGH | HIGH | MODERATE |
| Yin M 2020       | HIGH | HIGH | LOW  | LOW | LOW  | HIGH | LOW | LOW  | HIGH | LOW  | MODERATE |
| Yombi JC 2020    | HIGH | LOW  | LOW  | LOW | LOW  | HIGH | LOW | LOW  | HIGH | LOW  | LOW      |
| Youssef A 2020   | HIGH | HIGH | HIGH | LOW | LOW  | HIGH | LOW | LOW  | HIGH | LOW  | MODERATE |
| Yuan L 2020      | HIGH | HIGH | HIGH | LOW | LOW  | HIGH | LOW | LOW  | HIGH | LOW  | MODERATE |
| Yue L 2020       | HIGH | HIGH | HIGH | LOW | LOW  | HIGH | LOW | LOW  | LOW  | LOW  | MODERATE |
| Zaharie G 2020   | HIGH | LOW  | LOW  | LOW | LOW  | LOW  | LOW | LOW  | LOW  | LOW  | LOW      |
| Zambrano LD 2020 | LOW  | HIGH | LOW  | LOW | HIGH | HIGH | LOW | LOW  | HIGH | LOW  | MODERATE |
| Zeng L 2020      | HIGH | HIGH | HIGH | LOW | LOW  | HIGH | LOW | LOW  | LOW  | LOW  | MODERATE |
| Zeng LK 2021     | HIGH | HIGH | LOW  | LOW | LOW  | LOW  | LOW | LOW  | LOW  | LOW  | LOW      |
| Zeng Y 2020      | HIGH | HIGH | LOW  | LOW | LOW  | HIGH | LOW | LOW  | LOW  | LOW  | LOW      |
| Zhang P 2020     | HIGH | LOW  | LOW  | LOW | LOW  | HIGH | LOW | LOW  | LOW  | LOW  | LOW      |
| Zhang P 2021     | HIGH | LOW  | LOW  | LOW | LOW  | HIGH | LOW | LOW  | LOW  | LOW  | LOW      |
| Zöllkau J 2020   | HIGH | LOW  | HIGH | LOW | LOW  | HIGH | LOW | LOW  | HIGH | LOW  | MODERATE |

**Appendix 5a: Study-level forest plots for prevalence of SARS-CoV-2 infection in pregnant and recently pregnant women by sampling strategy**

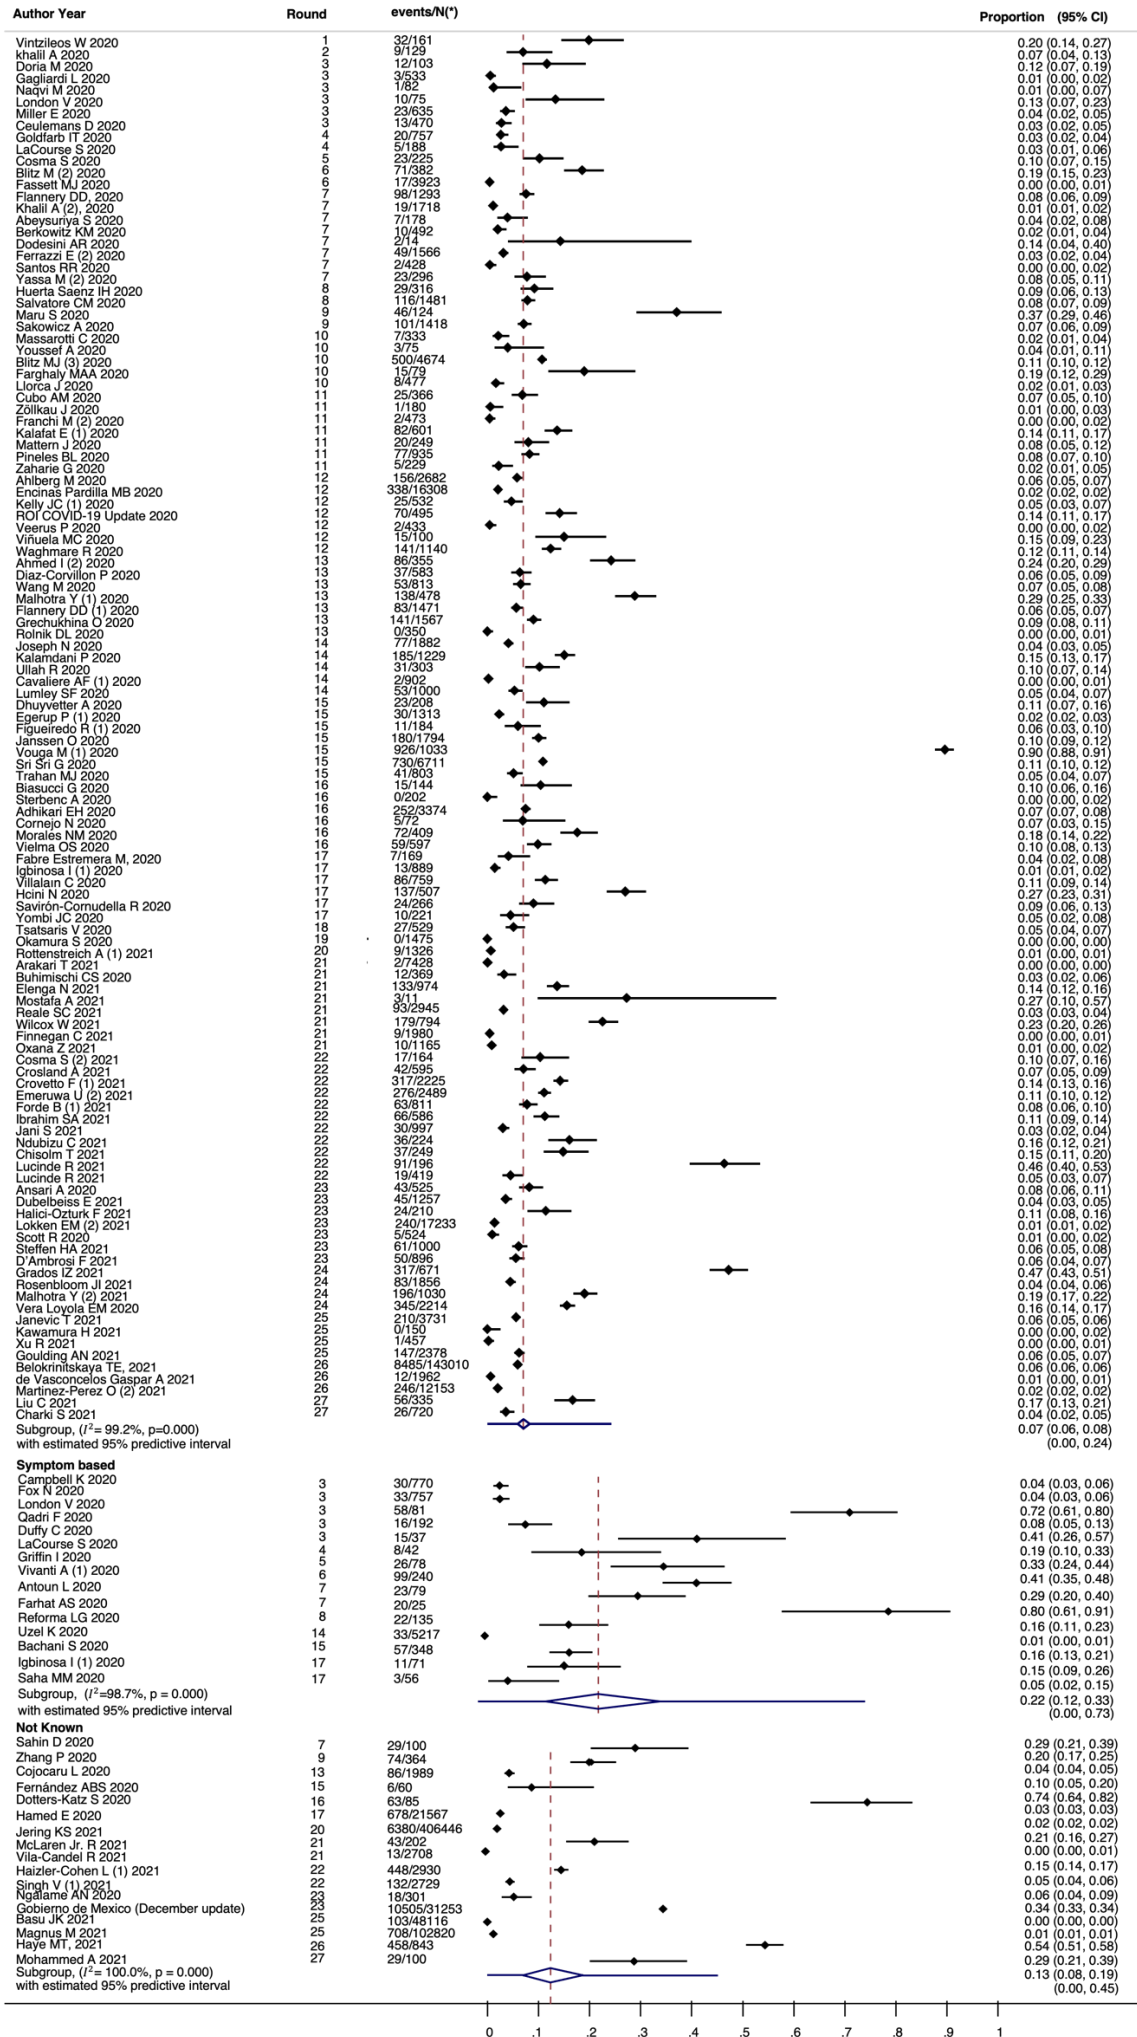



Prevalence of severe acute respiratory syndrome coronavirus 2 in pregnant and recently pregnant women identified by universal screening. Meta-analysis includes one study (Liao 2020) screened using National Health Commission China criteria with no events. Symptom based screening includes screening based on symptoms or history of contact with individuals with covid-19. Round number represents search strategy updates in the living systematic review.

### Appendix 5b: Prevalence of SARS-CoV-2 infection in asymptomatic pregnant and recently pregnant women identified by universal screening strategy

## PCR positive in women without symptoms

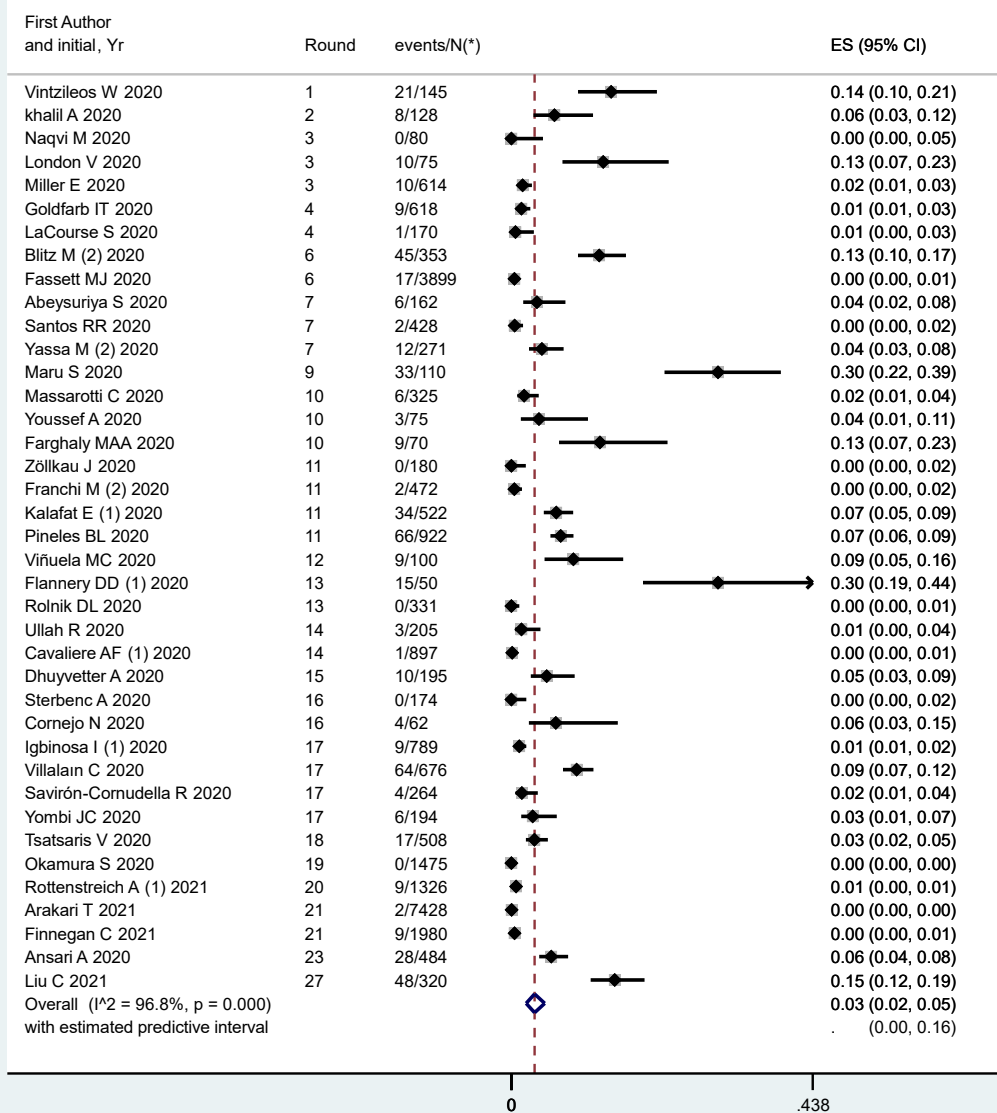

Subgroup of universal screening strategy

ES=Effect size (Rate)

## Appendix 5c: Proportion of COVID-19 diagnosis in universally screened population that are asymptomatic

### PCR positive in women without symptoms

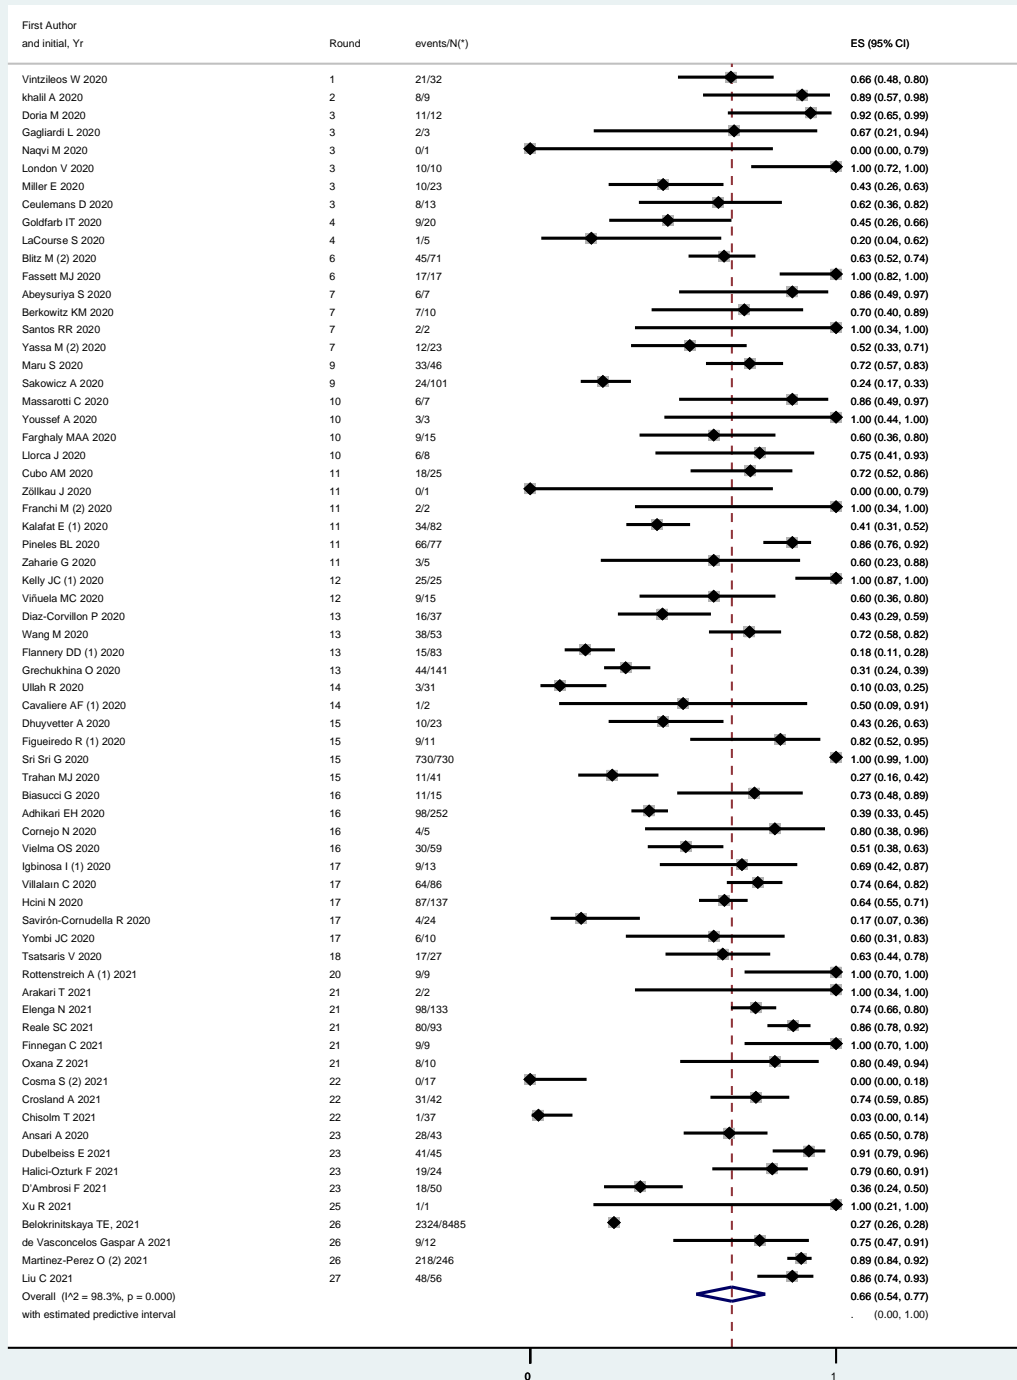

Subgroup of universal screening strategy

ES=Effect size (Rate)

### Appendix 6a: Maternal factors associated with COVID-19 in pregnant (and recently pregnant women)

| Risk factor             | No. of studies | Total No. of women | COVID-19 present n/N | COVID-19 absent n/N | Odds Ratio (95% CI) | I <sup>2</sup> |
|-------------------------|----------------|--------------------|----------------------|---------------------|---------------------|----------------|
| Age ≥ 35yrs             | 61             | 640433             | 14524*               | 625909*             | 0.91 (0.81; 1.02)   | 47.2%          |
| Parity ≥ 1              | 41             | 222651             | 3697/124401          | 2397/98250          | 1.06 (0.96; 1.18)   | 41.6%          |
| BMI ≥ 30                | 47             | 441583             | 12978*               | 428605*             | 1.24 (1.13; 1.37)   | 47.2%          |
| Non-White vs White      | 35             | 616668             | 7237/221772          | 3863/394896         | 2.41 (1.90; 3.06)   | 87.1%          |
| Multiple pregnancy      | 13             | 191654             | 51/5470              | 2279/186184         | 0.86 (0.62; 1.19)   | 0%             |
| Gestation ≥ 28 w        | 3              | 2509               | 1009/1560            | 545/949             | 1.09 (0.66; 1.80)   | 76.8%          |
| Smoking                 | 26             | 429372             | 299/19966            | 10214/409406        | 0.62 (0.44; 0.88)   | 87%            |
| Any co-morbidity        | 17             | 14231              | 743/3228             | 2636/11003          | 1.07 (0.84; 1.37)   | 62.1%          |
| Chronic hypertension    | 36             | 438926             | 529/20824            | 11736/418102        | 1.03 (0.92; 1.15)   | 0.9%           |
| Pre-existing diabetes   | 35             | 430956             | 315/6552             | 12034/424404        | 1.20 (0.95; 1.51)   | 21.8%          |
| Asthma                  | 25             | 17795              | 267/1389             | 3755/16406          | 0.92 (0.68; 1.23)   | 49.5%          |
| Support person positive | 3              | 1250               | 418/533              | 232/717             | 4.49 (0.63; 32.03)  | 93.2%          |
| Gestational diabetes    | 30             | 438422             | 1022/41619           | 10026/396803        | 0.96 (0.80; 1.16)   | 41.5%          |
| Pre-eclampsia           | 27             | 433220             | 859/29112            | 19990/404098        | 1.08 (0.78; 1.50)   | 83.2%          |
| Pregnancy hypertension  | 17             | 415092             | 550/30702            | 7622/384390         | 1.09 (0.83; 1.44)   | 56.5%          |

\*Includes one or more studies with continuous measurement of risk factor. CI – Confidence Interval

### Appendix 6b. Comparison of characteristics of pregnant (and recently pregnant) women with COVID-19 vs non-pregnant reproductive aged women with COVID-19

| Risk factor             | No. of studies | Total No. of women | Pregnant (and recently pregnant) women with COVID-19 n/N | Non-pregnant reproductive aged women with COVID-19 n/N | Odds Ratio (95% CI) | I <sup>2</sup> |
|-------------------------|----------------|--------------------|----------------------------------------------------------|--------------------------------------------------------|---------------------|----------------|
| Age ≥ 35yrs             | 11             | 2302581            | 123843*                                                  | 2178738*                                               | 0.41 (0.30; 0.57)   | 98.9%          |
| BMI ≥ 30                | 8              | 2301999            | 123690*                                                  | 2178309*                                               | 1.22 (0.47; 3.17)   | 99.5%          |
| Non-White vs White      | 3              | 1398642            | 71727/998704                                             | 36080/399938                                           | 0.78 (0.67; 0.90)   | 3%             |
| Any co-morbidity        | 7              | 2139363            | 14198/226359                                             | 104784/1913004                                         | 1.98 (1.09; 3.61)   | 99.5%          |
| Chronic hypertension    | 9              | 2158756            | 920/30875                                                | 120284/2127881                                         | 0.74 (0.49; 1.13)   | 89.8%          |
| Pre-existing diabetes   | 12             | 2302555            | 1610/30052                                               | 122258/2272503                                         | 1.47 (0.93; 2.32)   | 92.6%          |
| Asthma                  | 7              | 552961             | 269/15148                                                | 10791/537813                                           | 0.82 (0.55; 1.24)   | 70.6%          |
| Support person positive | 1              | 43                 | 4/23                                                     | 13/20                                                  | 0.11 (0.03; 0.47)   | NE             |
| Smoking                 | 3              | 552536             | 143/13916                                                | 10641/538620                                           | 0.49 (0.20; 1.21)   | 93.6%          |

\*Includes one or more studies with continuous measurement of risk factor. CI – Confidence Interval

**Appendix 7. Clinical manifestations of coronavirus disease (COVID-19) in pregnant and recently pregnant women with suspected or confirmed disease**

| Clinical manifestations<br>Symptom | Subgroup           | Studies | Events/N(*)  | Proportion (95% CI)  | I-squared    | Range                |       |
|------------------------------------|--------------------|---------|--------------|----------------------|--------------|----------------------|-------|
| Fever                              | All studies        | 120     | 25160/152389 | 0.363 (0.313; 0.415) | 99.4%        | (0.009-1.000)        |       |
|                                    | Risk based         | 16      | 218/529      | 0.396 (0.306; 0.489) | 76.6%        | (0.147-0.688)        |       |
|                                    | NHCC               | 40      | 1253/5356    | 0.206 (0.153; 0.263) | 95.3%        | (0.009-0.569)        |       |
|                                    | Universal          | 18      | 1447/2976    | 0.588 (0.484; 0.688) | 96.2%        | (0.048-0.941)        |       |
|                                    | Symptom based      | 46      | 22242/143528 | 0.415 (0.33; 0.502)  | 99.7%        | (0.073-1.000)        |       |
|                                    | Not known          | 104     | 16702/135469 | 0.366 (0.321; 0.412) | 98.8%        | (0.009-1.000)        |       |
|                                    | Confirmed Covid-19 | 71      | 2037/6776    | 0.352 (0.283; 0.423) | 97.0%        | (0.009-1.000)        |       |
|                                    | Admitted           | 23      | 22342/143052 | 0.412 (0.296; 0.533) | 99.9%        | (0.087-0.880)        |       |
|                                    | All                | 25      | 772/2517     | 0.354 (0.277; 0.434) | 92.7%        | (0.042-1.000)        |       |
|                                    | Selected           | 117     | 25134/152312 | 0.364 (0.313; 0.416) | 99.4%        | (0.009-1.000)        |       |
|                                    | Any risk           | NA      | NA           | NA                   | NA           | NA                   |       |
|                                    | High risk          | 45      | 13341/123928 | 0.332 (0.267; 0.400) | 99.0%        | (0.048-0.778)        |       |
|                                    | HIC                | 68      | 10759/25274  | 0.382 (0.323; 0.443) | 98.4%        | (0.009-1.000)        |       |
|                                    | LMIC               | Cough   | All studies  | 116                  | 36171/151409 | 0.361 (0.309; 0.413) | 99.4% |
| Risk based                         | 16                 |         | 170/529      | 0.325 (0.239; 0.416) | 76.7%        | (0.029-0.647)        |       |
| NHCC                               | 37                 |         | 1331/4610    | 0.233 (0.173; 0.298) | 95.2%        | (0.000-0.621)        |       |
| Universal                          | 17                 |         | 1335/2876    | 0.480 (0.383; 0.578) | 95.4%        | (0.053-0.794)        |       |
| Symptom based                      | 46                 |         | 33335/143394 | 0.436 (0.348; 0.527) | 99.8%        | (0.059-0.818)        |       |
| Not known                          | 101                |         | 26323/135021 | 0.353 (0.307; 0.400) | 98.8%        | (0.000-0.818)        |       |
| Confirmed Covid-19                 | 67                 |         | 1849/5890    | 0.342 (0.279; 0.408) | 95.8%        | (0.015-0.818)        |       |
| Admitted                           | 23                 |         | 33472/142958 | 0.479 (0.354; 0.605) | 99.9%        | (0.153-0.783)        |       |
| All                                | 25                 |         | 841/2517     | 0.307 (0.234; 0.384) | 92.5%        | (0.000-0.765)        |       |
| Selected                           | 113                |         | 36155/151332 | 0.366 (0.314; 0.420) | 99.5%        | (0.015-0.818)        |       |
| Any risk                           | NA                 |         | NA           | NA                   | NA           | NA                   |       |
| High risk                          | 44                 |         | 22048/123839 | 0.380 (0.310; 0.452) | 99.0%        | (0.076-0.783)        |       |
| HIC                                | 66                 |         | 13024/24483  | 0.351 (0.293; 0.411) | 98.3%        | (0.000-0.818)        |       |
| LMIC                               | Dyspnoea           |         | All studies  | 96                   | 14153/143837 | 0.192 (0.163; 0.222) | 98.4% |
| Risk based                         |                    | 11      | 42/392       | 0.095 (0.052; 0.148) | 51.3%        | (0.000-0.258)        |       |
| NHCC                               |                    | 29      | 587/4453     | 0.107 (0.077; 0.141) | 89.1%        | (0.011-0.276)        |       |
| Universal                          |                    | 14      | 584/1788     | 0.346 (0.266; 0.431) | 90.1%        | (0.048-0.909)        |       |
| Symptom based                      |                    | 42      | 12940/137204 | 0.241 (0.193; 0.291) | 99.2%        | (0.000-0.818)        |       |
| Not known                          |                    |         |              |                      |              |                      |       |

|           |                    |    |              |                      |       |               |
|-----------|--------------------|----|--------------|----------------------|-------|---------------|
|           | Confirmed Covid-19 | 83 | 10190/127509 | 0.181 (0.155; 0.208) | 96.0% | (0.000-0.909) |
|           | Admitted           | 57 | 998/5480     | 0.194 (0.144; 0.248) | 95.2% | (0.000-0.909) |
|           | All                | 18 | 12809/136054 | 0.205 (0.143; 0.275) | 99.6% | (0.071-0.556) |
|           | Selected           | 21 | 346/2303     | 0.181 (0.129; 0.240) | 88.2% | (0.000-0.682) |
|           | Any risk           | 93 | 14129/143772 | 0.187 (0.158; 0.218) | 98.4% | (0.000-0.909) |
|           | High risk          | 1  | 10/15        | 0.667 (0.384; 0.882) | NE    | (0.667-0.667) |
|           | HIC                | 36 | 9003/117584  | 0.173 (0.131; 0.219) | 96.3% | (0.020-0.556) |
|           | LMIC               | 55 | 4827/24053   | 0.214 (0.168; 0.264) | 97.9% | (0.000-0.909) |
| Myalgia   | All studies        | 56 | 19337/132490 | 0.168 (0.121; 0.220) | 99.3% | (0.000-0.667) |
|           | Risk based NHCC    | 7  | 13/184       | 0.058 (0.023; 0.103) | 5.8%  | (0.000-0.152) |
|           | Universal          | 16 | 518/3099     | 0.127 (0.083; 0.177) | 91.6% | (0.014-0.368) |
|           | Symptom based      | 8  | 260/1518     | 0.191 (0.130; 0.260) | 79.1% | (0.048-0.385) |
|           | Not known          | 25 | 18546/127689 | 0.230 (0.145; 0.327) | 99.7% | (0.007-0.667) |
|           | Confirmed Covid-19 | 48 | 13750/119478 | 0.146 (0.122; 0.172) | 91.9% | (0.000-0.667) |
|           | Admitted           | 33 | 463/2856     | 0.160 (0.123; 0.200) | 84.3% | (0.000-0.542) |
|           | All                | 11 | 18713/127721 | 0.270 (0.140; 0.423) | 99.9% | (0.082-0.667) |
|           | Selected           | 12 | 161/1913     | 0.100 (0.050; 0.162) | 90.9% | (0.000-0.350) |
|           | Any risk           | 55 | 19330/132470 | 0.165 (0.119; 0.217) | 99.3% | (0.000-0.667) |
|           | High risk          | NA | NA           | NA                   | NA    | NA            |
|           | HIC                | 23 | 13175/116102 | 0.124 (0.092; 0.159) | 92.7% | (0.007-0.667) |
|           | LMIC               | 27 | 5720/13301   | 0.215 (0.143; 0.297) | 96.1% | (0.000-0.667) |
| Ageusia   | All studies        | 21 | 336/3553     | 0.085 (0.059; 0.115) | 79.7% | (0.000-0.500) |
|           | Risk based NHCC    | NA | NA           | NA                   | NA    | NA            |
|           | Universal          | 9  | 229/2478     | 0.072 (0.039; 0.112) | 85.4% | (0.000-0.300) |
|           | Symptom based      | 5  | 24/186       | 0.115 (0.028; 0.242) | 78.2% | (0.030-0.283) |
|           | Not known          | 7  | 83/889       | 0.097 (0.044; 0.165) | 74.7% | (0.000-0.500) |
|           | Confirmed Covid-19 | 19 | 270/2842     | 0.089 (0.058; 0.126) | 81.6% | (0.000-0.500) |
|           | Admitted           | 13 | 193/2224     | 0.057 (0.030; 0.092) | 80.2% | (0.000-0.455) |
|           | All                | 5  | 131/1273     | 0.139 (0.082; 0.206) | 79.5% | (0.086-0.300) |
|           | Selected           | 3  | 27/82        | 0.253 (0.022; 0.597) | 89.7% | (0.048-0.553) |
|           | Any risk           | 21 | 83/776       | 0.143 (0.065; 0.243) | 89.6% | (0.025-0.553) |
|           | High risk          | NA | NA           | NA                   | NA    | NA            |
|           | HIC                | 12 | 260/2608     | 0.105 (0.068; 0.148) | 81.9% | (0.020-0.500) |
|           | LMIC               | 8  | 76/875       | 0.077 (0.039; 0.125) | 64.0% | (0.000-0.455) |
| Diarrhoea | All studies        | 66 | 6894/138900  | 0.051 (0.040; 0.064) | 94.2% | (0.000-0.333) |
|           | Risk based NHCC    | 9  | 20/317       | 0.064 (0.021; 0.122) | 58.3% | (0.000-0.182) |
|           | Universal          | 20 | 91/2334      | 0.033 (0.019; 0.050) | 65.1% | (0.000-0.140) |
|           | Symptom based      | 11 | 112/1454     | 0.076 (0.043; 0.115) | 74.5% | (0.030-0.294) |
|           | Not known          | 26 | 6671/134795  | 0.058 (0.040; 0.079) | 97.5% | (0.011-0.333) |

|                            |                    |             |             |                      |                      |               |
|----------------------------|--------------------|-------------|-------------|----------------------|----------------------|---------------|
|                            | Confirmed Covid-19 | 56          | 5253/123652 | 0.045 (0.037; 0.053) | 67.4%                | (0.000-0.333) |
|                            | Admitted           | 40          | 184/3552    | 0.050 (0.035; 0.067) | 69.4%                | (0.000-0.294) |
|                            | All                | 12          | 6658/134165 | 0.067 (0.043; 0.096) | 98.9%                | (0.032-0.333) |
|                            | Selected           | 14          | 52/1183     | 0.039 (0.019; 0.064) | 54.0%                | (0.000-0.250) |
|                            | Any risk           | 66          | 6894/138900 | 0.051 (0.040; 0.064) | 94.2%                | (0.000-0.333) |
|                            | High risk          | NA          | NA          | NA                   | NA                   | NA            |
|                            | HIC                | 26          | 4957/116200 | 0.047 (0.035; 0.060) | 68.7%                | (0.011-0.333) |
|                            | LMIC               | 37          | 1913/22132  | 0.056 (0.038; 0.077) | 93.2%                | (0.000-0.294) |
| <b>Laboratory findings</b> |                    |             |             |                      |                      |               |
| Raised white cell count    | All studies        | 29          | 560/2190    | 0.283 (0.200; 0.374) | 94.4%                | (0.000-0.732) |
|                            | Risk based NHCC    | 6           | 44/264      | 0.215 (0.069; 0.407) | 90.1%                | (0.026-0.519) |
|                            | Universal          | 5           | 112/331     | 0.266 (0.049; 0.566) | 96.5%                | (0.071-0.656) |
|                            | Symptom based      | 5           | 79/214      | 0.300 (0.113; 0.527) | 90.6%                | (0.048-0.652) |
|                            | Not known          | 13          | 325//1381   | 0.318 (0.196; 0.454) | 95.1%                | (0.000-0.732) |
|                            | Confirmed Covid-19 | 24          | 474/1810    | 0.302 (0.210; 0.404) | 94.3%                | (0.048-0.732) |
|                            | Admitted           | 20          | 366/1079    | 0.303 (0.206; 0.410) | 92.0%                | (0.048-0.732) |
|                            | All                | 3           | 74/664      | 0.112 (0.000; 0.360) | 95.6%                | (0.000-0.312) |
|                            | Selected           | 6           | 120/447     | 0.310 (0.122; 0.536) | 93.8%                | (0.026-0.600) |
|                            | Any risk           | 29          | 560/2190    | 0.283 (0.200; 0.374) | 94.4%                | (0.000-0.732) |
|                            | High risk          | NA          | NA          | NA                   | NA                   | NA            |
|                            | HIC                | 4           | 27/183      | 0.148 (0.062; 0.259) | 63.6%                | (0.048-0.312) |
|                            | LMIC               | 13          | 533/2007    | 0.306 (0.211; 0.409) | 95.0%                | (0.000-0.732) |
|                            | Lymphopaenia       | All studies | 57          | 2160/6225            | 0.325 (0.268; 0.385) | 95.2%         |
| Risk based NHCC            |                    | 9           | 111/311     | 0.347 (0.242; 0.460) | 70.9%                | (0.176-0.900) |
| Universal                  |                    | 14          | 412/1697    | 0.277 (0.150; 0.424) | 97.2%                | (0.022-0.872) |
| Symptom based              |                    | 12          | 636/1484    | 0.379 (0.274; 0.490) | 91.2%                | (0.062-0.697) |
| Not known                  |                    | 22          | 1001/2733   | 0.323 (0.241; 0.411) | 94.7%                | (0.000-0.833) |
| Confirmed Covid-19         |                    | 46          | 1924/5664   | 0.315 (0.253; 0.381) | 95.8%                | (0.000-0.872) |
| Admitted                   |                    | 37          | 1011/3231   | 0.330 (0.248; 0.418) | 95.8%                | (0.022-0.872) |
| All                        |                    | 5           | 702/1634    | 0.411 (0.268; 0.562) | 95.7%                | (0.000-0.712) |
| Selected                   |                    | 15          | 447/1360    | 0.290 (0.205; 0.382) | 89.8%                | (0.000-0.900) |
| Any risk                   |                    | 55          | 2146/6174   | 0.327 (0.269; 0.388) | 95.4%                | (0.000-0.900) |
| High risk                  |                    | 1           | 9/31        | 0.290 (0.142; 0.480) | NA                   | (0.290-0.290) |
| HIC                        |                    | 20          | 553/1967    | 0.271 (0.210; 0.337) | 87.8%                | (0.049-0.500) |
| LMIC                       |                    | 35          | 1031/2983   | 0.349 (0.246; 0.447) | 96.3%                | (0.000-0.900) |
| Thrombocytopenia           |                    | All studies | 36          | 362/5014             | 0.081 (0.053; 0.113) | 90.5%         |
|                            | Risk based NHCC    | 6           | 33/250      | 0.097 (0.024; 0.103) | 77.1%                | (0.000-0.353) |
|                            | Universal          | 10          | 68/2029     | 0.070 (0.028; 0.127) | 90.0%                | (0.009-0.130) |
|                            | Symptom based      | 5           | 88/1210     | 0.065 (0.005; 0.173) | 94.1%                | (0.000-0.397) |

|                              |                             |    |           |                      |       |               |
|------------------------------|-----------------------------|----|-----------|----------------------|-------|---------------|
|                              | Not known                   | 15 | 173/1525  | 0.089 (0.053; 0.132) | 80.2% | (0.000-0.267) |
|                              | Confirmed Covid-19 Admitted | 31 | 331/4740  | 0.079 (0.050; 0.114) | 91.3% | (0.000-0.397) |
|                              | All                         | 26 | 188/3184  | 0.069 (0.035; 0.110) | 91.4% | (0.000-0.397) |
|                              | Selected                    | 2  | 61/910    | 0.058 (0.043; 0.076) | NA    | (0.065-0.130) |
|                              | Any risk                    | 8  | 113/920   | 0.120 (0.087; 0.158) | 40.5% | (0.036-0.267) |
|                              | High risk                   | 36 | 362/5014  | 0.081 (0.053; 0.113) | 90.5% | (0.000-0.397) |
|                              | HIC                         | NA | NA        | NA                   | NA    | NA            |
|                              | LMIC                        | 12 | 84/2383   | 0.047 (0.017; 0.090) | 89.8% | (0.000-0.130) |
| Abnormal liver function test | All studies                 | 22 | 180/1356  | 0.106 (0.064; 0.155) | 82.9% | (0.000-0.397) |
|                              | Risk based NHCC             | 33 | 386/3059  | 0.129 (0.089; 0.174) | 89.5% | (0.000-0.441) |
|                              | Universal                   | 6  | 19/154    | 0.108 (0.031; 0.214) | 66.3% | (0.000-0.294) |
|                              | Symptom based               | 9  | 79/1119   | 0.061 (0.047; 0.078) | 0.8%  | (0.036-0.143) |
|                              | Not known                   | 5  | 52/215    | 0.189 (0.075; 0.336) | 81.4% | (0.062-0.441) |
|                              | Confirmed Covid-19 Admitted | 13 | 236/1571  | 0.172 (0.089; 0.272) | 94.3% | (0.000-0.386) |
|                              | All                         | 30 | 366/2948  | 0.124 (0.082; 0.171) | 90.2% | (0.000-0.447) |
|                              | Selected                    | 26 | 284/2013  | 0.129 (0.088; 0.177) | 85.2% | (0.000-0.441) |
|                              | Any risk                    | 2  | 69/658    | 0.084 (0.064; 0.107) | NA    | (0.000-0.360) |
|                              | High risk                   | 2  | 33/388    | 0.106 (0.004; 0.287) | 90.0% | (0.000-0.386) |
|                              | HIC                         | 33 | 386/3059  | 0.129 (0.089; 0.174) | 89.5% | (0.000-0.441) |
|                              | LMIC                        | NA | NA        | NA                   | NA    | NA            |
| Raised procalcitonin         | All studies                 | 11 | 95/1295   | 0.068 (0.045; 0.095) | 47.6% | (0.042-0.204) |
|                              | Risk based NHCC             | 22 | 291/1764  | 0.159 (0.097; 0.231) | 91.4% | (0.000-0.441) |
|                              | Universal                   | 8  | 142/494   | 0.316 (0.089; 0.599) | 97.2% | (0.000-1.000) |
|                              | Symptom based               | 4  | 33/103    | 0.221 (0.000; 0.802) | 97.4% | (0.000-0.968) |
|                              | Not known                   | 4  | 109/391   | 0.407 (0.103; 0.757) | 97.9% | (0.061-1.000) |
|                              | Confirmed Covid-19 Admitted | NA | NA        | NA                   | NA    | NA            |
|                              | All                         | 7  | 140/467   | 0.357 (0.098; 0.668) | 97.6% | (0.000-1.000) |
|                              | Selected                    | 6  | 111/436   | 0.240 (0.055; 0.495) | 96.3% | (0.000-0.968) |
|                              | Any risk                    | NA | NA        | NA                   | NA    | NA            |
|                              | High risk                   | 2  | 31/58     | 0.592 (0.460; 0.717) | NA    | (0.036-1.000) |
|                              | HIC                         | 7  | 112/464   | 0.204 (0.046; 0.429) | 95.8% | (0.000-0.968) |
|                              | LMIC                        | NA | NA        | NA                   | NA    | NA            |
| Raised C-reactive protein    | All studies                 | 2  | 57/188    | 0.314 (0.248; 0.383) | NA    | (0.171-1.000) |
|                              | Risk based NHCC             | 6  | 85/306    | 0.210 (0.016; 0.518) | 96.4% | (0.000-0.968) |
|                              | Universal                   | 29 | 1076/2698 | 0.507 (0.380; 0.634) | 97.5% | (0.041-1.000) |
|                              | Symptom based               | 4  | 103/205   | 0.538 (0.415; 0.659) | 60.1% | (0.440-0.704) |
|                              | All                         | 6  | 293/1068  | 0.448 (0.208; 0.702) | 98.2% | (0.041-1.000) |
|                              | Selected                    | 8  | 235/349   | 0.635 (0.427; 0.820) | 93.0% | (0.250-0.964) |

|                              |                             |             |           |                      |                      |               |               |
|------------------------------|-----------------------------|-------------|-----------|----------------------|----------------------|---------------|---------------|
|                              | Not known                   | 11          | 445/1067  | 0.432 (0.219; 0.659) | 98.0%                | (0.057-0.818) |               |
|                              | Confirmed Covid-19 Admitted | 23          | 957/2416  | 0.523 (0.372; 0.672) | 98.0%                | (0.041-1.000) |               |
|                              | All                         | 22          | 834/2065  | 0.483 (0.341; 0.627) | 97.4%                | (0.041-0.964) |               |
|                              | Selected                    | 1           | 80/125    | 0.640 (0.549; 0.724) | NA                   | (0.640-0.640) |               |
|                              | Any risk                    | 6           | 162/499   | 0.573 (0.220; 0.889) | 98.2%                | (0.041-1.000) |               |
|                              | High risk                   | 28          | 1046/2659 | 0.482 (0.358; 0.608) | 97.4%                | (0.041-0.964) |               |
|                              | HIC                         | NA          | NA        | NA                   | NA                   | NA            |               |
|                              | LMIC                        | 6           | 268/764   | 0.462 (0.264; 0.667) | 94.9%                | (0.233-1.000) |               |
|                              |                             | 23          | 808/1925  | 0.519 (0.359; 0.677) | 97.8%                | (0.041-0.964) |               |
| <b>Radiological findings</b> |                             |             |           |                      |                      |               |               |
| Ground glass appearance      | All studies                 | 22          | 409/784   | 0.597 (0.422; 0.761) | 95.6%                | (0.065-1.000) |               |
|                              | Risk based NHCC             | 10          | 260/367   | 0.736 (0.514; 0.912) | 94.4%                | (0.152-1.000) |               |
|                              | Universal                   | NA          | NA        | NA                   | NA                   | NA            |               |
|                              | Symptom based               | 3           | 44/132    | 0.497 (0.030; 0.968) | 97.7%                | (0.093-1.000) |               |
|                              | Not known                   | 9           | 105/285   | 0.462 (0.238; 0.694) | 92.9%                | (0.065-1.000) |               |
|                              | Confirmed Covid-19 Admitted | 14          | 213/444   | 0.611 (0.405; 0.799) | 94.3%                | (0.125-1.000) |               |
|                              | All                         | 7           | 195/410   | 0.571 (0.337; 0.791) | 95.4%                | (0.065-1.000) |               |
|                              | Selected                    | 1           | 18/85     | 0.212 (0.131; 0.314) | NA                   | (0.212-0.212) |               |
|                              | Any risk                    | 5           | 185/245   | 0.754 (0.484; 0.951) | 93.5%                | (0.152-1.000) |               |
|                              | High risk                   | 14          | 403/769   | 0.606 (0.425; 0.774) | 95.8%                | (0.065-1.000) |               |
|                              | HIC                         | 1           | 6/15      | 0.400 (0.163; 0.677) | NA                   | (0.400-0.400) |               |
|                              | LMIC                        | 2           | 28/77     | 0.379 (0.272; 0.492) | NA                   | (0.093-1.000) |               |
|                              |                             |             | 20        | 381/707              | 0.596 (0.421; 0.760) | 95.1%         | (0.065-1.000) |
|                              | CT-chest abnormality        | All studies | 39        | 1000/3686            | 0.609 (0.481; 0.731) | 98.1%         | (0.033-1.000) |
| Risk based NHCC              |                             | 14          | 356/466   | 0.790 (0.646; 0.906) | 90.8%                | (0.250-1.000) |               |
| Universal                    |                             | 4           | 69/104    | 0.692 (0.399; 0.923) | 88.6%                | (0.300-0.905) |               |
| Symptom based                |                             | 8           | 332/2160  | 0.363 (0.182; 0.566) | 98.6%                | (0.061-1.000) |               |
| Not known                    |                             | 13          | 243/956   | 0.531 (0.299; 0.756) | 97.2%                | (0.033-1.000) |               |
| Confirmed Covid-19 Admitted  |                             | 27          | 649/2635  | 0.572 (0.426; 0.712) | 97.8%                | (0.034-1.000) |               |
| All                          |                             | 26          | 570/1236  | 0.648 (0.496; 0.787) | 95.9%                | (0.033-1.000) |               |
| Selected                     |                             | 3           | 144/2037  | 0.071 (0.058; 0.085) | 26.6%                | (0.061-0.083) |               |
| Any risk                     |                             | 9           | 275/369   | 0.752 (0.568; 0.901) | 92.2%                | (0.300-1.000) |               |
| High risk                    |                             | 38          | 991/3656  | 0.618 (0.487; 0.740) | 98.1%                | (0.033-1.000) |               |
| HIC                          |                             | NA          | NA        | NA                   | NA                   | NA            |               |
| LMIC                         |                             | 6           | 194/1179  | 0.265 (0.145; 0.406) | 94.0%                | (0.083-0.706) |               |
|                              |                             |             | 29        | 656/1439             | 0.705 (0.522; 0.861) | 97.7%         | (0.033-1.000) |

*N\** – Number of pregnant or recently pregnant women for whom manifestations were reported; *CI* – Confidence Interval; *CT* – Computerised tomography; *NHCC* National Health Commission China; *NA*- Not available; *HIC* – High Income Countries; *LMIC* – Low and Middle Income Countries

*Risk based NHCC, Universal and Symptom based, Not Known=Sampling frames for detecting COVID-19; Confirmed COVID-19=Analysis restricted to women with laboratory confirmation of COVID-19 only; Admitted, All, Selected = Population types of women in studies; Any risk, High risk = Pregnancy risk status*





**Appendix 8. Prevalence of coronavirus disease (COVID-19) and pregnancy related outcomes in pregnant or recently pregnant women with suspected or confirmed disease**

| Outcomes                         | Subgroup                         | Studies     | Events/N(*) | Proportion (95% CI)   | I-squared            | Range         |
|----------------------------------|----------------------------------|-------------|-------------|-----------------------|----------------------|---------------|
| <b>Covid-19 related outcomes</b> |                                  |             |             |                       |                      |               |
| All-cause mortality              | All studies                      | 123         | 970/179981  | 0.0015 (0.000; 0.004) | 93.6%                | (0.000-0.222) |
|                                  | Risk based NHCC                  | 14          | 2/591       | 0.000 (0.000; 0.004)  | 0.0%                 | (0.000-0.019) |
|                                  | Universal                        | 41          | 47/19822    | 0.000 (0.000; 0.000)  | 11.5%                | (0.000-0.042) |
|                                  | Symptom based                    | 19          | 86/6559     | 0.004 (0.000; 0.010)  | 65.2%                | (0.000-0.053) |
|                                  | Not known                        | 49          | 835/153009  | 0.006 (0.001; 0.012)  | 97.2%                | (0.000-0.222) |
|                                  | Confirmed Covid-19               | 107         | 871/167499  | 0.002 (0.0003; 0.005) | 94.6%                | (0.000-0.222) |
|                                  | Admitted                         | 74          | 98/20197    | 0.001 (0.000; 0.002)  | 56.7%                | (0.000-0.222) |
|                                  | All                              | 22          | 480/151731  | 0.003 (0.000; 0.006)  | 96.9%                | (0.000-0.027) |
|                                  | Selected                         | 26          | 392/8009    | 0.003 (0.000; 0.016)  | 91.8%                | (0.000-0.133) |
|                                  | High risk                        | 1           | 2/15        | 0.133 (0.017; 0.405)  | NE                   | (0.133-0.133) |
|                                  | Any risk                         | 121         | 968/179928  | 0.002 (0.000; 0.004)  | 93.7%                | (0.000-0.222) |
|                                  | HIC                              | 49          | 166/137273  | 0.000 (0.000; 0.000)  | 35.1%                | (0.000-0.048) |
|                                  | LMIC                             | 67          | 763/31136   | 0.007 (0.002; 0.013)  | 87.5%                | (0.000-0.222) |
|                                  | Admission to intensive care unit | All studies | 119         | 3072/176686           | 0.039 (0.030; 0.049) | 97.3%         |
| Risk based NHCC                  |                                  | 7           | 9/294       | 0.012 (0.000; 0.038)  | 31.3%                | (0.000-0.069) |
| Universal                        |                                  | 42          | 791/21866   | 0.023 (0.017; 0.030)  | 73.3%                | (0.000-0.127) |
| Symptom based                    |                                  | 18          | 467/6523    | 0.058 (0.036; 0.084)  | 89.1%                | (0.000-0.400) |
| Not known                        |                                  | 52          | 1805/148003 | 0.049 (0.034; 0.065)  | 98.1%                | (0.000-0.417) |
| Confirmed Covid-19               |                                  | 109         | 2373/162529 | 0.036 (0.028; 0.045)  | 96.3%                | (0.000-0.417) |
| Admitted                         |                                  | 73          | 842/22168   | 0.033 (0.026; 0.040)  | 73.8%                | (0.000-0.375) |
| All                              |                                  | 27          | 2017/151691 | 0.038 (0.022; 0.058)  | 99.1%                | (0.000-0.400) |
| Selected                         |                                  | 19          | 213/2827    | 0.051 (0.030; 0.076)  | 79.0%                | (0.000-0.417) |
| High risk                        |                                  | NA          | NA          | NA                    | NA                   | NA            |
| Any risk                         |                                  | 117         | 3071/176618 | 0.039 (0.031; 0.049)  | 97.4%                | (0.000-0.417) |
| HIC                              |                                  | 58          | 1434/141694 | 0.032 (0.023; 0.043)  | 95.9%                | (0.000-0.417) |
| LMIC                             |                                  | 54          | 1141/23420  | 0.045 (0.026; 0.069)  | 97.1%                | (0.000-0.400) |
| Severe COVID-19                  |                                  | All studies | 82          | 1741/31331            | 0.088 (0.069; 0.109) | 95.6%         |
|                                  | Risk based NHCC                  | 10          | 39/450      | 0.063 (0.023; 0.117)  | 69.8%                | (0.000-0.323) |
|                                  | Universal                        | 34          | 630/14026   | 0.052 (0.033; 0.076)  | 93.0%                | (0.000-0.311) |
|                                  | Symptom based                    | 8           | 370/2272    | 0.162 (0.128; 0.199)  | 70.1%                | (0.073-0.348) |
|                                  | Not known                        | 30          | 702/14583   | 0.126 (0.076; 0.184)  | 96.9%                | (0.000-1.000) |
|                                  | Confirmed Covid-19               | 74          | 1262/18837  | 0.093 (0.069; 0.118)  | 95.2%                | (0.000-1.000) |
|                                  | Admitted                         | 47          | 539/6628    | 0.071 (0.047; 0.099)  | 91.7%                | (0.000-0.414) |

|                             |                             |     |             |                      |                      |               |
|-----------------------------|-----------------------------|-----|-------------|----------------------|----------------------|---------------|
| Invasive ventilation        | All                         | 13  | 896/22879   | 0.074 (0.048; 0.105) | 97.1%                | (0.013-0.207) |
|                             | Selected                    | 22  | 306/1824    | 0.134 (0.059; 0.230) | 95.9%                | (0.000-1.000) |
|                             | High risk                   | 3   | 142/599     | 0.465 (0.009; 0.971) | 99.3%                | (0.110-1.000) |
|                             | Any risk                    | 78  | 1596/30702  | 0.077 (0.061; 0.095) | 94.3%                | (0.000-0.672) |
|                             | HIC                         | 45  | 800/6810    | 0.122 (0.083; 0.166) | 95.4%                | (0.000-1.000) |
|                             | LMIC                        | 32  | 535/14784   | 0.050 (0.030; 0.073) | 90.4%                | (0.000-0.323) |
|                             | All studies                 | 72  | 1088/168378 | 0.018 (0.012; 0.025) | 96.8%                | (0.000-0.867) |
|                             | Risk based NHCC             | 4   | 2/193       | 0.004 (0.000; 0.024) | 0.0%                 | (0.000-0.017) |
|                             | Universal                   | 26  | 159/17410   | 0.007 (0.003; 0.013) | 71.3%                | (0.000-0.077) |
|                             | Symptom based               | 13  | 256/6283    | 0.025 (0.014; 0.039) | 75.9%                | (0.000-0.071) |
|                             | Not known                   | 29  | 671/144492  | 0.024 (0.013; 0.037) | 98.0%                | (0.000-0.867) |
|                             | Confirmed Covid-19 Admitted | 69  | 711/154698  | 0.016 (0.011; 0.023) | 94.9%                | (0.000-0.867) |
|                             | All                         | 44  | 256/17128   | 0.013 (0.008; 0.020) | 73.0%                | (0.000-0.114) |
|                             | Need for ECMO               | All | 20          | 755/149841           | 0.014 (0.006; 0.026) | 98.8%         |
| Selected                    |                             | 8   | 77/1409     | 0.078 (0.027; 0.147) | 91.9%                | (0.017-0.867) |
| High risk                   |                             | 1   | 13/15       | 0.867 (0.595; 0.983) | NE                   | (0.867-0.867) |
| Any risk                    |                             | 71  | 1075/168363 | 0.016 (0.010; 0.023) | 96.7%                | (0.000-0.250) |
| HIC                         |                             | 36  | 434/137490  | 0.015 (0.008; 0.022) | 94.8%                | (0.000-0.250) |
| LMIC                        |                             | 32  | 552/21113   | 0.022 (0.008; 0.040) | 96.0%                | (0.000-0.867) |
| All studies                 |                             | 24  | 47/35238    | 0.002 (0.000; 0.006) | 72.8%                | (0.000-0.091) |
| Risk based NHCC             |                             | 3   | 1/181       | 0.002 (0.000; 0.021) | 0.0%                 | (0.000-0.009) |
| Universal                   |                             | 6   | 5/404       | 0.007 (0.000; 0.021) | 0.0%                 | (0.000-0.016) |
| Symptom based               |                             | 3   | 8/824       | 0.005 (0.000; 0.034) | 74.4%                | (0.000-0.091) |
| Not known                   |                             | 12  | 33/33829    | 0.001 (0.000; 0.005) | 73.3%                | (0.000-0.030) |
| Confirmed Covid-19 Admitted |                             | 21  | 40/34446    | 0.001 (0.000; 0.005) | 70.8%                | (0.000-0.091) |
| All                         |                             | 13  | 12/2773     | 0.000 (0.000; 0.002) | 0.0%                 | (0.000-0.016) |
| Oxygen through cannula only |                             | All | 4           | 30/31345             | 0.009 (0.000; 0.030) | 92.0%         |
|                             | Selected                    | 7   | 5/1120      | 0.001 (0.000; 0.009) | 46.3%                | (0.000-0.091) |
|                             | High risk                   | 3   | 3/735       | 0.001 (0.000; 0.007) | 0.0%                 | (0.000-0.014) |
|                             | Any risk                    | 21  | 434/34503   | 0.002 (0.000; 0.006) | 74.4%                | (0.000-0.091) |
|                             | HIC                         | 19  | 34/34481    | 0.002 (0.000; 0.007) | 76.6%                | (0.000-0.091) |
|                             | LMIC                        | 4   | 1/369       | 0.000 (0.000; 0.007) | 0.0%                 | (0.000-0.009) |
|                             | All studies                 | 33  | 365/6069    | 0.129 (0.081; 0.186) | 96.3%                | (0.000-1.000) |
|                             | Risk based NHCC             | 4   | 64/108      | 0.619 (0.106; 0.998) | 97.0%                | (0.065-1.000) |
|                             | Universal                   | 13  | 57/948      | 0.056 (0.022; 0.102) | 82.0%                | (0.000-0.375) |
|                             | Symptom based               | 6   | 99/833      | 0.083 (0.028; 0.158) | 78.2%                | (0.000-0.263) |
|                             | Not known                   | 10  | 136/4180    | 0.126 (0.058; 0.214) | 97.3%                | (0.009-0.812) |
|                             | Confirmed Covid-19          | 30  | 244/5332    | 0.110 (0.067; 0.161) | 95.2%                | (0.000-0.879) |

|                                        |                    |           |            |                      |                      |               |               |
|----------------------------------------|--------------------|-----------|------------|----------------------|----------------------|---------------|---------------|
| Acute respiratory distress syndrome    | Admitted           | 20        | 107/1173   | 0.108 (0.047; 0.186) | 92.1%                | (0.000-1.000) |               |
|                                        | All                | 4         | 132/4301   | 0.035 (0.005; 0.089) | 98.1%                | (0.009-0.135) |               |
|                                        | Selected           | 9         | 117/595    | 0.275 (0.063; 0.556) | 97.4%                | (0.000-0.879) |               |
|                                        | High risk          | 1         | 52/64      | 0.812 (0.695; 0.899) | NE                   | (0.812-0.812) |               |
|                                        | Any risk           | 32        | 304/6005   | 0.110 (0.070; 0.158) | 95.2%                | (0.000-1.000) |               |
|                                        | HIC                | 23        | 246/5055   | 0.088 (0.046; 0.139) | 94.4%                | (0.000-0.812) |               |
|                                        | LMIC               | 9         | 102/774    | 0.291 (0.065; 0.589) | 95.5%                | (0.000-1.000) |               |
|                                        | All studies        | 35        | 432/4345   | 0.087 (0.041; 0.146) | 96.7%                | (0.000-0.574) |               |
|                                        | Risk based NHCC    | 1         | 0/17       | 0.000 (0.000; 0.195) | NE                   | (0.000-0.000) |               |
|                                        | Universal          | 7         | 21/680     | 0.023 (0.007; 0.046) | 35.8%                | (0.000-0.133) |               |
|                                        | Symptom based      | 6         | 23/323     | 0.071 (0.011; 0.168) | 84.6%                | (0.000-0.400) |               |
|                                        | Not known          | 21        | 388/3325   | 0.118 (0.044; 0.216) | 97.9%                | (0.000-0.574) |               |
|                                        | Confirmed Covid-19 | 30        | 164/3704   | 0.067 (0.037; 0.104) | 91.4%                | (0.000-0.574) |               |
|                                        | Admitted           | 25        | 311/3544   | 0.041 (0.006; 0.096) | 97.0%                | (0.000-0.508) |               |
|                                        | Pneumonia          | All       | 2          | 16/125               | 0.104 (0.054; 0.167) | NE            | (0.060-0.400) |
|                                        |                    | Selected  | 8          | 105/676              | 0.273 (0.093; 0.500) | 96.3%         | (0.018-0.574) |
| High risk                              |                    | 4         | 51/799     | 0.154 (0.027; 0.351) | 95.7%                | (0.025-0.500) |               |
| Any risk                               |                    | 31        | 381/3546   | 0.079 (0.030; 0.145) | 96.9%                | (0.000-0.574) |               |
| HIC                                    |                    | 19        | 132/1893   | 0.091 (0.047; 0.145) | 90.7%                | (0.014-0.574) |               |
| LMIC                                   |                    | 13        | 289/1714   | 0.110 (0.004; 0.298) | 98.4%                | (0.000-0.508) |               |
| All studies                            |                    | 70        | 1257/7198  | 0.353 (0.265; 0.446) | 97.9%                | (0.000-1.000) |               |
| Risk based NHCC                        |                    | 12        | 305/436    | 0.809 (0.567; 0.971) | 96.5%                | (0.000-1.000) |               |
| Universal                              |                    | 24        | 1127/18945 | 0.070 (0.034; 0.116) | 98.7%                | (0.001-0.300) |               |
| Symptom based                          |                    | 11        | 580/4617   | 0.233 (0.131; 0.354) | 97.1%                | (0.043-1.000) |               |
| Not known                              |                    | 23        | 640/11028  | 0.107 (0.066; 0.156) | 97.4%                | (0.000-0.500) |               |
| Confirmed Covid-19                     |                    | 60        | 2363/34575 | 0.12 (0.091; 0.153)  | 98.3%                | (0.000-1.000) |               |
| Admitted                               |                    | 44        | 1684/13163 | 0.149 (0.114; 0.186) | 95.7%                | (0.000-1.000) |               |
| All                                    |                    | 12        | 688/21001  | 0.101 (0.054; 0.160) | 99.2%                | (0.001-1.000) |               |
| Acute cardiac, renal or hepatic injury |                    | Selected  | 13         | 236/818              | 0.449 (0.218; 0.691) | 97.7%         | (0.000-1.000) |
|                                        |                    | High risk | 1          | 75/598               | 0.125 (0.100; 0.155) | NE            | (0.125-0.125) |
|                                        | Any risk           | 68        | 2568/34398 | 0.199 (0.159; 0.242) | 98.6%                | (0.000-1.000) |               |
|                                        | HIC                | 39        | 1720/21208 | 0.089 (0.063; 0.117) | 97.1%                | (0.000-0.456) |               |
|                                        | LMIC               | 29        | 920/5263   | 0.434 (0.304; 0.569) | 98.1%                | (0.000-1.000) |               |
|                                        | All studies        | 37        | 144/12405  | 0.011 (0.005; 0.018) | 69.7%                | (0.000-0.200) |               |
|                                        | Risk based NHCC    | 2         | 0/48       | 0.000 (0.000; 0.074) | NE                   | NA            |               |
|                                        | Universal          | 10        | 42/2051    | 0.016 (0.009; 0.025) | 16.2%                | (0.007-0.077) |               |
|                                        | Symptom based      | 4         | 8/1000     | 0.032 (0.000; 0.123) | 86.7%                | (0.000-0.130) |               |

|                                            |                    |                 |            |                      |                      |               |               |
|--------------------------------------------|--------------------|-----------------|------------|----------------------|----------------------|---------------|---------------|
|                                            | Not known          | 21              | 94/9306    | 0.008 (0.002; 0.017) | 68.4%                | (0.000-0.200) |               |
|                                            | Confirmed Covid-19 | 35              | 140/12370  | 0.010 (0.005; 0.017) | 68.4%                | (0.000-0.200) |               |
|                                            | Admitted           | 26              | 118/9691   | 0.013 (0.006; 0.022) | 65.4%                | (0.000-0.188) |               |
|                                            | All                | 5               | 6/1719     | 0.002 (0.000; 0.008) | 38.8%                | (0.001-0.030) |               |
|                                            | Selected           | 6               | 20/995     | 0.027 (0.002; 0.067) | 79.8%                | (0.003-0.200) |               |
|                                            | High risk          | 4               | 8/799      | 0.017 (0.005; 0.058) | 77.9%                | (0.003-0.125) |               |
|                                            | Any risk           | 33              | 136/11606  | 0.011 (0.005; 0.018) | 69.5%                | (0.000-0.200) |               |
|                                            | HIC                | 20              | 118/9909   | 0.013 (0.006; 0.022) | 66.6%                | (0.000-0.130) |               |
|                                            | LMIC               | 14              | 24/1111    | 0.026 (0.000; 0.055) | 66.0%                | (0.000-0.200) |               |
| <b>Pregnancy related maternal outcomes</b> |                    |                 |            |                      |                      |               |               |
| Preterm birth <37 weeks                    | All studies        | 175             | 5824/40942 | 0.174 (0.160; 0.189) | 90.0%                | (0.000-1.000) |               |
|                                            | Risk based NHCC    | 14              | 77/446     | 0.161 (0.119; 0.206) | 25.2%                | (0.037-0.357) |               |
|                                            | Universal          | 26              | 2610/17861 | 0.136 (0.122; 0.151) | 78.5%                | (0.000-0.387) |               |
|                                            | Symptom based      | 22              | 350/1890   | 0.238 (0.151; 0.336) | 93.4%                | (0.000-1.000) |               |
|                                            | Not known          | 61              | 2787/20745 | 0.221 (0.191; 0.252) | 94.0%                | (0.000-1.000) |               |
|                                            | Confirmed Covid-19 | 158             | 5537/39642 | 0.173 (0.158; 0.188) | 90.4%                | (0.000-1.000) |               |
|                                            | Admitted           | 110             | 3039/23730 | 0.165 (0.147; 0.184) | 89.0%                | (0.000-1.000) |               |
|                                            | All                | 26              | 1551/9197  | 0.175 (0.137; 0.217) | 93.7%                | (0.000-1.000) |               |
|                                            | Selected           | 39              | 1234/8015  | 0.205 (0.171; 0.241) | 86.9%                | (0.000-0.947) |               |
|                                            | High risk          | 3               | 83/488     | 0.556 (0.030; 1.000) | 97.5%                | (0.123-0.450) |               |
|                                            | Any risk           | 168             | 5713/40343 | 0.169 (0.155; 0.184) | 89.8%                | (0.000-1.000) |               |
|                                            | HIC                | 102             | 3703/28905 | 0.149 (0.134; 0.165) | 86.7%                | (0.000-0.947) |               |
|                                            | LMIC               | 63              | 1130/6626  | 0.208 (0.174; 0.245) | 88.3%                | (0.000-1.000) |               |
|                                            | PPROM <37 weeks    | All studies     | 41         | 195/6080             | 0.040 (0.026; 0.055) | 77.6%         | (0.000-0.333) |
|                                            |                    | Risk based NHCC | 4          | 15/183               | 0.079 (0.035; 0.137) | 24.2%         | (0.037-0.172) |
|                                            |                    | Universal       | 17         | 117/4760             | 0.028 (0.014; 0.045) | 81.6%         | (0.000-0.117) |
| Symptom based                              |                    | 7               | 15/201     | 0.065 (0.018; 0.129) | 36.6%                | (0.024-0.211) |               |
| Not known                                  |                    | 13              | 48/936     | 0.044 (0.018; 0.078) | 66.1%                | (0.000-0.333) |               |
| Confirmed Covid-19                         |                    | 38              | 181/5926   | 0.036 (0.022; 0.051) | 76.9%                | (0.000-0.333) |               |
| Admitted                                   |                    | 26              | 139/4400   | 0.037 (0.021; 0.056) | 77.4%                | (0.000-0.333) |               |
| All                                        |                    | 7               | 25/1059    | 0.046 (0.006; 0.111) | 84.1%                | (0.007-0.172) |               |
| Selected                                   |                    | 8               | 31/621     | 0.052 (0.019; 0.096) | 66.7%                | (0.031-0.167) |               |
| High risk                                  |                    | 2               | 4/51       | 0.068 (0.009; 0.160) | NE                   | (0.031-0.158) |               |
| Any risk                                   |                    | 39              | 191/6029   | 0.038 (0.025; 0.054) | 78.1%                | (0.000-0.333) |               |
| HIC                                        |                    | 31              | 148/4890   | 0.033 (0.020; 0.049) | 72.6%                | (0.000-0.211) |               |
| LMIC                                       |                    | 9               | 42/459     | 0.079 (0.045; 0.119) | 30.4%                | (0.000-0.333) |               |
| Spontaneous preterm birth                  |                    | All studies     | 40         | 535/8009             | 0.066 (0.051; 0.082) | 79.3%         | (0.000-0.321) |
|                                            |                    | Risk based NHCC | 3          | 8/153                | 0.049 (0.017; 0.092) | 0.0%          | (0.036-0.061) |

|                             |                             |           |             |                      |                      |               |               |
|-----------------------------|-----------------------------|-----------|-------------|----------------------|----------------------|---------------|---------------|
| Caesarean section           | Universal                   | 19        | 284/4607    | 0.061 (0.044; 0.082) | 75.1%                | (0.000-0.312) |               |
|                             | Symptom based               | 4         | 24/174      | 0.113 (0.020; 0.258) | 82.7%                | (0.018-0.228) |               |
|                             | Not known                   | 14        | 219/3075    | 0.066 (0.039; 0.098) | 85.3%                | (0.000-0.292) |               |
|                             | Confirmed Covid-19 Admitted | 37        | 501/7190    | 0.068 (0.052; 0.086) | 80.2%                | (0.000-0.312) |               |
|                             | All                         | 22        | 335/4928    | 0.085 (0.061; 0.112) | 84.4%                | (0.000-0.312) |               |
|                             | Selected                    | 6         | 127/1561    | 0.041 (0.019; 0.070) | 78.8%                | (0.000-0.091) |               |
|                             | High risk                   | 12        | 73/1520     | 0.049 (0.028; 0.073) | 51.0%                | (0.000-0.222) |               |
|                             | Any risk                    | 2         | 5/51        | 0.092 (0.022; 0.194) | NE                   | (0.062-0.158) |               |
|                             | HIC                         | 36        | 525/7890    | 0.066 (0.051; 0.082) | 80.6%                | (0.000-0.312) |               |
|                             | LMIC                        | 26        | 384/5448    | 0.065 (0.048; 0.085) | 76.2%                | (0.000-0.308) |               |
|                             | All studies                 | 11        | 76/858      | 0.084 (0.035; 0.149) | 85.8%                | (0.000-0.312) |               |
|                             | Risk based NHCC             | 184       | 16242/40861 | 0.485 (0.460; 0.510) | 94.7%                | (0.000-1.000) |               |
|                             | Universal                   | 13        | 365/448     | 0.830 (0.764; 0.887) | 62.0%                | (0.650-1.000) |               |
|                             | Symptom based               | 84        | 6871/17387  | 0.396 (0.368; 0.424) | 90.3%                | (0.000-1.000) |               |
|                             | Not known                   | 20        | 1756/1367   | 0.476 (0.361; 0.591) | 93.4%                | (0.000-0.941) |               |
|                             | Confirmed Covid-19 Admitted | 67        | 8346/21270  | 0.534 (0.490; 0.578) | 96.5%                | (0.154-1.000) |               |
|                             | All                         | 169       | 15453/39559 | 0.456 (0.432; 0.481) | 94.4%                | (0.000-1.000) |               |
|                             | Vaginal delivery            | Selected  | 117         | 8813/23058           | 0.478 (0.447; 0.508) | 93.2%         | (0.000-1.000) |
|                             |                             | High risk | 28          | 4227/9602            | 0.418 (0.351; 0.486) | 97.0%         | (0.182-0.931) |
|                             |                             | Any risk  | 39          | 3202/8201            | 0.559 (0.494; 0.624) | 95.5%         | (0.210-1.000) |
| HIC                         |                             | 4         | 207/520     | 0.777 (0.373; 1.000) | 96.4%                | (0.333-1.000) |               |
| LMIC                        |                             | 175       | 15958/40203 | 0.477 (0.452; 0.503) | 94.8%                | (0.000-1.000) |               |
| All studies                 |                             | 102       | 9762/27843  | 0.363 (0.339; 0.387) | 90.6%                | (0.000-1.000) |               |
| Risk based NHCC             |                             | 74        | 4383/7812   | 0.652 (0.609; 0.695) | 91.6%                | (0.142-1.000) |               |
| Universal                   |                             | 181       | 24726/40844 | 0.514 (0.490; 0.538) | 94.2%                | (0.000-1.000) |               |
| Symptom based               |                             | 12        | 71/431      | 0.157 (0.119; 0.198) | 13.9%                | (0.000-0.233) |               |
| Not known                   |                             | 82        | 10507/17387 | 0.603 (0.575; 0.631) | 90.1%                | (0.000-1.000) |               |
| Confirmed Covid-19 Admitted |                             | 20        | 1104/1756   | 0.519 (0.400; 0.637) | 93.8%                | (0.059-1.000) |               |
| All                         |                             | 67        | 13024/21270 | 0.464 (0.423; 0.505) | 95.9%                | (0.000-0.846) |               |
| Selected                    |                             | 166       | 24194/39542 | 0.543 (0.519; 0.566) | 93.8%                | (0.000-1.000) |               |
| High risk                   |                             | 115       | 14256/23058 | 0.519 (0.489; 0.550) | 93.2%                | (0.000-1.000) |               |
| Any risk                    |                             | 28        | 5930/9602   | 0.565 (0.497; 0.632) | 96.9%                | (0.069-0.818) |               |
| HIC                         |                             | 38        | 4540/8184   | 0.459 (0.408; 0.510) | 92.1%                | (0.000-0.790) |               |
| LMIC                        |                             | 4         | 312/520     | 0.223 (0.000; 0.625) | 96.3%                | (0.000-0.665) |               |
|                             |                             | 172       | 24353/40186 | 0.521 (0.497; 0.546) | 94.3%                | (0.000-1.000) |               |
|                             |                             | 100       | 18183/27843 | 0.634 (0.611; 0.657) | 89.6%                | (0.000-1.000) |               |
|                             |                             | 73        | 3409/7795   | 0.346 (0.304; 0.389) | 91.4%                | (0.000-0.806) |               |

|                        |                           |             |           |                       |                      |               |
|------------------------|---------------------------|-------------|-----------|-----------------------|----------------------|---------------|
| Postpartum haemorrhage | All studies               | 43          | 514/5944  | 0.095 (0.059; 0.137)  | 94.9%                | (0.000-0.989) |
|                        | Risk based NHCC           | 1           | 0/29      | 0.000 (0.000; 0.119)  | NE                   | (0.000-0.000) |
|                        | Universal                 | 23          | 359/4437  | 0.084 (0.058; 0.114)  | 86.9%                | (0.006-0.303) |
|                        | Symptom based             | 5           | 11/101    | 0.047 (0.000; 0.148)  | 48.8%                | (0.000-0.250) |
|                        | Not known                 | 14          | 144/1377  | 0.142 (0.022; 0.325)  | 97.9%                | (0.000-0.989) |
|                        | Confirmed Covid-19        | 39          | 506/5872  | 0.099 (0.061; 0.144)  | 95.2%                | (0.000-0.989) |
|                        | Admitted                  | 34          | 493/5621  | 0.095 (0.056; 0.142)  | 95.7%                | (0.000-0.989) |
|                        | All                       | 4           | 12/226    | 0.136 (0.000; 0.478)  | 93.3%                | (0.000-0.692) |
|                        | Selected                  | 5           | 9/97      | 0.078 (0.013; 0.176)  | 43.0%                | (0.000-0.231) |
|                        | High risk                 | 1           | 3/32      | 0.094 (0.020; 0.250)  | NE                   | (0.094-0.094) |
|                        | Any risk                  | 41          | 502/5899  | 0.087 (0.052; 0.129)  | 95.0%                | (0.000-0.989) |
|                        | HIC                       | 30          | 355/4524  | 0.074 (0.050; 0.102)  | 84.6%                | (0.000-0.303) |
|                        | LMIC                      | 12          | 155/1358  | 0.147 (0.019; 0.348)  | 98.2%                | (0.000-0.989) |
|                        | <b>Perinatal outcomes</b> |             |           |                       |                      |               |
| Stillbirth             | All studies               | 102         | 351/48877 | 0.004 (0.002; 0.006)  | 65.6%                | (0.000-0.235) |
|                        | Risk based NHCC           | 11          | 0/394     | 0.000 (0.000; 0.009)  | NE                   | NA            |
|                        | Universal                 | 48          | 180/22402 | 0.005 (0.002; 0.008)  | 61.2%                | (0.000-0.148) |
|                        | Symptom based             | 11          | 19/2263   | 0.003 (0.000; 0.011)  | 45.9%                | (0.000-0.080) |
|                        | Not known                 | 32          | 152/23818 | 0.005 (0.002; 0.010)  | 78.6%                | (0.000-0.235) |
|                        | Confirmed Covid-19        | 95          | 340/48070 | 0.004 (0.002; 0.006)  | 66.1%                | (0.000-0.150) |
|                        | Admitted                  | 61          | 193/21566 | 0.004 (0.002; 0.007)  | 41.2%                | (0.000-0.235) |
|                        | All                       | 17          | 93/20373  | 0.002 (0.000; 0.006)  | 80.9%                | (0.000-0.150) |
|                        | Selected                  | 24          | 65/6938   | 0.007 (0.001; 0.015)  | 62.8%                | (0.000-0.148) |
|                        | High risk                 | 3           | 1/111     | 0.002 (0.000; 0.040)  | 34.3%                | (0.000-0.067) |
|                        | Any risk                  | 95          | 342/48651 | 0.003 (0.002; 0.006)  | 64.8%                | (0.000-0.235) |
|                        | HIC                       | 55          | 202/33157 | 0.001 (0.000; 0.003)  | 55.3%                | (0.000-0.125) |
|                        | LMIC                      | 41          | 87/4724   | 0.011 (0.005; 0.019)  | 57.0%                | (0.000-0.235) |
|                        | Neonatal death            | All studies | 100       | 127/23698             | 0.000 (0.000; 0.002) | 51.2%         |
| Risk based NHCC        |                           | 12          | 1/371     | 0.000 (0.000; 0.007)  | 0.0%                 | (0.000-0.010) |
| Universal              |                           | 36          | 40/12389  | 0.000 (0.000; 0.000)  | 0.0%                 | (0.000-0.036) |
| Symptom based          |                           | 15          | 17/1615   | 0.000 (0.000; 0.001)  | 0.0%                 | (0.000-0.080) |
| Not known              |                           | 37          | 21/5404   | 0.002 (0.000; 0.0131) | 66.0%                | (0.000-0.125) |
| Confirmed Covid-19     |                           | 89          | 119/23105 | 0.0003 (0.000; 0.002) | 52.0%                | (0.000-0.308) |
| Admitted               |                           | 61          | 72/11891  | 0.001 (0.000; 0.004)  | 56.0%                | (0.000-0.308) |
| All                    |                           | 11          | 24/5329   | 0.000 (0.000; 0.000)  | 52.1%                | (0.000-0.125) |
| Selected               |                           | 28          | 31/6478   | 0.001 (0.000; 0.005)  | 40.3%                | (0.000-0.048) |
| High risk              |                           | 1           | 0/19      | 0.000 (0.000; 0.176)  | NE                   | (0.000-0.000) |

|                             |                             |          |            |                      |                      |               |
|-----------------------------|-----------------------------|----------|------------|----------------------|----------------------|---------------|
| Admission to neonatal unit  | Any risk                    | 98       | 126/23641  | 0.000 (0.000; 0.002) | 51.6%                | (0.000-0.308) |
|                             | HIC                         | 51       | 63/16582   | 0.000 (0.000; 0.000) | 28.8%                | (0.000-0.125) |
|                             | LMIC                        | 43       | 40/2741    | 0.007 (0.001; 0.015) | 46.4%                | (0.000-0.308) |
|                             | All studies                 | 97       | 3088/17687 | 0.252 (0.211; 0.296) | 97.1%                | (0.000-1.000) |
|                             | Risk based NHCC             | 7        | 76/240     | 0.202 (0.031; 0.453) | 93.3%                | (0.000-0.700) |
|                             | Universal                   | 44       | 1868/10616 | 0.258 (0.206; 0.314) | 96.5%                | (0.000-1.000) |
|                             | Symptom based               | 10       | 222/1504   | 0.240 (0.091; 0.430) | 97.7%                | (0.018-1.000) |
|                             | Not known                   | 36       | 922/5327   | 0.259 (0.177; 0.351) | 97.7%                | (0.001-0.980) |
|                             | Confirmed Covid-19 Admitted | 89       | 2891/17245 | 0.221 (0.182; 0.261) | 96.8%                | (0.000-1.000) |
|                             | All                         | 54       | 1870/11308 | 0.258 (0.204; 0.315) | 96.8%                | (0.000-1.000) |
|                             | Selected                    | 17       | 571/4020   | 0.245 (0.134; 0.376) | 98.5%                | (0.001-1.000) |
|                             | High risk                   | 26       | 647/2359   | 0.246 (0.181; 0.317) | 92.1%                | (0.000-0.700) |
|                             | Any risk                    | 3        | 42/141     | 0.367 (0.090; 0.700) | 91.5%                | (0.172-0.636) |
|                             | Neonatal sepsis             | Any risk | 93         | 3041/17508           | 0.250 (0.208; 0.294) | 97.2%         |
| HIC                         |                             | 57       | 2262/13229 | 0.234 (0.188; 0.282) | 96.6%                | (0.000-1.000) |
| LMIC                        |                             | 34       | 547/2328   | 0.305 (0.178; 0.449) | 97.8%                | (0.000-1.000) |
| All studies                 |                             | 19       | 25/2557    | 0.005 (0.002; 0.009) | 3.2%                 | (0.000-0.033) |
| Risk based NHCC             |                             | 1        | 1/33       | 0.030 (0.001; 0.158) | NE                   | (0.030-0.030) |
| Universal                   |                             | 7        | 10/1372    | 0.003 (0.000; 0.011) | 32.1%                | (0.000-0.031) |
| Symptom based               |                             | 4        | 3/213      | 0.010 (0.000; 0.033) | 0.0%                 | (0.000-0.028) |
| Not known                   |                             | 7        | 11/939     | 0.009 (0.003; 0.018) | 0.0%                 | (0.007-0.033) |
| Confirmed Covid-19 Admitted |                             | 19       | 25/2557    | 0.005 (0.002; 0.009) | 3.2%                 | (0.000-0.033) |
| All                         |                             | 11       | 14/1198    | 0.008 (0.002; 0.017) | 29.5%                | (0.000-0.033) |
| Selected                    |                             | 3        | 7/868      | 0.004 (0.000; 0.012) | 2.8%                 | (0.007-0.028) |
| High risk                   |                             | 5        | 4/491      | 0.003 (0.000; 0.013) | 0.0%                 | (0.000-0.030) |
| Any risk                    |                             | NA       | NA         | NA                   | NA                   | NA            |
| Abnormal APGAR <5           |                             | Any risk | 19         | 25/2557              | 0.005 (0.002; 0.009) | 3.2%          |
|                             | HIC                         | 9        | 5/786      | 0.002 (0.000; 0.008) | 9.7%                 | (0.000-0.031) |
|                             | LMIC                        | 7        | 10/625     | 0.013 (0.004; 0.025) | 0.0%                 | (0.007-0.033) |
|                             | All studies                 | 64       | 156/5590   | 0.014 (0.007; 0.024) | 59.5%                | (0.000-0.263) |
|                             | Risk based NHCC             | 7        | 2/225      | 0.002 (0.000; 0.019) | 0.0%                 | (0.000-0.059) |
|                             | Universal                   | 26       | 49/2635    | 0.005 (0.000; 0.014) | 42.0%                | (0.000-0.148) |
|                             | Symptom based               | 9        | 11/429     | 0.009 (0.000; 0.036) | 50.2%                | (0.000-0.111) |
|                             | Not known                   | 22       | 94/2301    | 0.037 (0.018; 0.061) | 73.9%                | (0.000-0.263) |
|                             | Confirmed Covid-19 Admitted | 57       | 153/5350   | 0.016 (0.008; 0.026) | 63.1%                | (0.000-0.263) |
|                             | All                         | 40       | 74/3160    | 0.010 (0.002; 0.021) | 52.2%                | (0.000-0.231) |
|                             | Selected                    | 6        | 33/1012    | 0.023 (0.002; 0.061) | 78.8%                | (0.000-0.111) |
|                             | High risk                   |          |            |                      |                      |               |
|                             | Any risk                    |          |            |                      |                      |               |



|                |                    |    |          |                      |       |               |
|----------------|--------------------|----|----------|----------------------|-------|---------------|
| Fetal distress | Selected           | 18 | 49/1418  | 0.024 (0.009; 0.045) | 64.8% | (0.000-0.263) |
|                | High risk          | 1  | 3/15     | 0.200 (0.043; 0.481) | NE    | (0.200-0.200) |
|                | Any risk           | 61 | 139/5510 | 0.010 (0.005; 0.017) | 47.3% | (0.000-0.231) |
|                | HIC                | 38 | 100/4327 | 0.007 (0.002; 0.015) | 45.7% | (0.000-0.222) |
|                | LMIC               | 24 | 49/1030  | 0.031 (0.010; 0.060) | 66.9% | (0.000-0.263) |
|                | All studies        | 45 | 535/4398 | 0.122 (0.098; 0.149) | 79.3% | (0.043-0.556) |
|                | Risk based         | 7  | 32/298   | 0.103 (0.069; 0.145) | 0.0%  | (0.043-0.155) |
|                | NHCC               |    |          |                      |       |               |
|                | Universal          | 13 | 159/808  | 0.131 (0.073; 0.201) | 83.3% | (0.043-0.405) |
|                | Symptom based      | 6  | 36/318   | 0.120 (0.058; 0.196) | 62.0% | (0.058-0.333) |
|                | Not known          | 19 | 308/2974 | 0.123 (0.089; 0.160) | 83.3% | (0.052-0.556) |
|                | Confirmed Covid-19 | 38 | 425/3449 | 0.126 (0.097; 0.159) | 82.5% | (0.043-0.556) |
|                | Admitted           | 29 | 255/1602 | 0.137 (0.100; 0.179) | 76.4% | (0.043-0.556) |
|                | All                | 7  | 104/1251 | 0.071 (0.040; 0.109) | 58.6% | (0.052-0.333) |
|                | Selected           | 9  | 176/1545 | 0.112 (0.085; 0.142) | 52.8% | (0.062-0.289) |
|                | High risk          | NA | NA       | NA                   | NA    | NA            |
|                | Any risk           | 43 | 519/4360 | 0.119 (0.095; 0.145) | 78.9% | (0.043-0.556) |
|                | HIC                | 11 | 120/1604 | 0.051 (0.040; 0.064) | 0.0%  | (0.043-0.167) |
|                | LMIC               | 31 | 300/1856 | 0.149 (0.115; 0.186) | 73.1% | (0.043-0.556) |

*N – Number of pregnant or recently pregnant women for COVID-related outcomes and for preterm birth outcomes; number of women delivered for caesarean section; number of babies born for perinatal outcomes; CI – Confidence Interval;; ECMO – Extra corporeal membrane oxygenation; NHCC National Health Commission China; NA – Not available; NE – Not estimatable; HIC – High Income Countries; LMIC – Low and Middle Income Countries*

*Risk based NHCC, Universal and Symptom based, Not Known=Sampling frames for detecting COVID-19; Confirmed COVID-19=Analysis restricted to women with laboratory confirmation of COVID-19 only; Admitted, All, Selected = Population types of women in studies; Any risk, High risk = Pregnancy risk status*

**Appendix 9** Absolute risk of outcomes in pregnant and recently pregnant women with coronavirus disease 2019 (covid-19)

| Outcomes                                                                      | No of studies | Women (No with event/No in group (%)) |                        | Risk Difference (95% CI)     | I <sup>2</sup> (%) |
|-------------------------------------------------------------------------------|---------------|---------------------------------------|------------------------|------------------------------|--------------------|
|                                                                               |               | Pregnant women with covid-19          | Comparison group       |                              |                    |
| <b>Comparison group: non-pregnant women of reproductive age with covid-19</b> |               |                                       |                        |                              |                    |
| All-cause mortality                                                           | 11            | 242/122 222 (0.2)                     | 5 252/2 138 726 (0.2)  | 0.001 (-0.0038 to 0.0058)    | 77.5               |
| ICU admission                                                                 | 10            | 912/118 403 (0.8)                     | 11 513/1 908 957 (0.6) | 0.0182 (0.0054 to 0.031)     | 86.5               |
| Invasive ventilation                                                          | 8             | 310/116 458 (0.3)                     | 3607/1 772 716 (0.2)   | 0.0196 (0.0003 to 0.039)     | 90.0               |
| ECMO                                                                          | 5             | 19/30 694 (0.1)                       | 122/432 623 (0.0)      | 0.0003 (0.0000 to 0.0006)    | 0                  |
| Oxygen through nasal cannula                                                  | 2             | 8/48 (16.7)                           | 49/106 (46.2)          | -0.3272 (-0.4851 to -0.1693) | 20.3               |
| ARDS                                                                          | 4             | 22/197 (11.2)                         | 45/418 (10.8)          | 0.0329 (-0.0883 to 0.1542)   | 83.6               |
| Major organ failure                                                           | 4             | 5/197 (2.5)                           | 28/418 (6.7)           | -0.0306 (-0.0537 to -0.0075) | 0                  |
| <b>Comparison group: pregnant women without covid-19</b>                      |               |                                       |                        |                              |                    |
| Maternal outcomes:                                                            |               |                                       |                        |                              |                    |
| All-cause mortality                                                           | 21            | 47/11 362 (0.4)                       | 37/411 126 (0.0)       | 0.0016 (0.0007 to 0.0024)    | 0                  |
| ICU admission                                                                 | 21            | 447/12 957 (3.4)                      | 1 962/459 359 (0.4)    | 0.024 (0.0157 to 0.0323)     | 74.9               |
| Preterm birth <37 weeks                                                       | 48            | 1 306/12 076 (10.8)                   | 26 068/436 964 (6.0)   | 0.0353 (0.0194 to 0.0512)    | 61.8               |
| Caesarean section                                                             | 53            | 4165/12 385 (33.6)                    | 147 645/614 402 (24.0) | 0.0377 (0.0043 to 0.071)     | 84.7               |
| Perinatal outcomes:                                                           |               |                                       |                        |                              |                    |
| Stillbirth                                                                    | 25            | 76/9 338 (0.8)                        | 1 397/414 139 (0.3)    | 0.0015 (-0.0006 to 0.0037)   | 2.3                |
| Neonatal death                                                                | 21            | 16/3 153 (0.5)                        | 28/9 263 (0.3)         | 0.0007 (-0.0025 to 0.0039)   | 0                  |
| Admission to neonatal unit                                                    | 29            | 687/4 072 (16.9)                      | 6 968/193 124 (3.6)    | 0.1093 (0.0318 to 0.1868)    | 97.8               |
| Abnormal Apgar score at 5 minutes                                             | 16            | 41/1 607 (2.6)                        | 7 776/1 90 638 (4.1)   | 0.0052 (-0.0029 to 0.0133)   | 0                  |
| Fetal distress                                                                | 6             | 131/1 073 (12.2)                      | 246/3 933 (6.3)        | 0.0499 (0.0261 to 0.0737)    | 7.4                |

ICU=intensive care unit; ECMO=extracorporeal membrane oxygenation; ARDS=acute respiratory distress syndrome.

*Includes historical comparative cohorts from; Vousden N 2021 (694 women) – All-cause mortality, Admission to intensive care unit, Caesarean section, Preterm birth, Stillbirth, Neonatal death, and Admission to neonatal unit; Li N 2020 (242 women) – Preterm birth, Caesarean section and Fetal distress; Gulersen et al 2020 (50 women) – Caesarean section; Overtoom EM 2020 (183 413 women) – Caesarean section, Admission to neonatal unit and Abnormal Apgar at 5 minutes; Janevic T 2021 (3 508 women) – Preterm birth; Facchetti F 2020 (86 women) – Stillbirth and Abnormal Apgar at 5 minutes*

## Appendix 10: Study-level forest plots for COVID-19, pregnancy-related maternal and perinatal outcomes

### COVID-19 related outcomes

#### Any Mortality

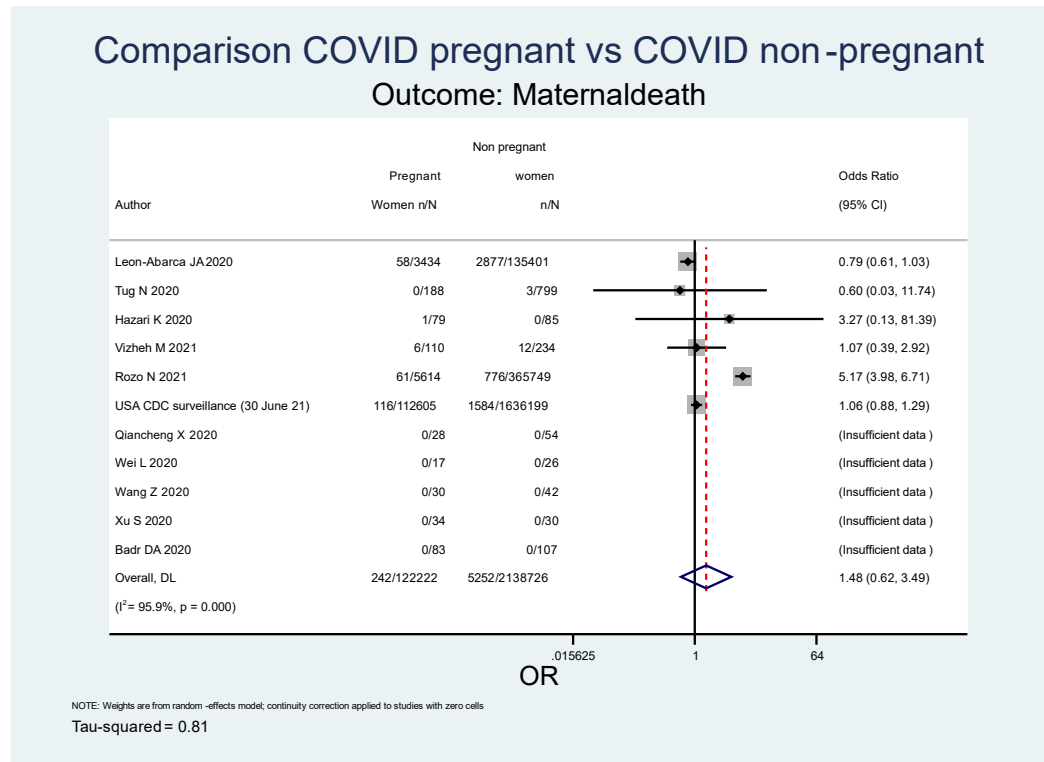

#### Admission to Intensive Care Unit

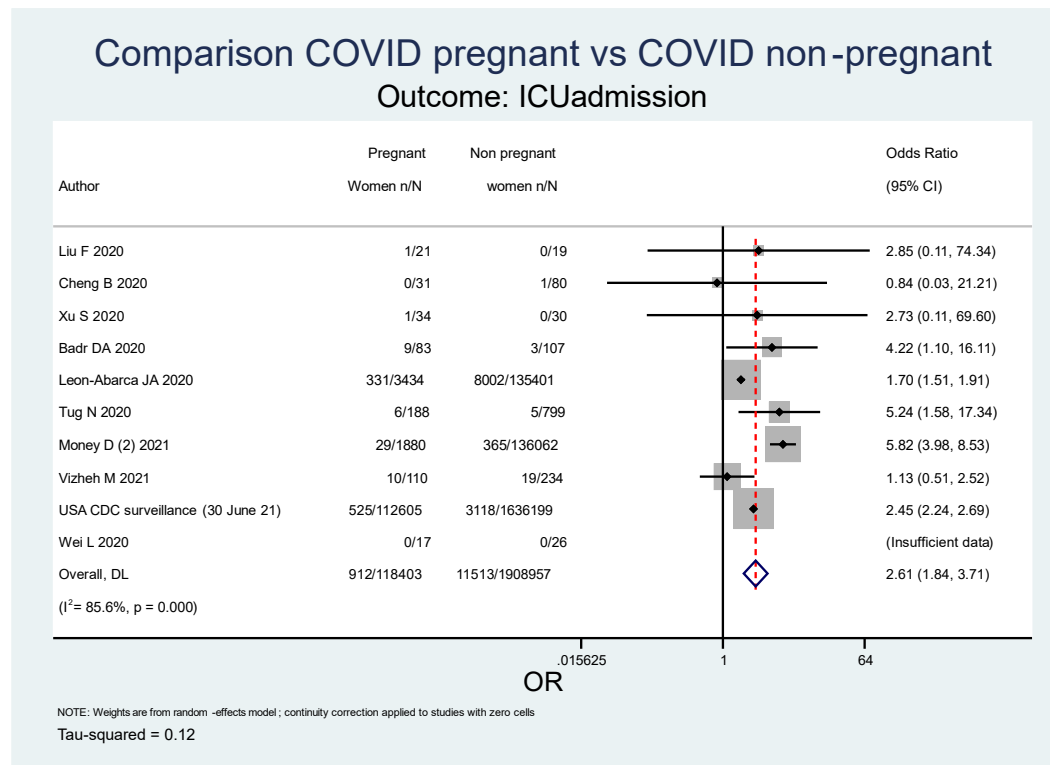

## Invasive ventilation

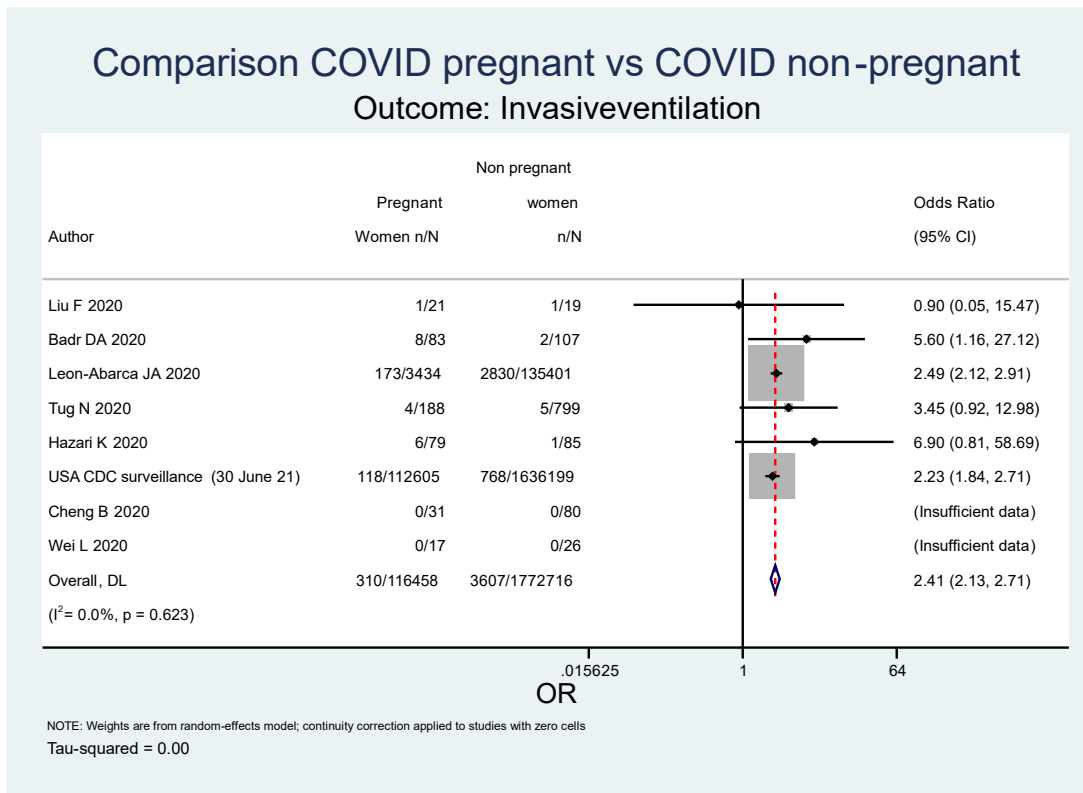

## Need for ECMO

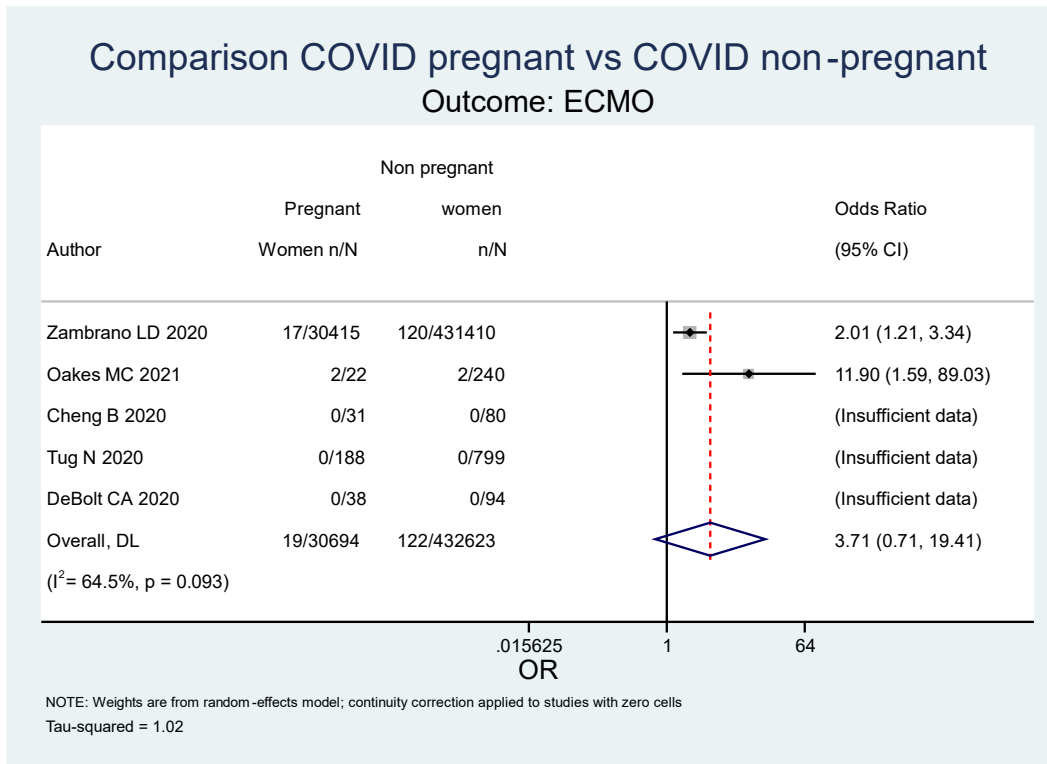

## Oxygen through nasal canula

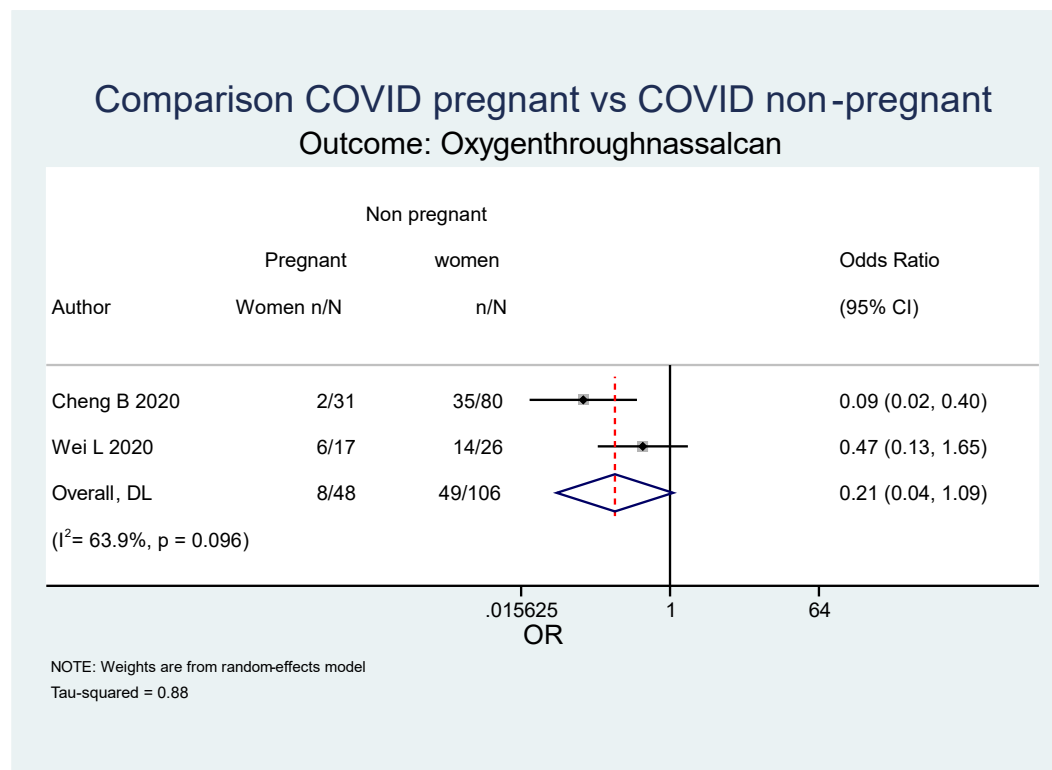

## ARDS

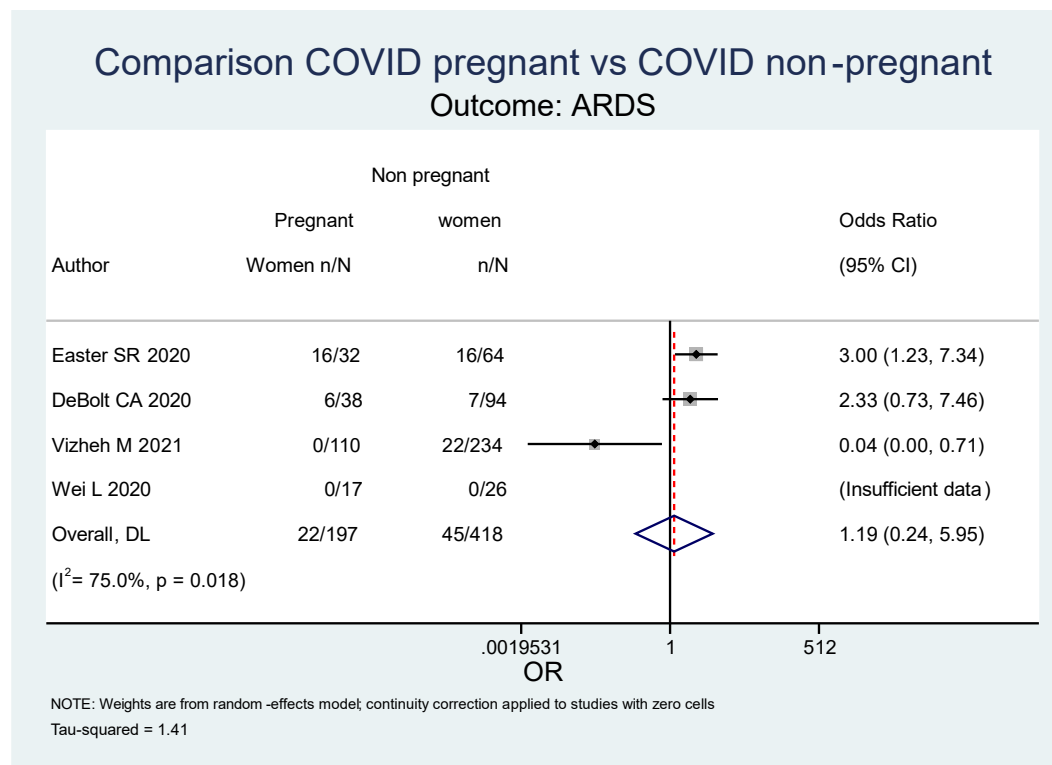

## Major organ failure

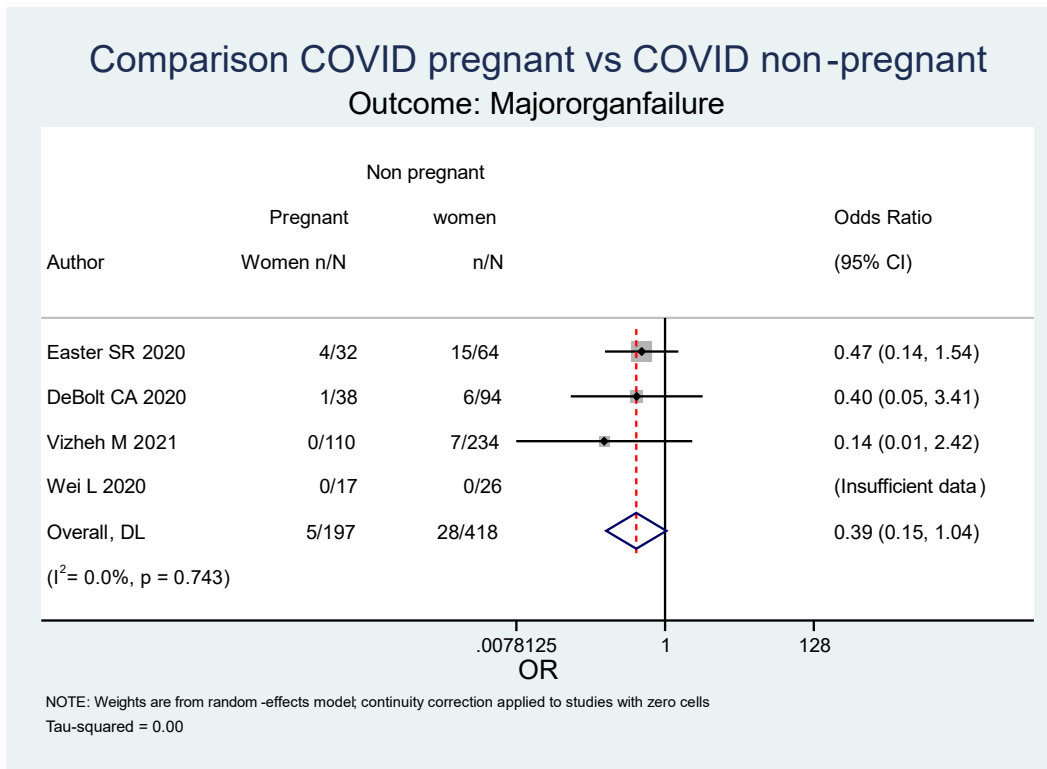

## Pregnancy-related maternal outcomes

### Any mortality

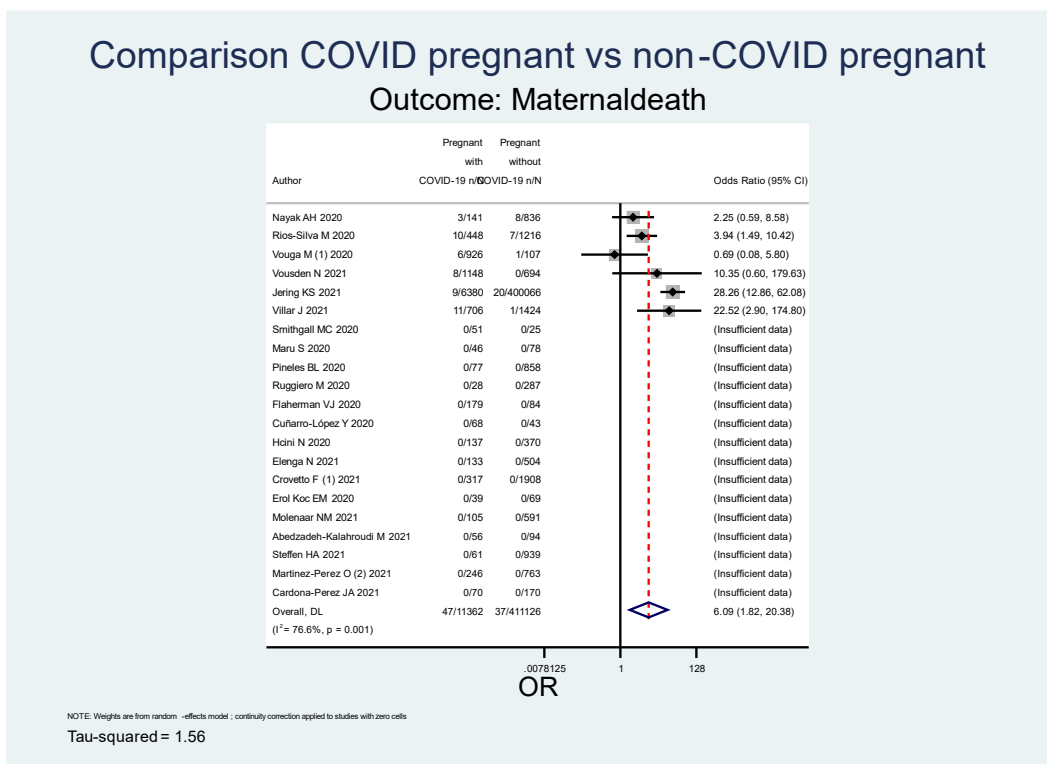

Admission to Intensive Care Unit

## Comparison COVID pregnant vs non-COVID pregnant Outcome: ICUadmission

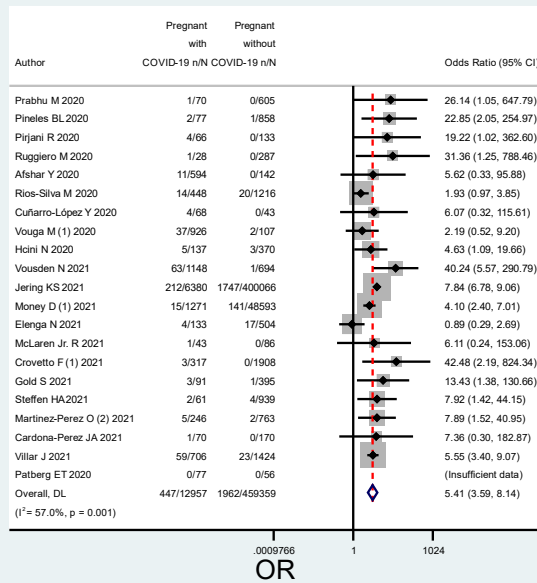

NOTE: Weights are from random-effects model; continuity correction applied to studies with zero cells  
Tau-squared = 0.28

Preterm birth <37 weeks

## Comparison COVID pregnant vs non-COVID pregnant Outcome: Preterm\_LT\_37

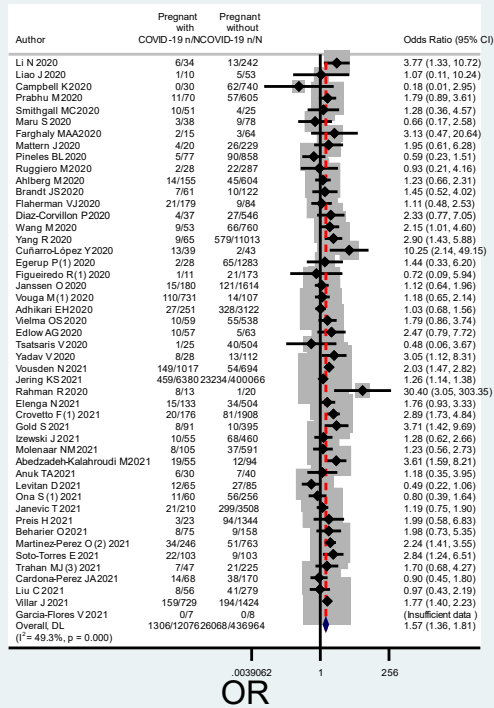

NOTE: Weights are from random-effects model; continuity correction applied to studies with zero cells  
Tau-squared = 0.08

Caesarean section

## Comparison COVID pregnant vs non-COVID pregnant Outcome: CS

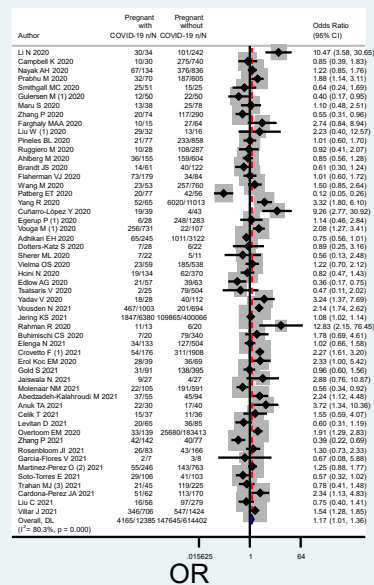

NOTE: Weights are from random-effects model  
Tau-squared = 0.18

Perinatal Outcomes

Stillbirth

## Comparison COVID pregnant vs non-COVID pregnant Outcome: Stillbirth

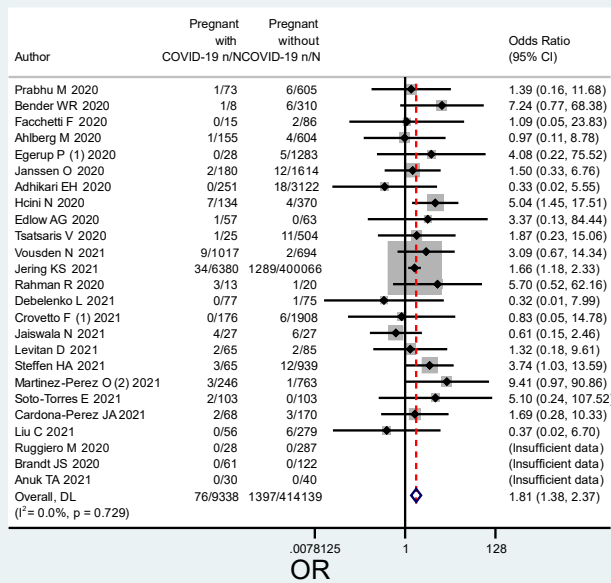

NOTE: Weights are from random-effects model; continuity correction applied to studies with zero cells  
Tau-squared = 0.00



Neonatal death

### Comparison COVID pregnant vs non-COVID pregnant Outcome: Neonatal death

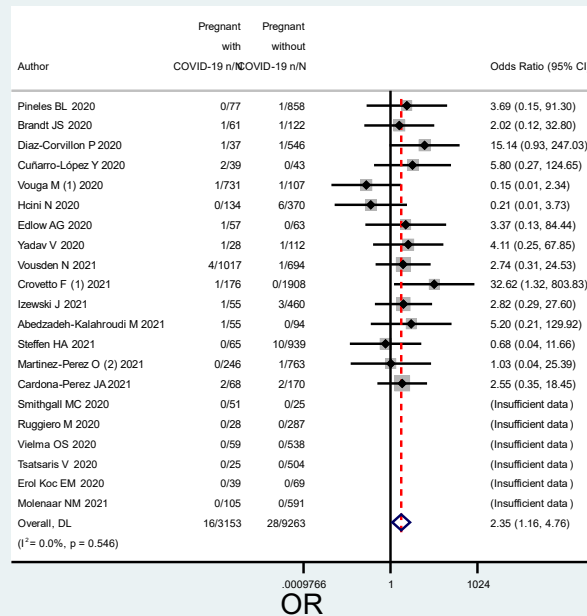

NOTE: Weights are from random-effects model; continuity correction applied to studies with zero cells  
Tau-squared = 0.00

Admission to neonatal unit

### Comparison COVID pregnant vs non-COVID pregnant Outcome: NICU admission

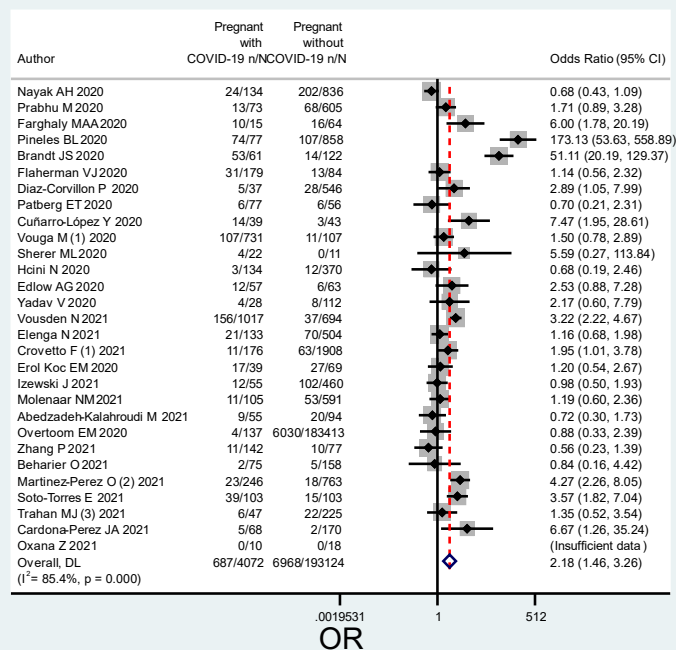

NOTE: Weights are from random-effects model; continuity correction applied to studies with zero cells  
Tau-squared = 0.93

## Abnormal Apgar at 5min

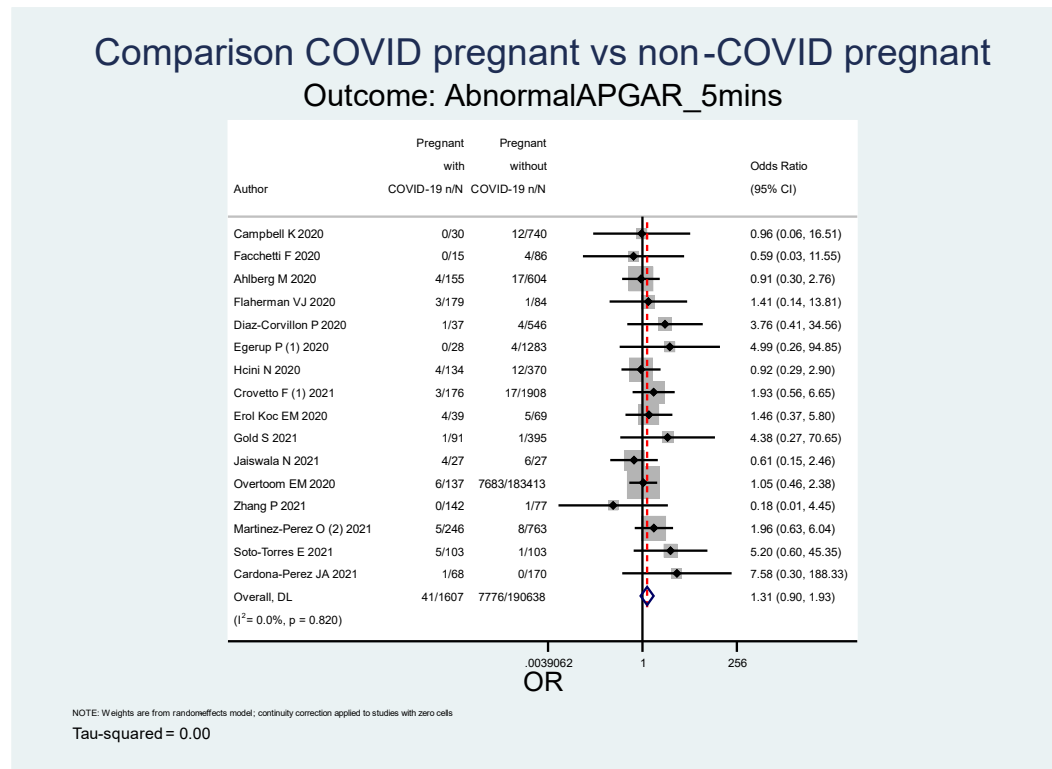

## Fetal distress

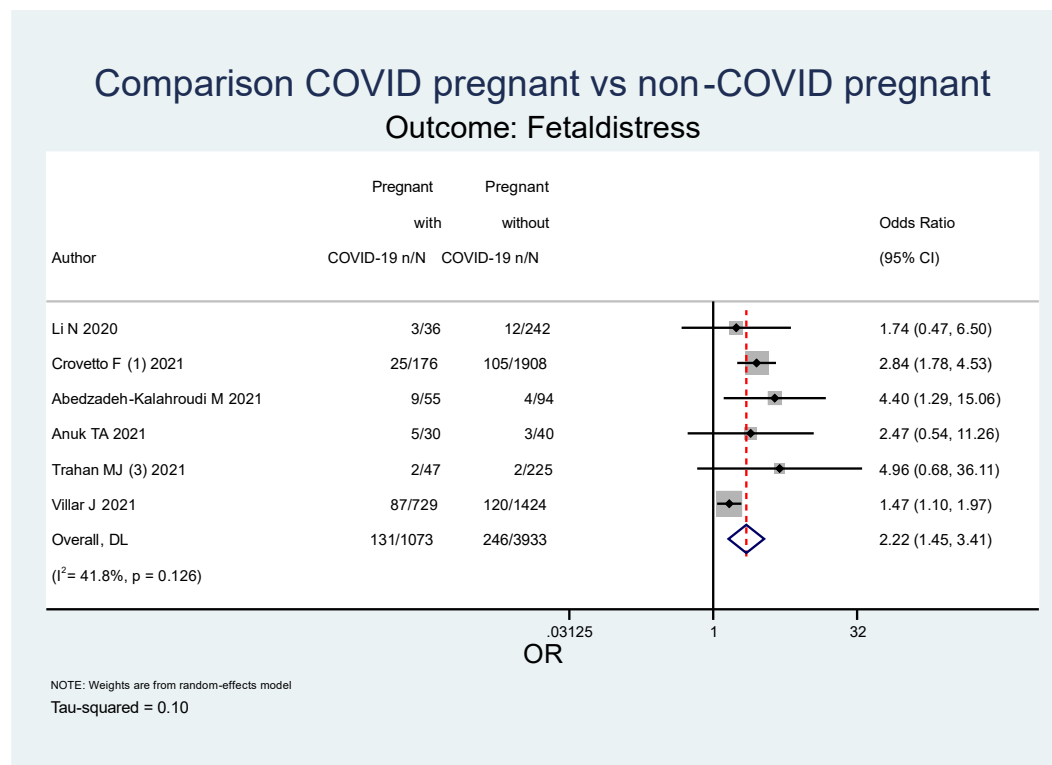

Supplement: allj058888_2.ww.pdf [file allj058888_2.ww.pdf]
